# Supplementary material (part 1 of 2)
Source: ML conference proceedings conference paper supplement (https://aclanthology.org/2021.deelio-1.9)

BERT

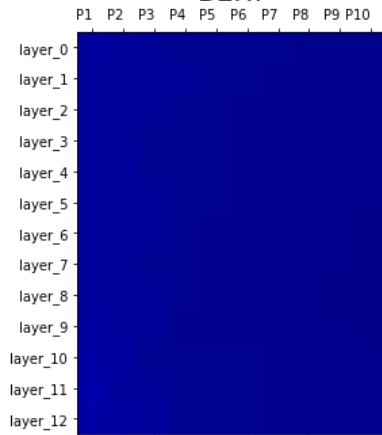

GPT2

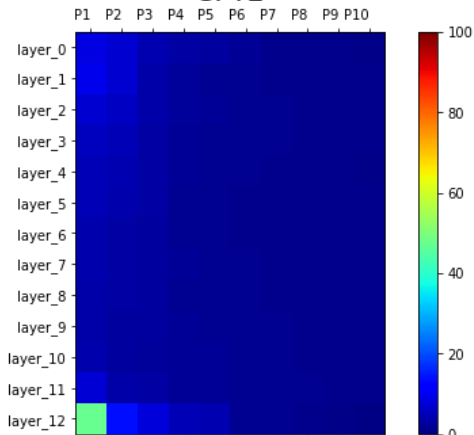

XLNet

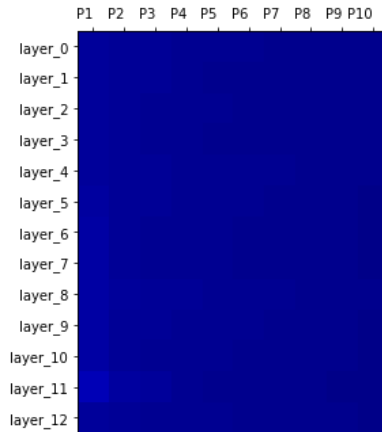

ELECTRA

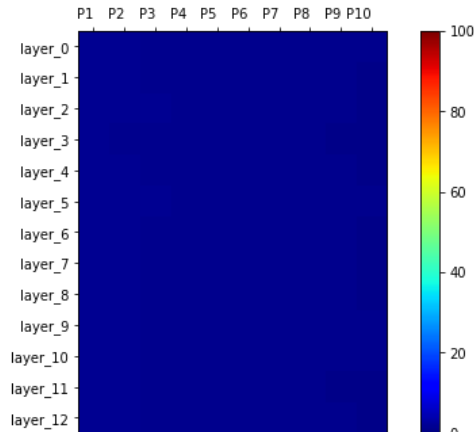

Supplement: OptionalSupplementaryData [file 4by4_all_pca_after.pdf › plots/4by4_all_pca_after.pdf]

BERT

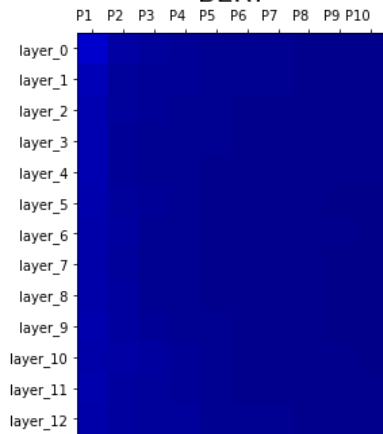

GPT2

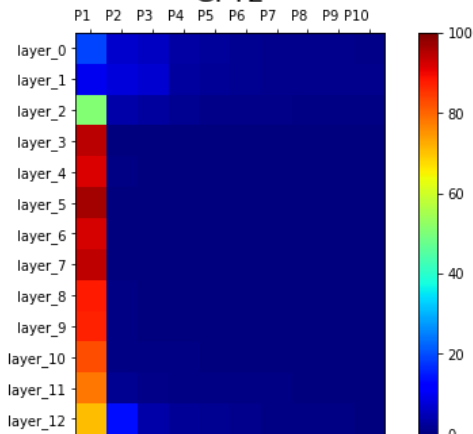

XLNet

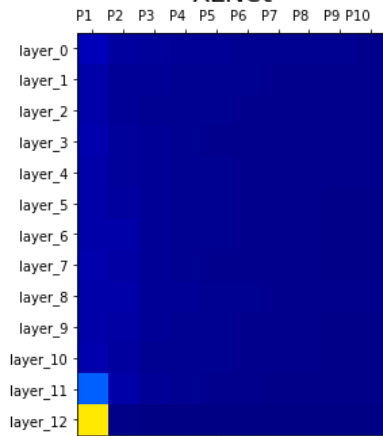

ELECTRA

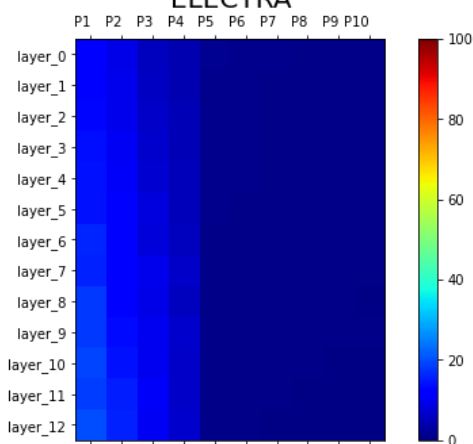

Supplement: OptionalSupplementaryData [file 4by4_all_pca_before.pdf › plots/4by4_all_pca_before.pdf]

BERT Layer 4

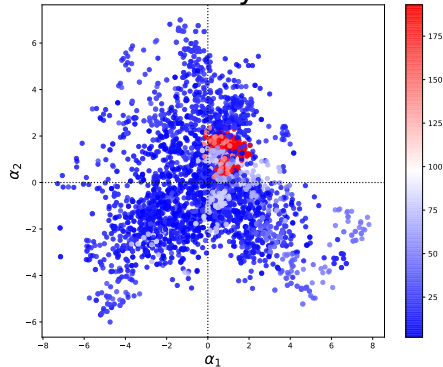

GPT2 Layer 4

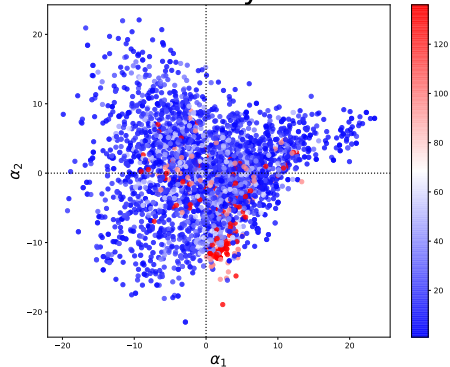

XLNet Layer 4

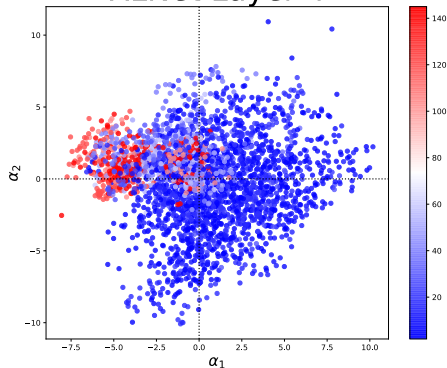

ELECTRA Layer 4

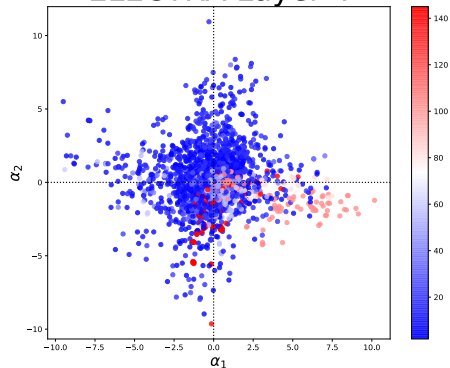

Supplement: OptionalSupplementaryData [file 4by4_emb_visual_after.pdf › plots/4by4_emb_visual_after.pdf]

BERT Layer 4

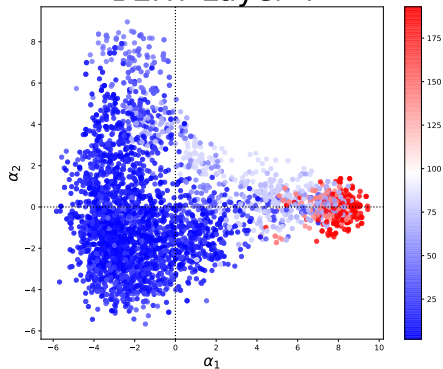

GPT2 Layer 4

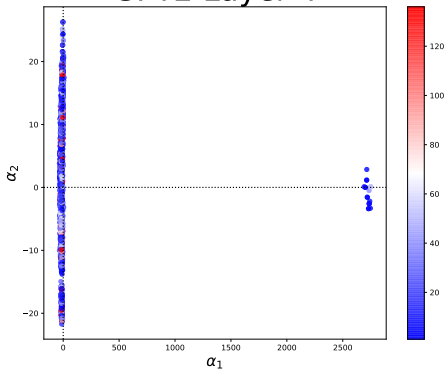

XLNet Layer 4

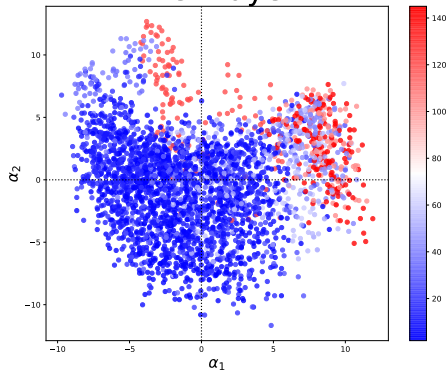

ELECTRA Layer 4

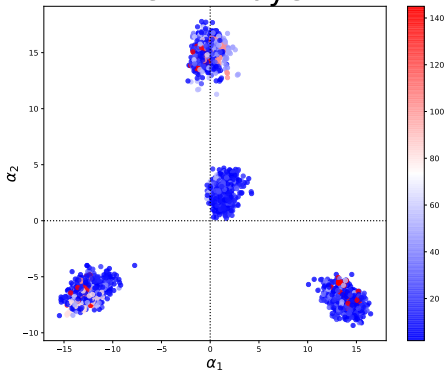

Supplement: OptionalSupplementaryData [file 4by4_emb_visual_before.pdf › plots/4by4_emb_visual_before.pdf]

# BERT Layer 0

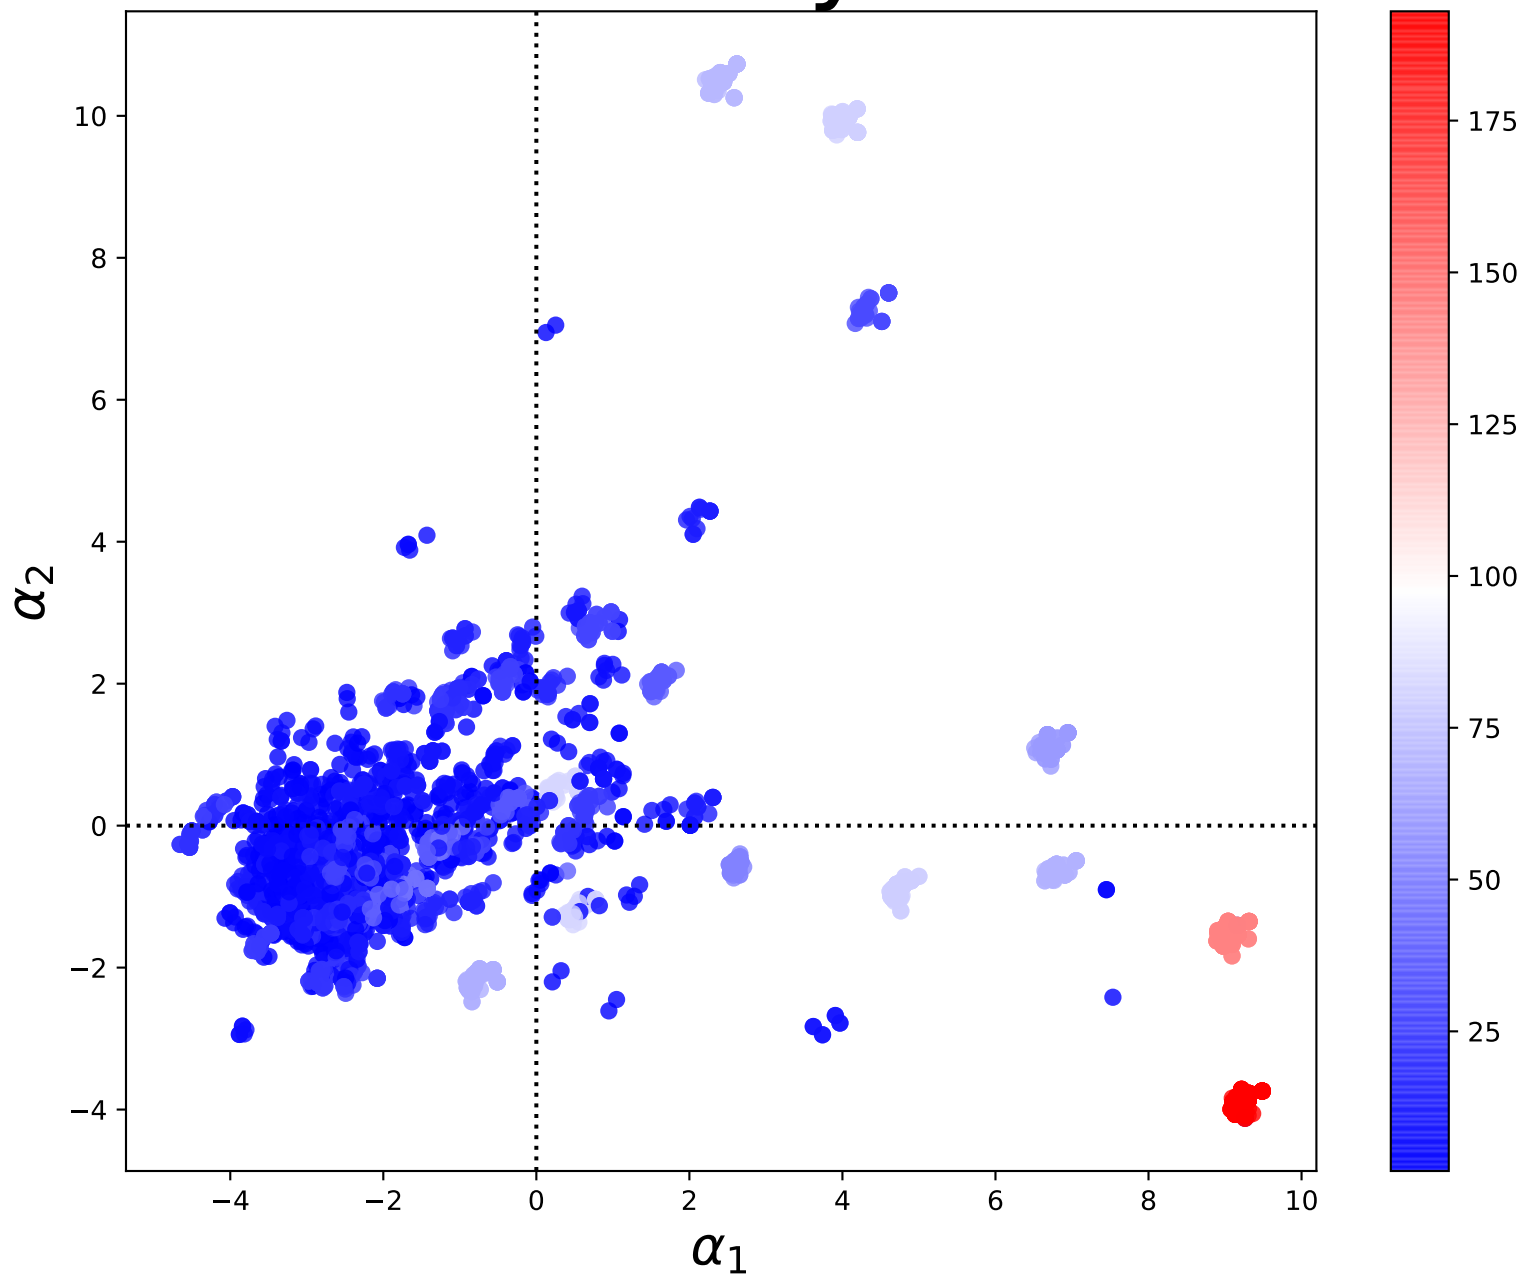

Supplement: OptionalSupplementaryData [file wf_aniso_bert_0.pdf › plots/appendix_plots/wf_aniso_bert_0.pdf]

# BERT Layer 1

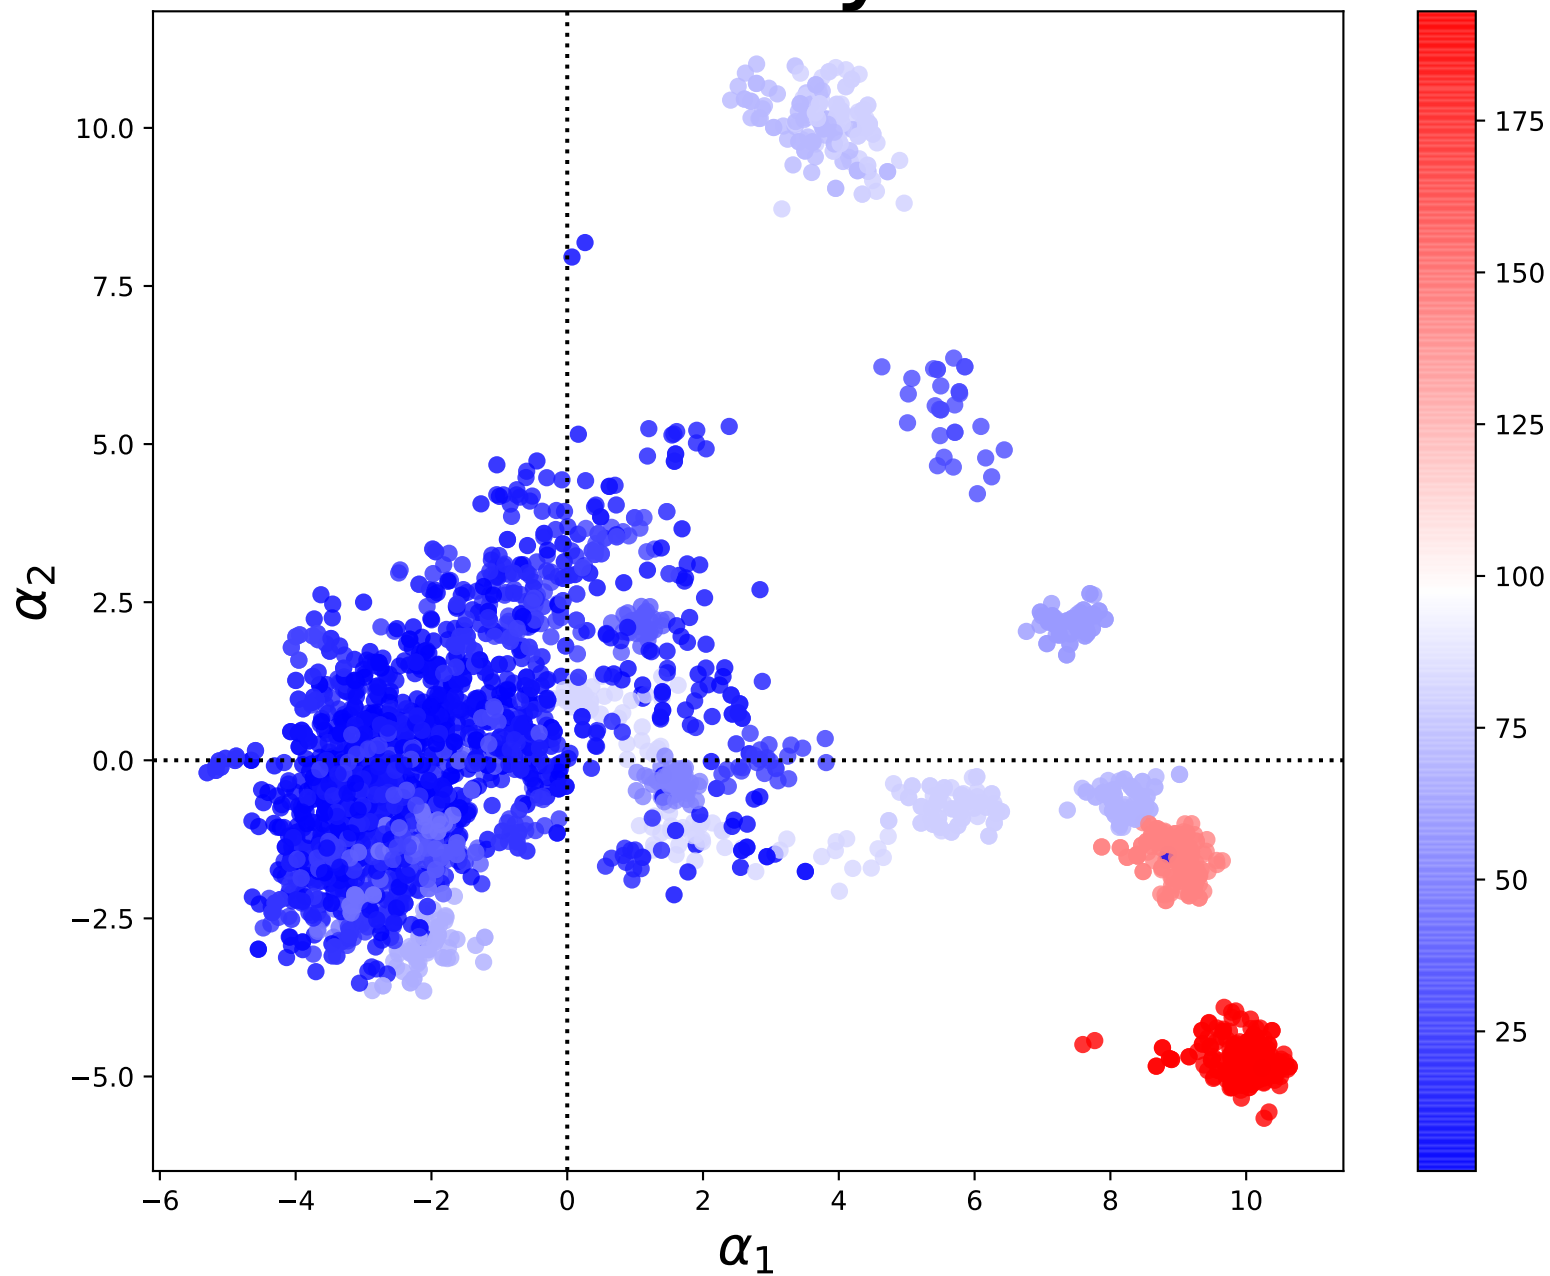

Supplement: OptionalSupplementaryData [file wf_aniso_bert_1.pdf › plots/appendix_plots/wf_aniso_bert_1.pdf]

# BERT Layer 10

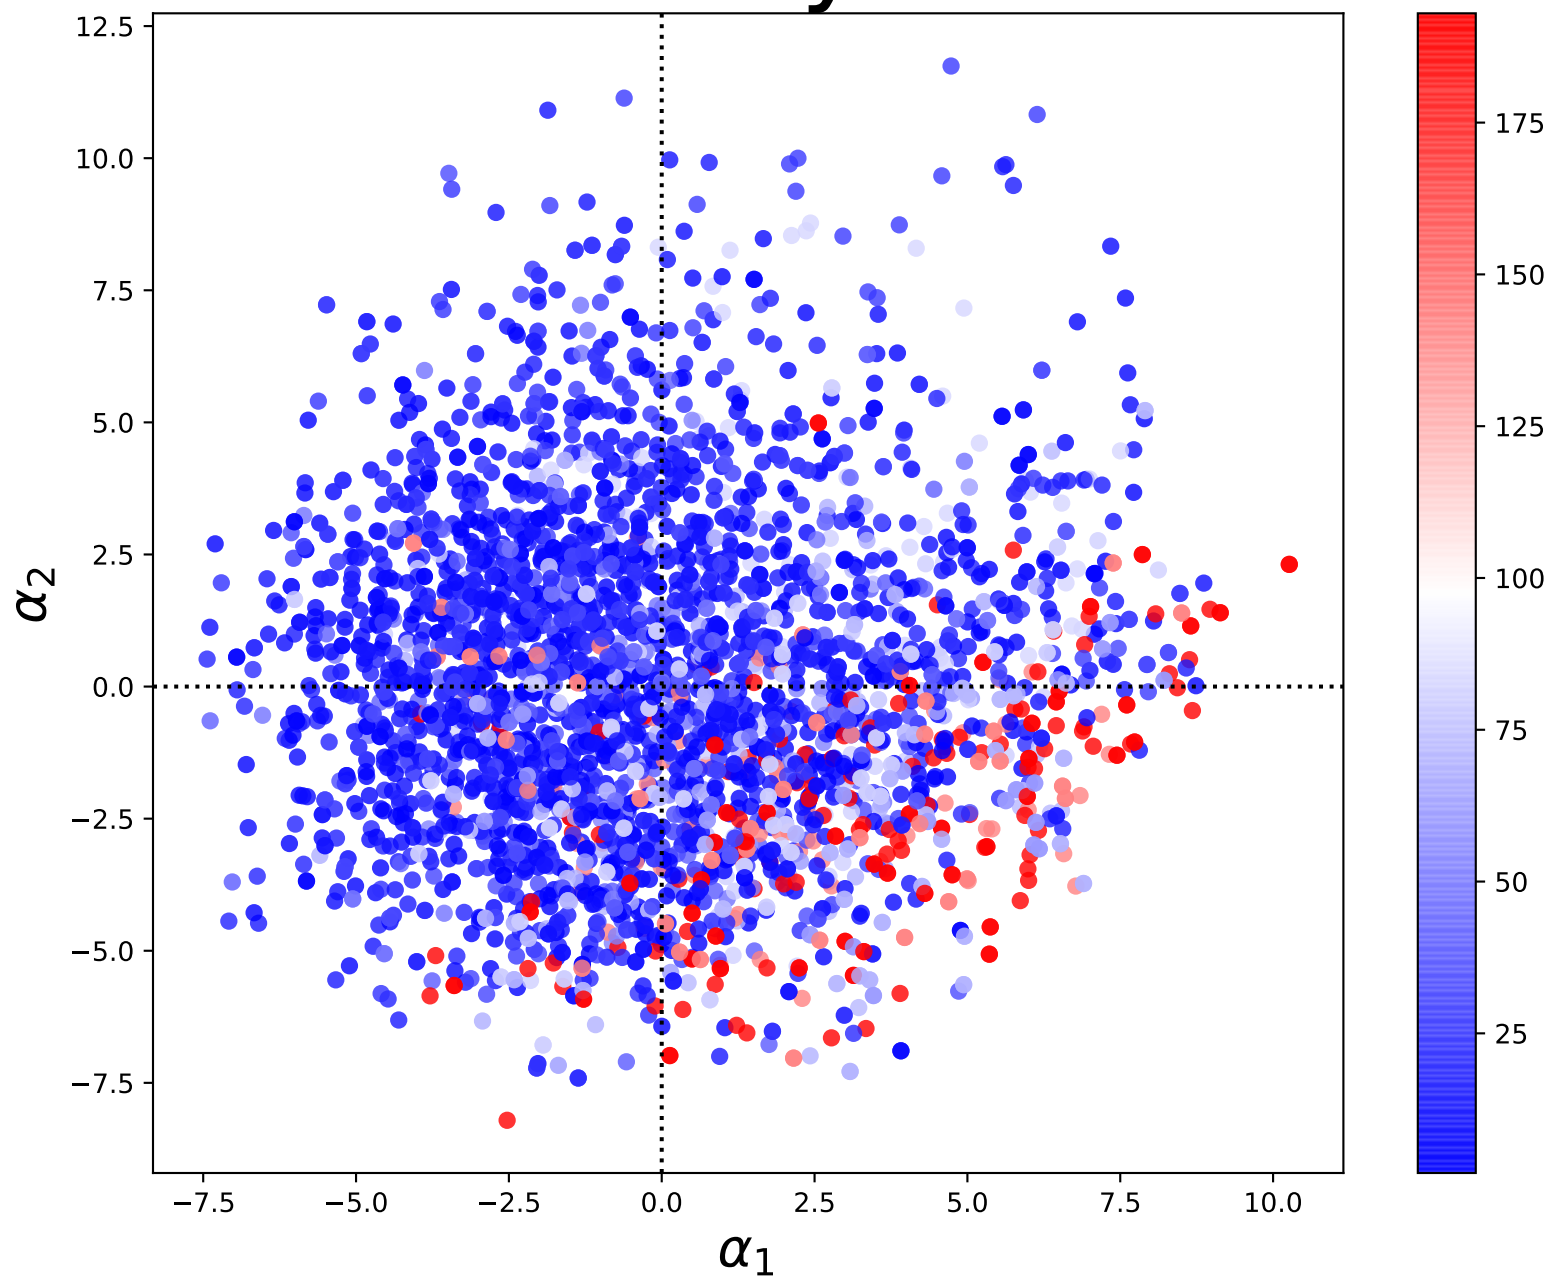

Supplement: OptionalSupplementaryData [file wf_aniso_bert_10.pdf › plots/appendix_plots/wf_aniso_bert_10.pdf]

# BERT Layer 11

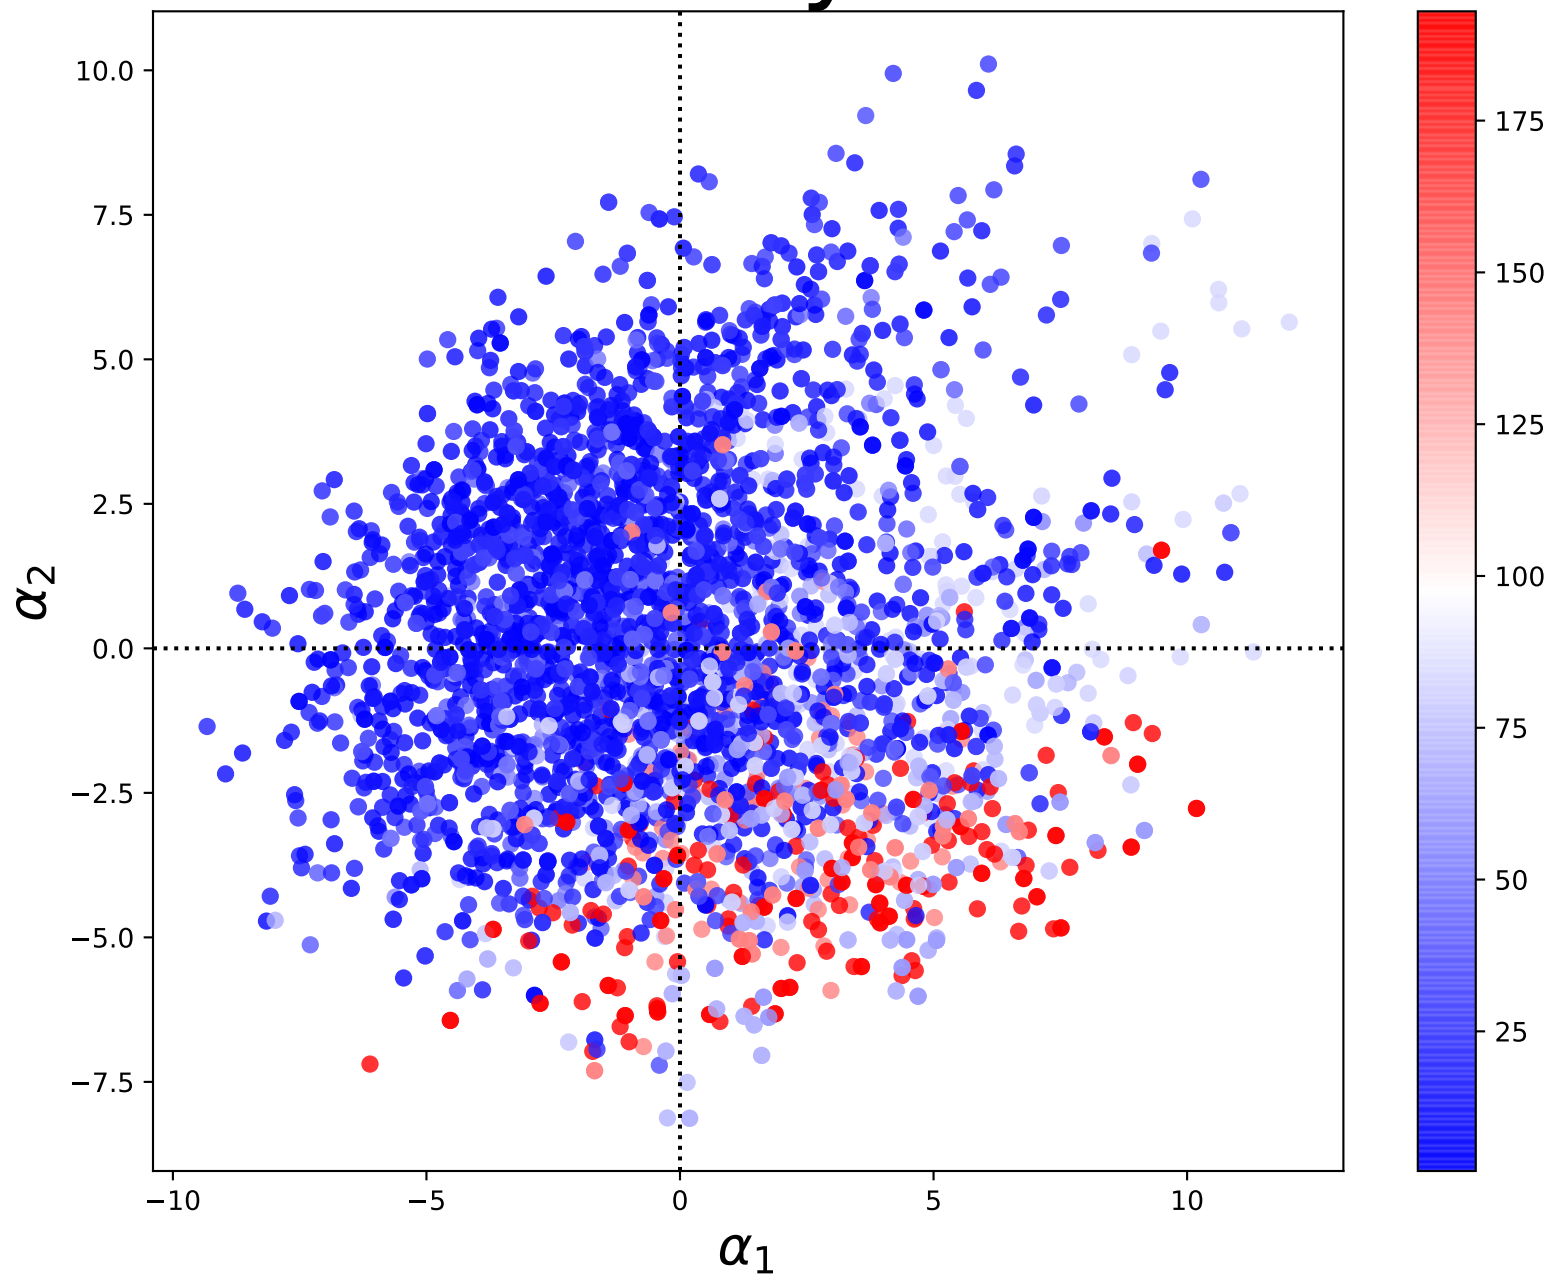

Supplement: OptionalSupplementaryData [file wf_aniso_bert_11.pdf › plots/appendix_plots/wf_aniso_bert_11.pdf]

# BERT Layer 12

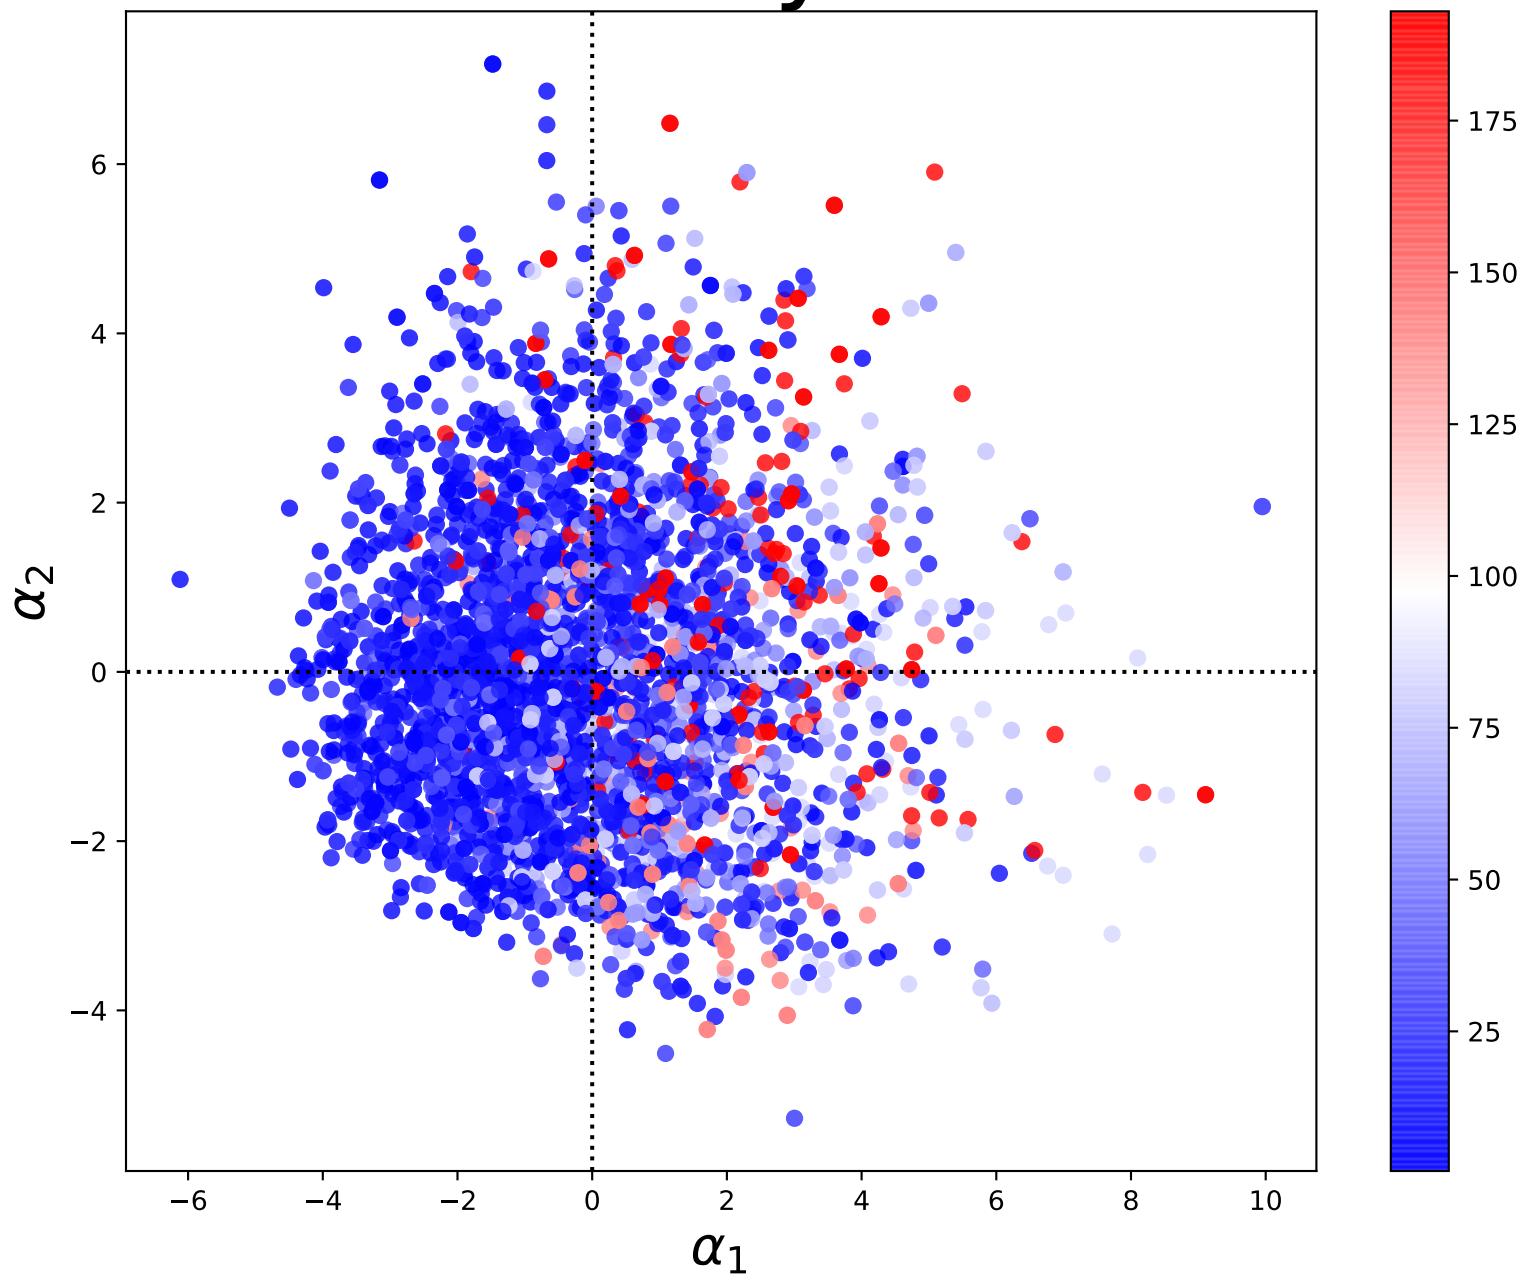

Supplement: OptionalSupplementaryData [file wf_aniso_bert_12.pdf › plots/appendix_plots/wf_aniso_bert_12.pdf]

# BERT Layer 2

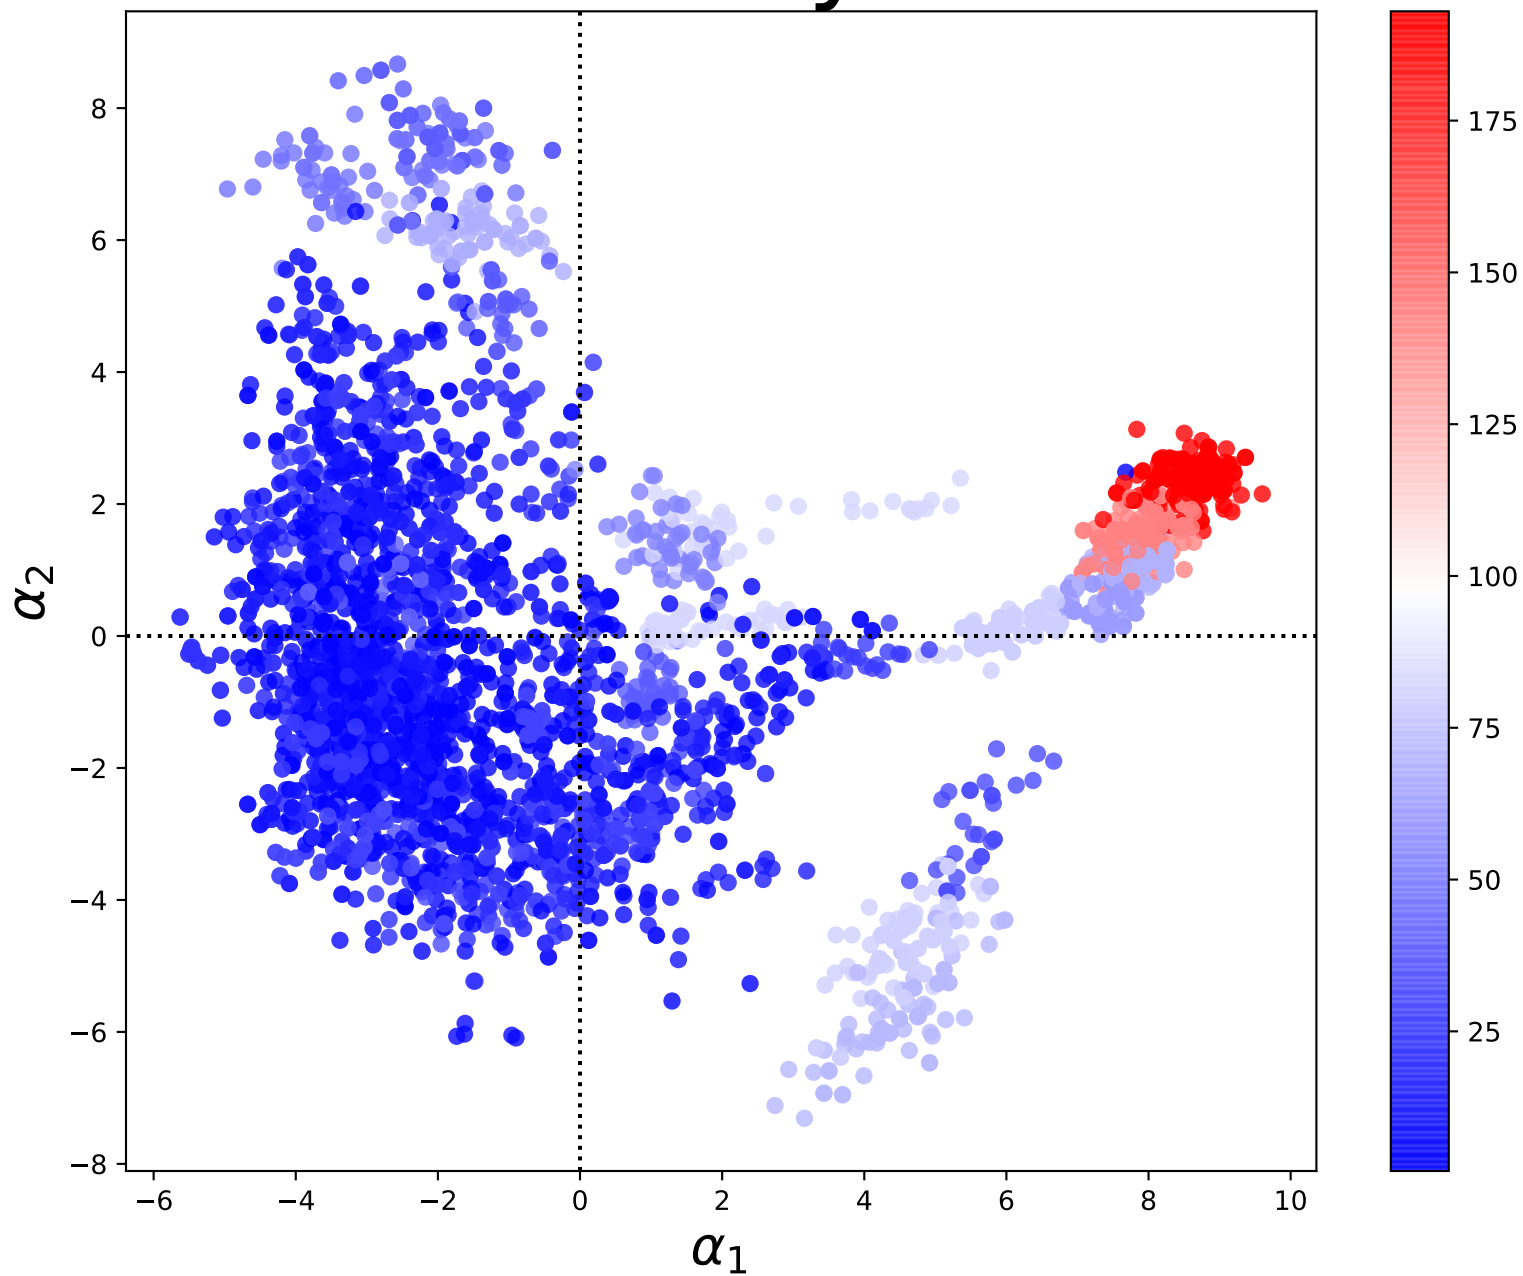

Supplement: OptionalSupplementaryData [file wf_aniso_bert_2.pdf › plots/appendix_plots/wf_aniso_bert_2.pdf]

# BERT Layer 3

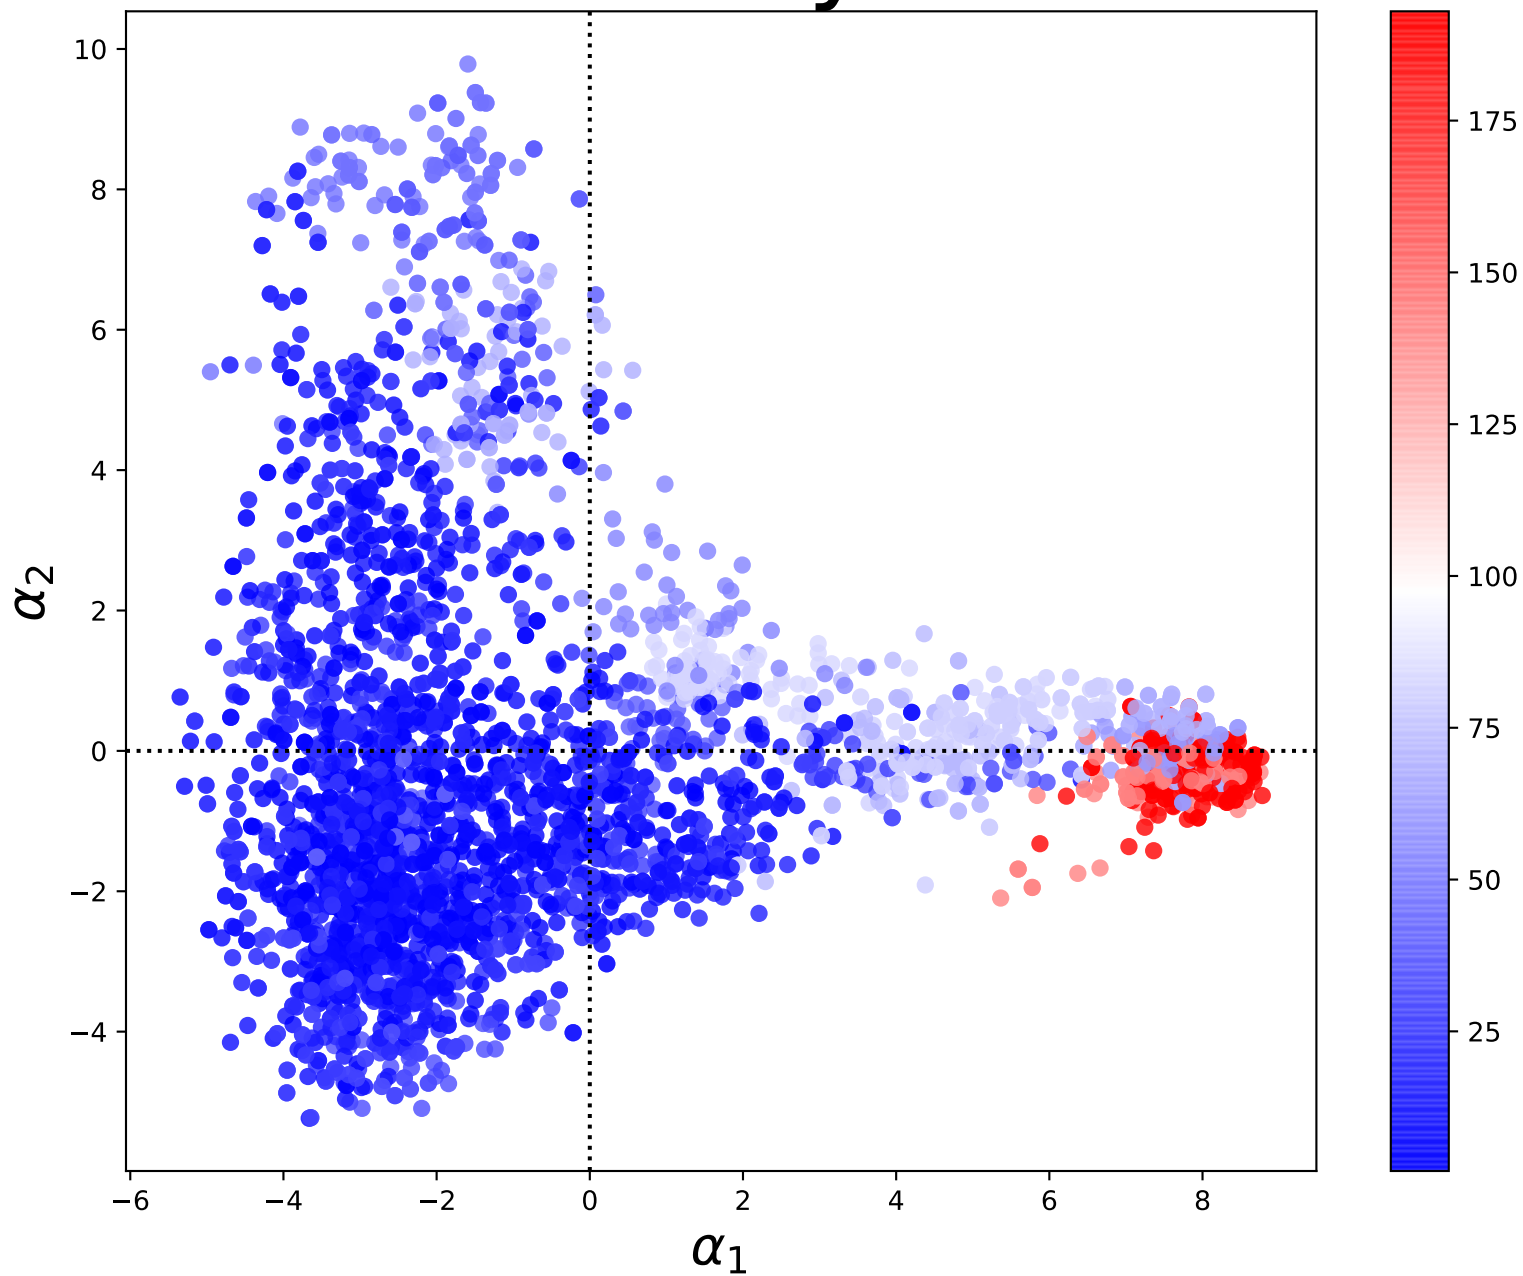

Supplement: OptionalSupplementaryData [file wf_aniso_bert_3.pdf › plots/appendix_plots/wf_aniso_bert_3.pdf]

# BERT Layer 4

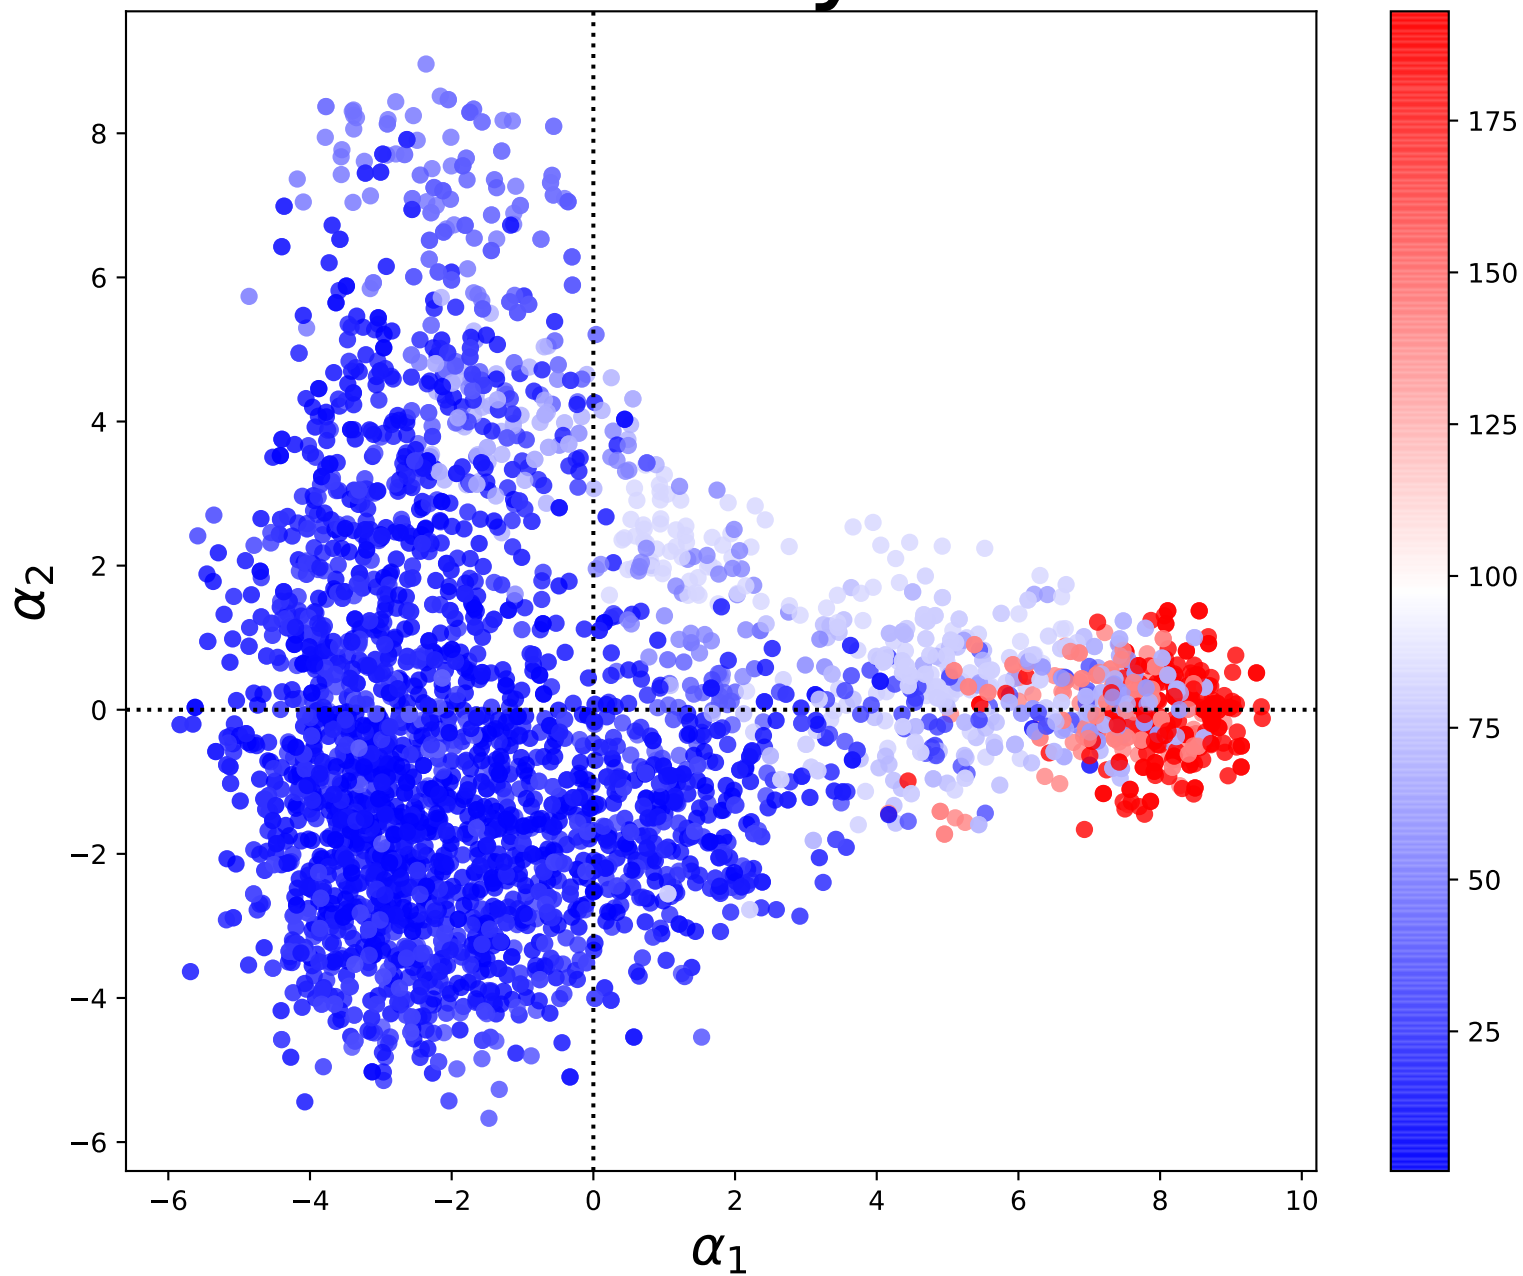

Supplement: OptionalSupplementaryData [file wf_aniso_bert_4.pdf › plots/appendix_plots/wf_aniso_bert_4.pdf]

# BERT Layer 5

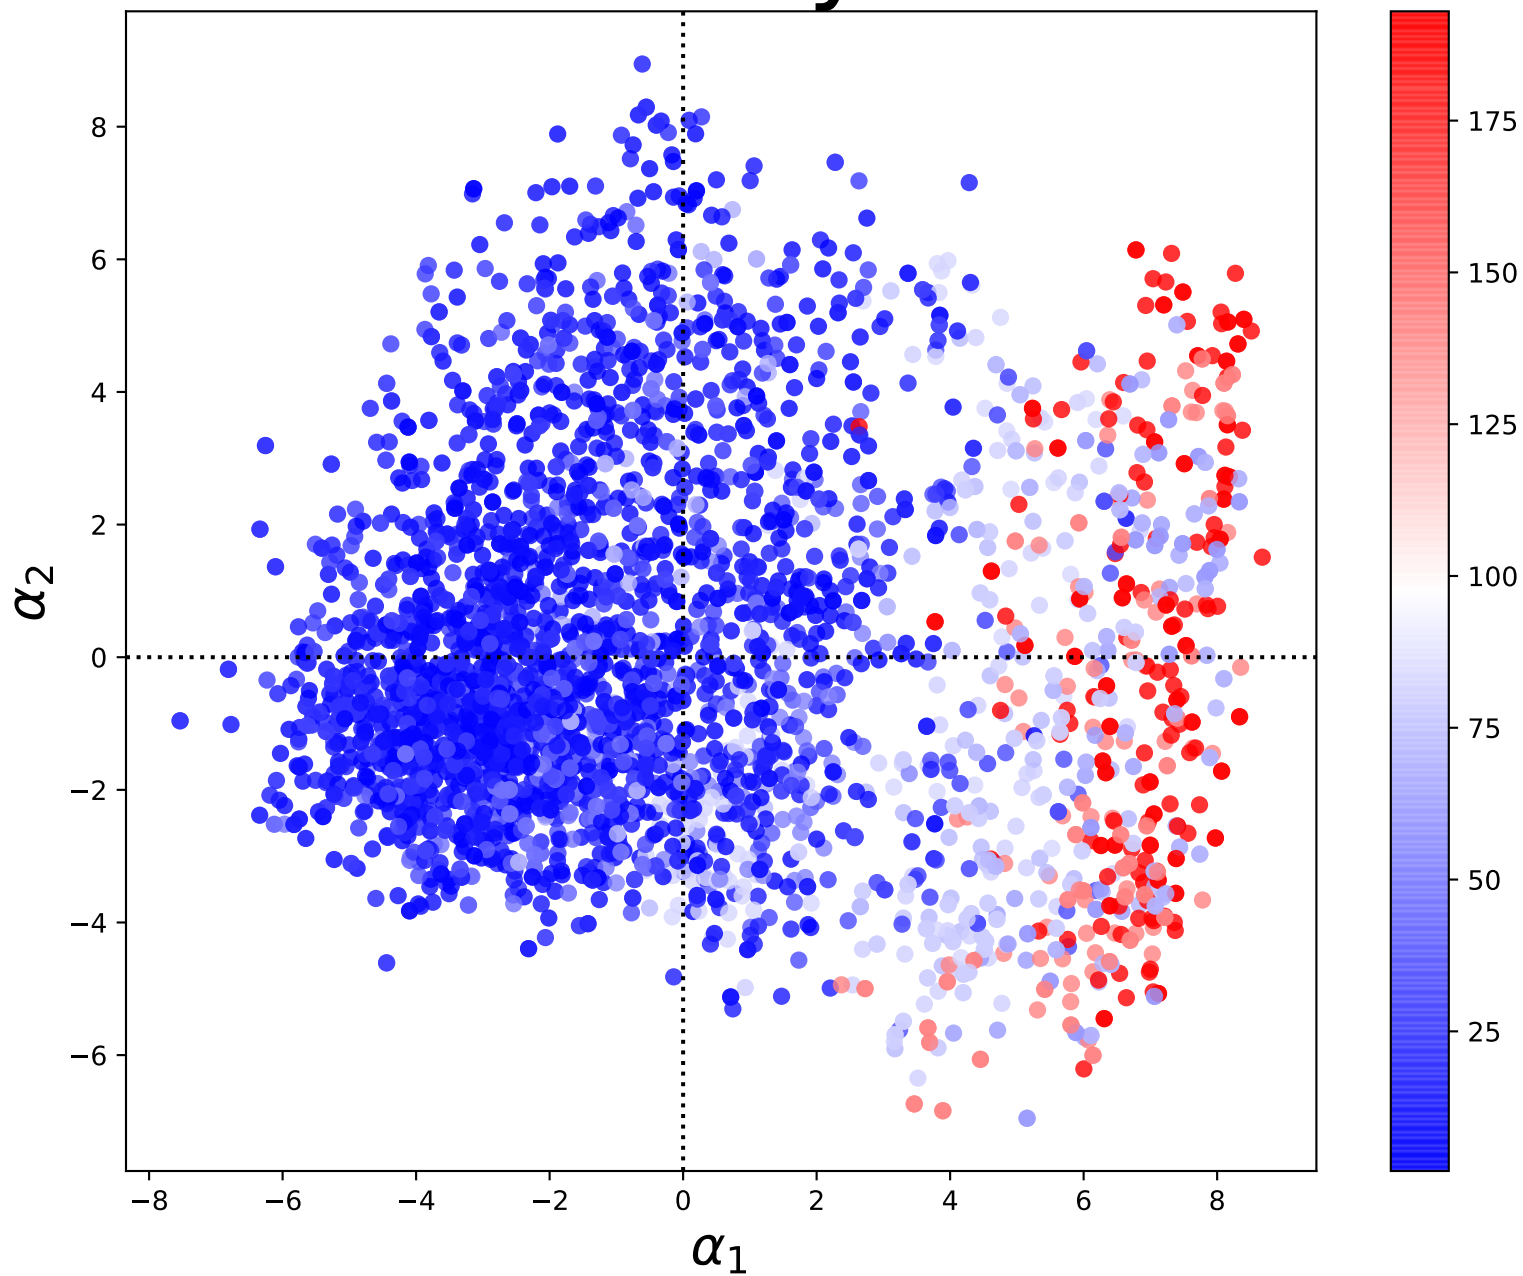

Supplement: OptionalSupplementaryData [file wf_aniso_bert_5.pdf › plots/appendix_plots/wf_aniso_bert_5.pdf]

# BERT Layer 6

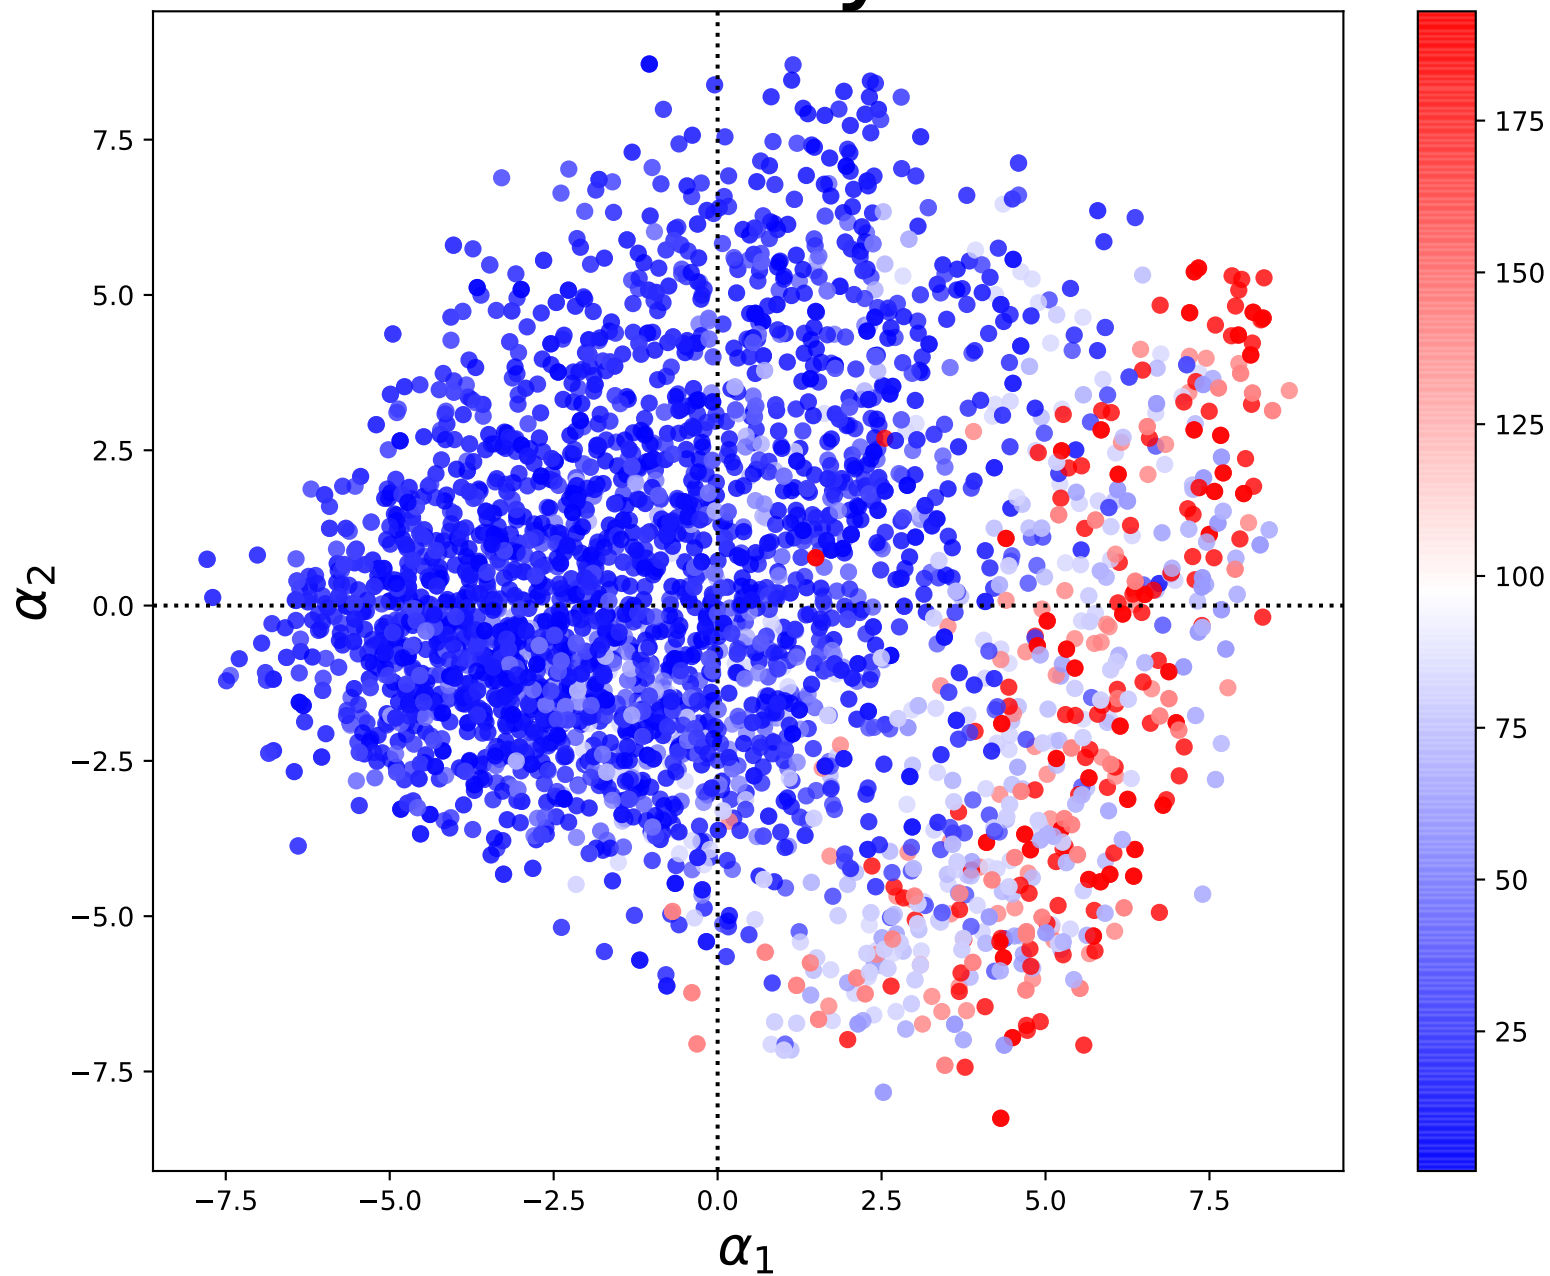

Supplement: OptionalSupplementaryData [file wf_aniso_bert_6.pdf › plots/appendix_plots/wf_aniso_bert_6.pdf]

# BERT Layer 7

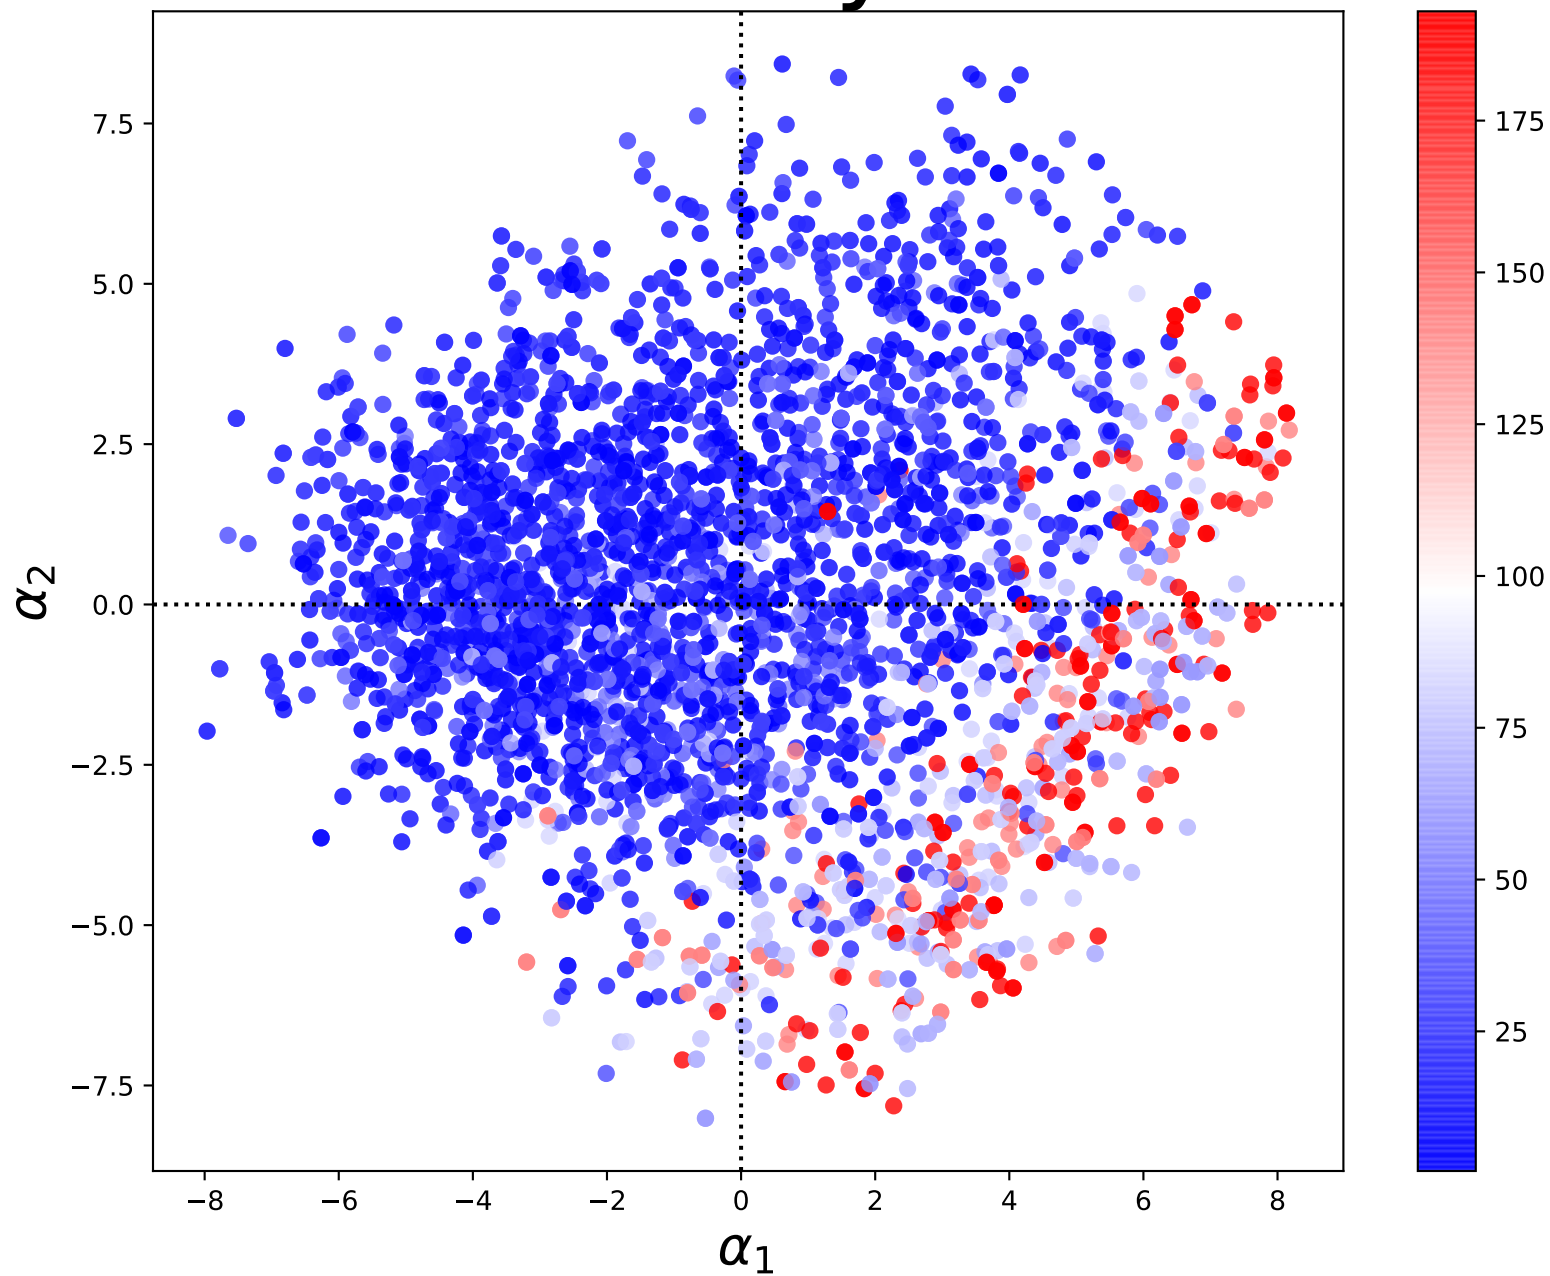

Supplement: OptionalSupplementaryData [file wf_aniso_bert_7.pdf › plots/appendix_plots/wf_aniso_bert_7.pdf]

# BERT Layer 8

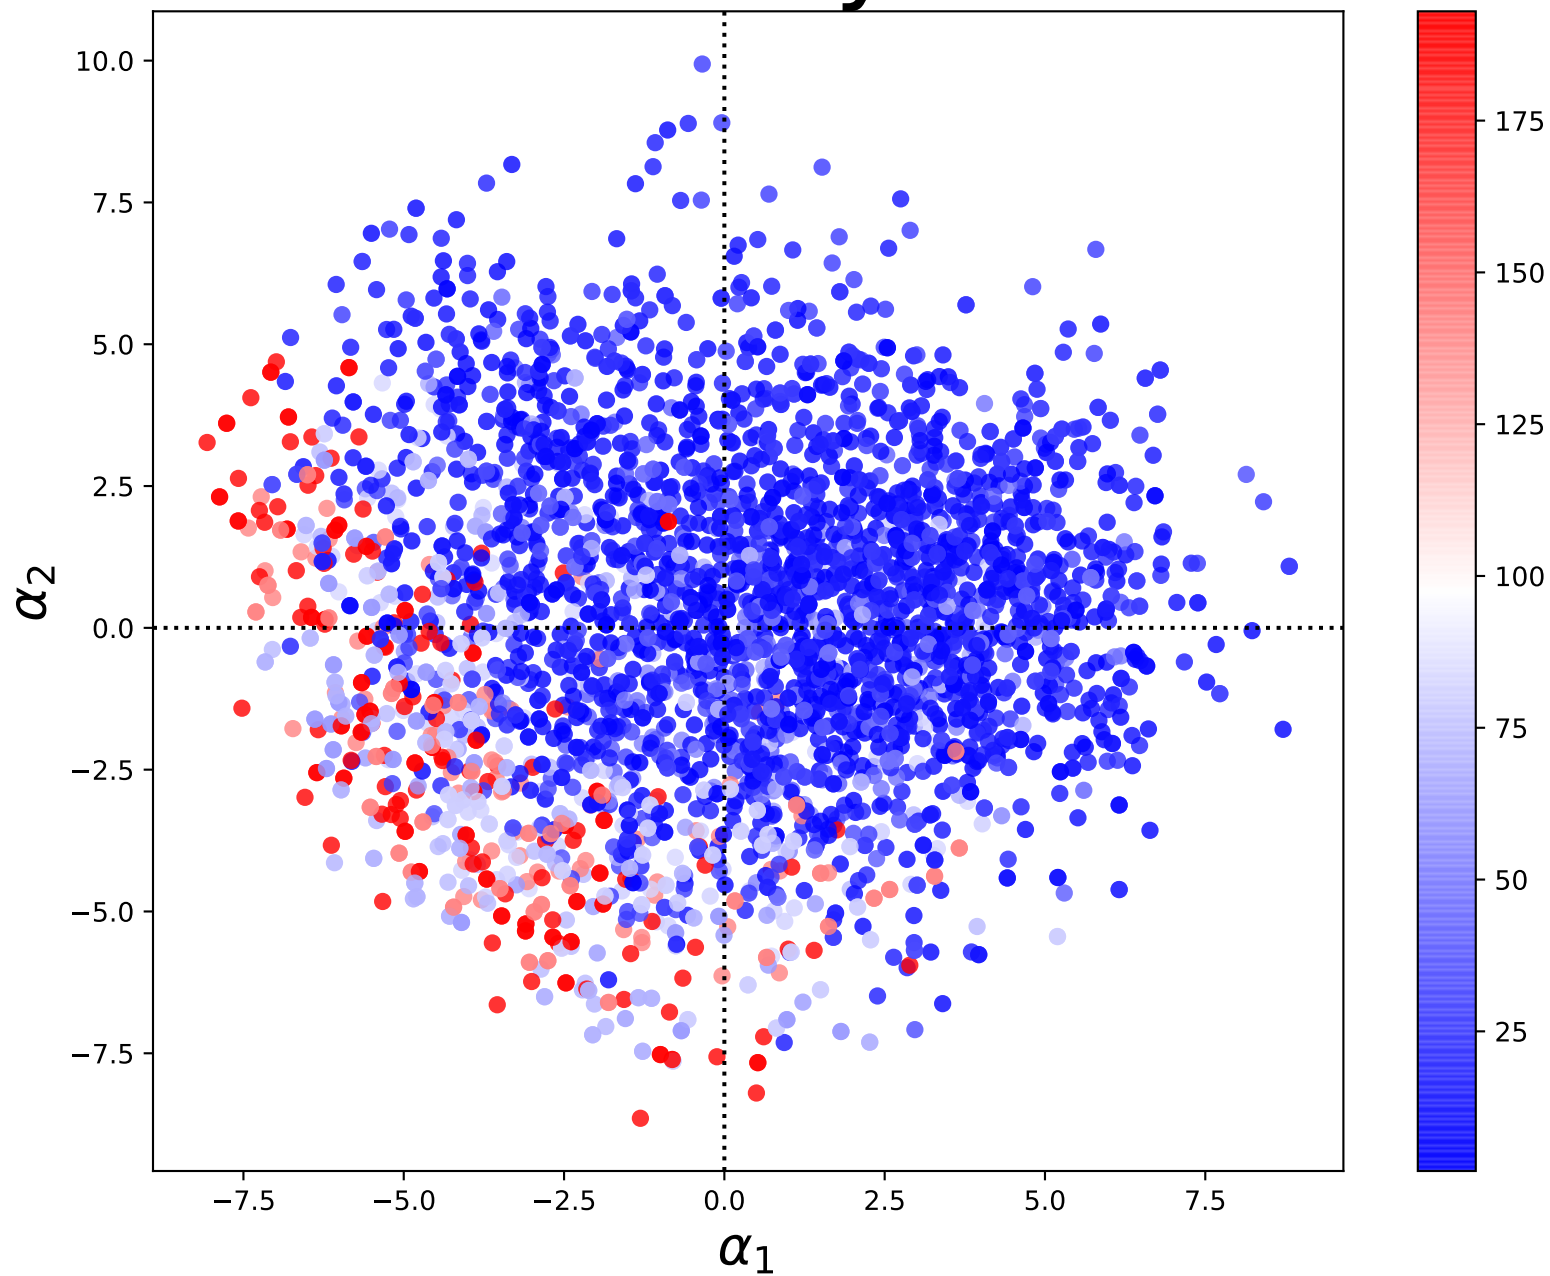

Supplement: OptionalSupplementaryData [file wf_aniso_bert_8.pdf › plots/appendix_plots/wf_aniso_bert_8.pdf]

# BERT Layer 9

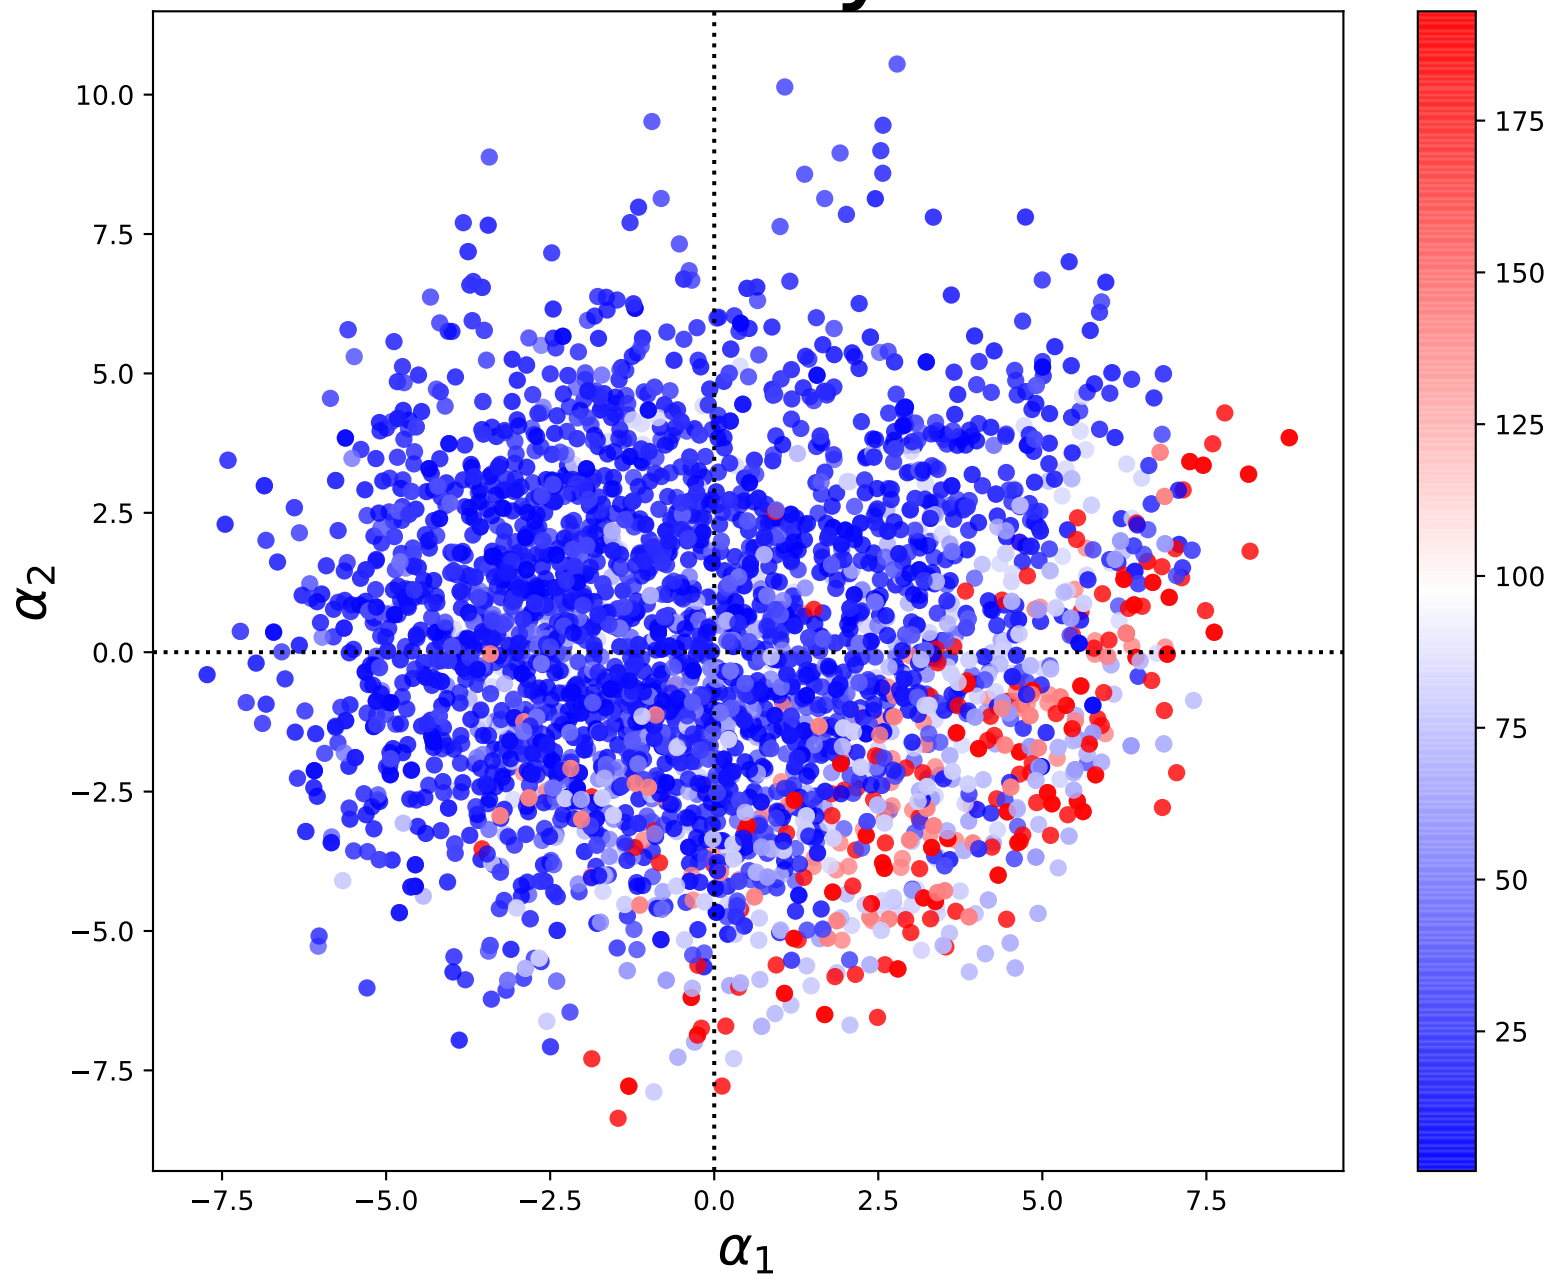

Supplement: OptionalSupplementaryData [file wf_aniso_bert_9.pdf › plots/appendix_plots/wf_aniso_bert_9.pdf]

# ELECTRA Layer 0

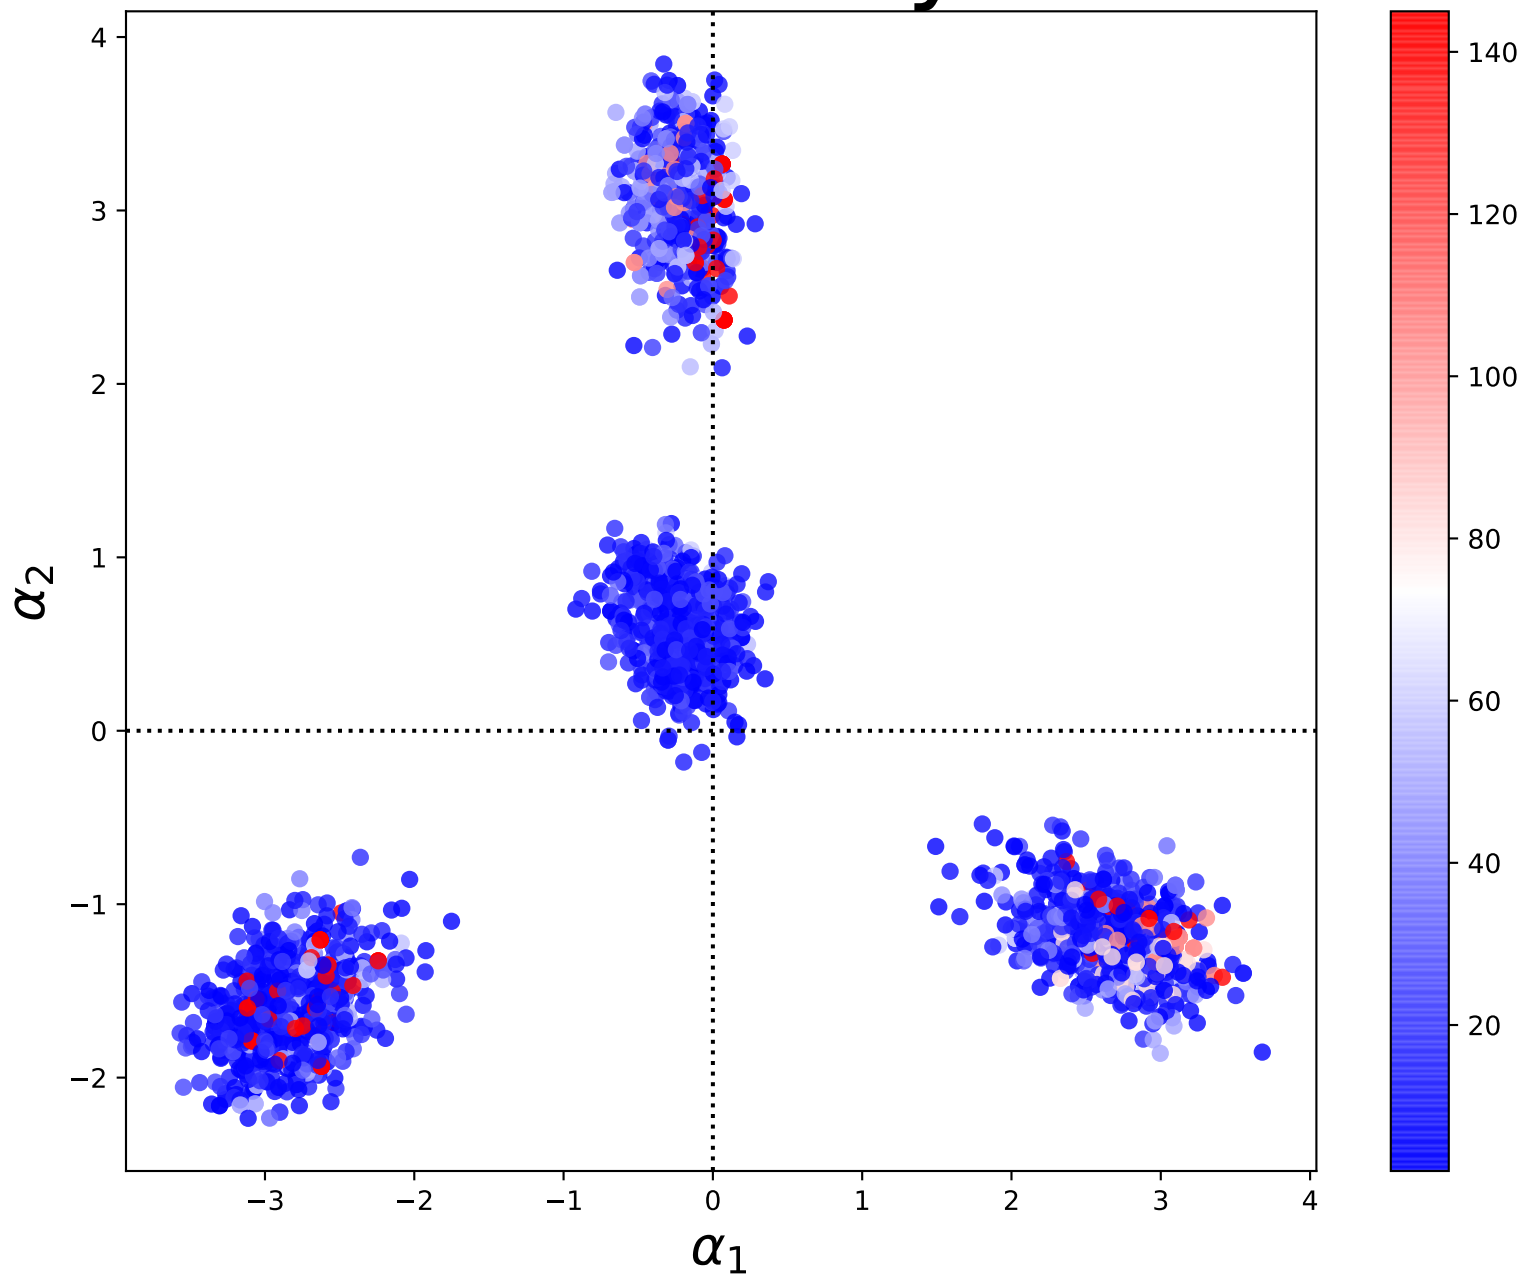

Supplement: OptionalSupplementaryData [file wf_aniso_electra_0.pdf › plots/appendix_plots/wf_aniso_electra_0.pdf]

# ELECTRA Layer 1

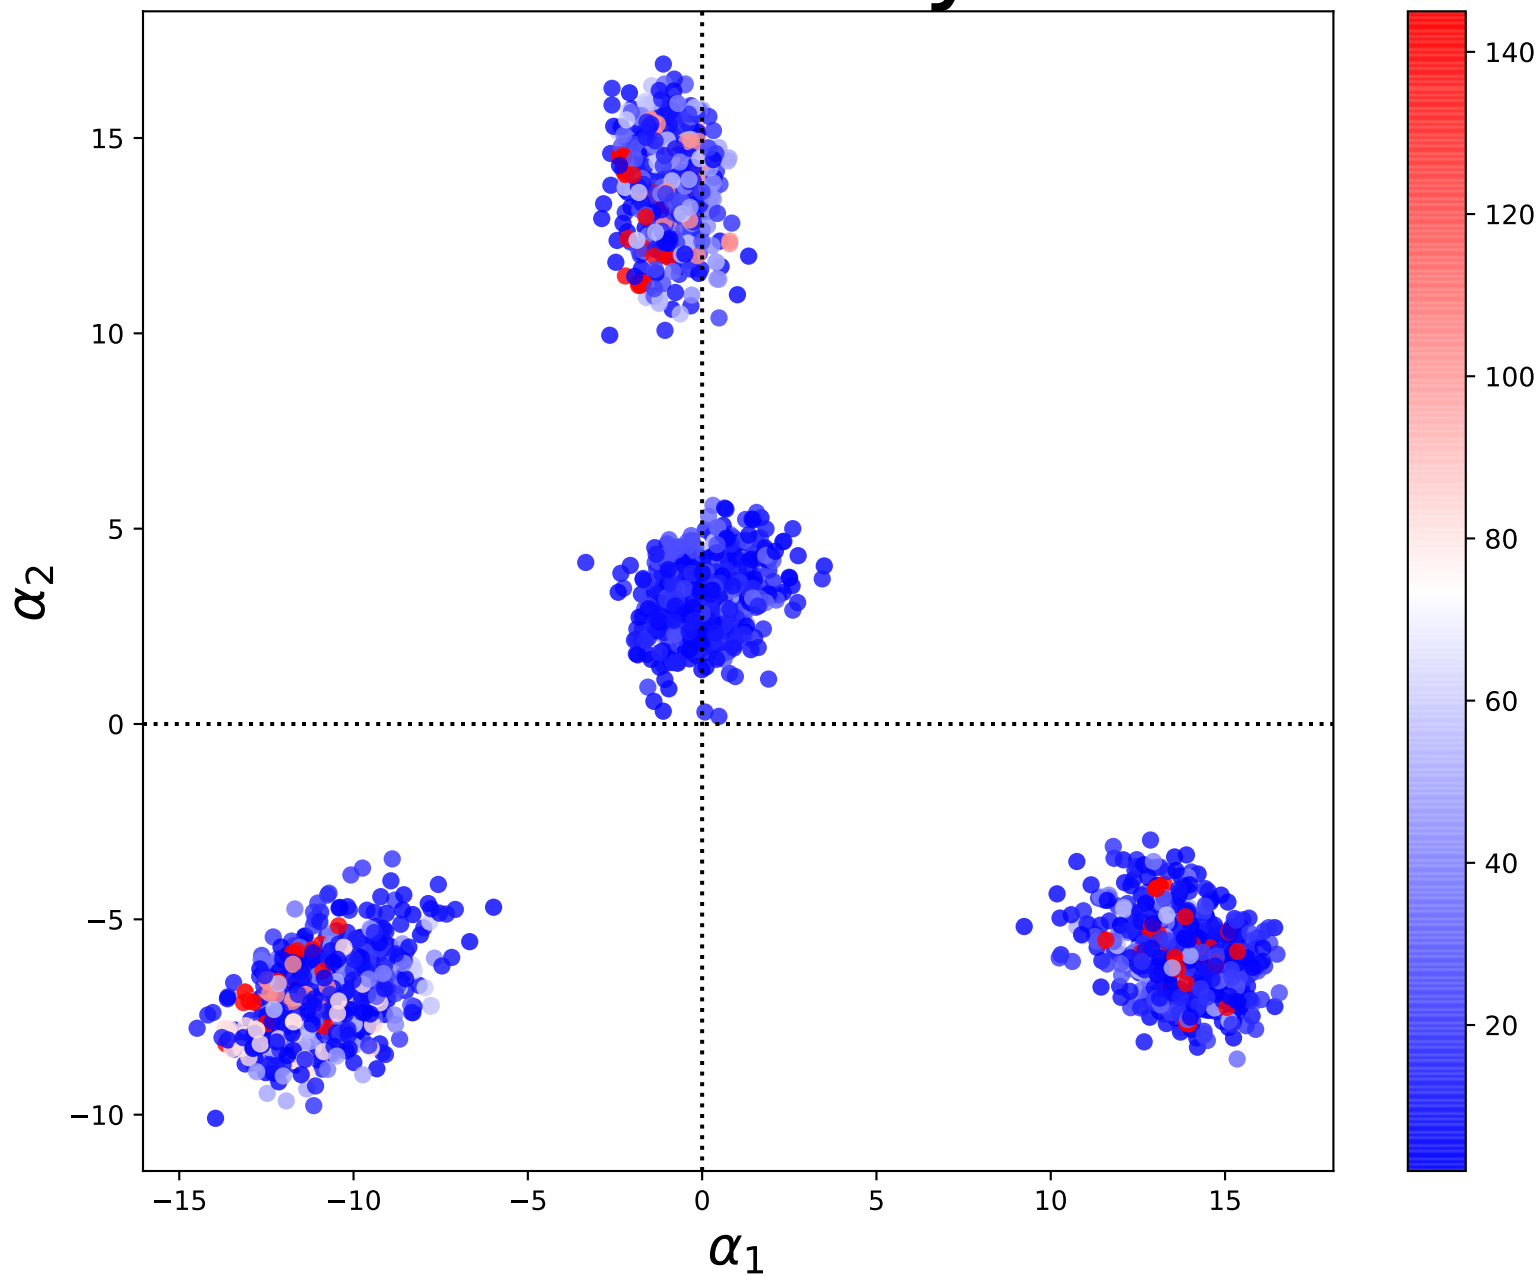

Supplement: OptionalSupplementaryData [file wf_aniso_electra_1.pdf › plots/appendix_plots/wf_aniso_electra_1.pdf]

# ELECTRA Layer 10

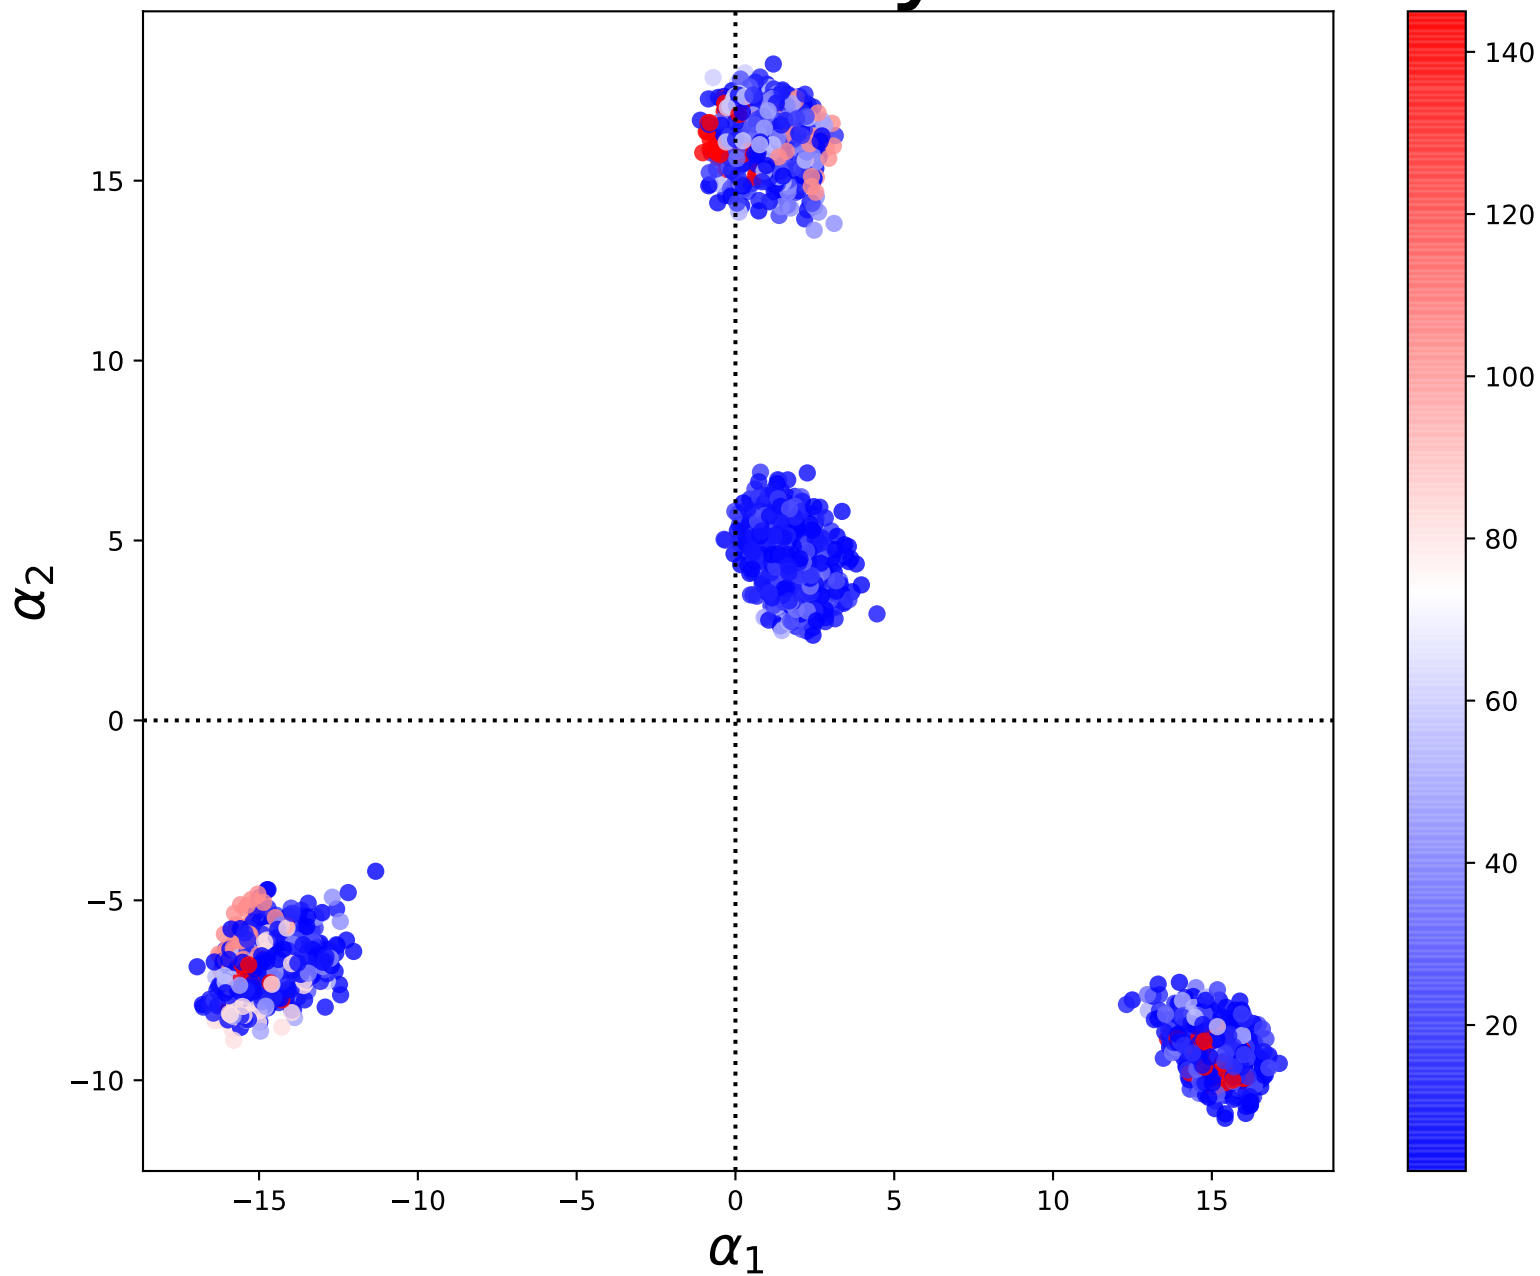

Supplement: OptionalSupplementaryData [file wf_aniso_electra_10.pdf › plots/appendix_plots/wf_aniso_electra_10.pdf]

# ELECTRA Layer 11

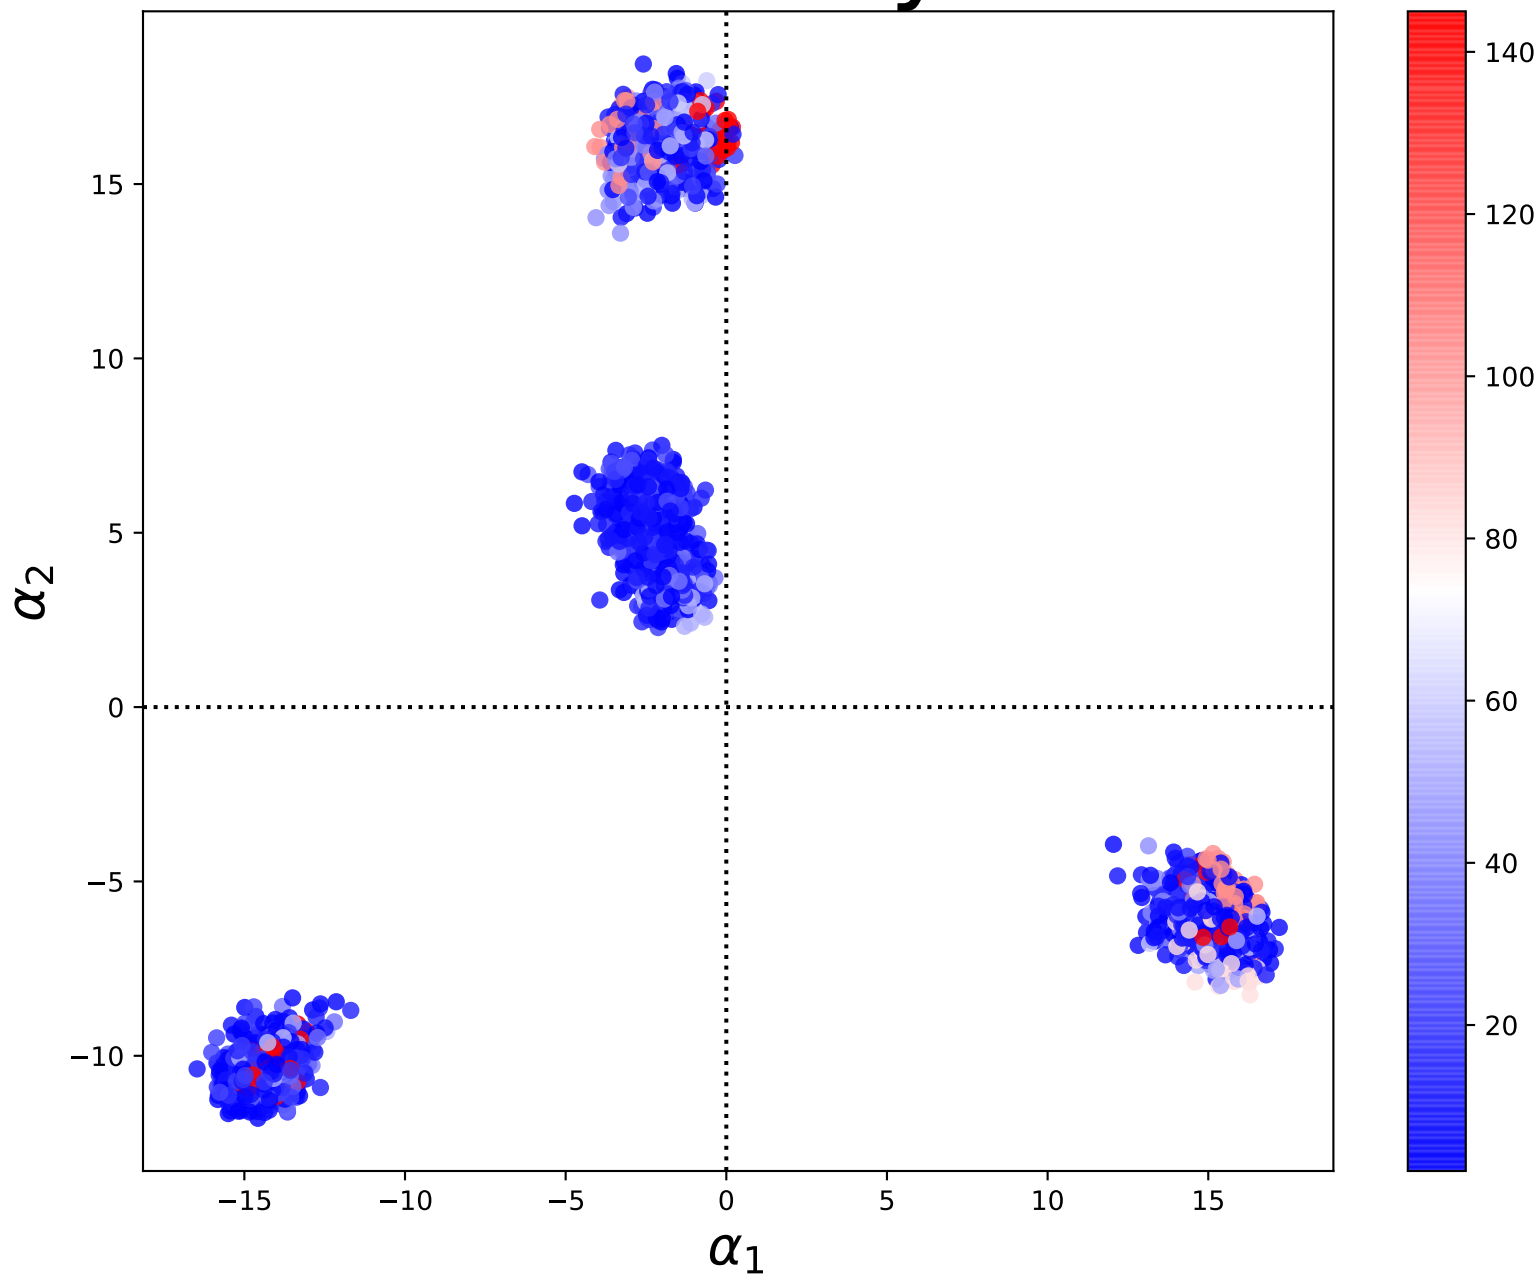

Supplement: OptionalSupplementaryData [file wf_aniso_electra_11.pdf › plots/appendix_plots/wf_aniso_electra_11.pdf]

# ELECTRA Layer 12

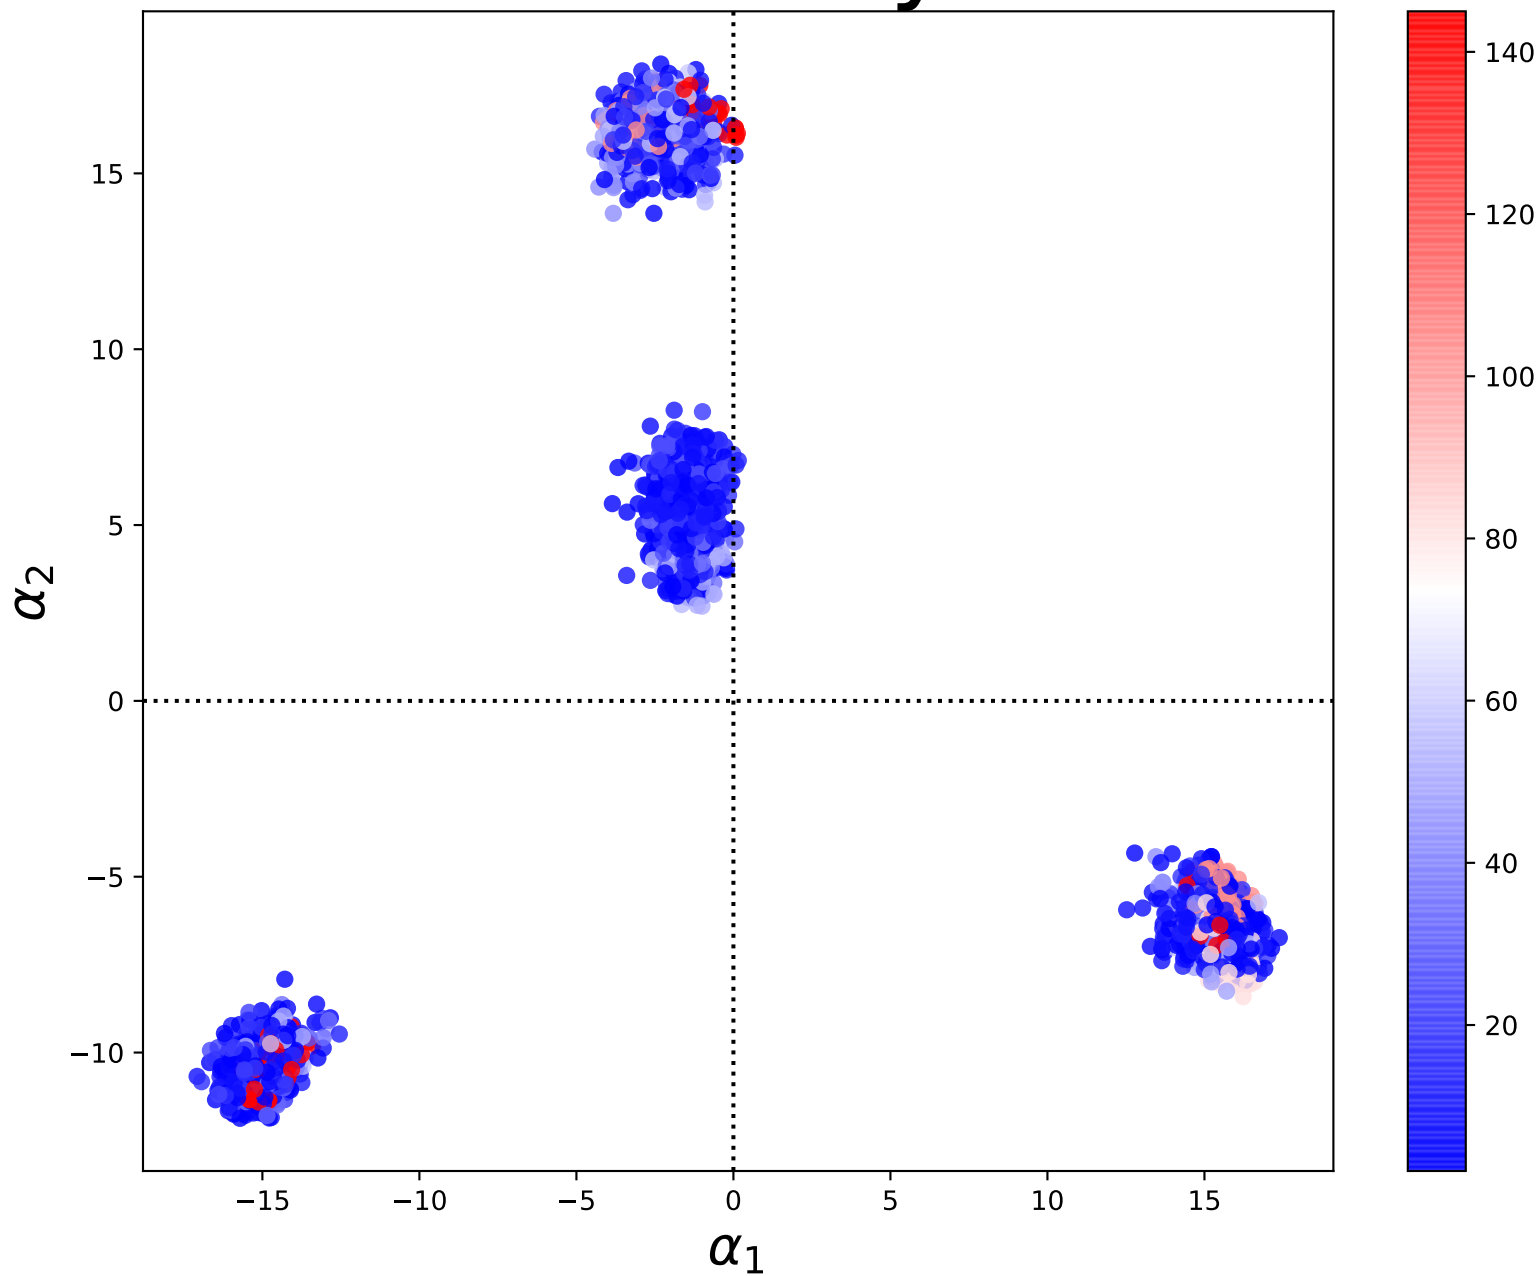

Supplement: OptionalSupplementaryData [file wf_aniso_electra_12.pdf › plots/appendix_plots/wf_aniso_electra_12.pdf]

# ELECTRA Layer 2

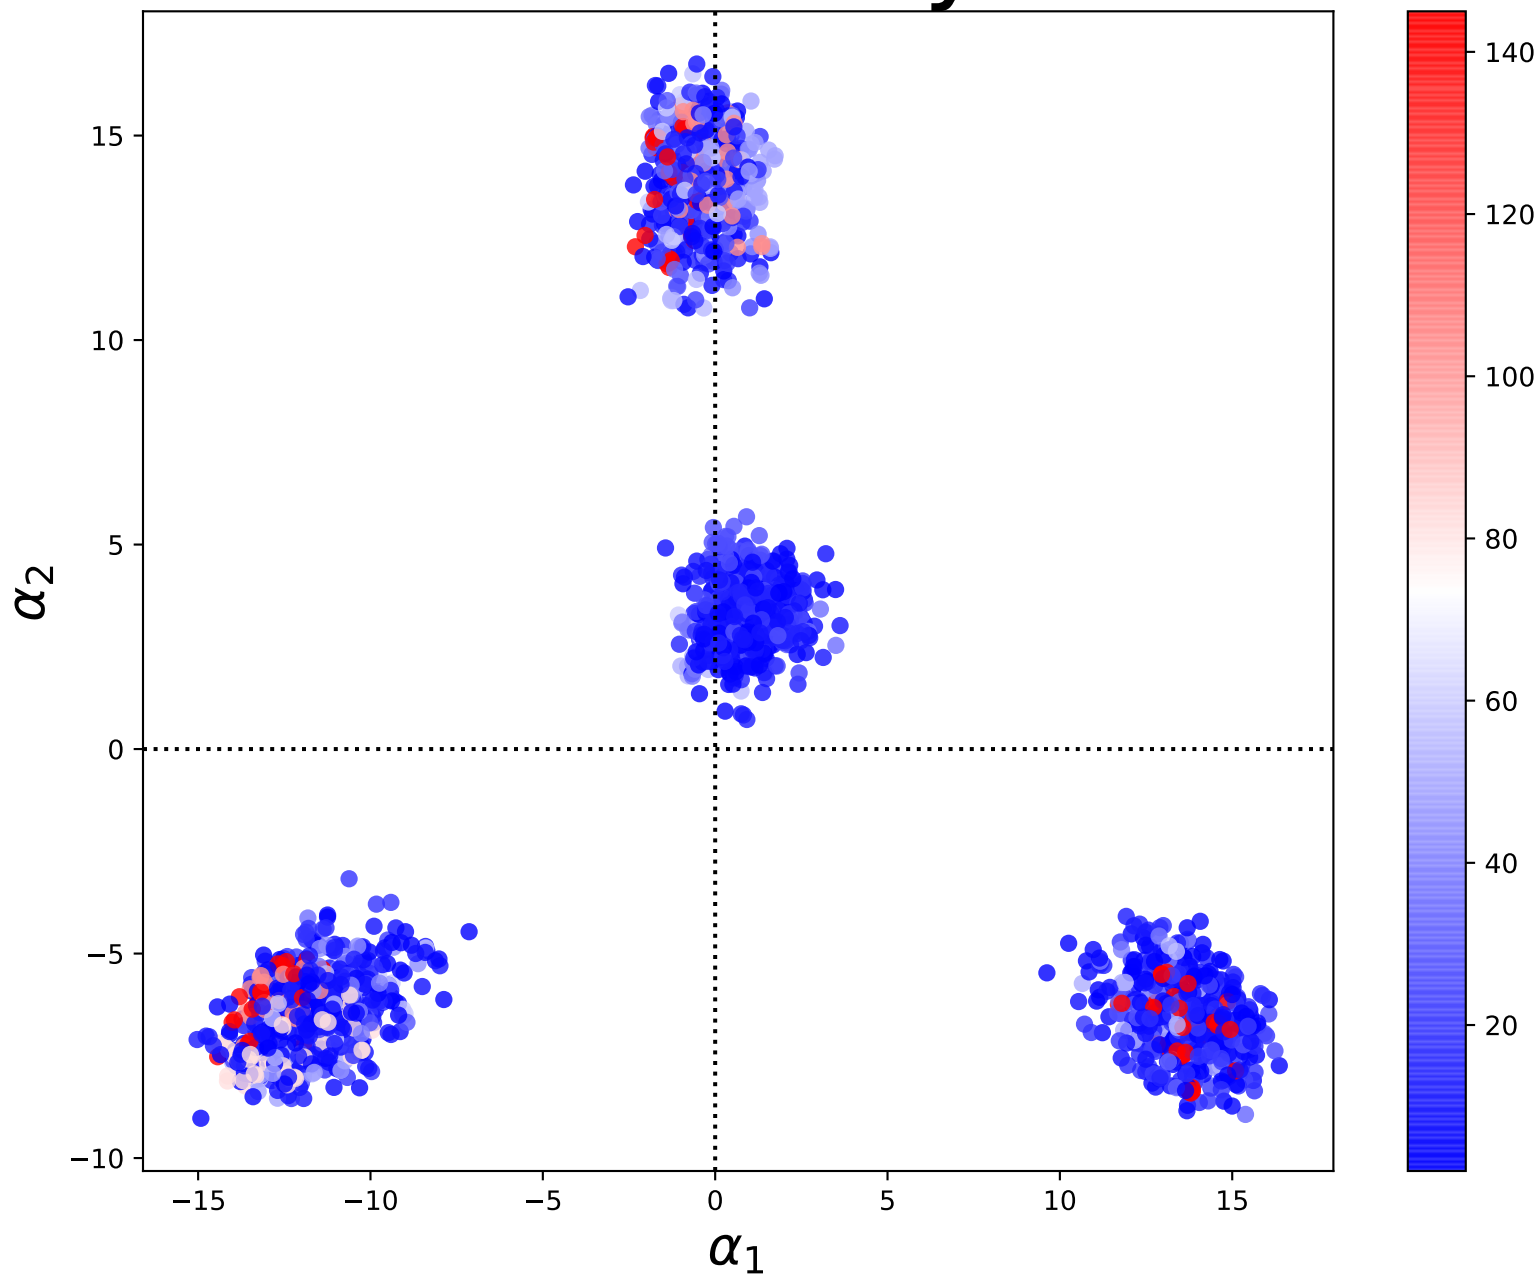

Supplement: OptionalSupplementaryData [file wf_aniso_electra_2.pdf › plots/appendix_plots/wf_aniso_electra_2.pdf]

# ELECTRA Layer 3

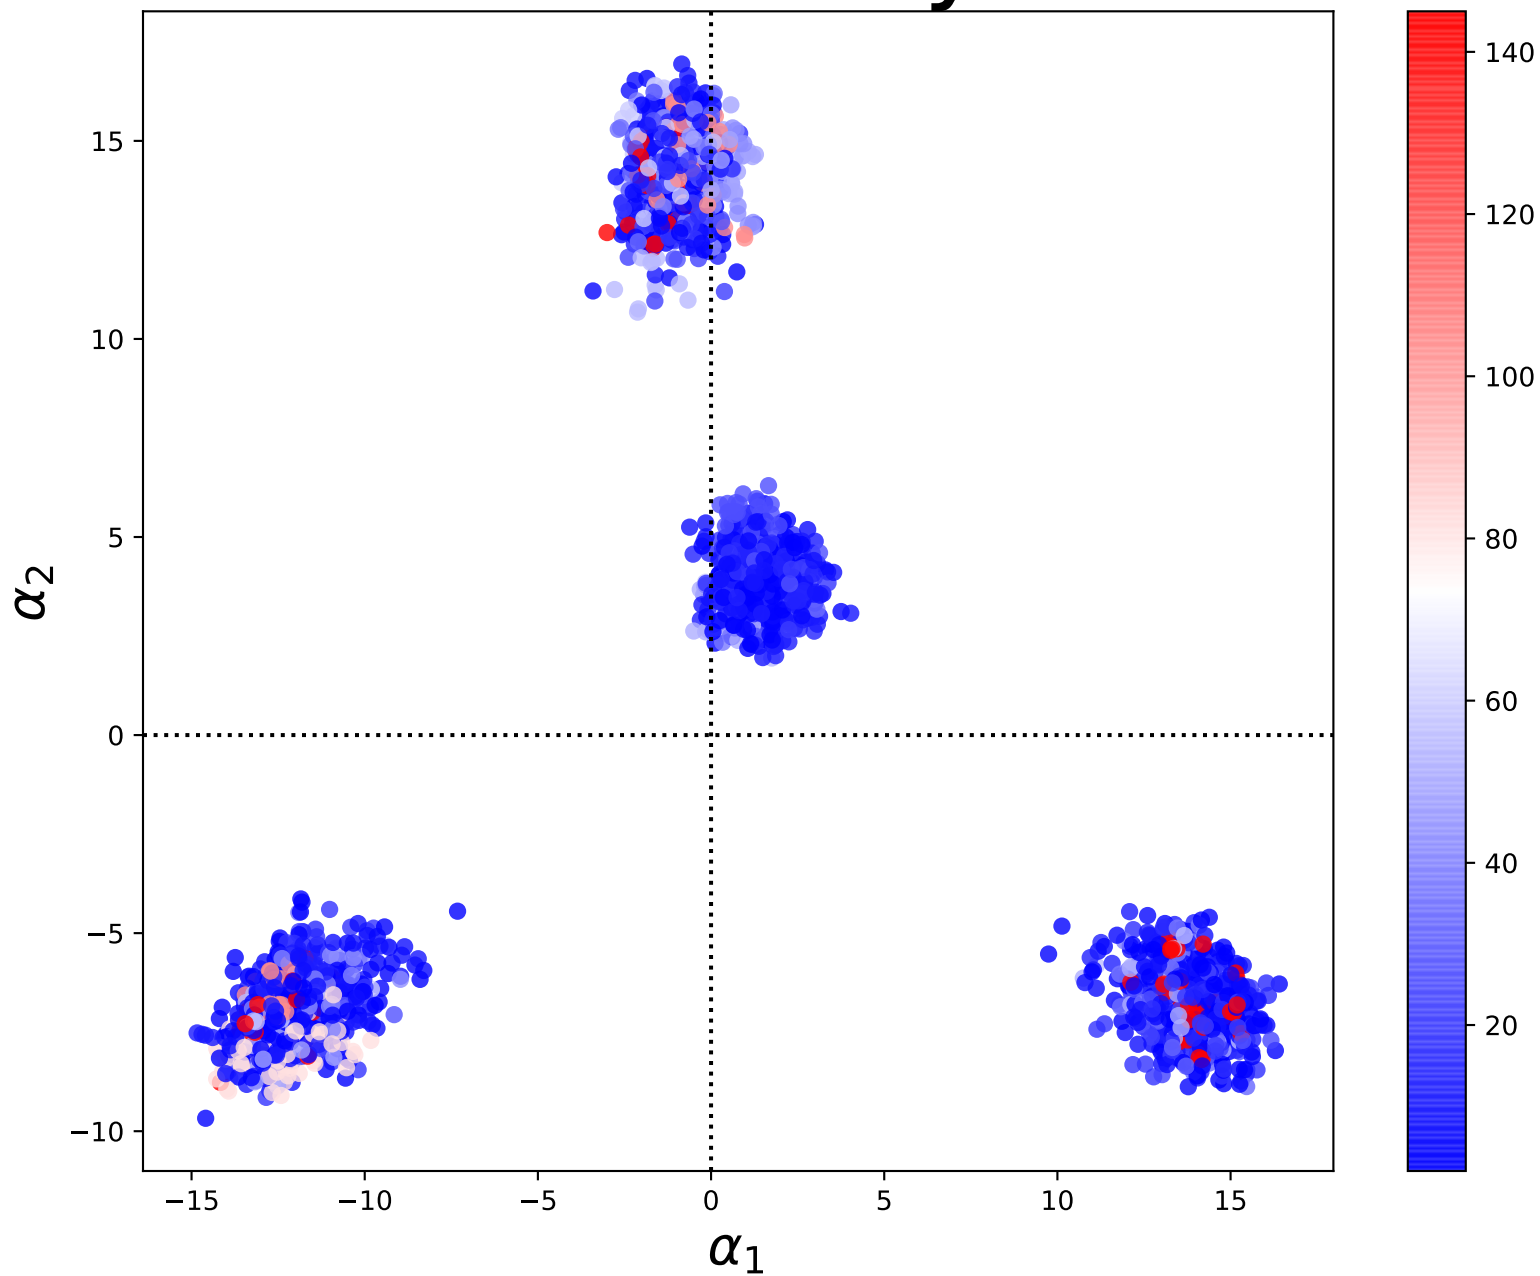

Supplement: OptionalSupplementaryData [file wf_aniso_electra_3.pdf › plots/appendix_plots/wf_aniso_electra_3.pdf]

# ELECTRA Layer 4

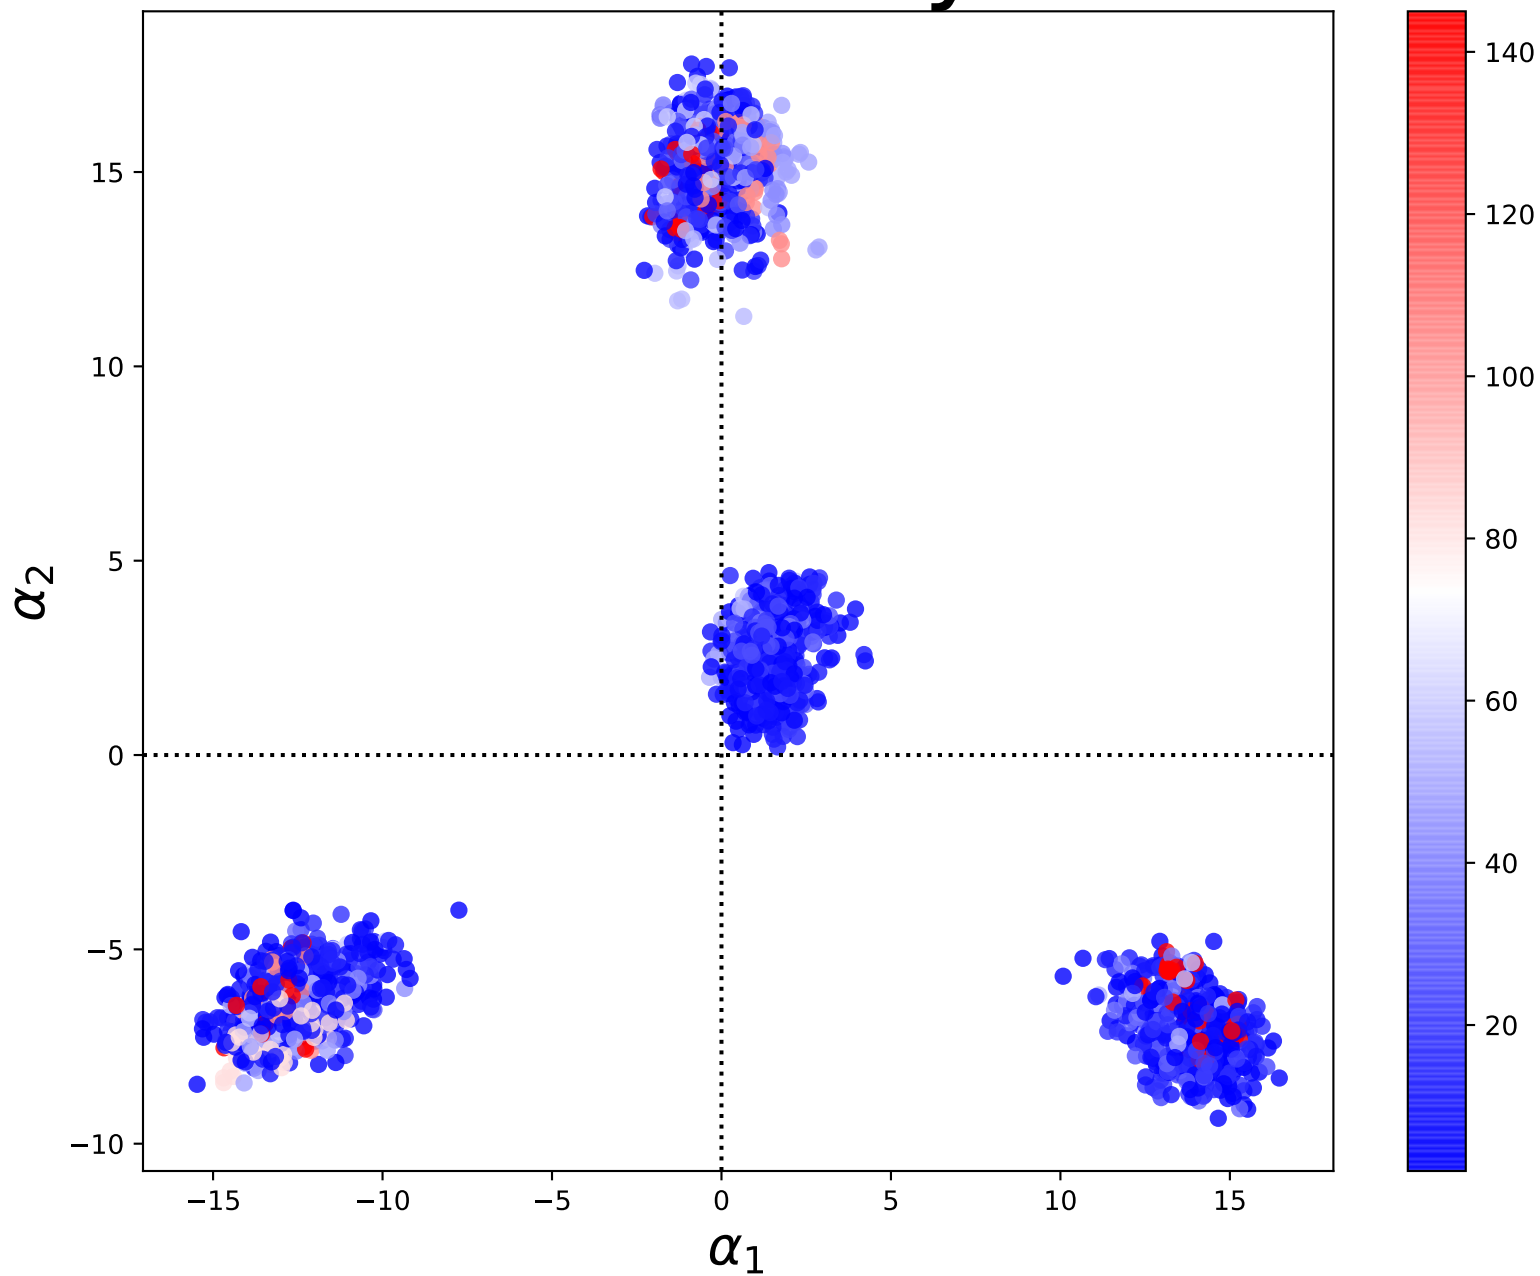

Supplement: OptionalSupplementaryData [file wf_aniso_electra_4.pdf › plots/appendix_plots/wf_aniso_electra_4.pdf]

# ELECTRA Layer 5

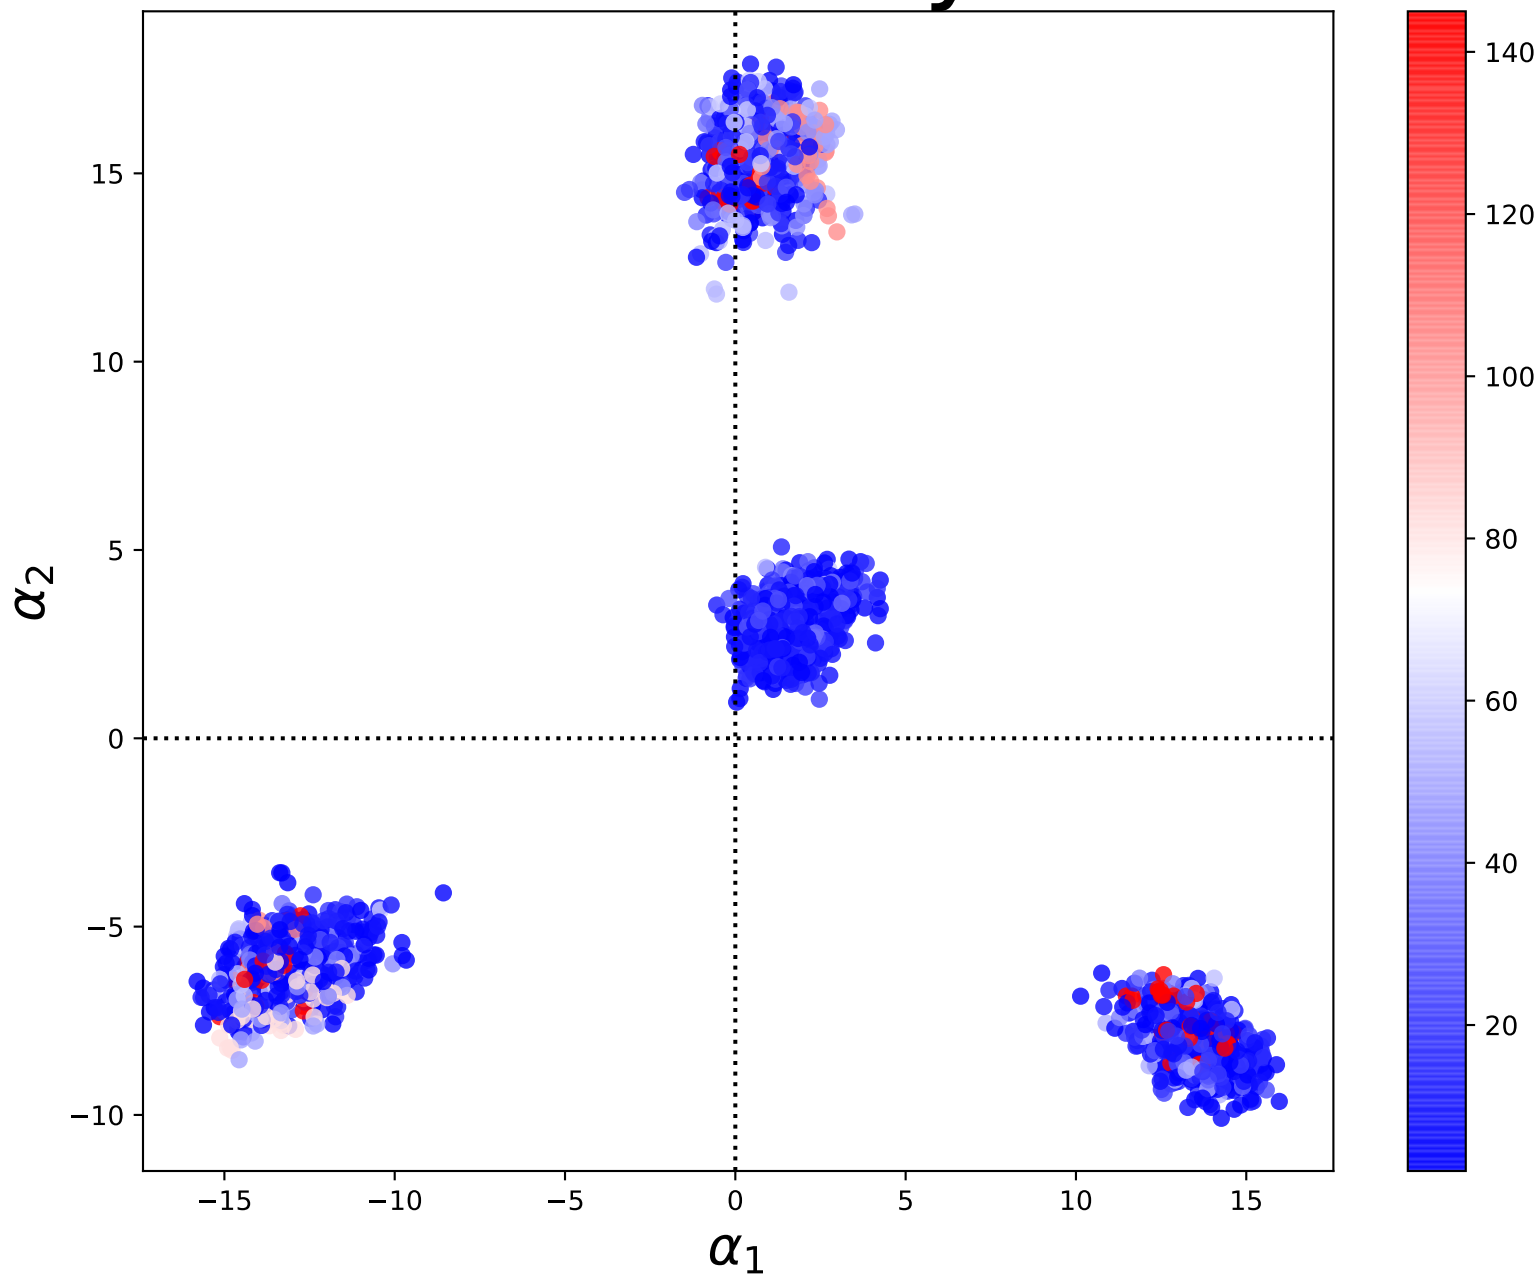

Supplement: OptionalSupplementaryData [file wf_aniso_electra_5.pdf › plots/appendix_plots/wf_aniso_electra_5.pdf]

# ELECTRA Layer 6

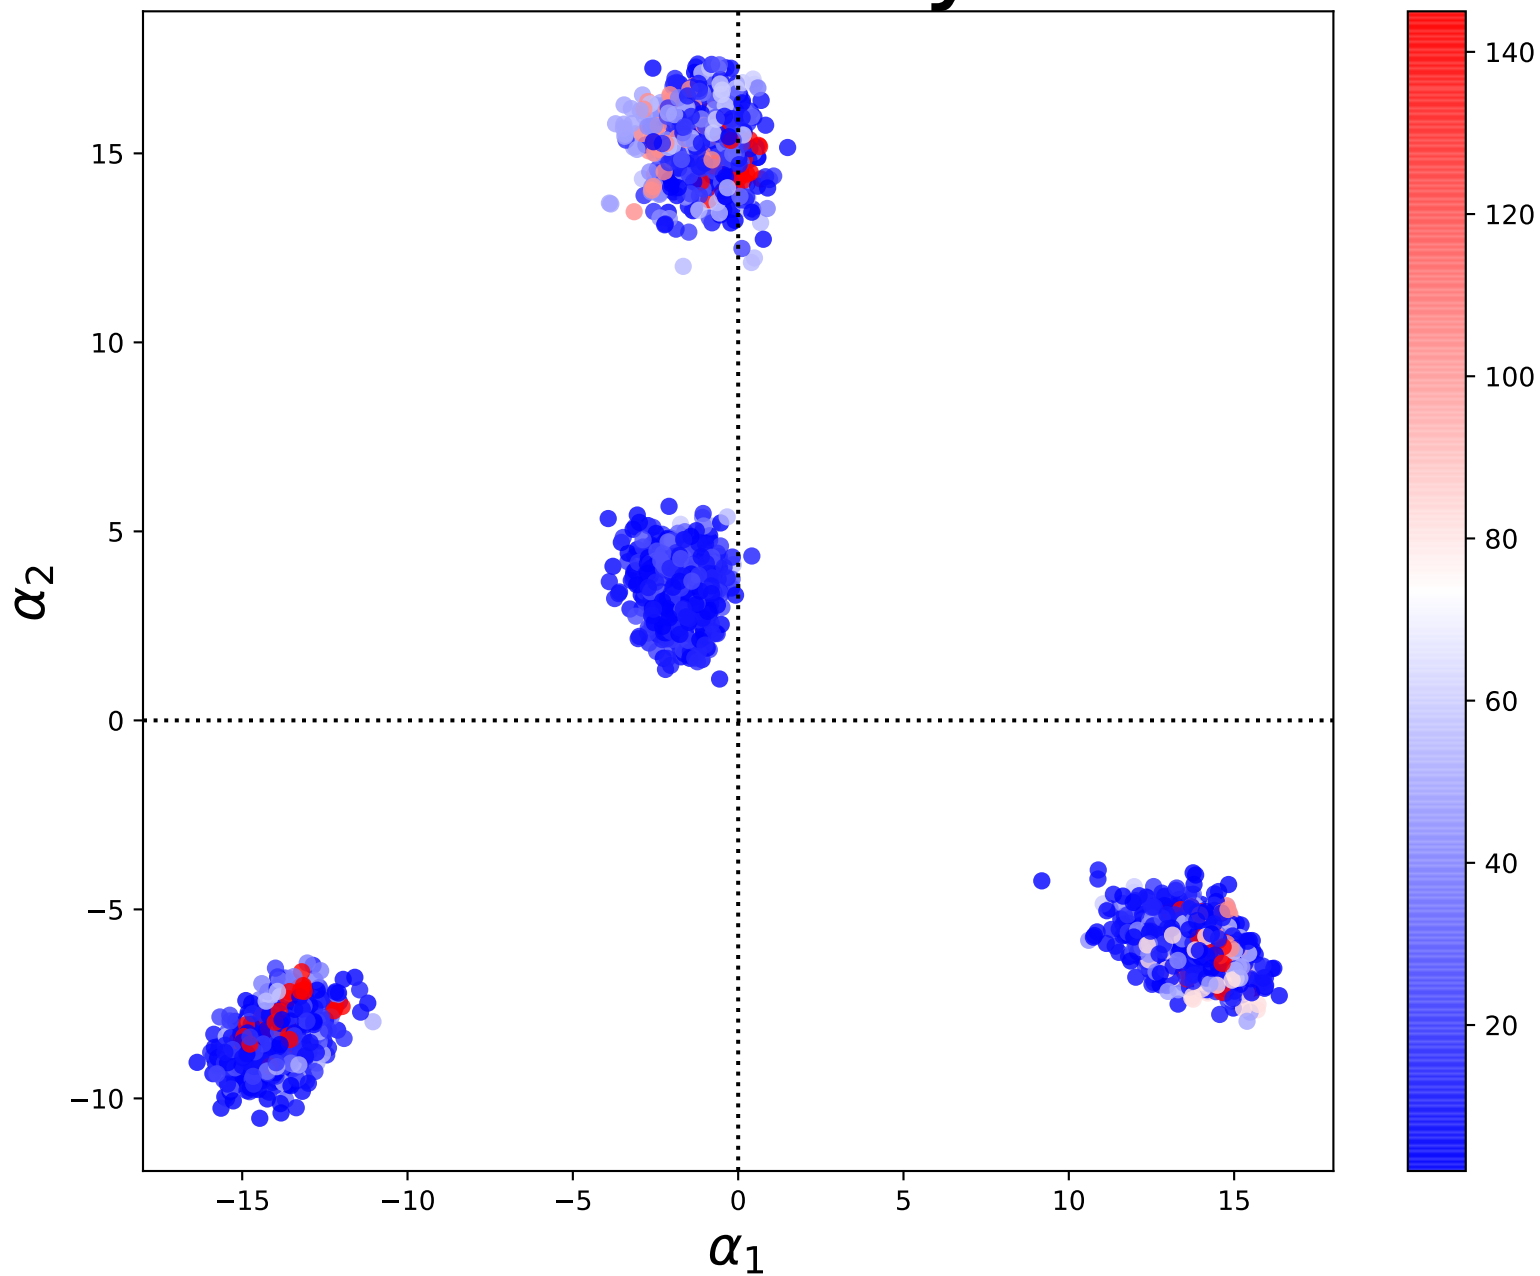

Supplement: OptionalSupplementaryData [file wf_aniso_electra_6.pdf › plots/appendix_plots/wf_aniso_electra_6.pdf]

# ELECTRA Layer 7

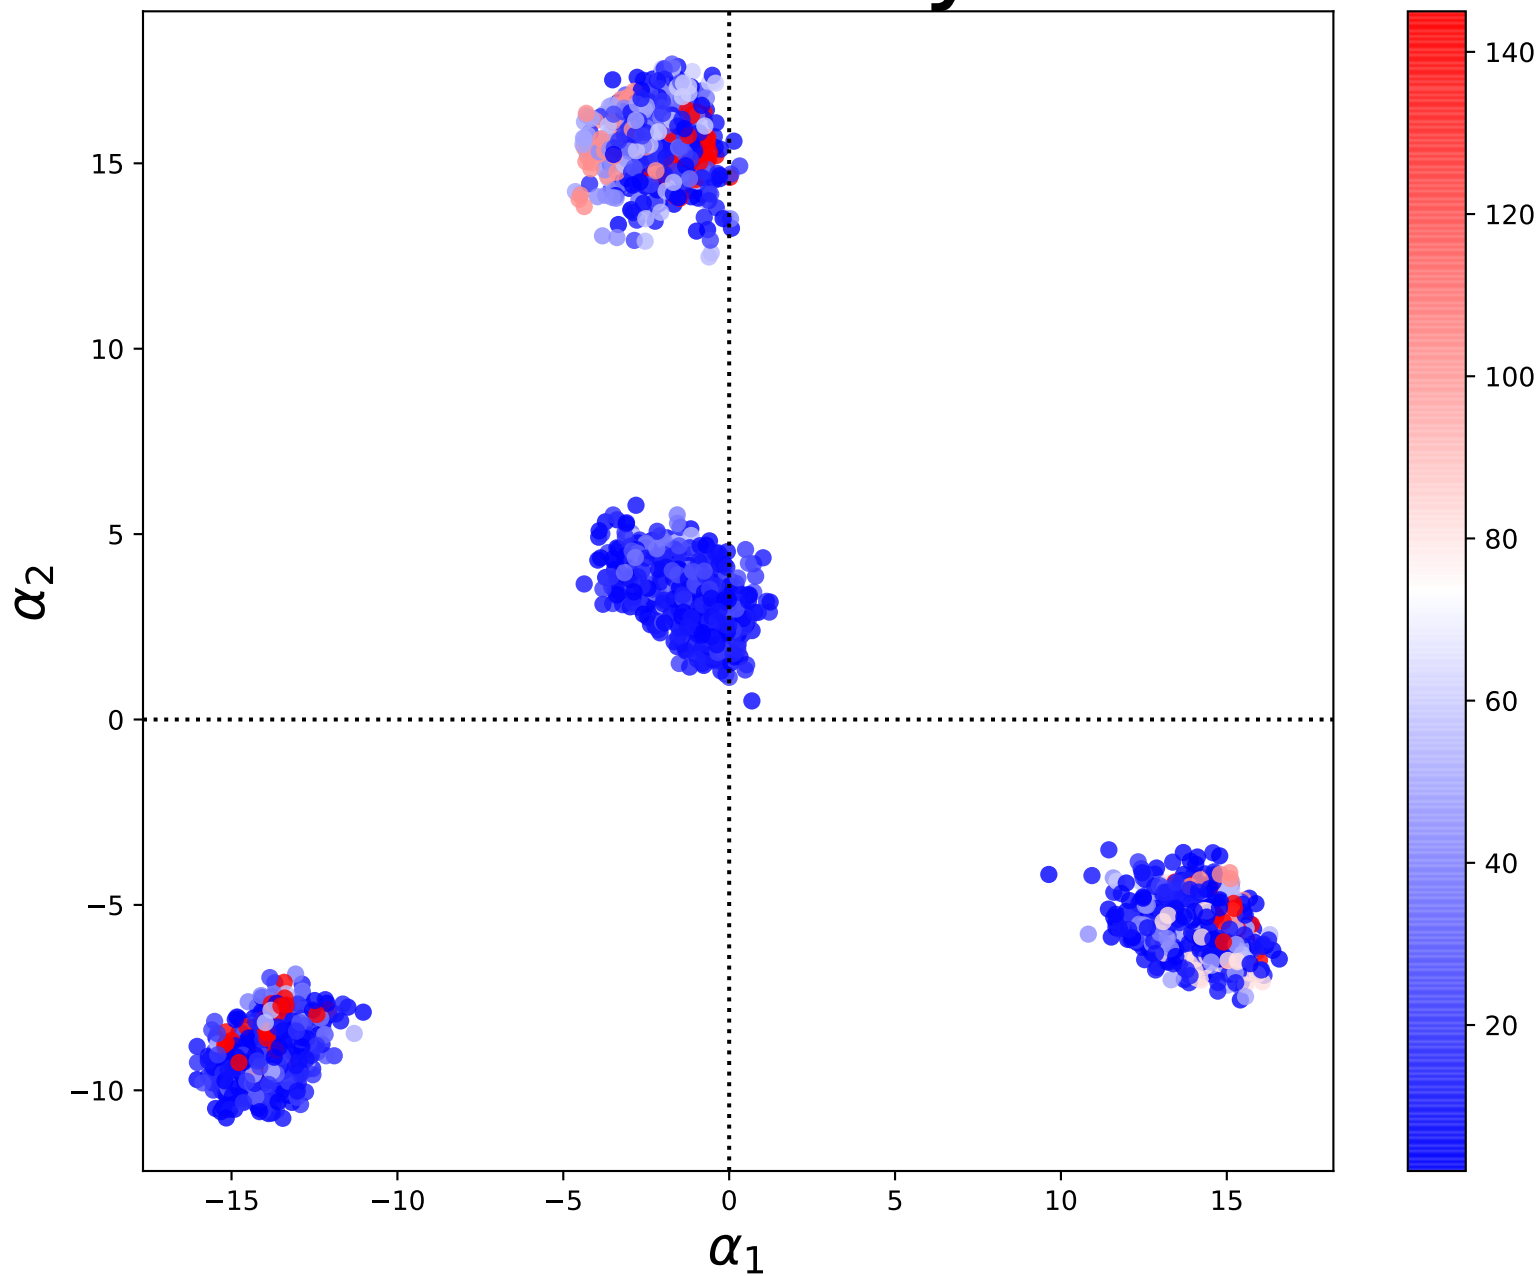

Supplement: OptionalSupplementaryData [file wf_aniso_electra_7.pdf › plots/appendix_plots/wf_aniso_electra_7.pdf]

# ELECTRA Layer 8

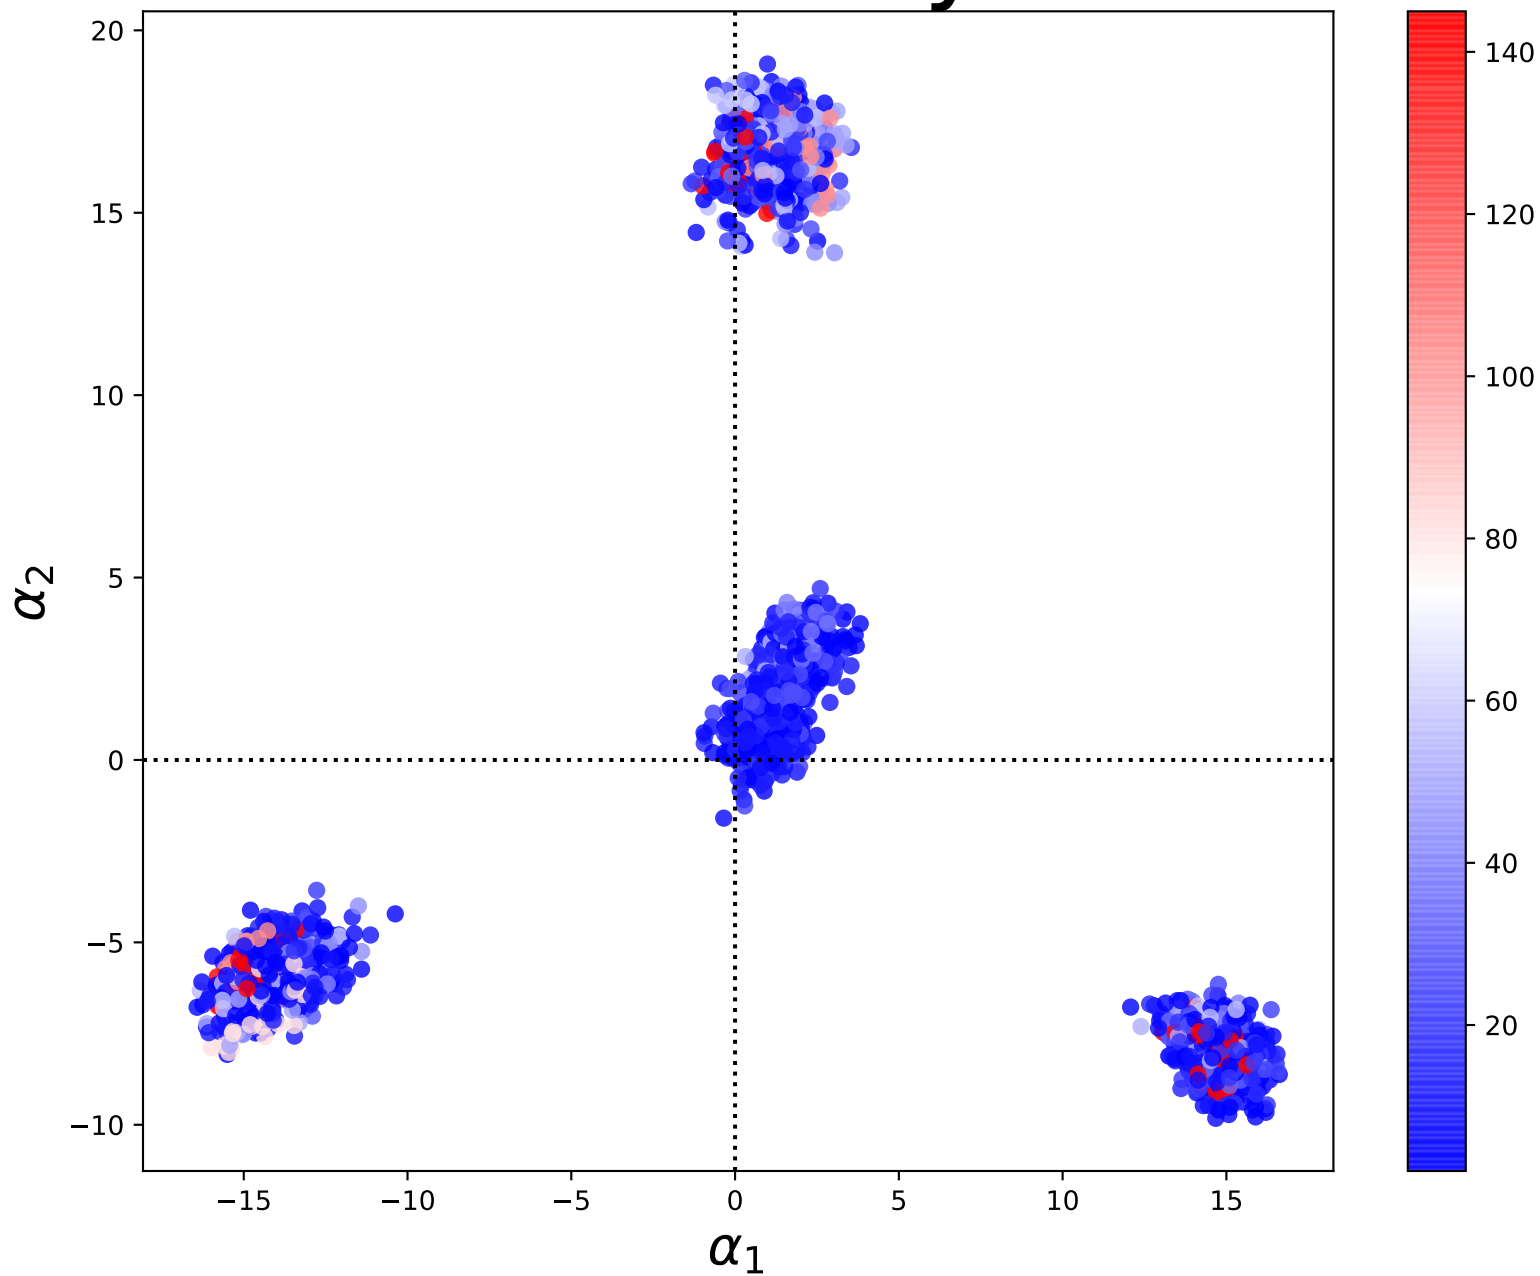

Supplement: OptionalSupplementaryData [file wf_aniso_electra_8.pdf › plots/appendix_plots/wf_aniso_electra_8.pdf]

# ELECTRA Layer 9

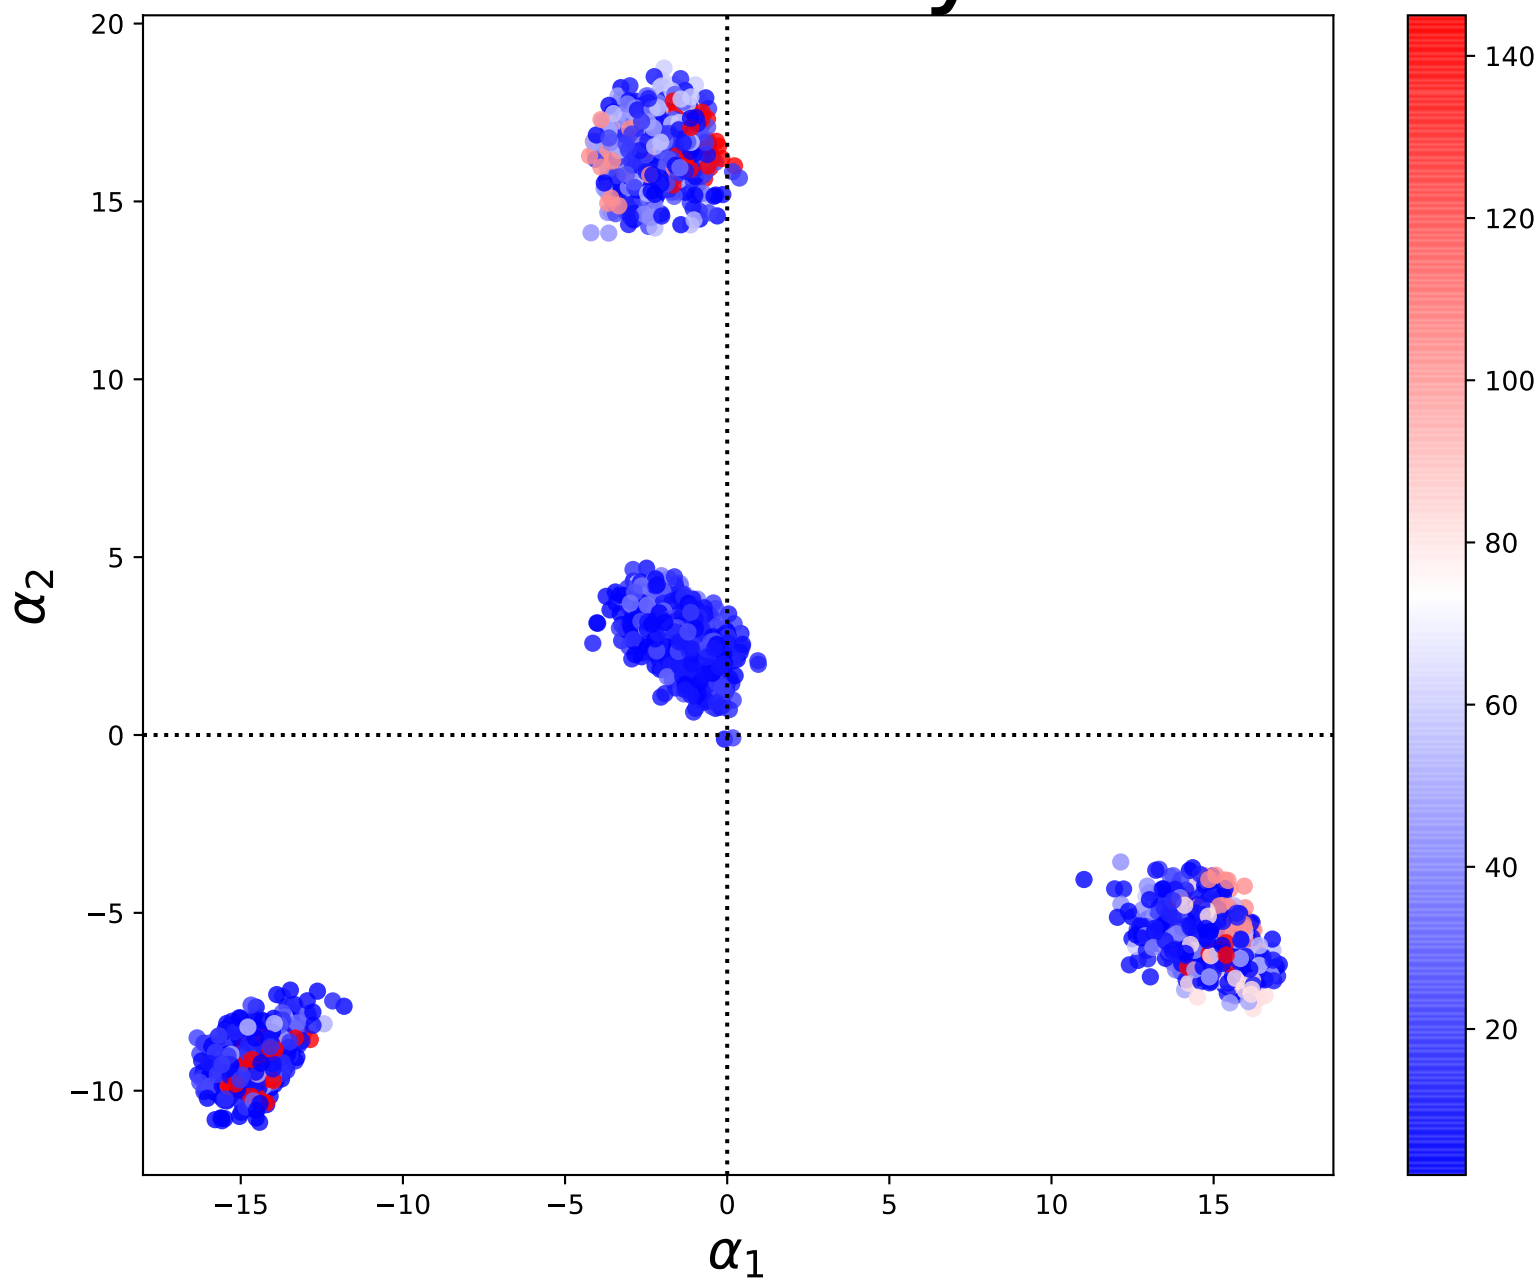

Supplement: OptionalSupplementaryData [file wf_aniso_electra_9.pdf › plots/appendix_plots/wf_aniso_electra_9.pdf]

# GPT2 Layer 0

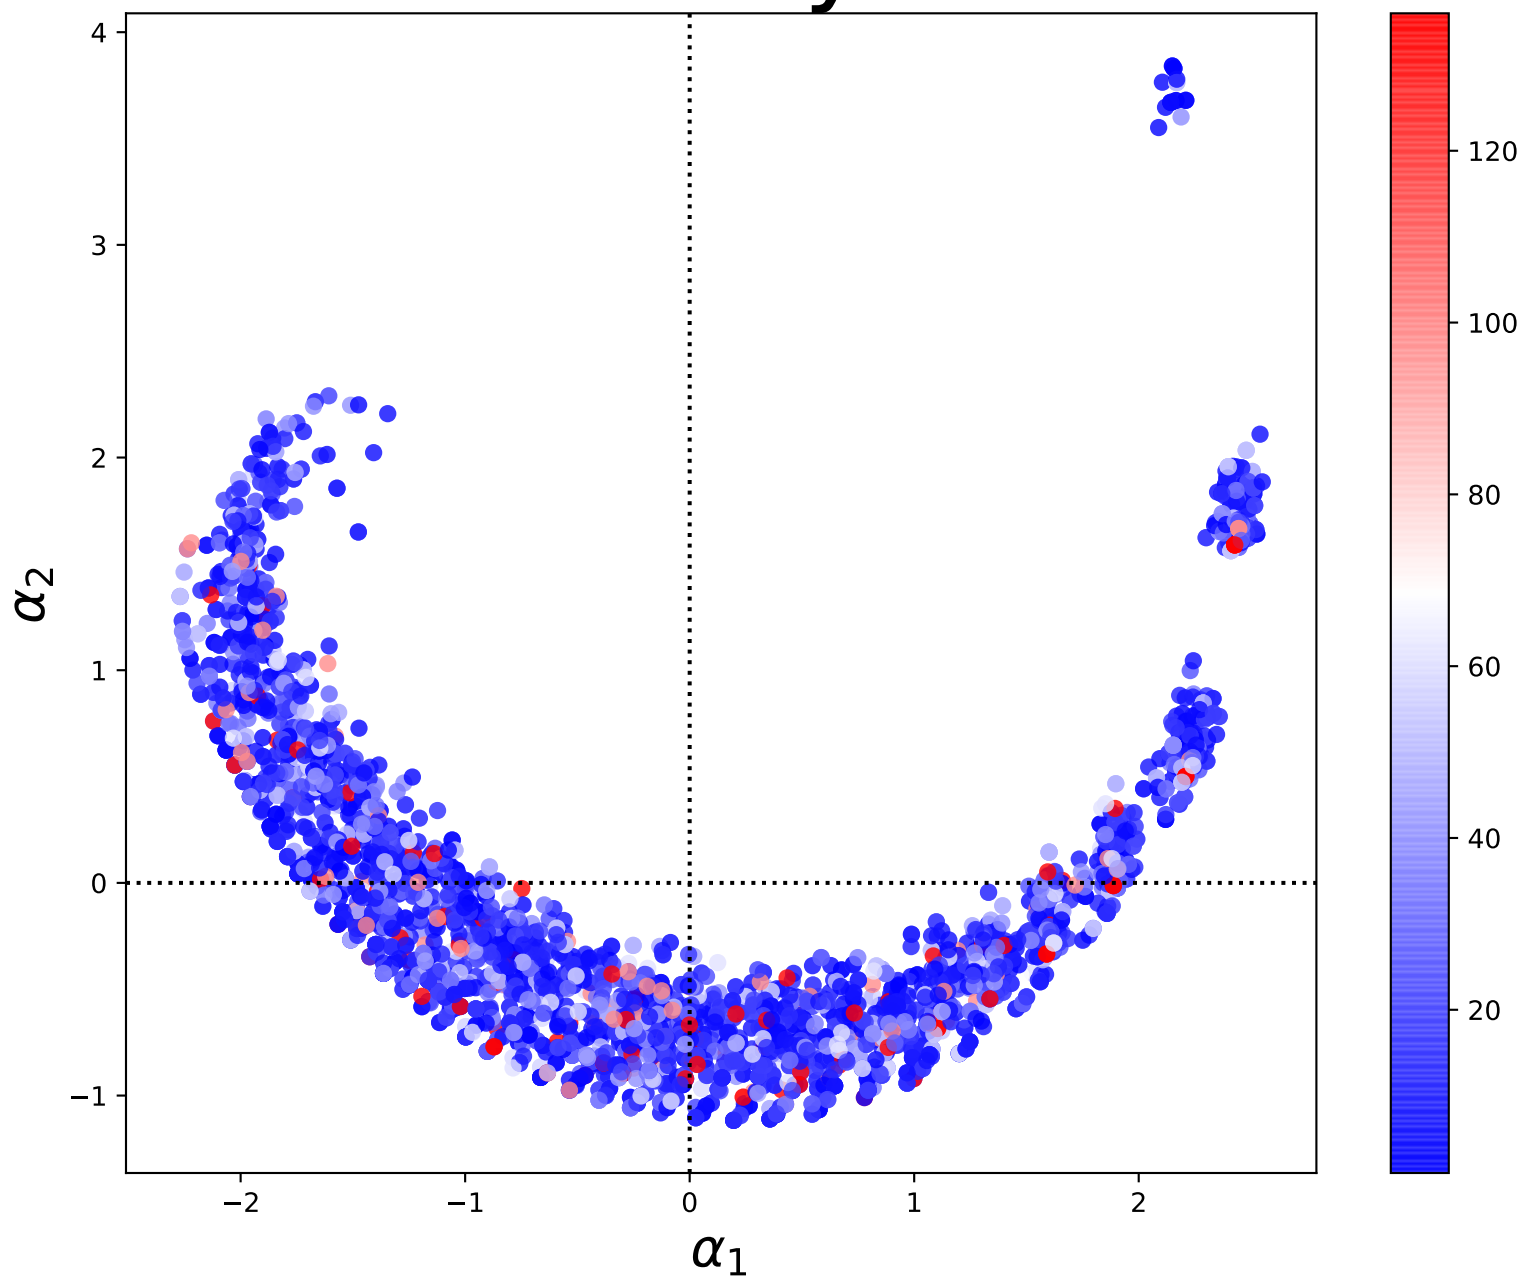

Supplement: OptionalSupplementaryData [file wf_aniso_gpt2_0.pdf › plots/appendix_plots/wf_aniso_gpt2_0.pdf]

# GPT2 Layer 1

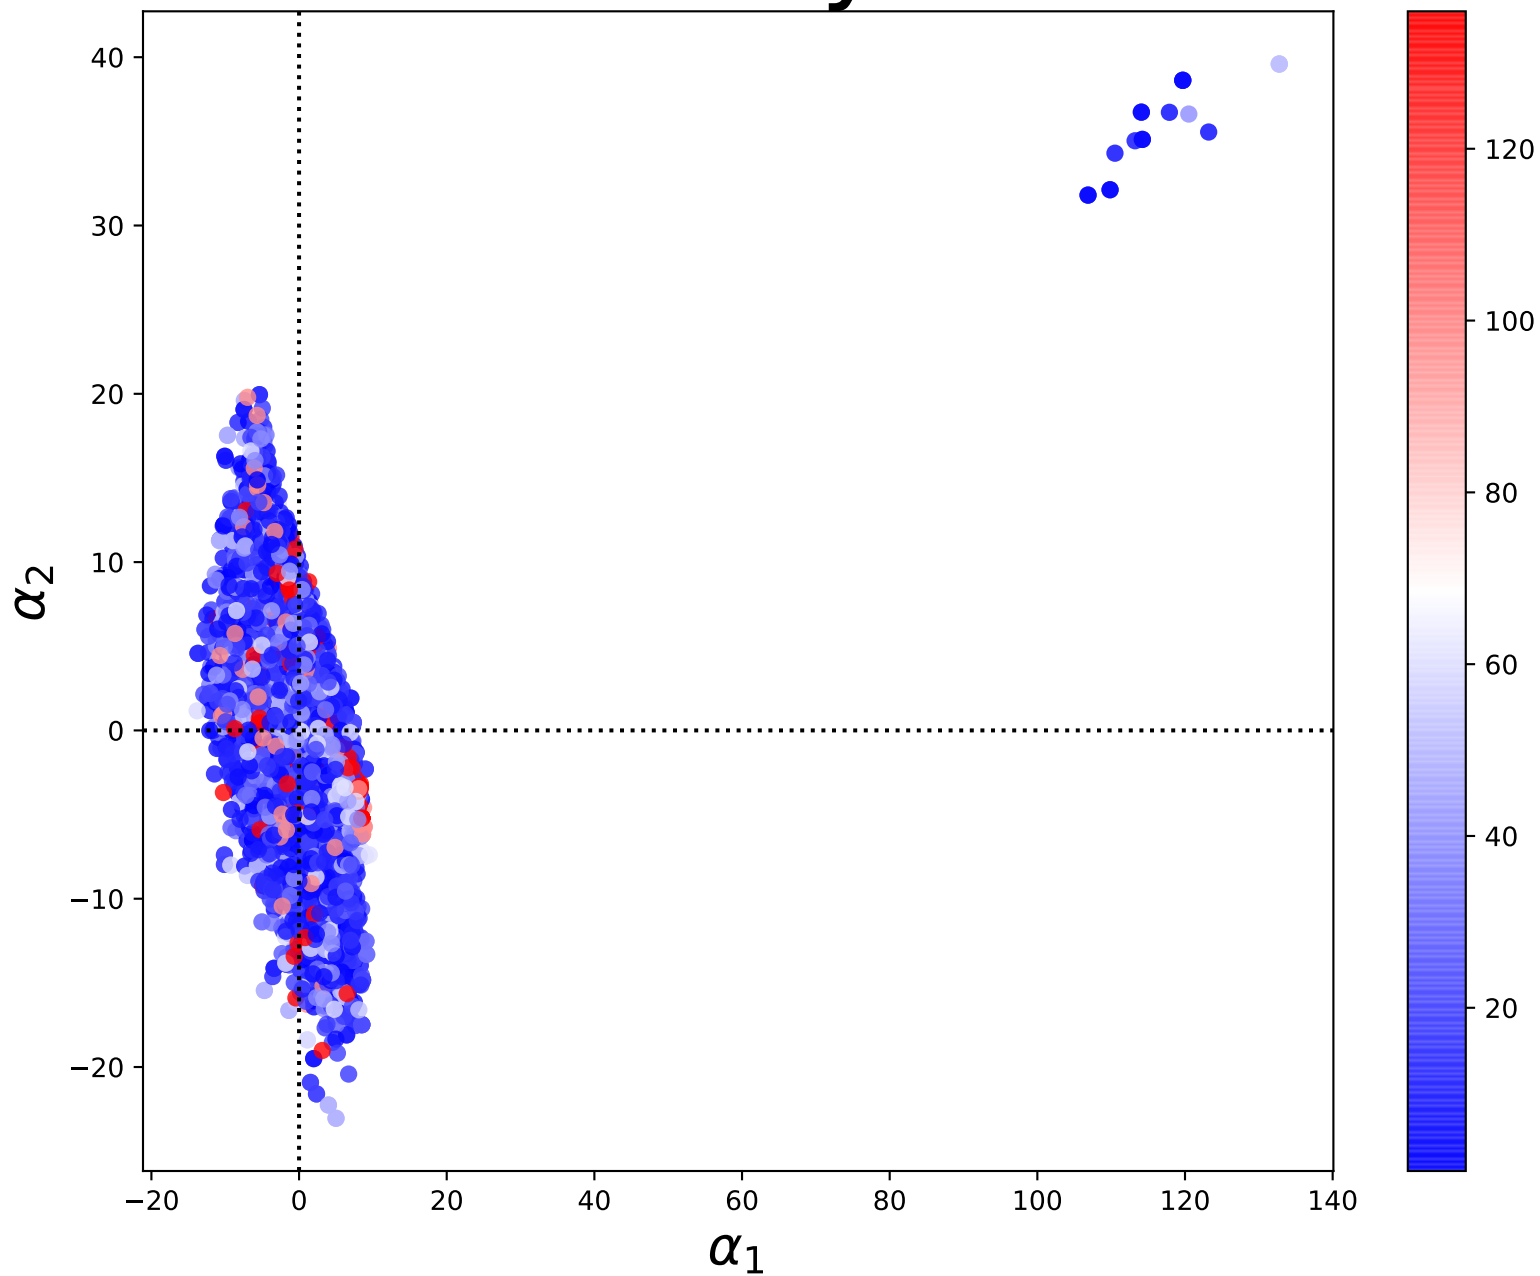

Supplement: OptionalSupplementaryData [file wf_aniso_gpt2_1.pdf › plots/appendix_plots/wf_aniso_gpt2_1.pdf]

# GPT2 Layer 10

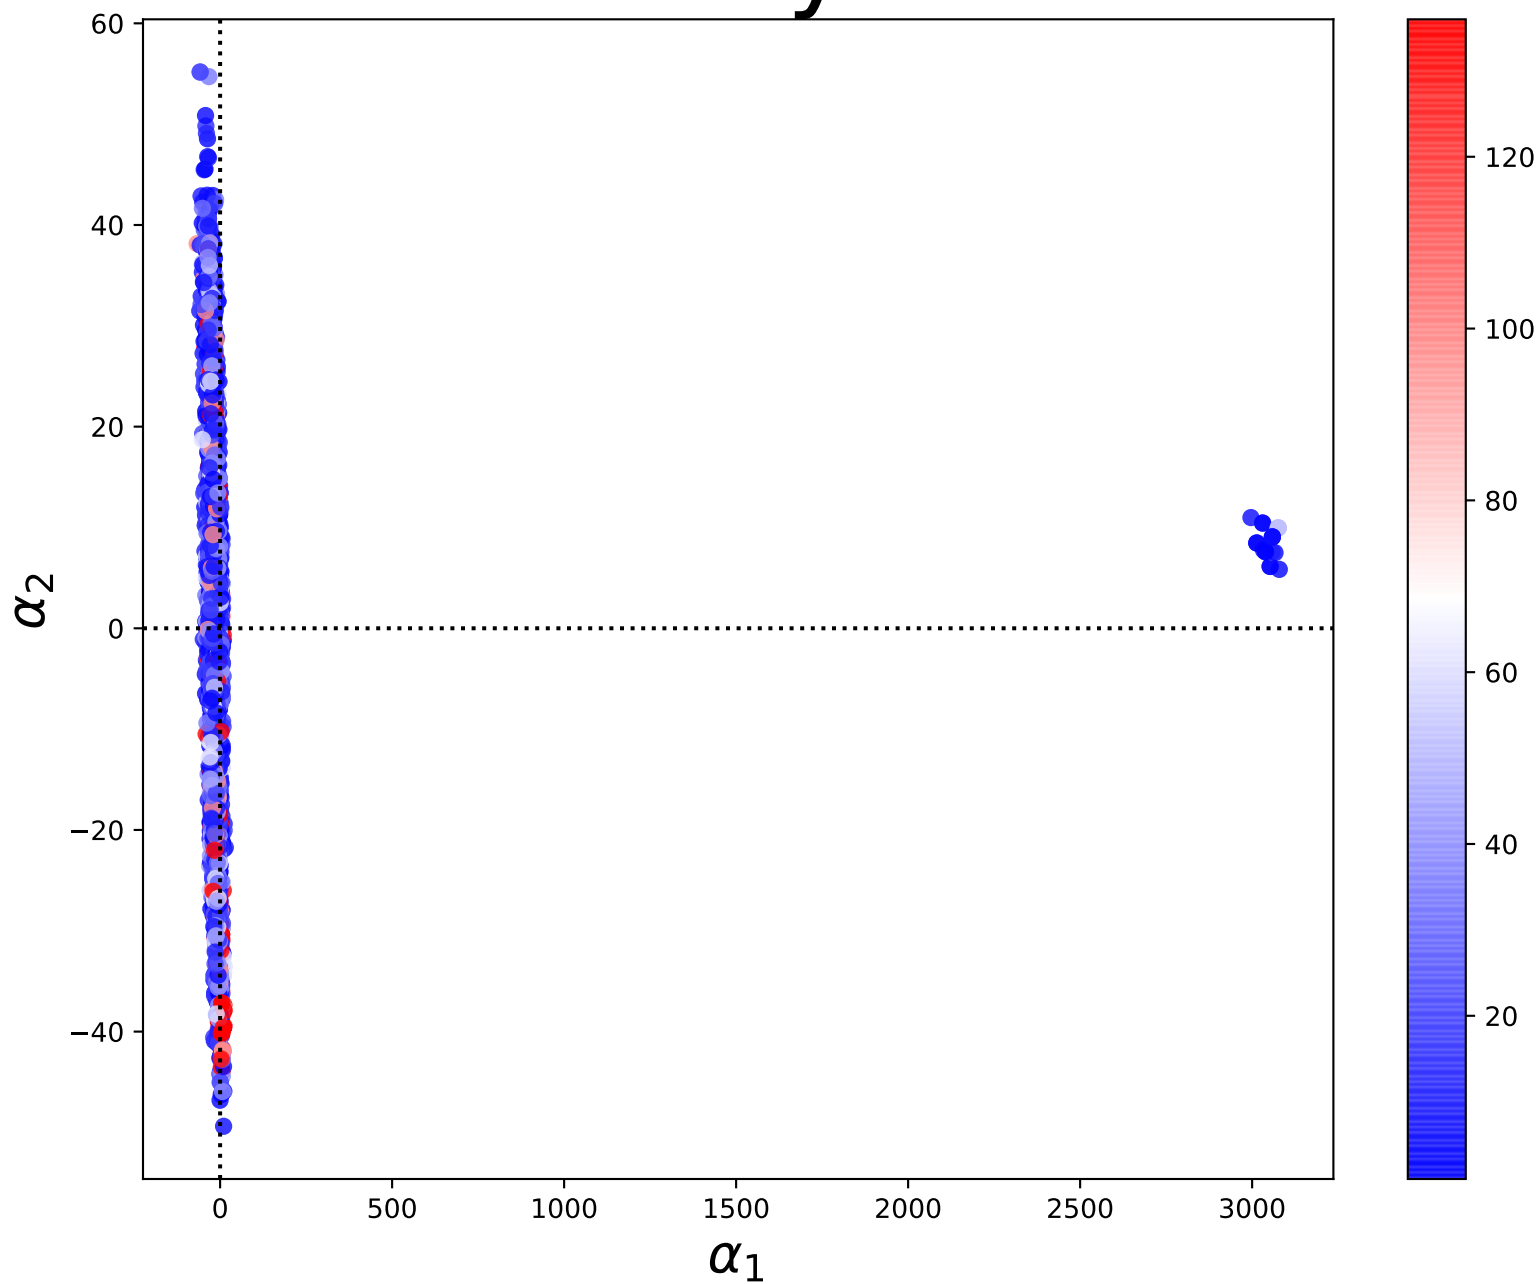

Supplement: OptionalSupplementaryData [file wf_aniso_gpt2_10.pdf › plots/appendix_plots/wf_aniso_gpt2_10.pdf]

# GPT2 Layer 11

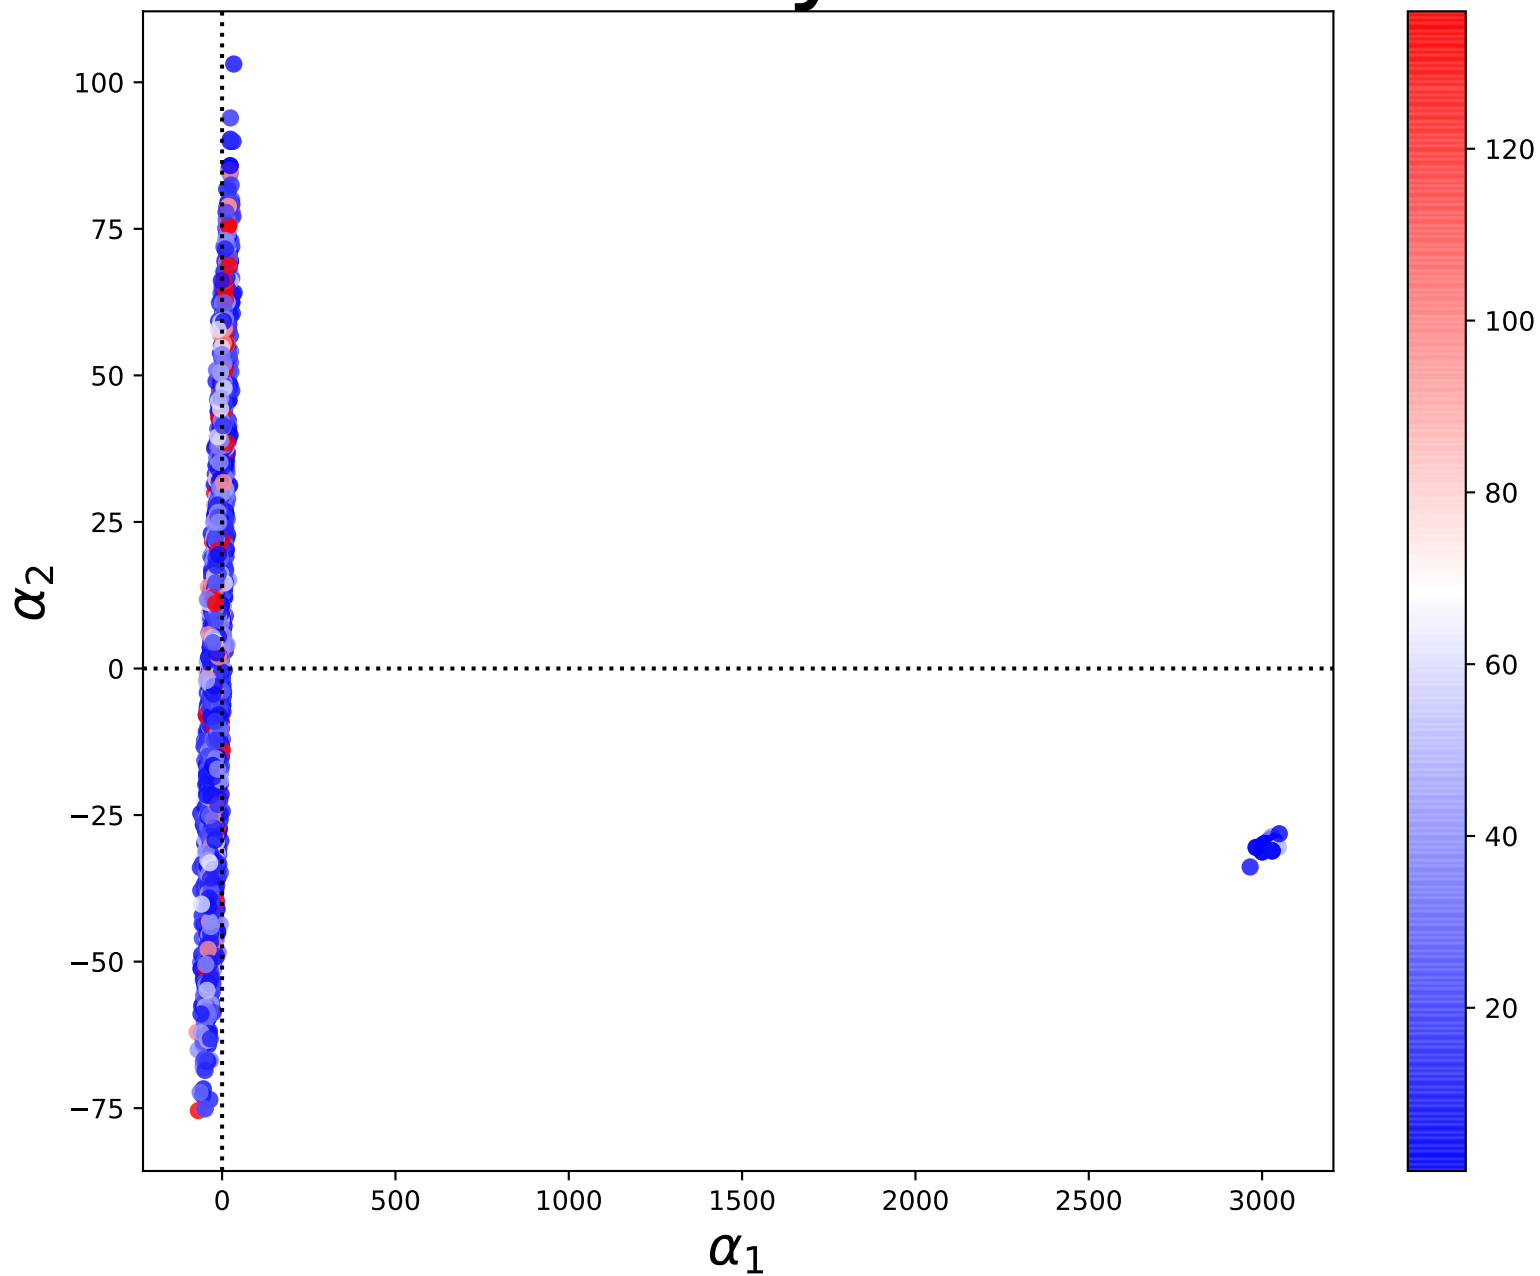

Supplement: OptionalSupplementaryData [file wf_aniso_gpt2_11.pdf › plots/appendix_plots/wf_aniso_gpt2_11.pdf]

# GPT2 Layer 12

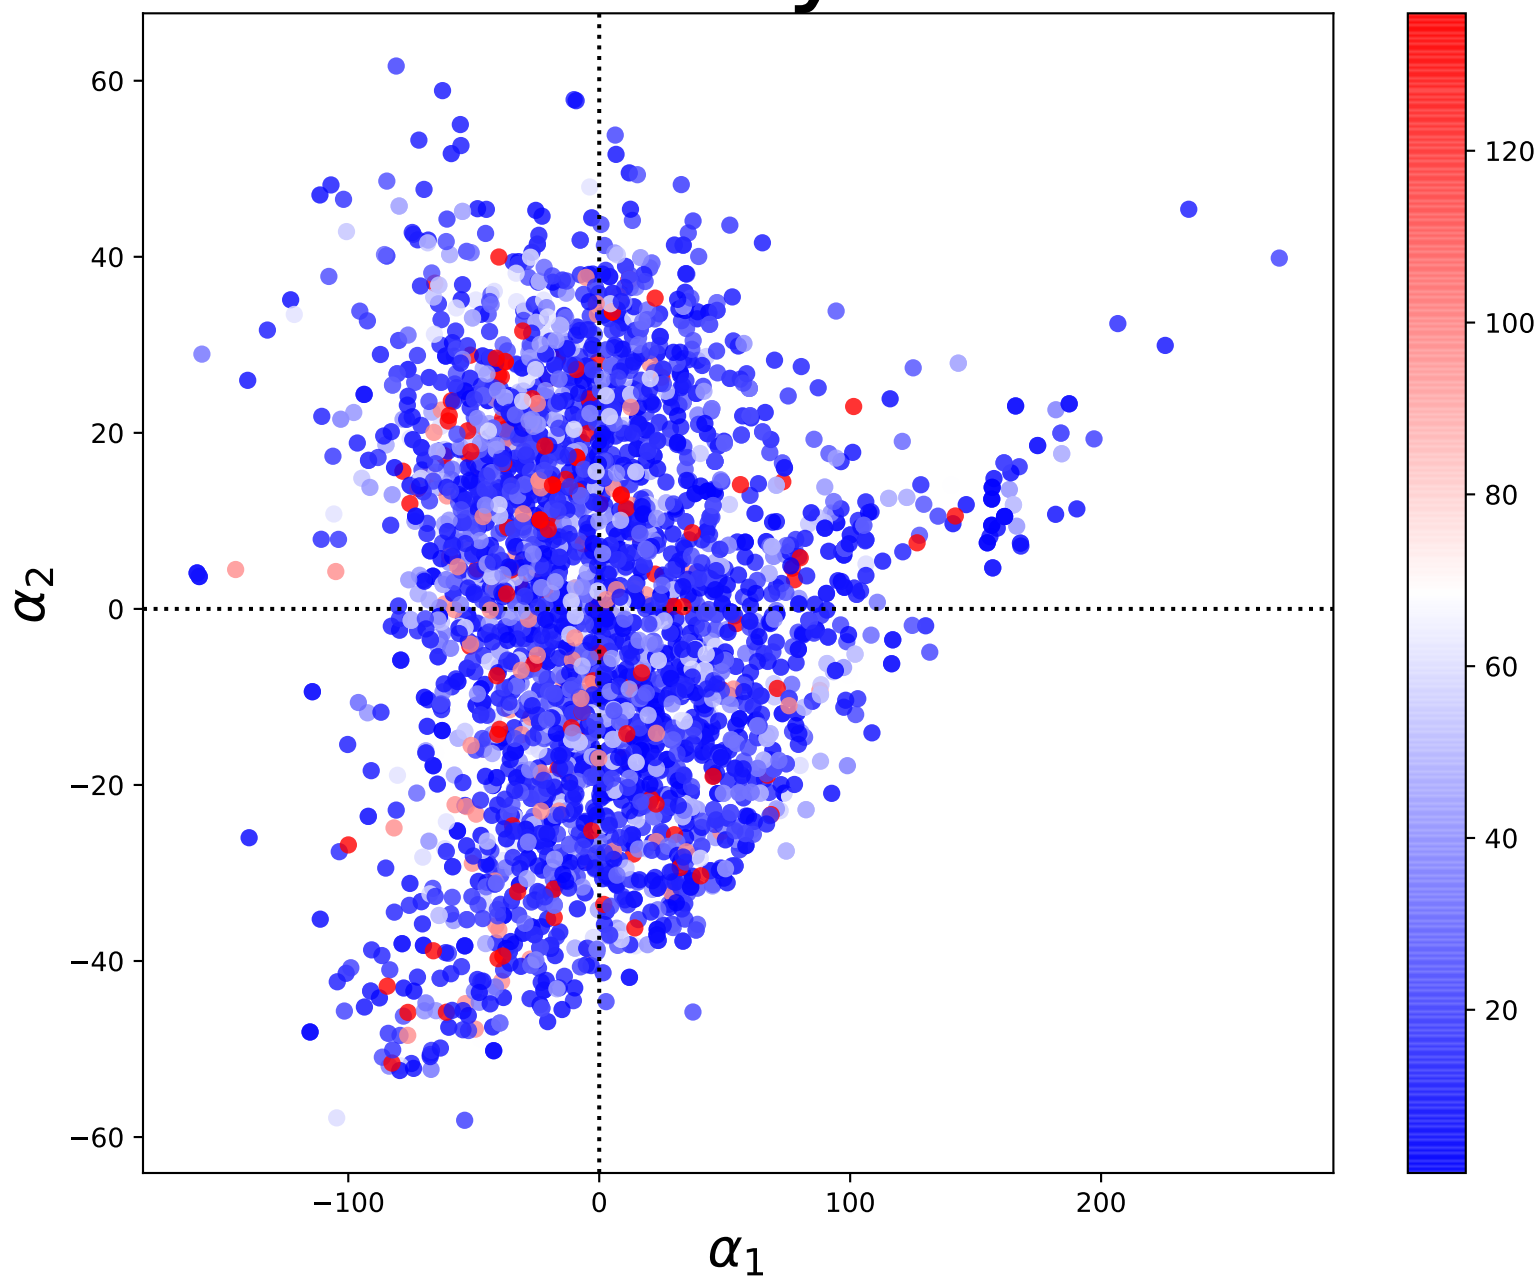

Supplement: OptionalSupplementaryData [file wf_aniso_gpt2_12.pdf › plots/appendix_plots/wf_aniso_gpt2_12.pdf]

# GPT2 Layer 2

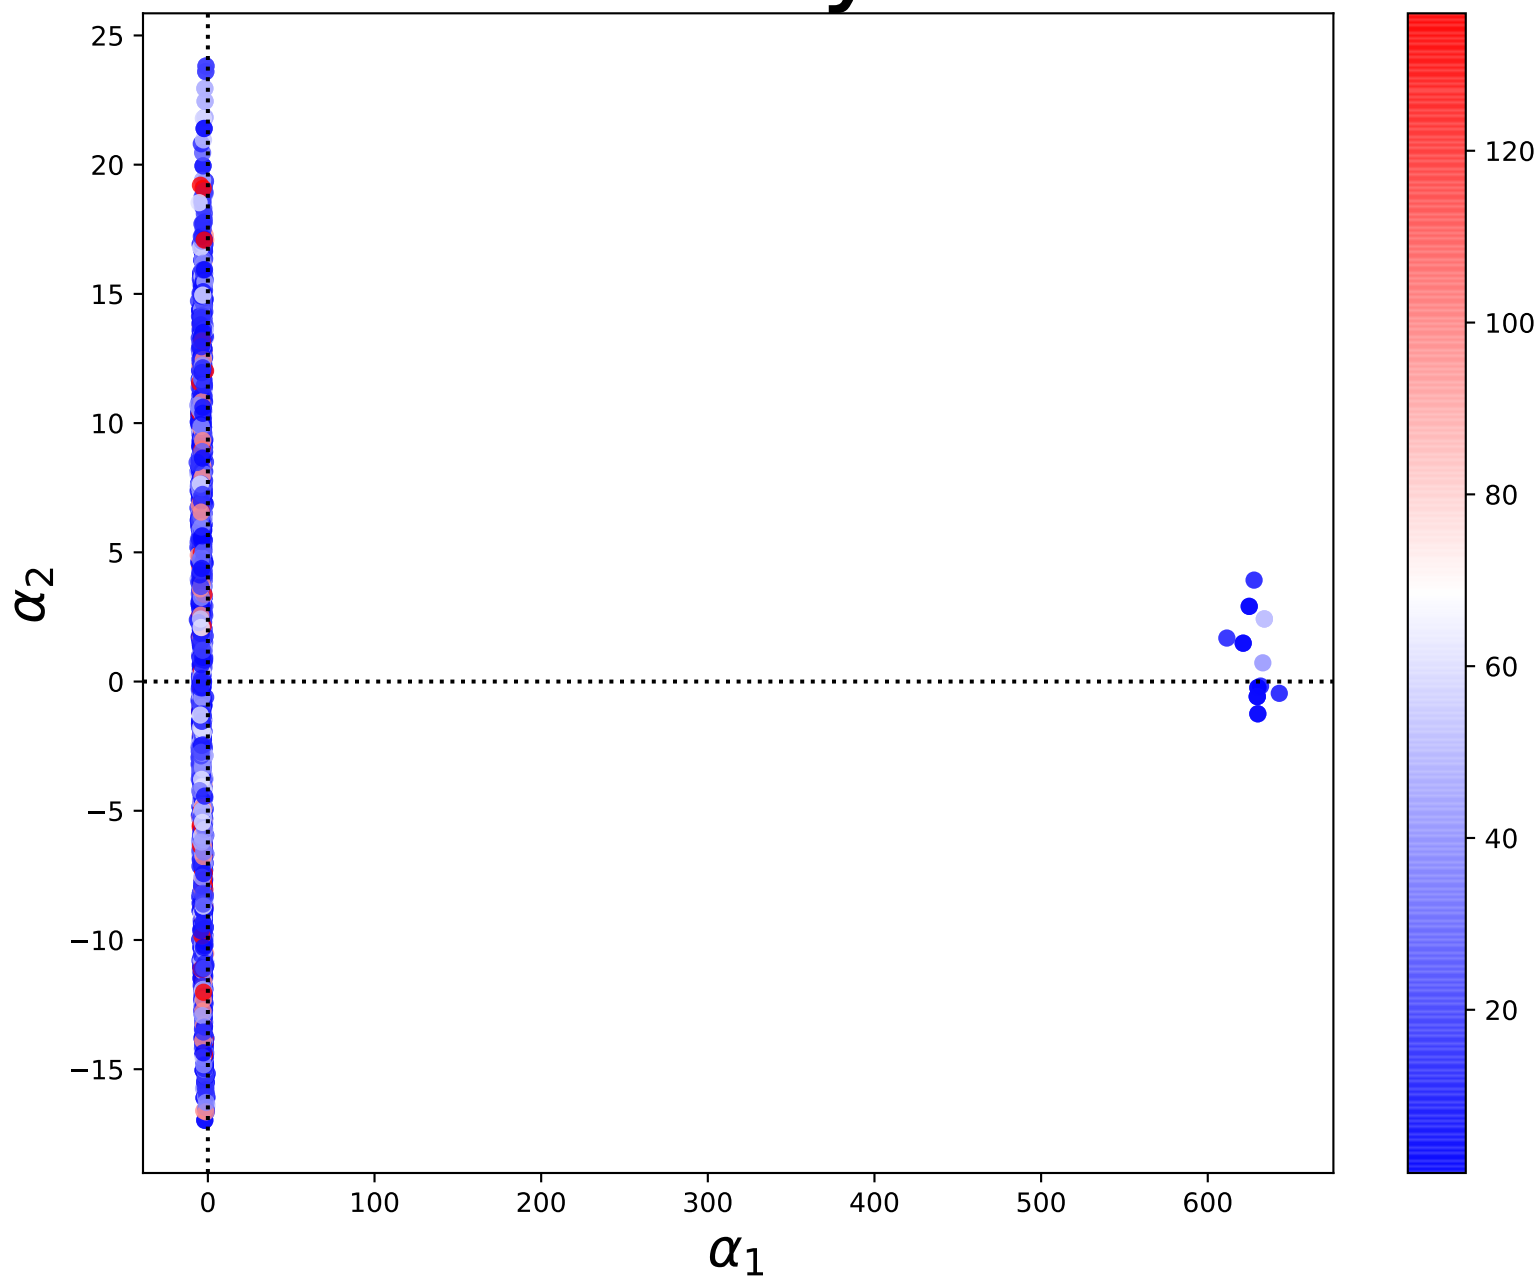

Supplement: OptionalSupplementaryData [file wf_aniso_gpt2_2.pdf › plots/appendix_plots/wf_aniso_gpt2_2.pdf]

# GPT2 Layer 3

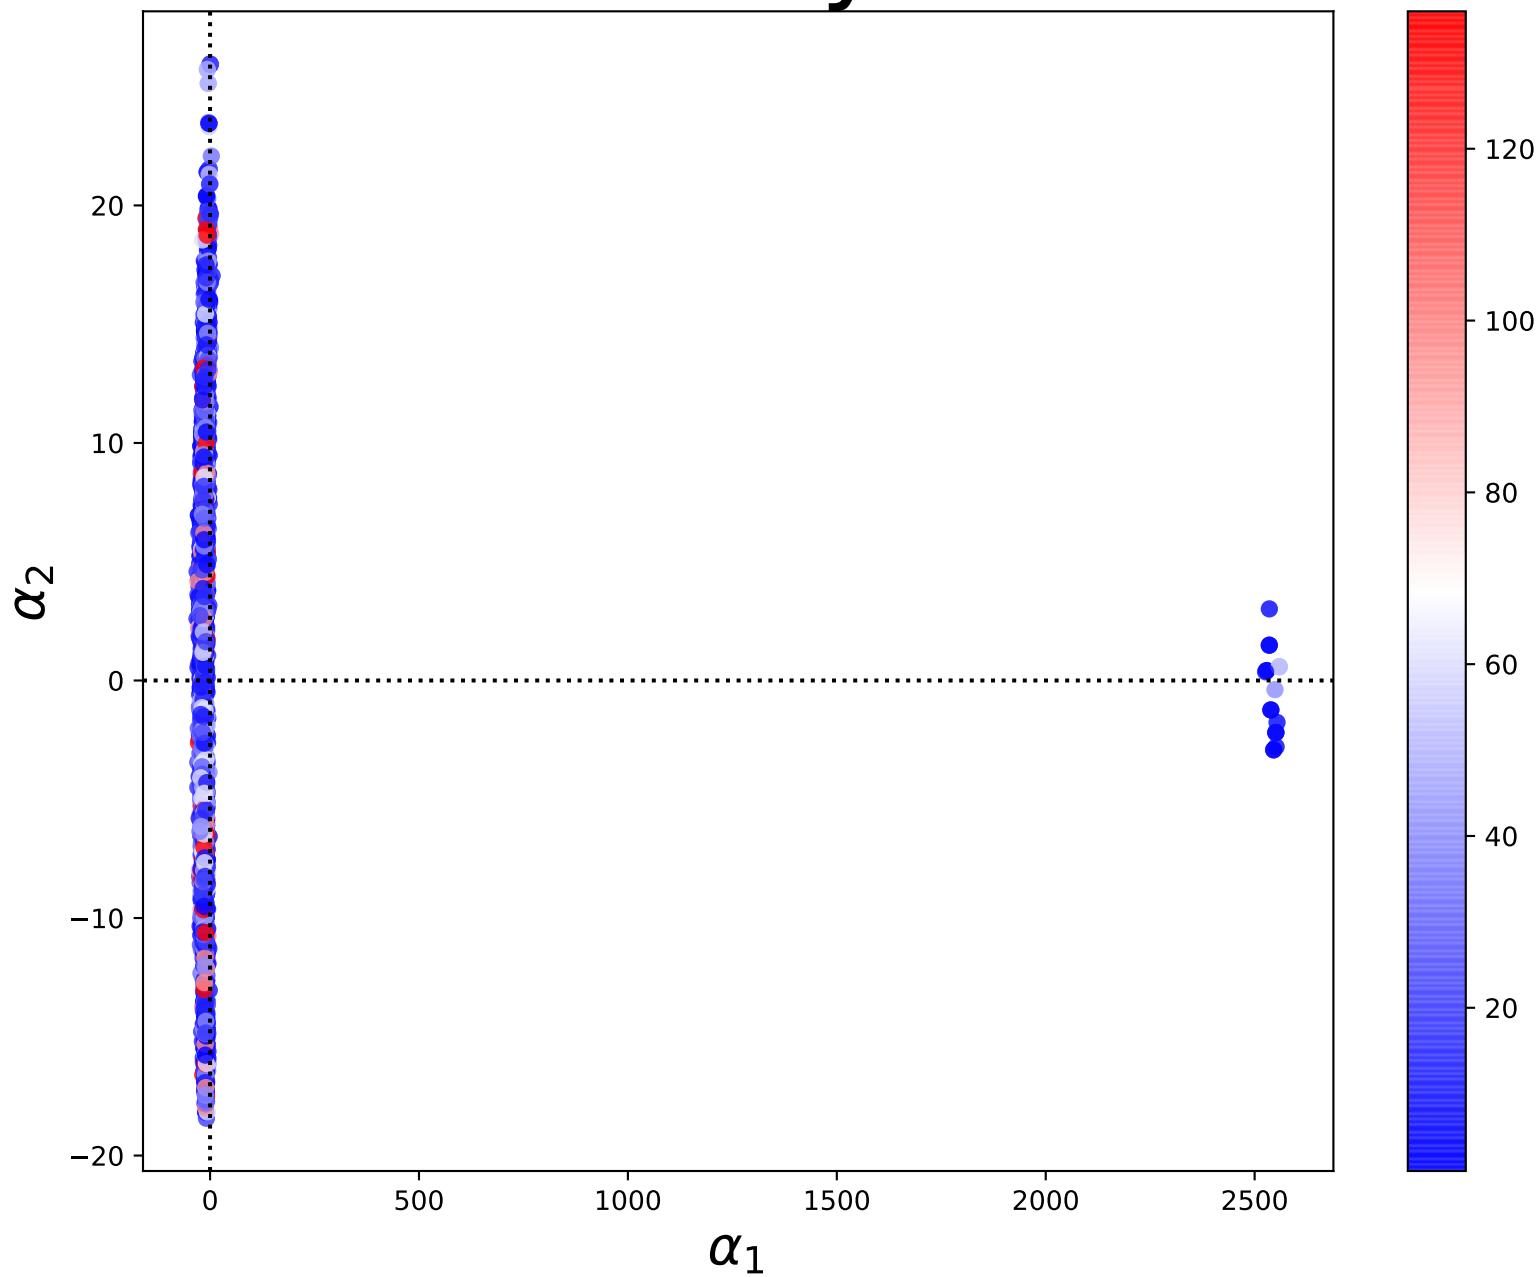

Supplement: OptionalSupplementaryData [file wf_aniso_gpt2_3.pdf › plots/appendix_plots/wf_aniso_gpt2_3.pdf]

# GPT2 Layer 4

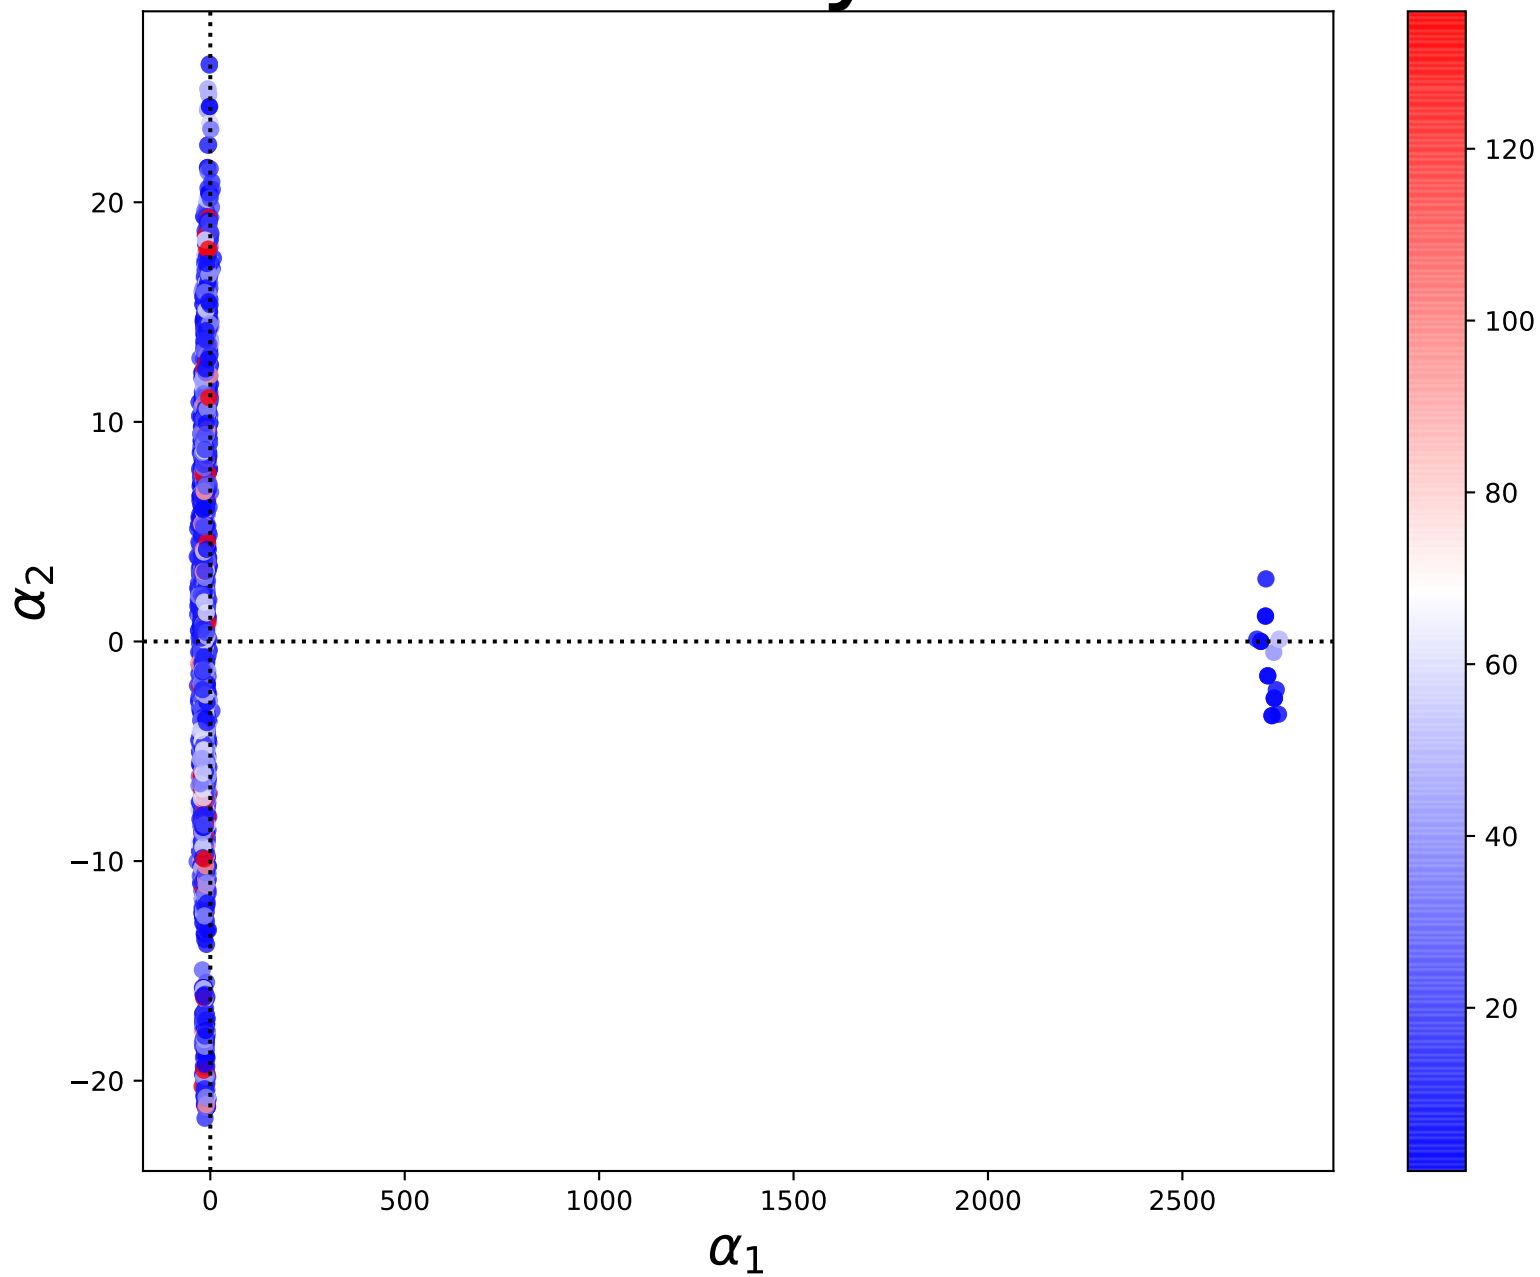

Supplement: OptionalSupplementaryData [file wf_aniso_gpt2_4.pdf › plots/appendix_plots/wf_aniso_gpt2_4.pdf]

# GPT2 Layer 5

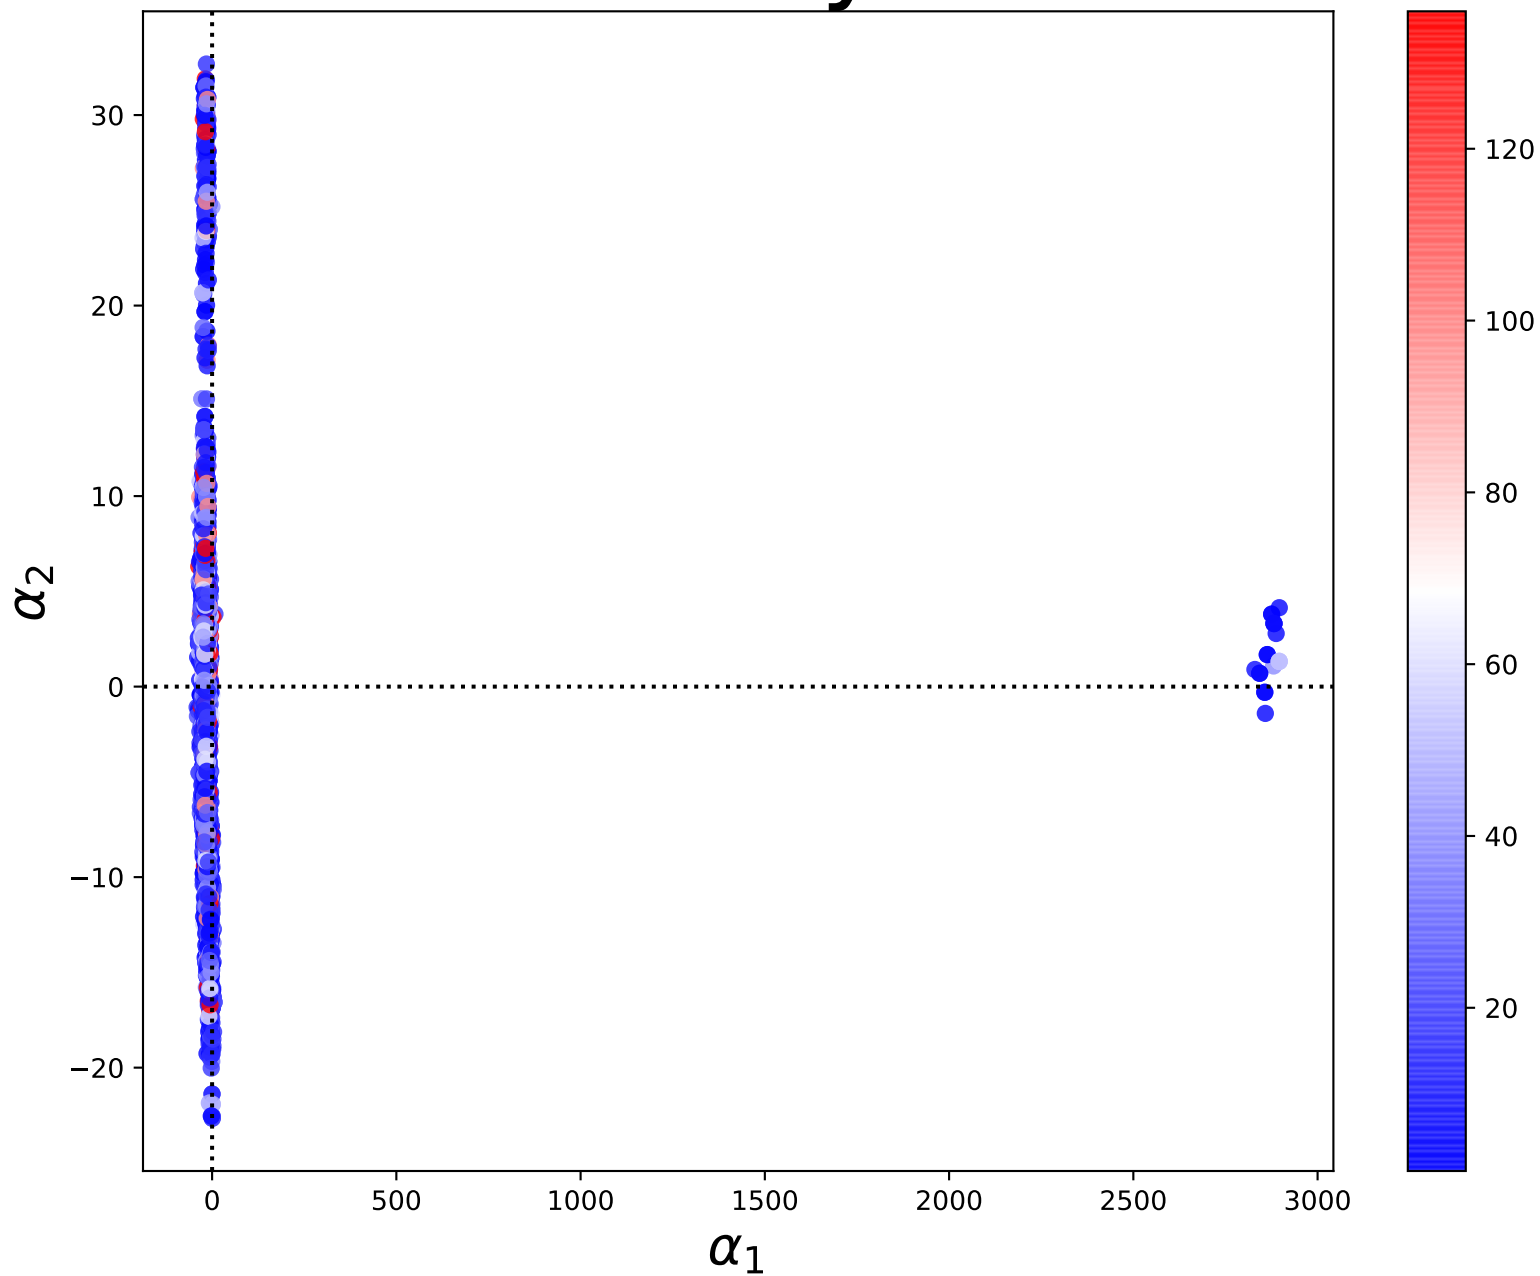

Supplement: OptionalSupplementaryData [file wf_aniso_gpt2_5.pdf › plots/appendix_plots/wf_aniso_gpt2_5.pdf]

# GPT2 Layer 6

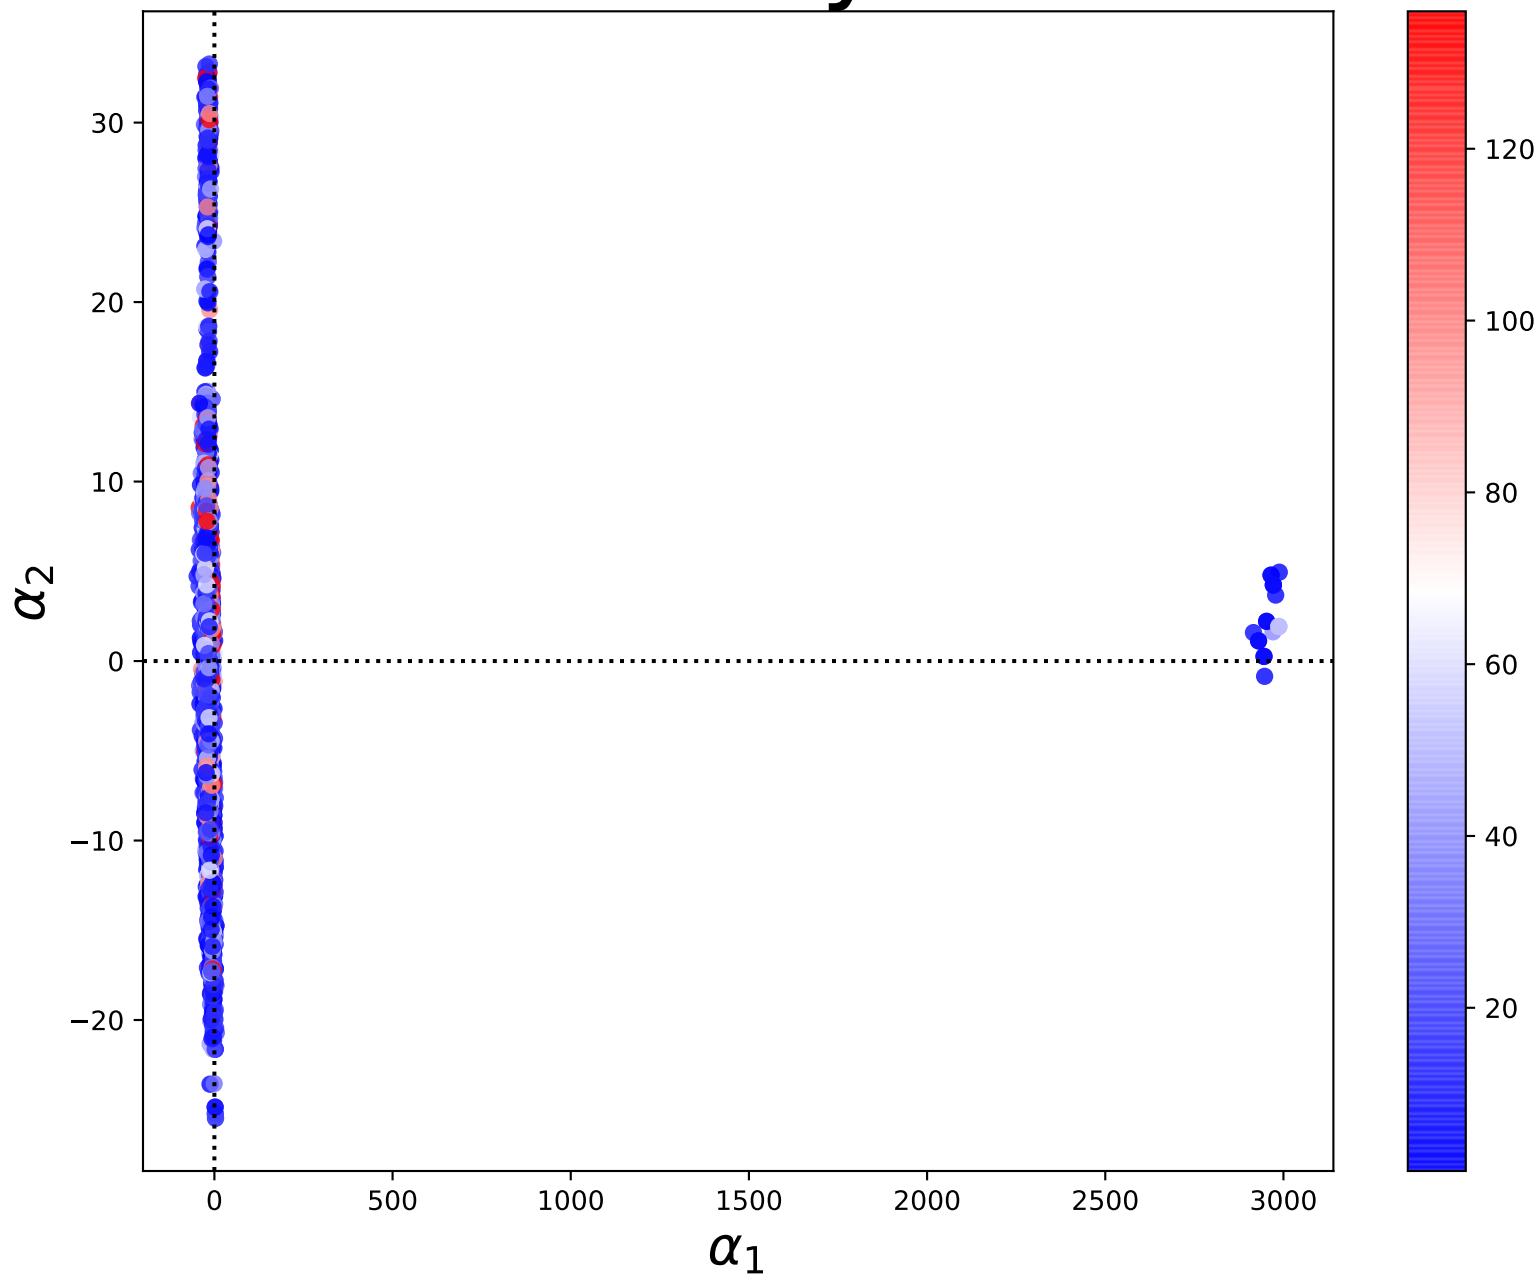

Supplement: OptionalSupplementaryData [file wf_aniso_gpt2_6.pdf › plots/appendix_plots/wf_aniso_gpt2_6.pdf]

# GPT2 Layer 7

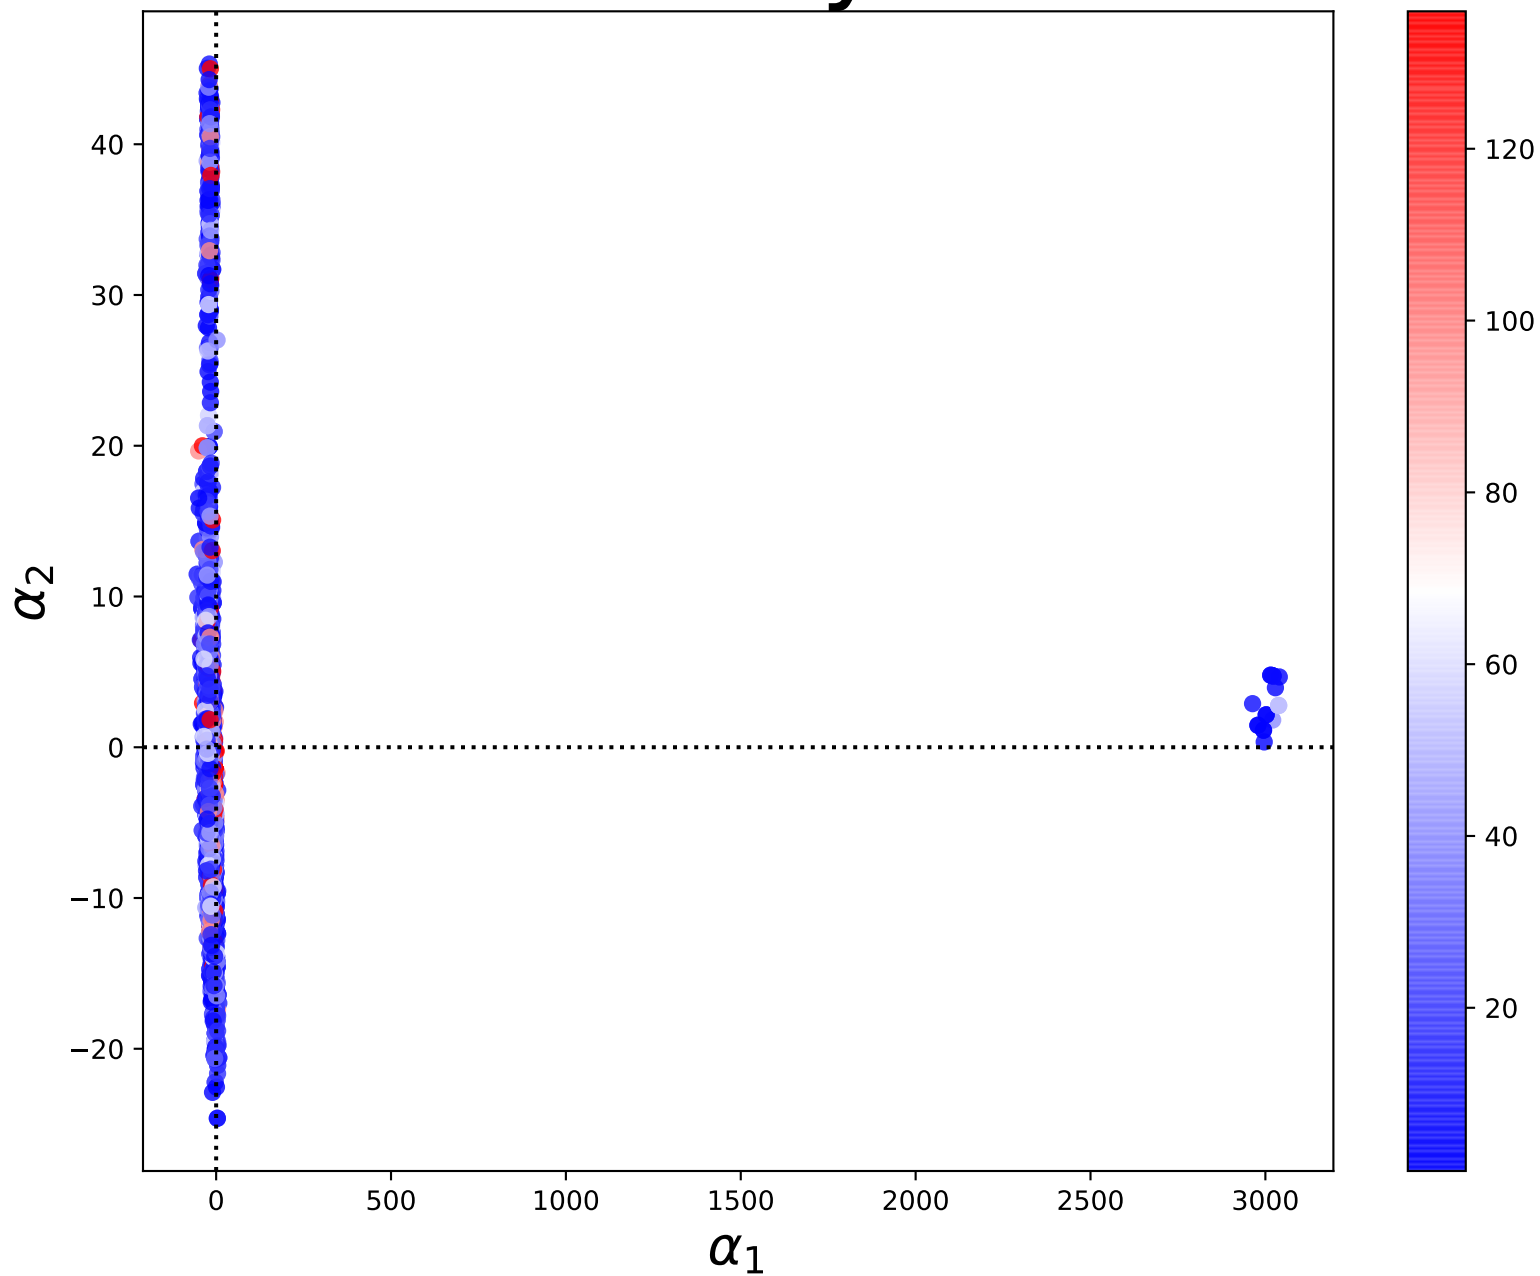

Supplement: OptionalSupplementaryData [file wf_aniso_gpt2_7.pdf › plots/appendix_plots/wf_aniso_gpt2_7.pdf]

# GPT2 Layer 8

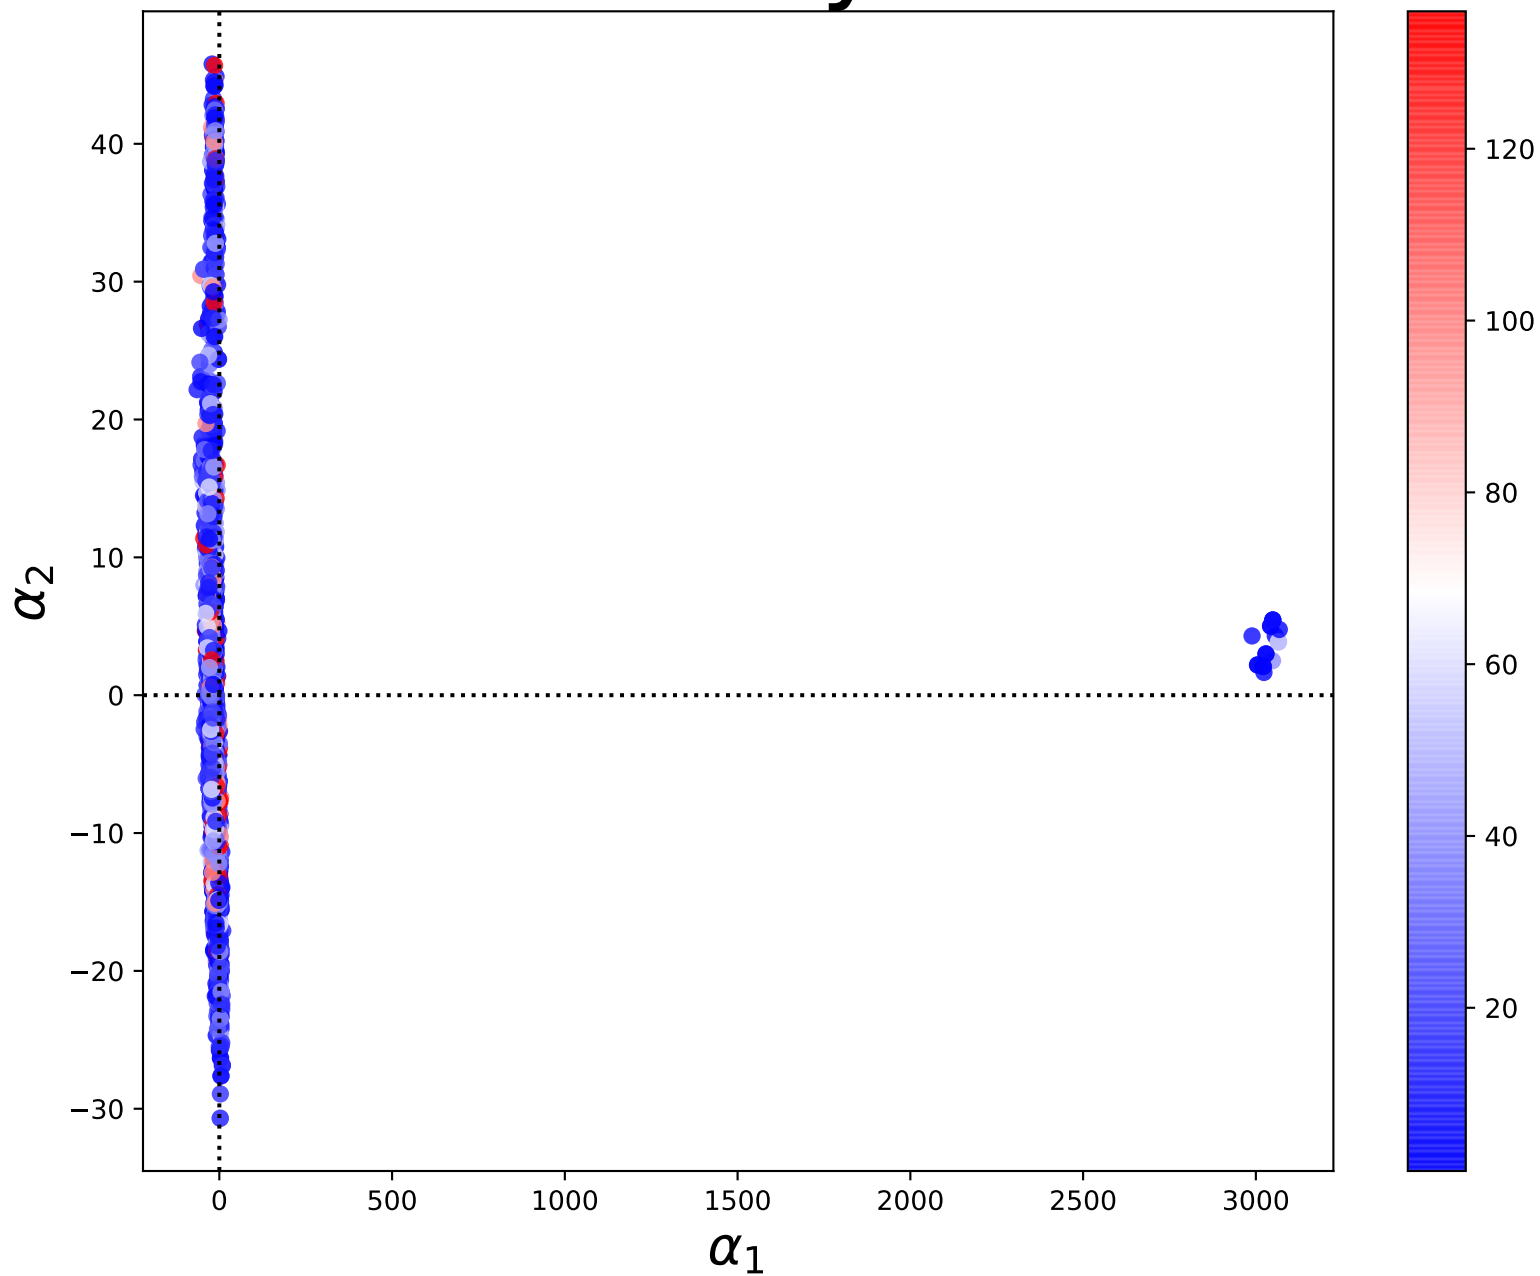

Supplement: OptionalSupplementaryData [file wf_aniso_gpt2_8.pdf › plots/appendix_plots/wf_aniso_gpt2_8.pdf]

# GPT2 Layer 9

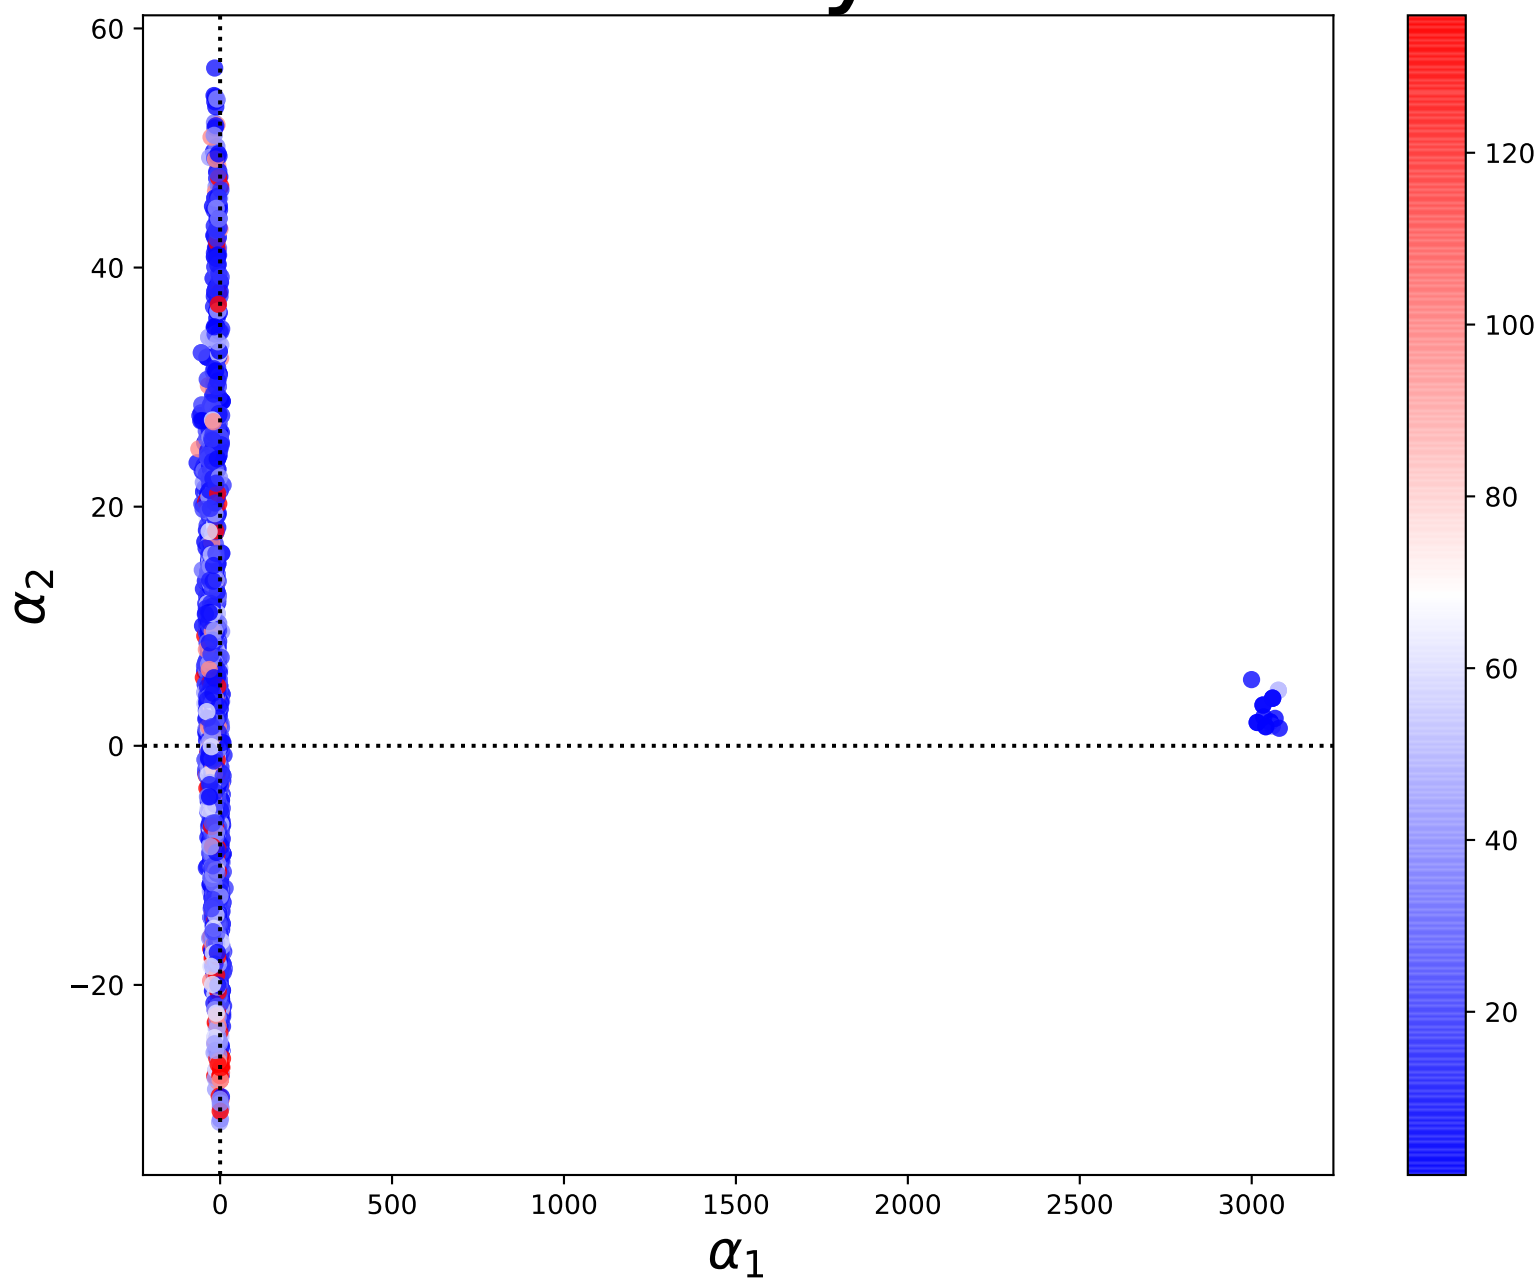

Supplement: OptionalSupplementaryData [file wf_aniso_gpt2_9.pdf › plots/appendix_plots/wf_aniso_gpt2_9.pdf]

# BERT Layer 0

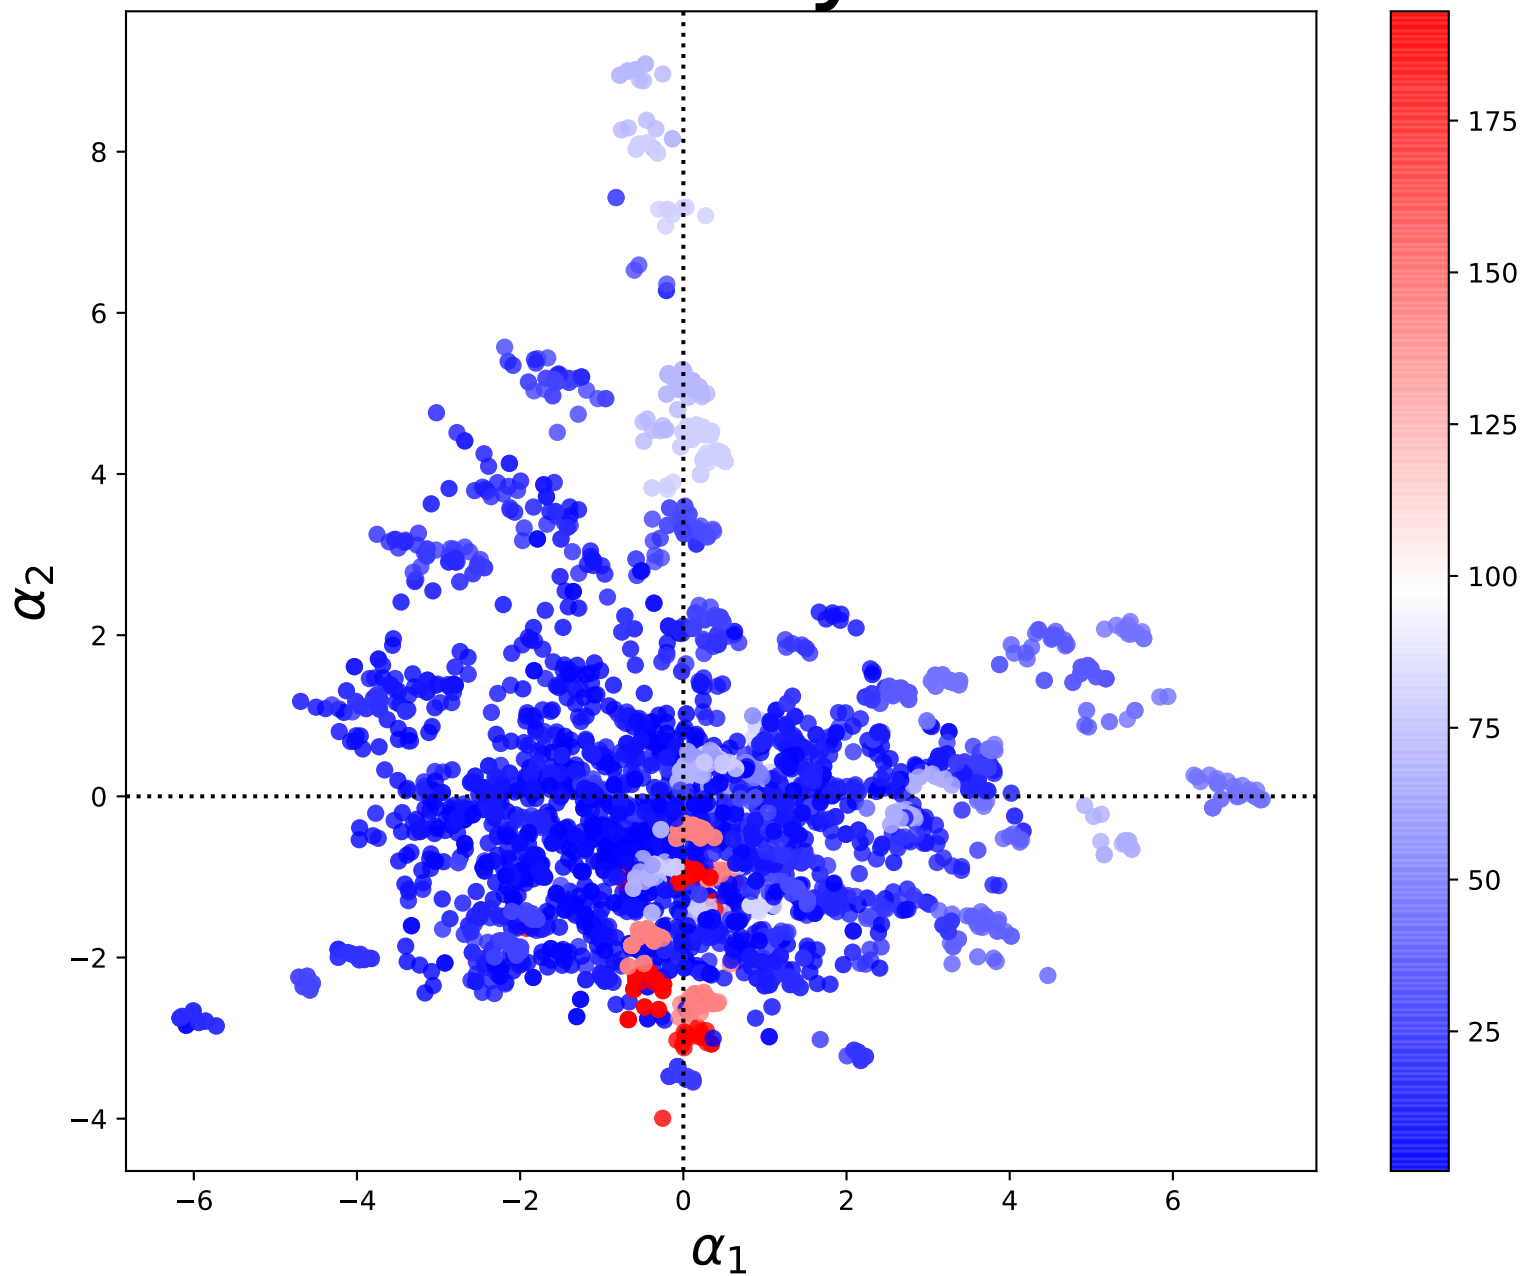

Supplement: OptionalSupplementaryData [file wf_aniso_retrobert_0.pdf › plots/appendix_plots/wf_aniso_retrobert_0.pdf]

# BERT Layer 1

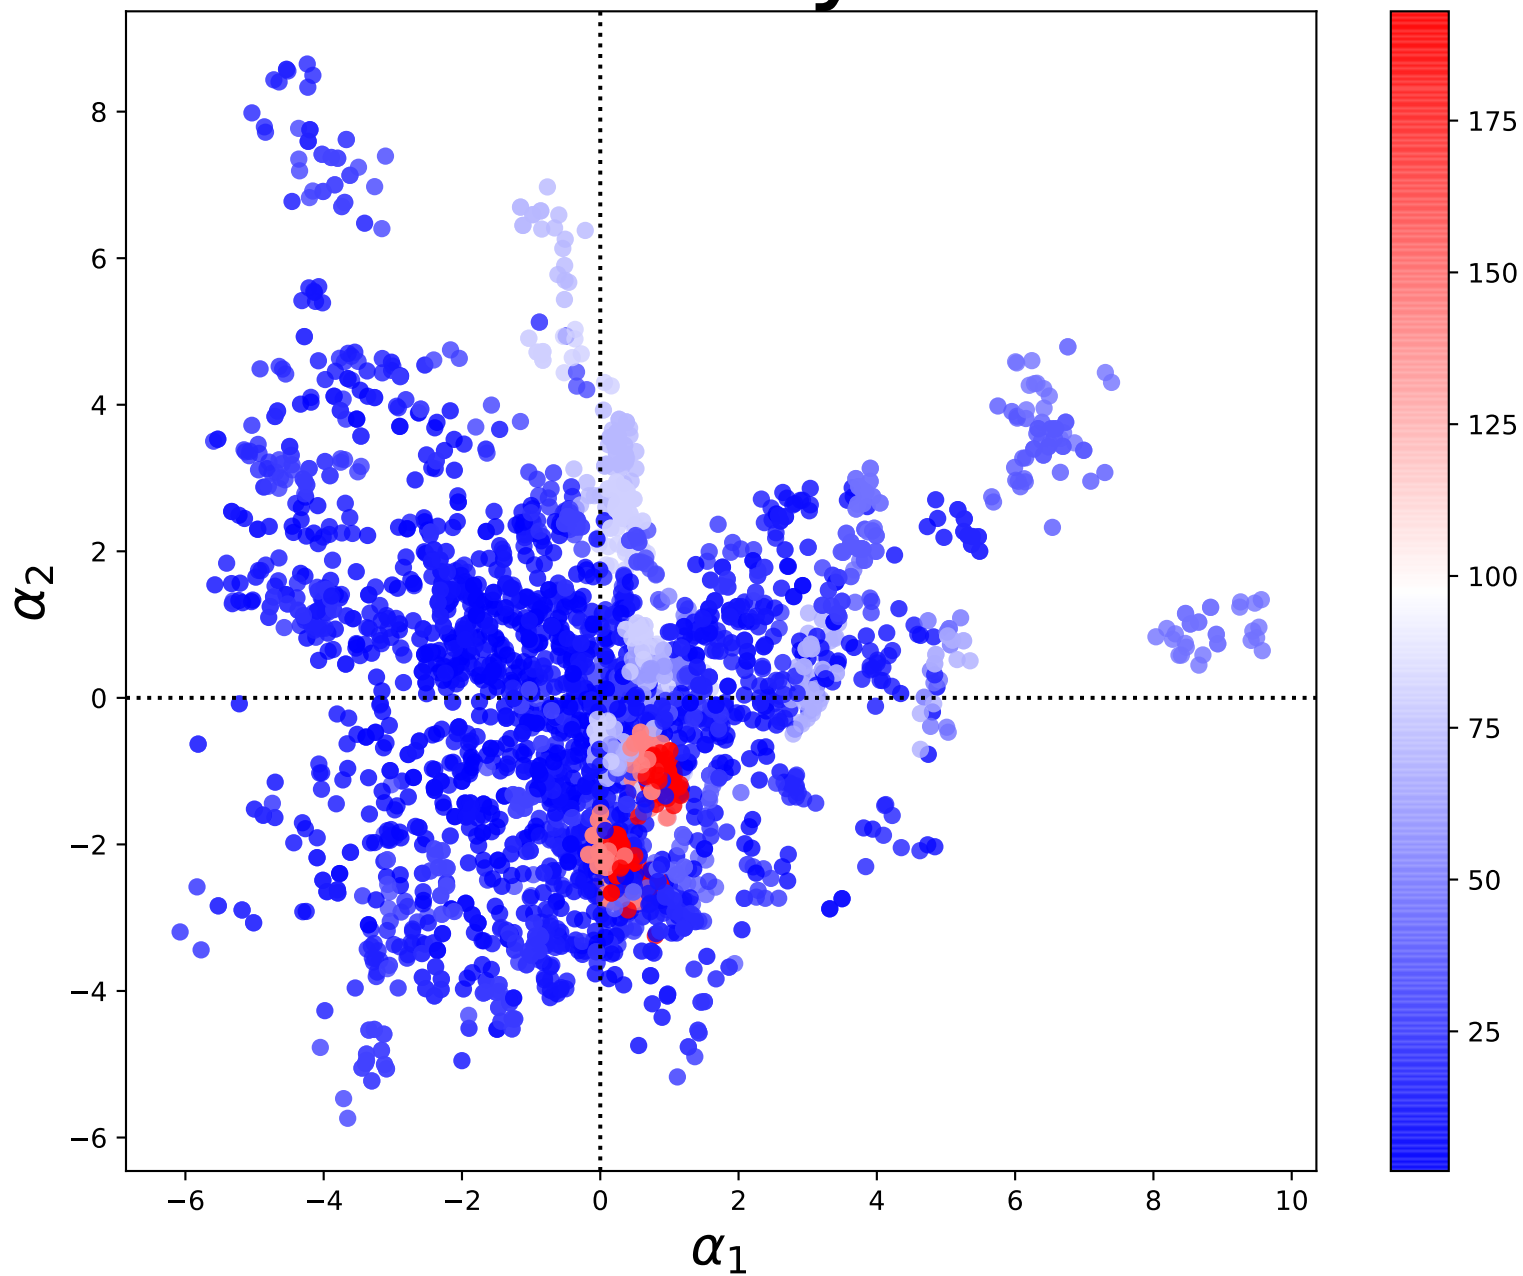

Supplement: OptionalSupplementaryData [file wf_aniso_retrobert_1.pdf › plots/appendix_plots/wf_aniso_retrobert_1.pdf]

# BERT Layer 10

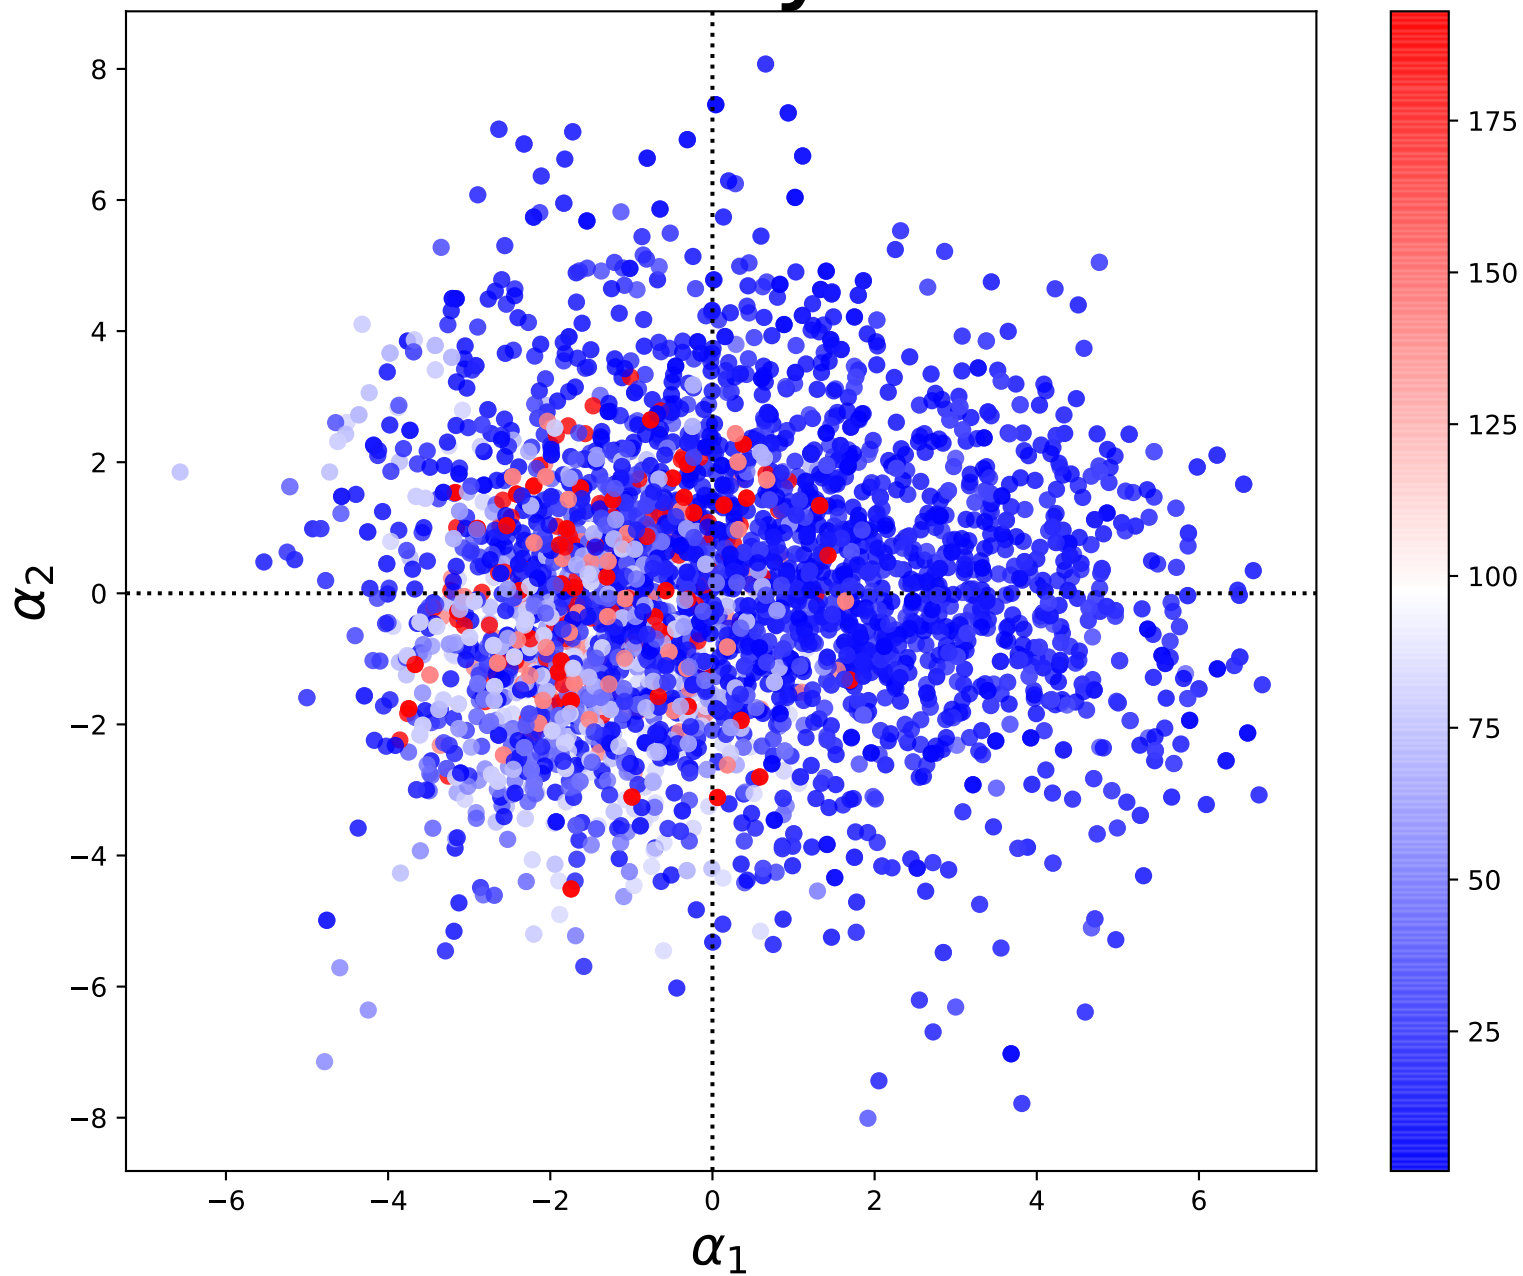

Supplement: OptionalSupplementaryData [file wf_aniso_retrobert_10.pdf › plots/appendix_plots/wf_aniso_retrobert_10.pdf]

# BERT Layer 11

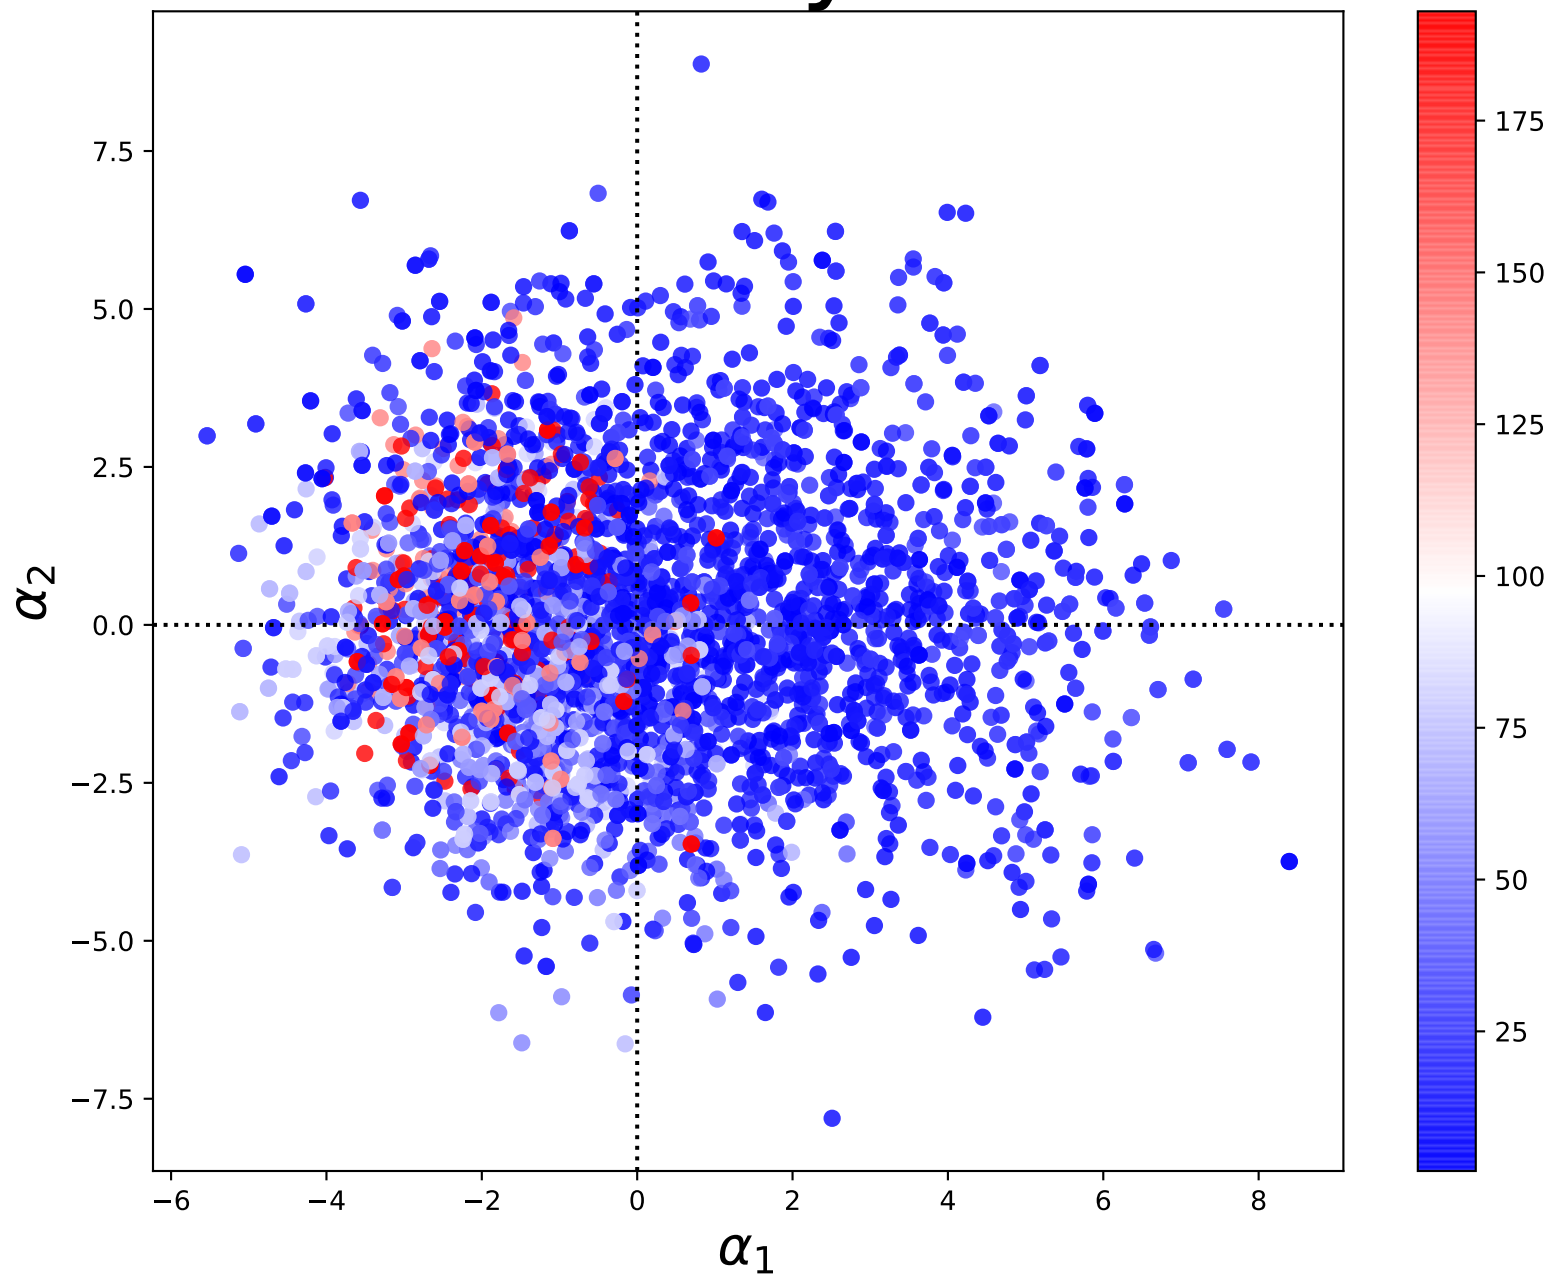

Supplement: OptionalSupplementaryData [file wf_aniso_retrobert_11.pdf › plots/appendix_plots/wf_aniso_retrobert_11.pdf]

# BERT Layer 12

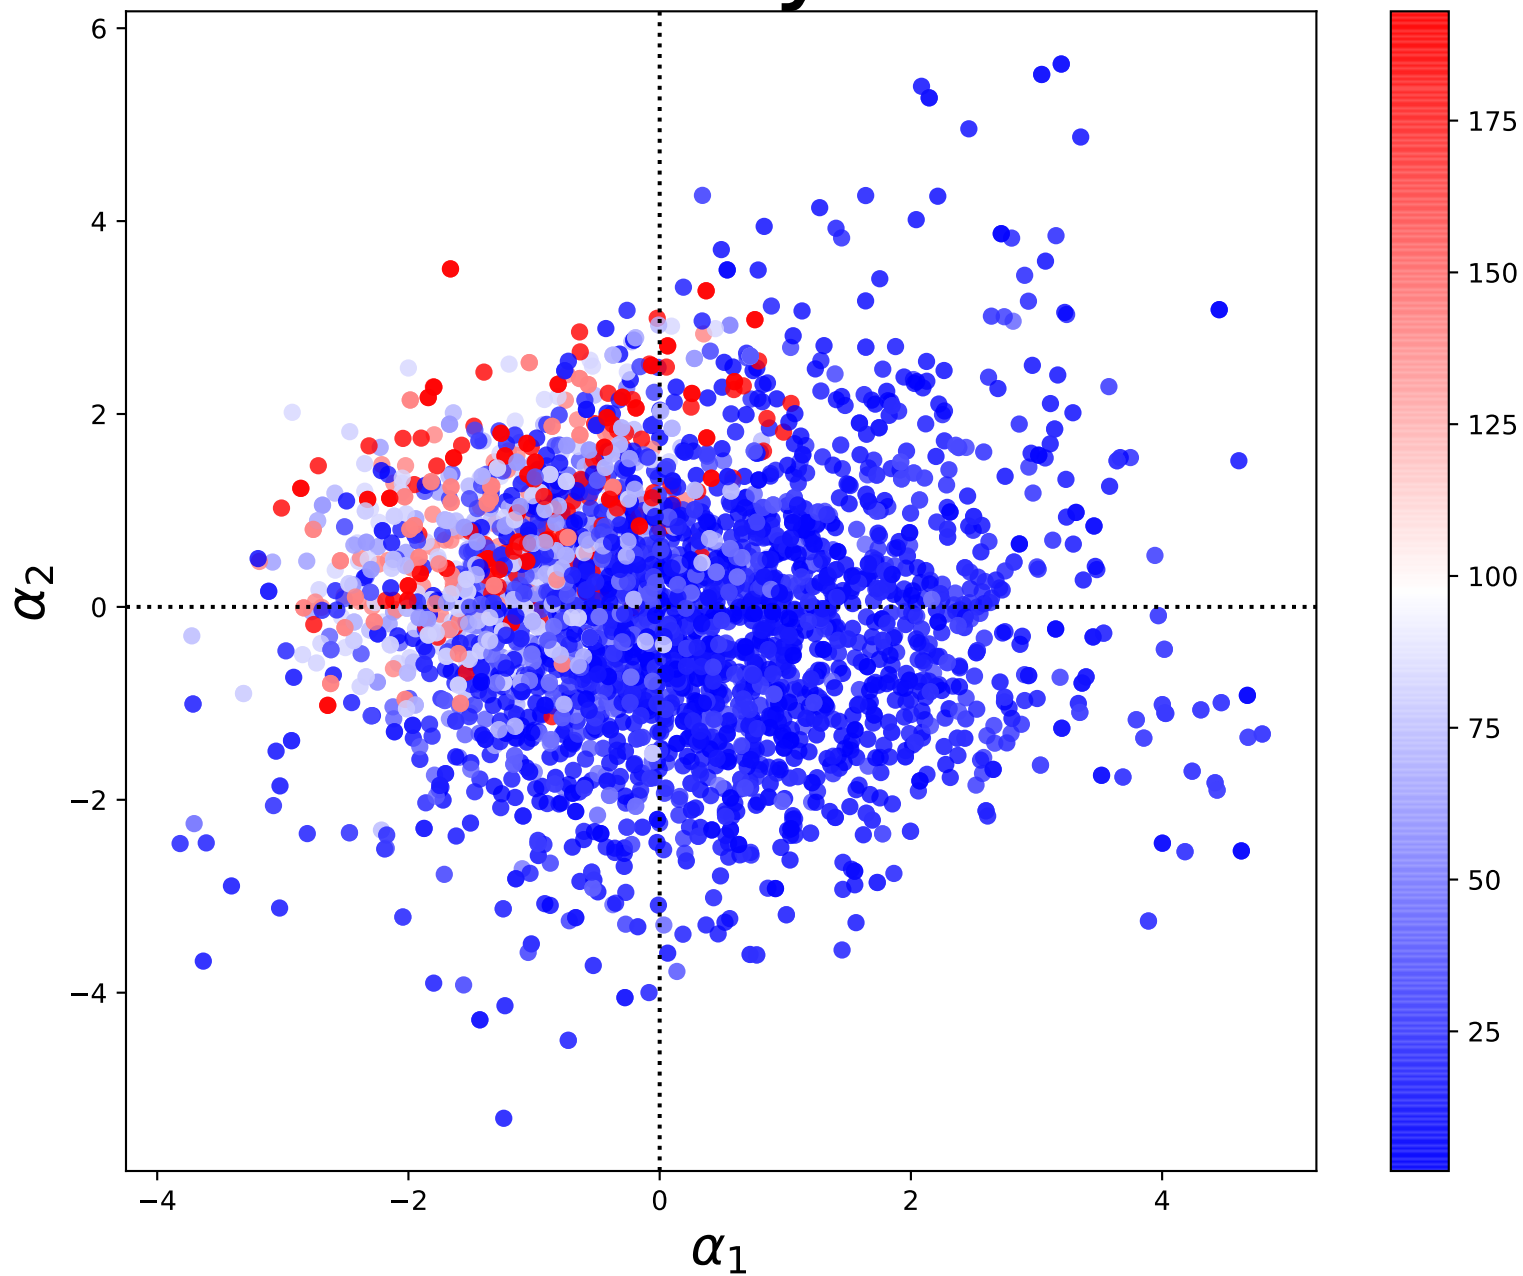

Supplement: OptionalSupplementaryData [file wf_aniso_retrobert_12.pdf › plots/appendix_plots/wf_aniso_retrobert_12.pdf]

# BERT Layer 2

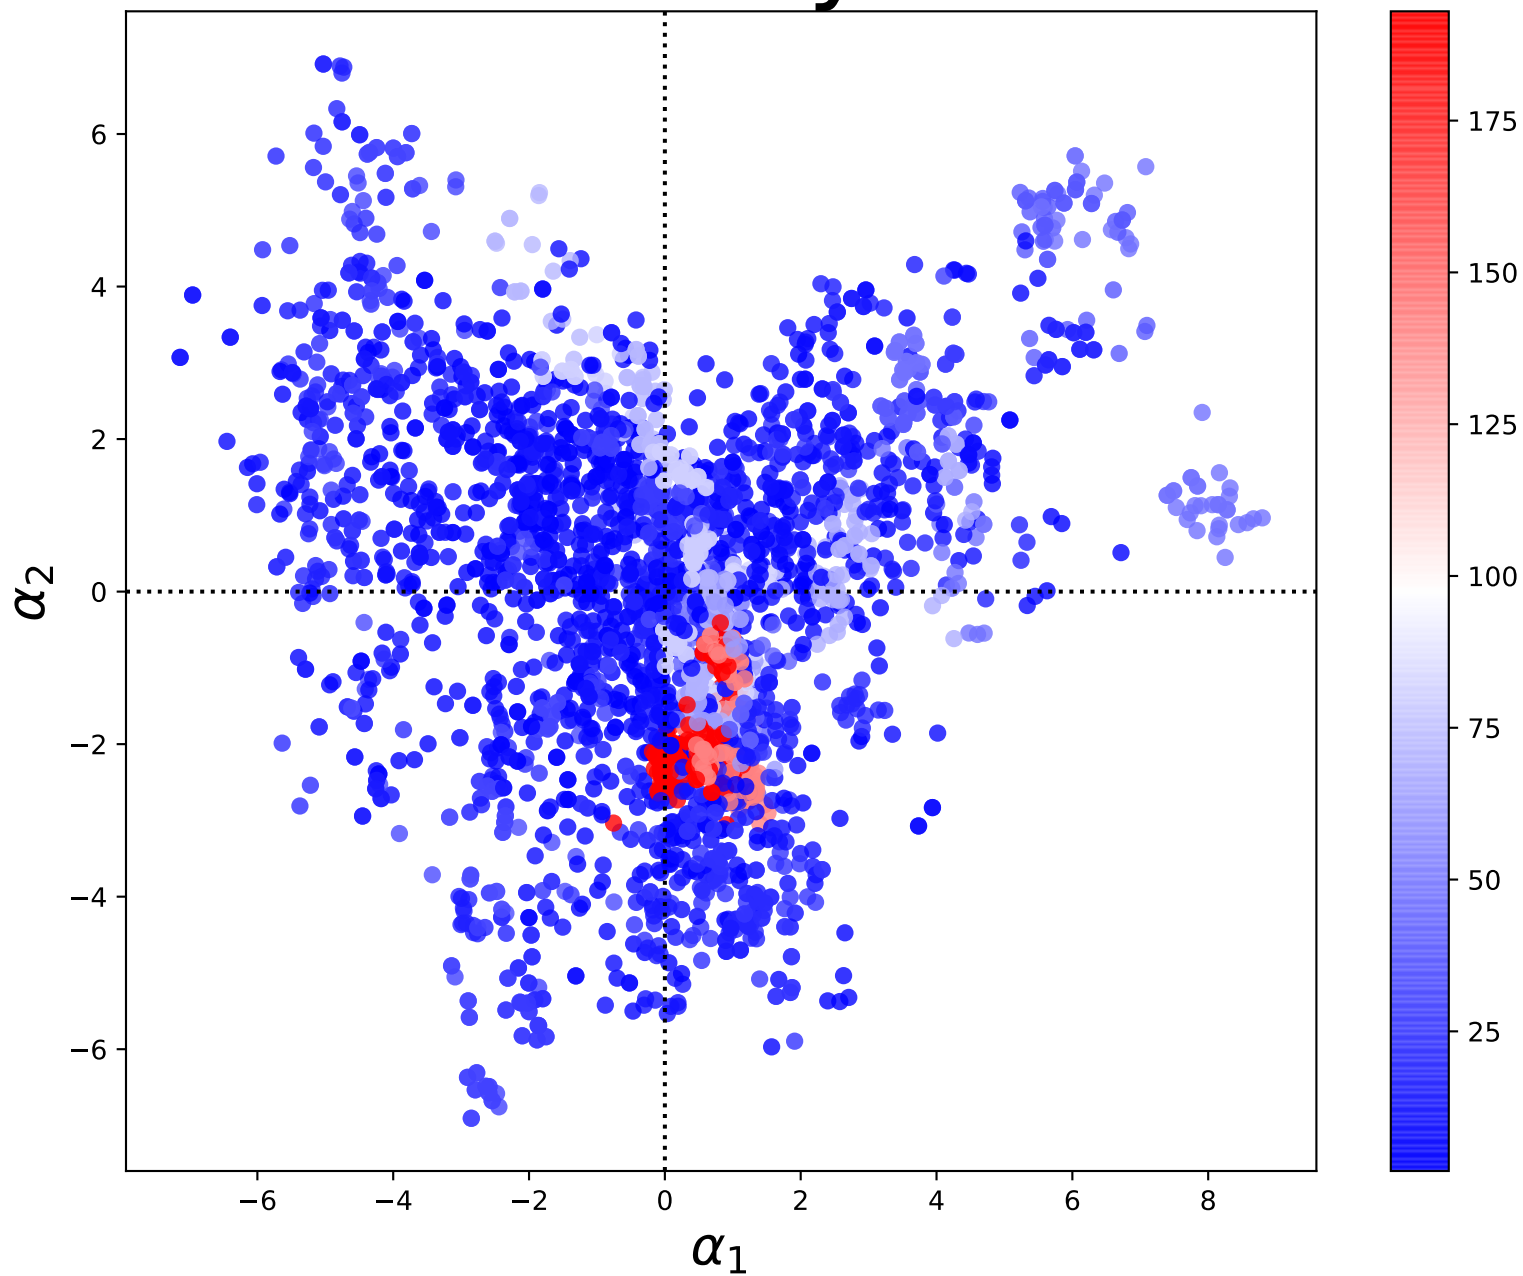

Supplement: OptionalSupplementaryData [file wf_aniso_retrobert_2.pdf › plots/appendix_plots/wf_aniso_retrobert_2.pdf]

# BERT Layer 3

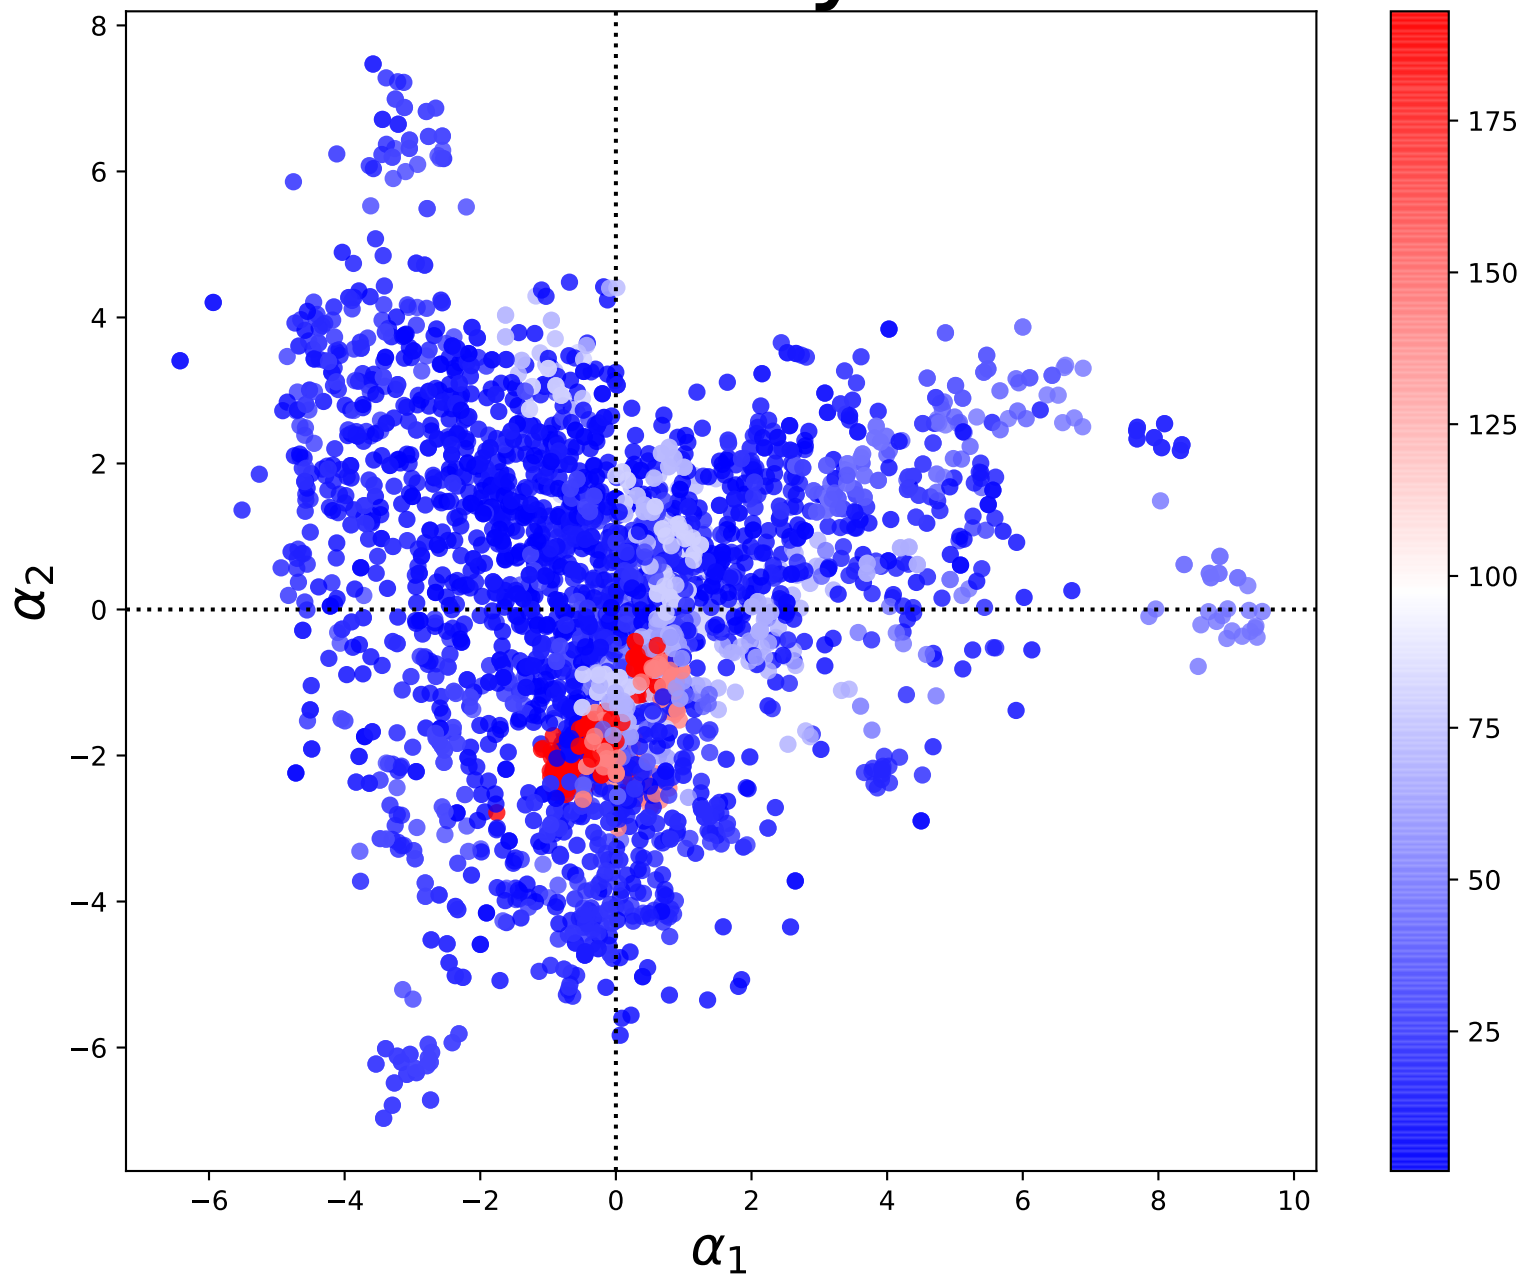

Supplement: OptionalSupplementaryData [file wf_aniso_retrobert_3.pdf › plots/appendix_plots/wf_aniso_retrobert_3.pdf]

# BERT Layer 4

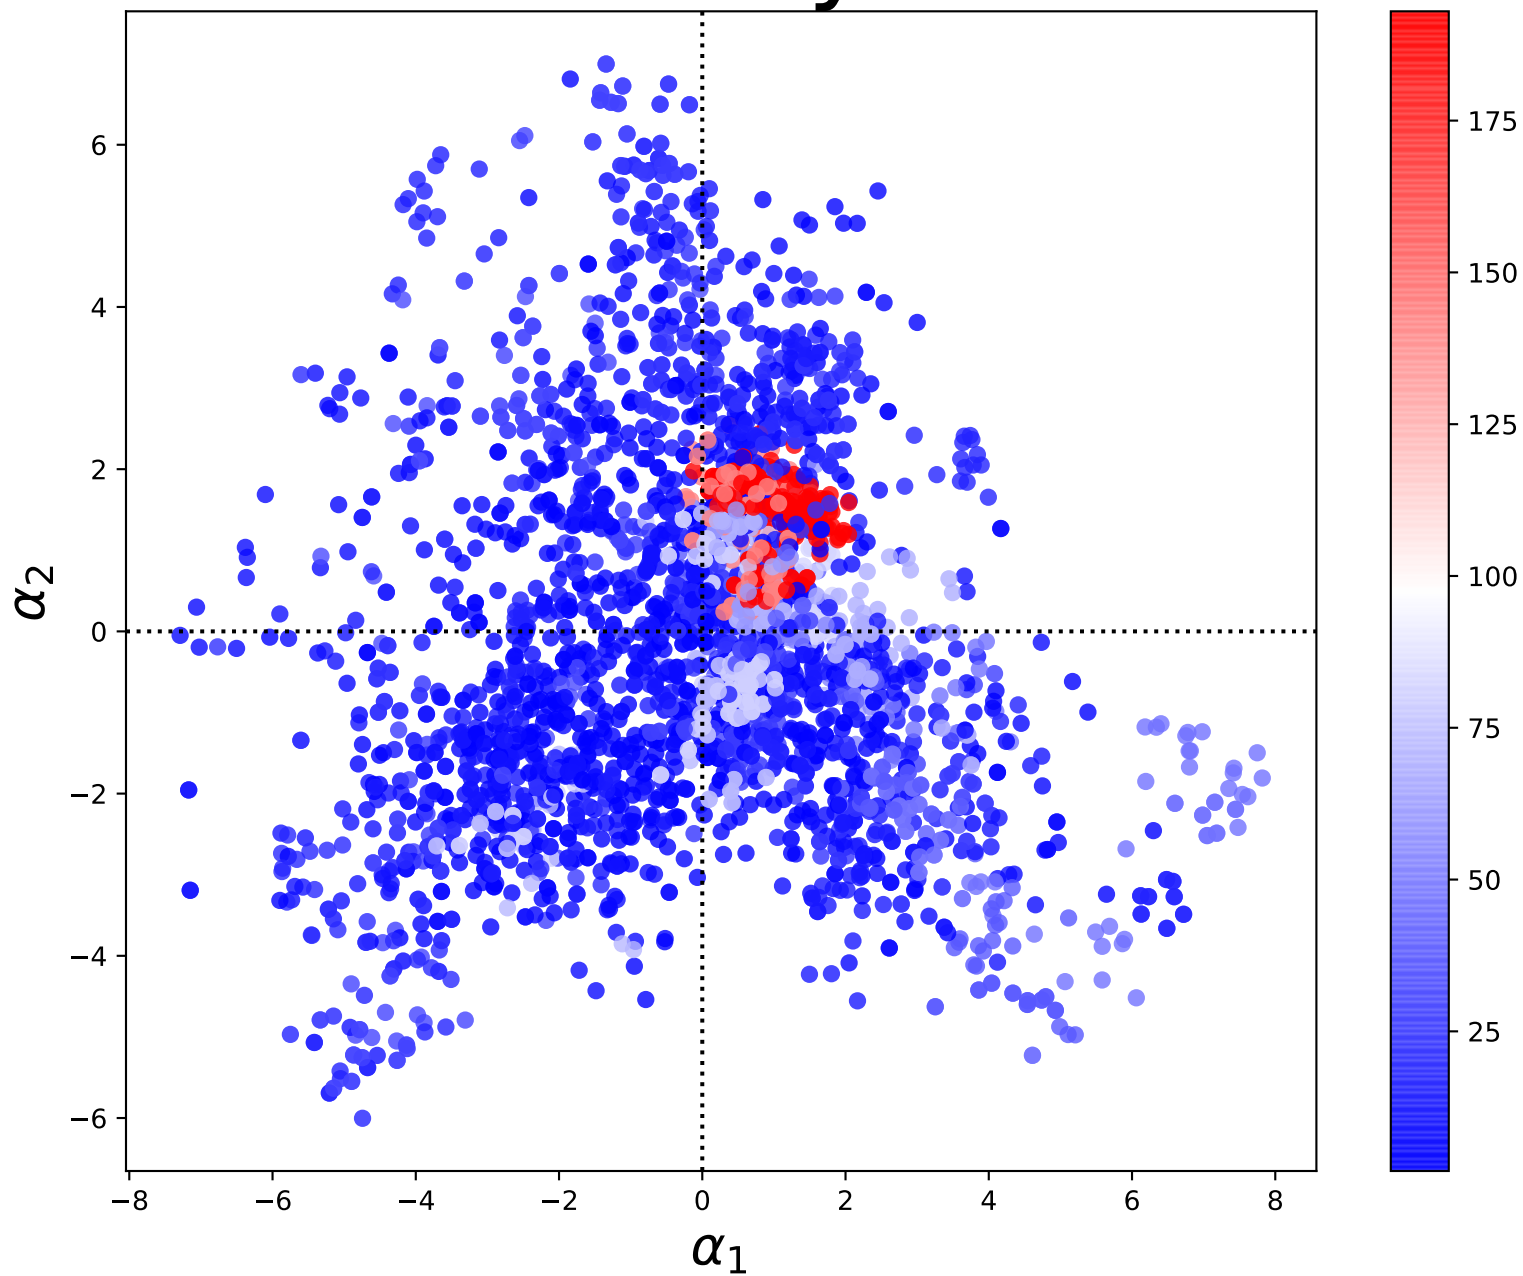

Supplement: OptionalSupplementaryData [file wf_aniso_retrobert_4.pdf › plots/appendix_plots/wf_aniso_retrobert_4.pdf]

# BERT Layer 5

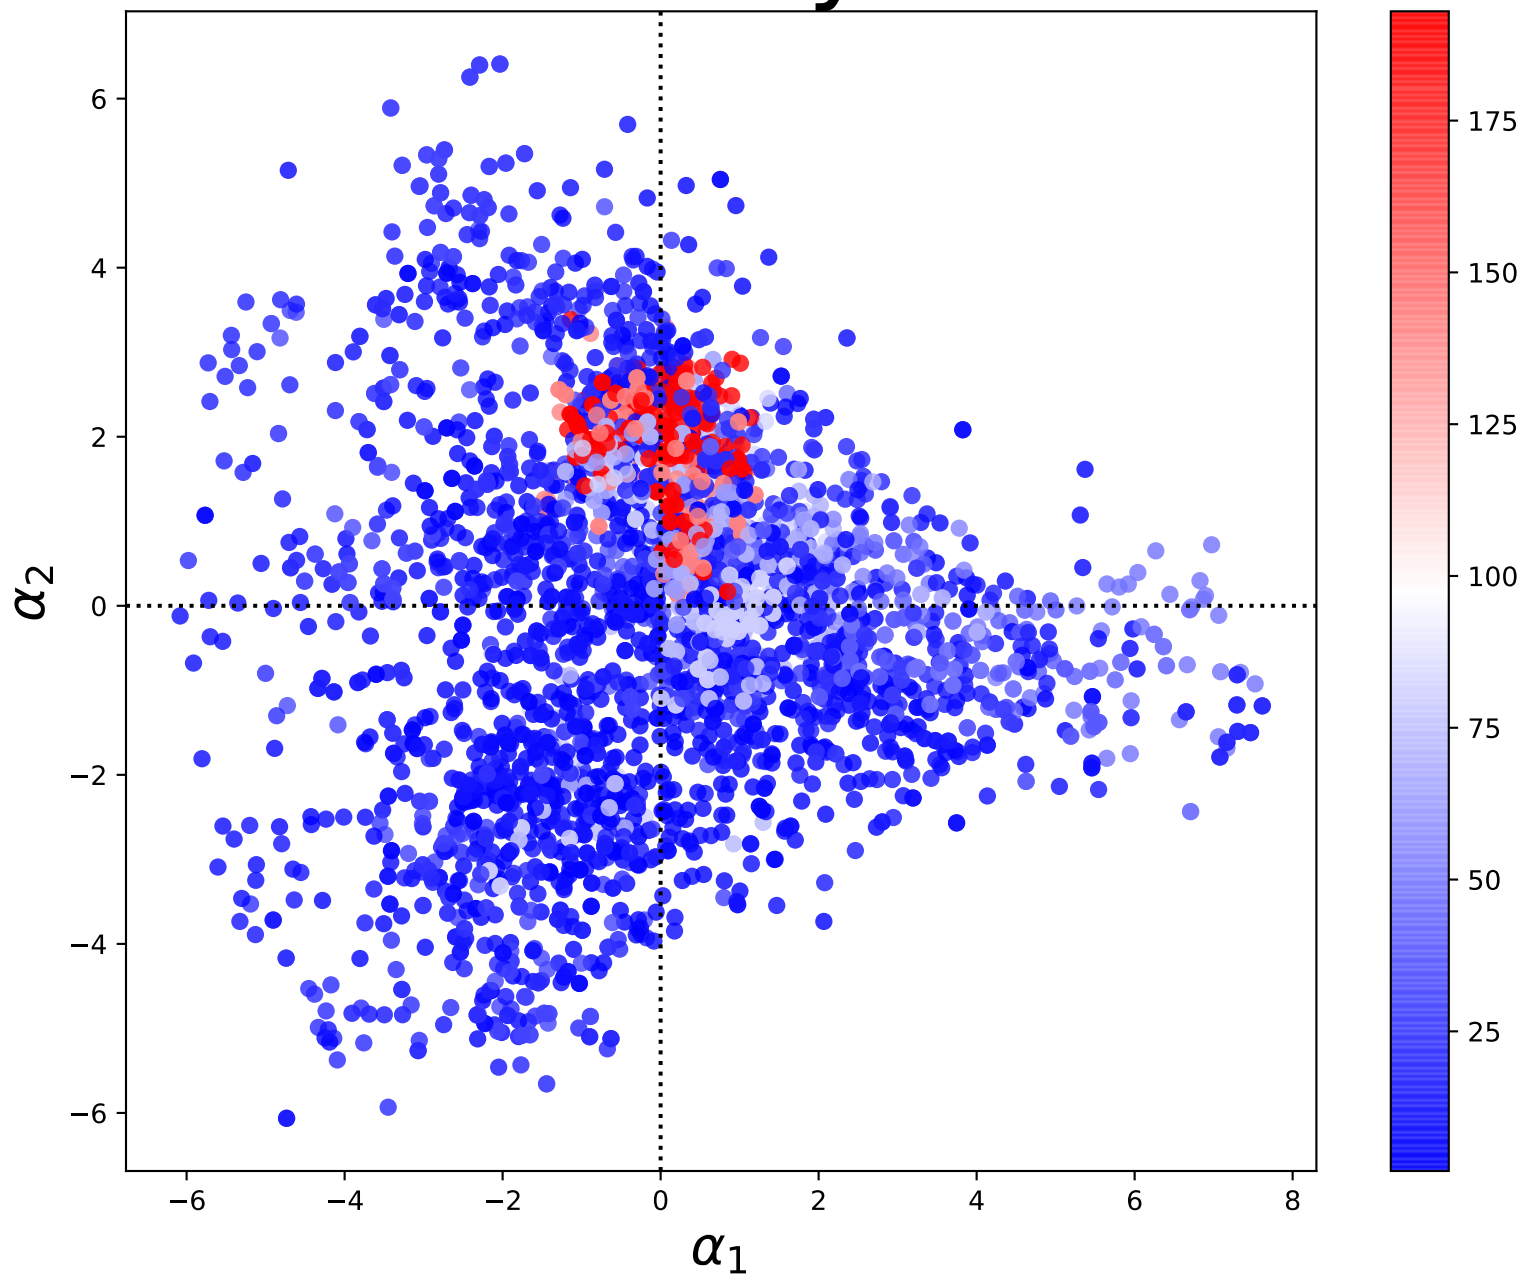

Supplement: OptionalSupplementaryData [file wf_aniso_retrobert_5.pdf › plots/appendix_plots/wf_aniso_retrobert_5.pdf]

# BERT Layer 6

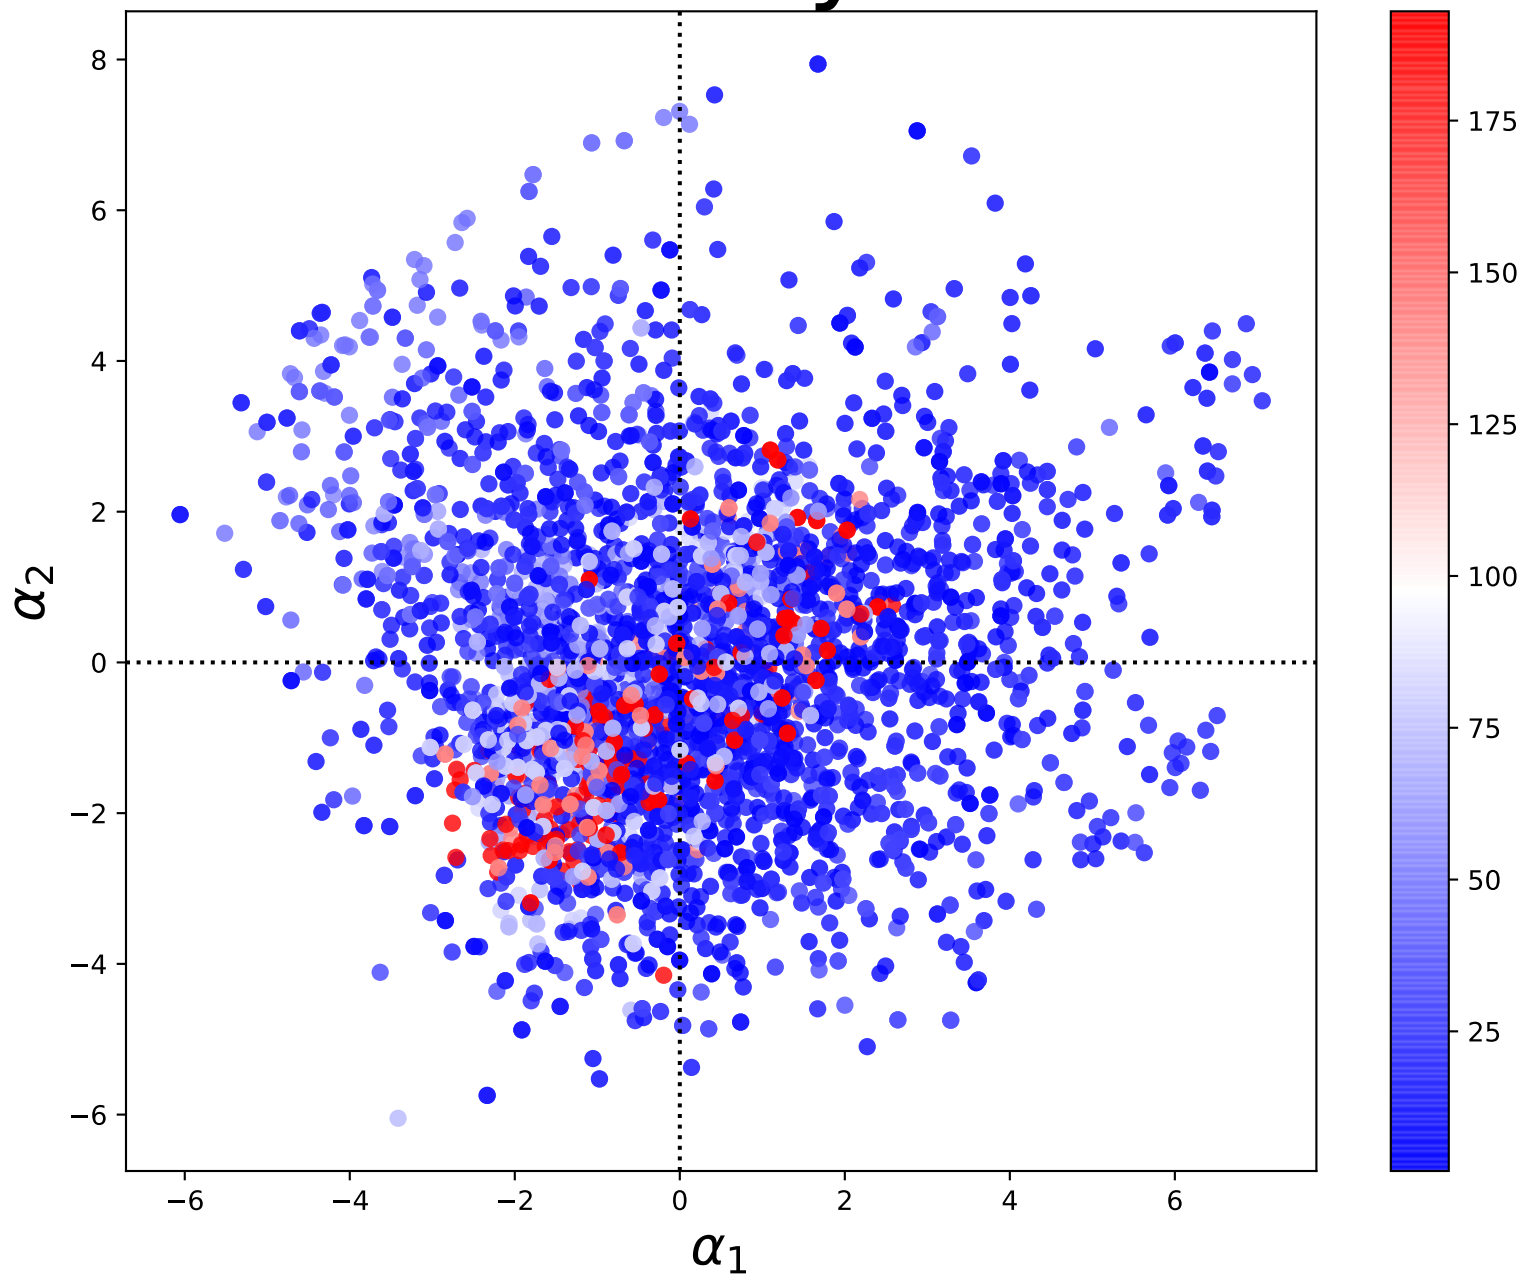

Supplement: OptionalSupplementaryData [file wf_aniso_retrobert_6.pdf › plots/appendix_plots/wf_aniso_retrobert_6.pdf]

# BERT Layer 7

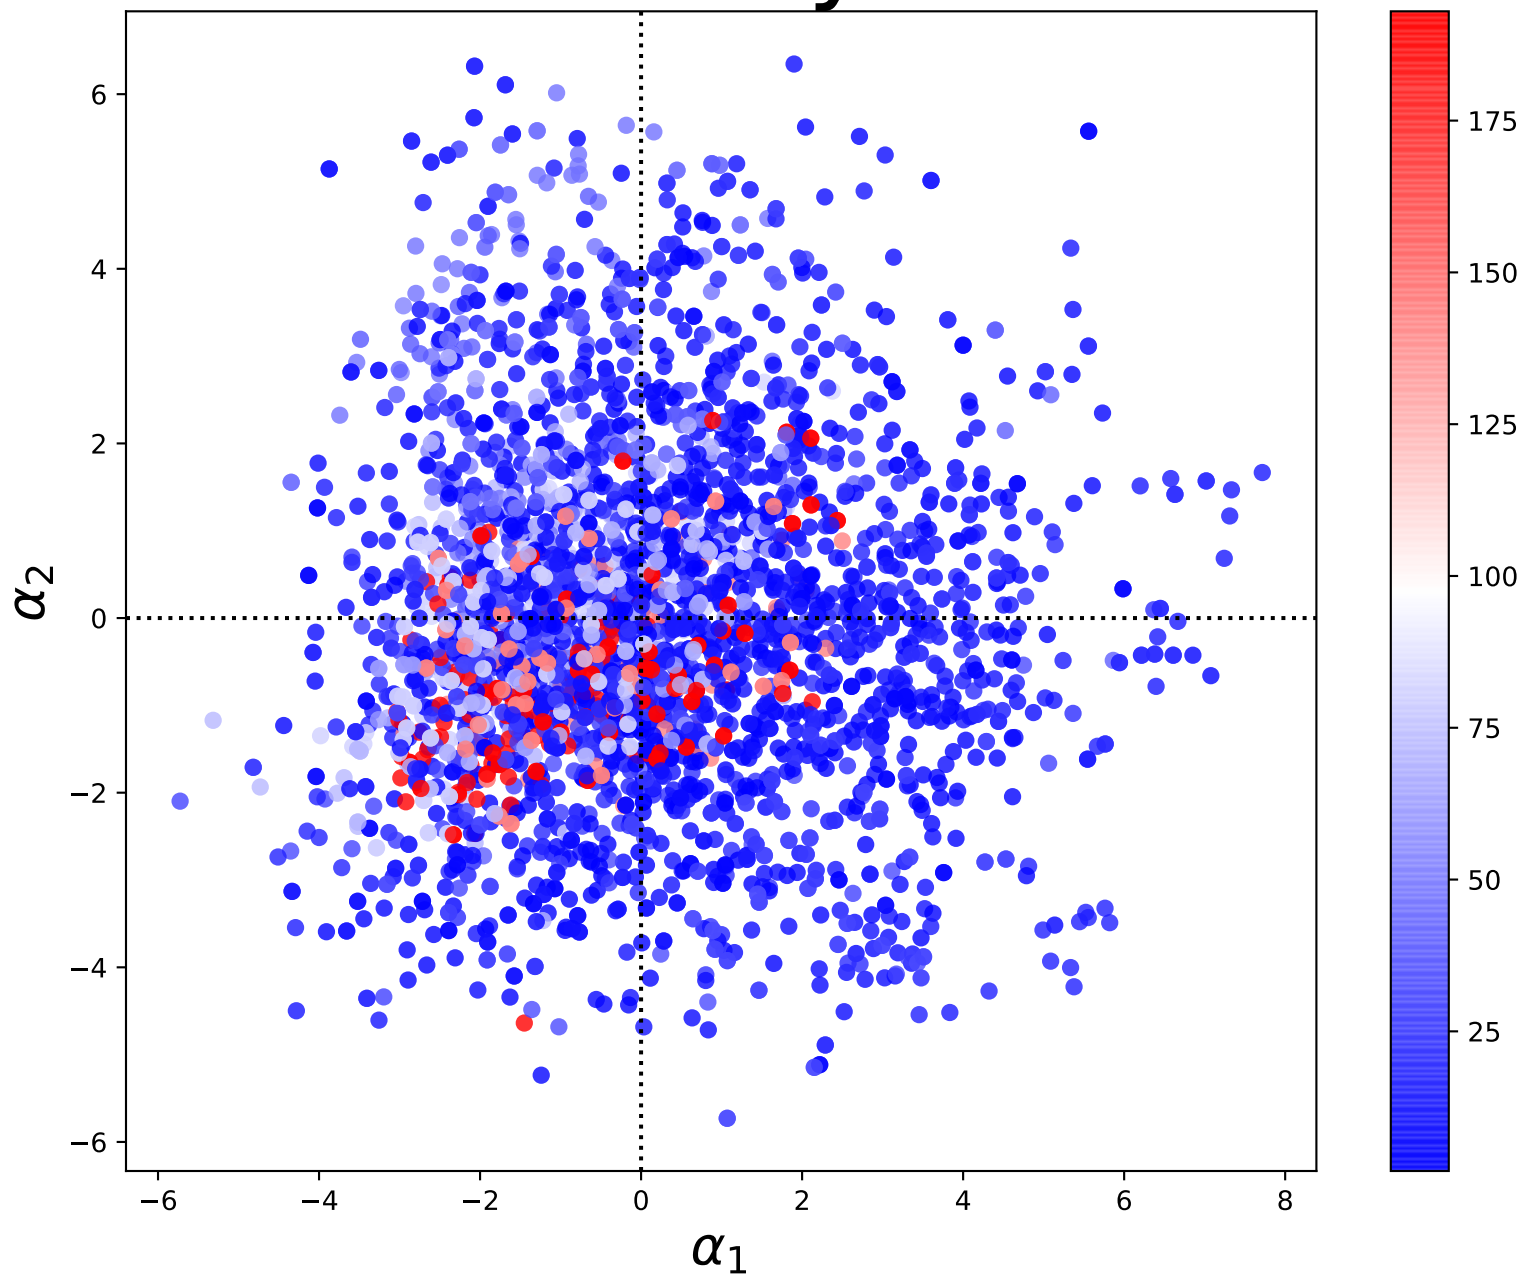

Supplement: OptionalSupplementaryData [file wf_aniso_retrobert_7.pdf › plots/appendix_plots/wf_aniso_retrobert_7.pdf]

# BERT Layer 8

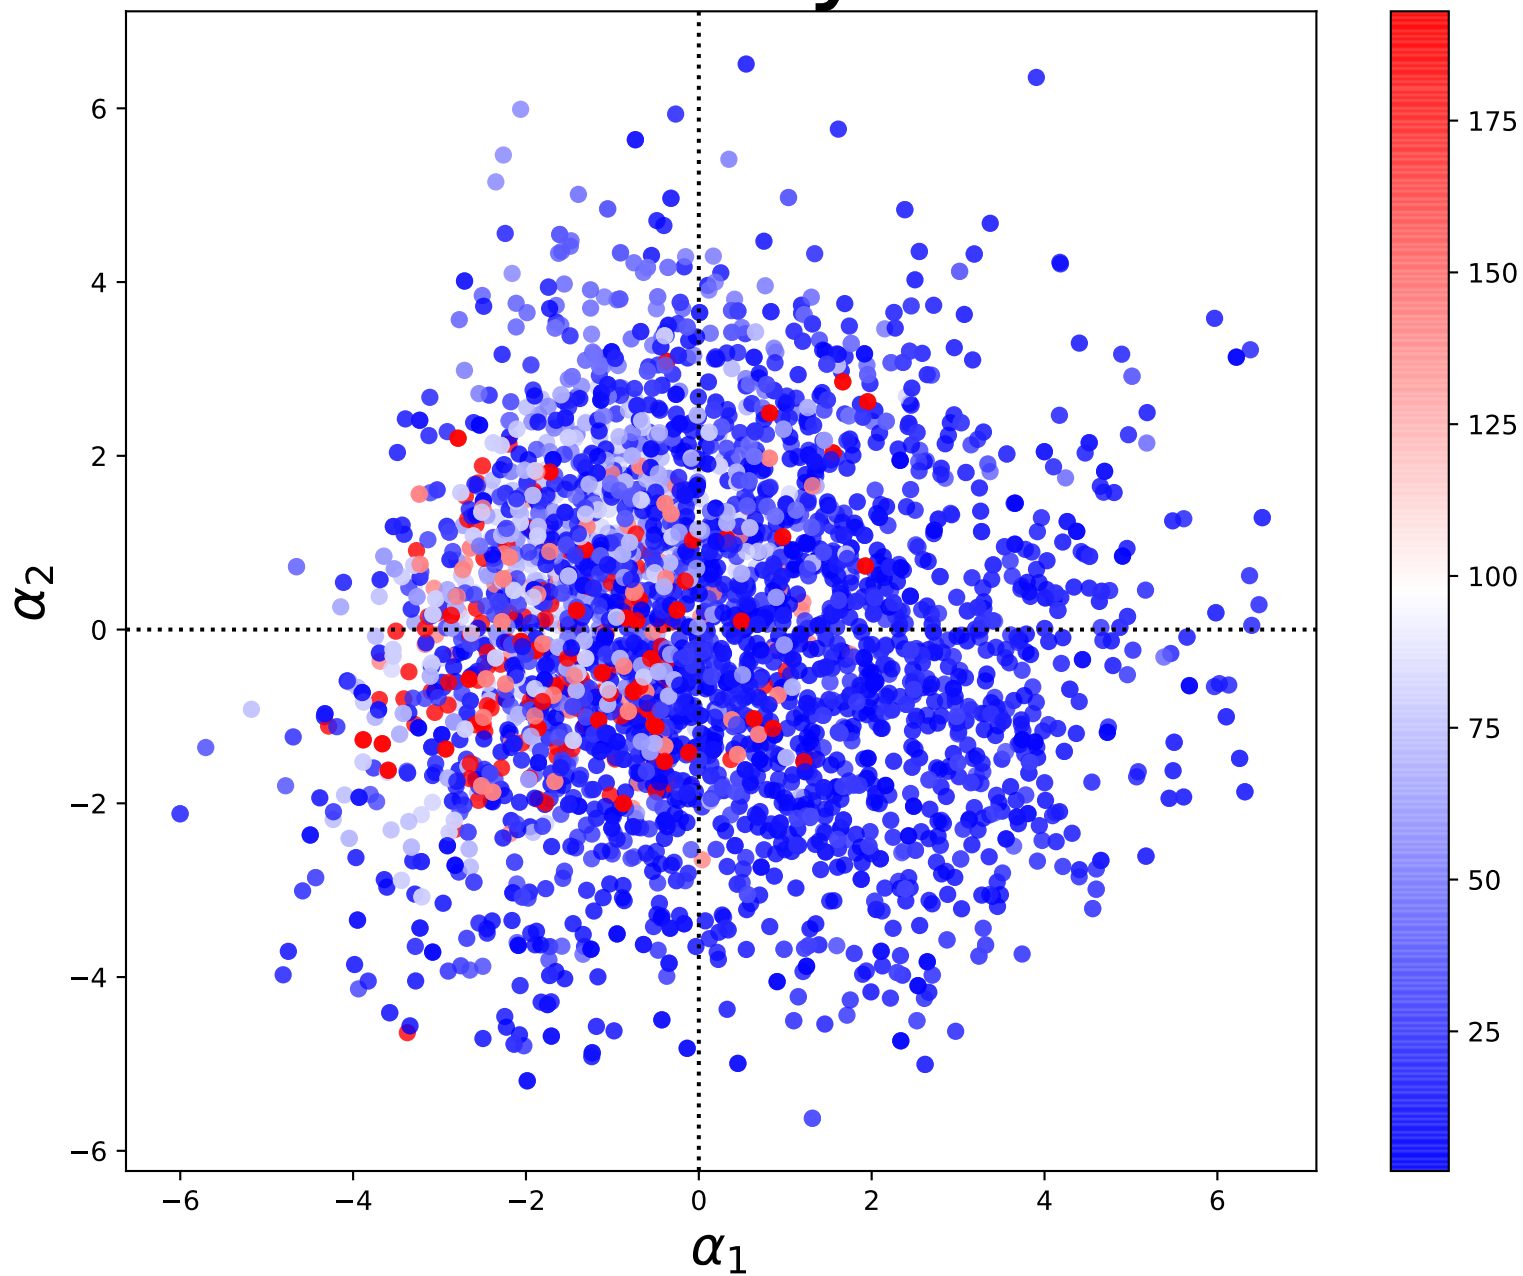

Supplement: OptionalSupplementaryData [file wf_aniso_retrobert_8.pdf › plots/appendix_plots/wf_aniso_retrobert_8.pdf]

# BERT Layer 9

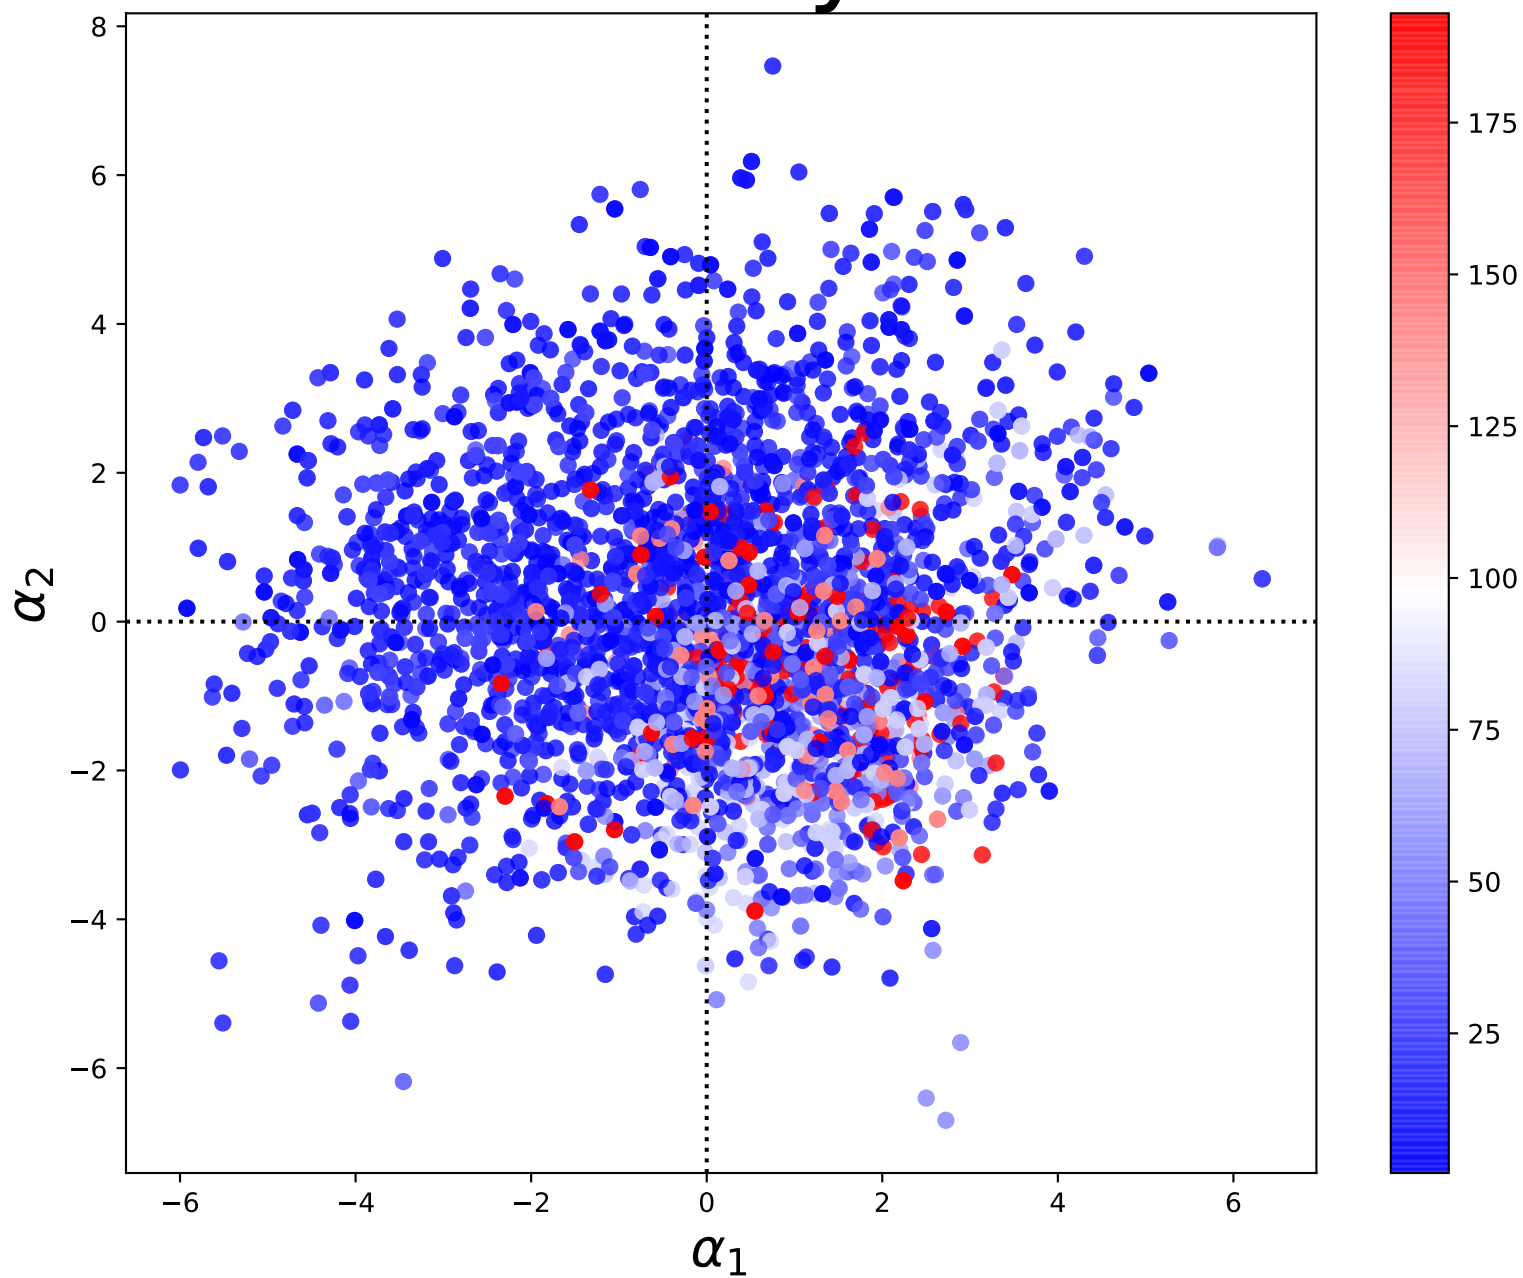

Supplement: OptionalSupplementaryData [file wf_aniso_retrobert_9.pdf › plots/appendix_plots/wf_aniso_retrobert_9.pdf]

# ELECTRA Layer 0

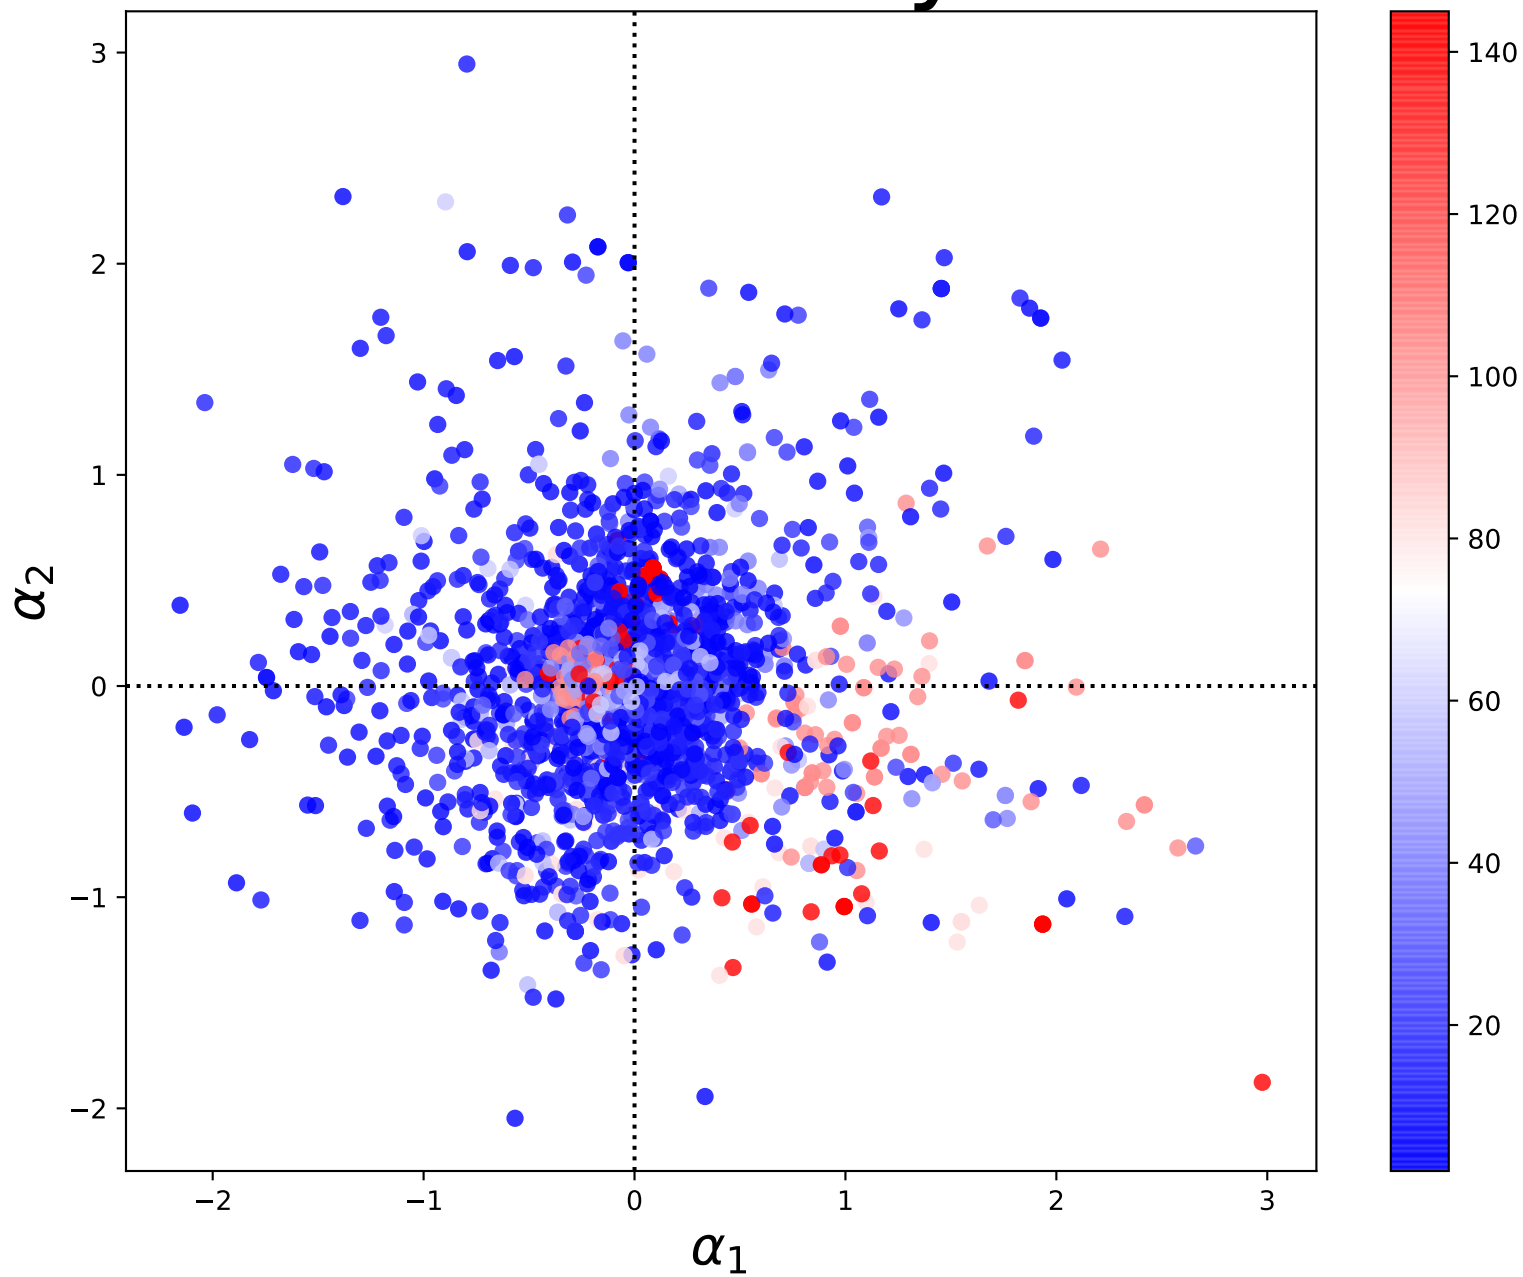

Supplement: OptionalSupplementaryData [file wf_aniso_retroelectra_0.pdf › plots/appendix_plots/wf_aniso_retroelectra_0.pdf]

# ELECTRA Layer 1

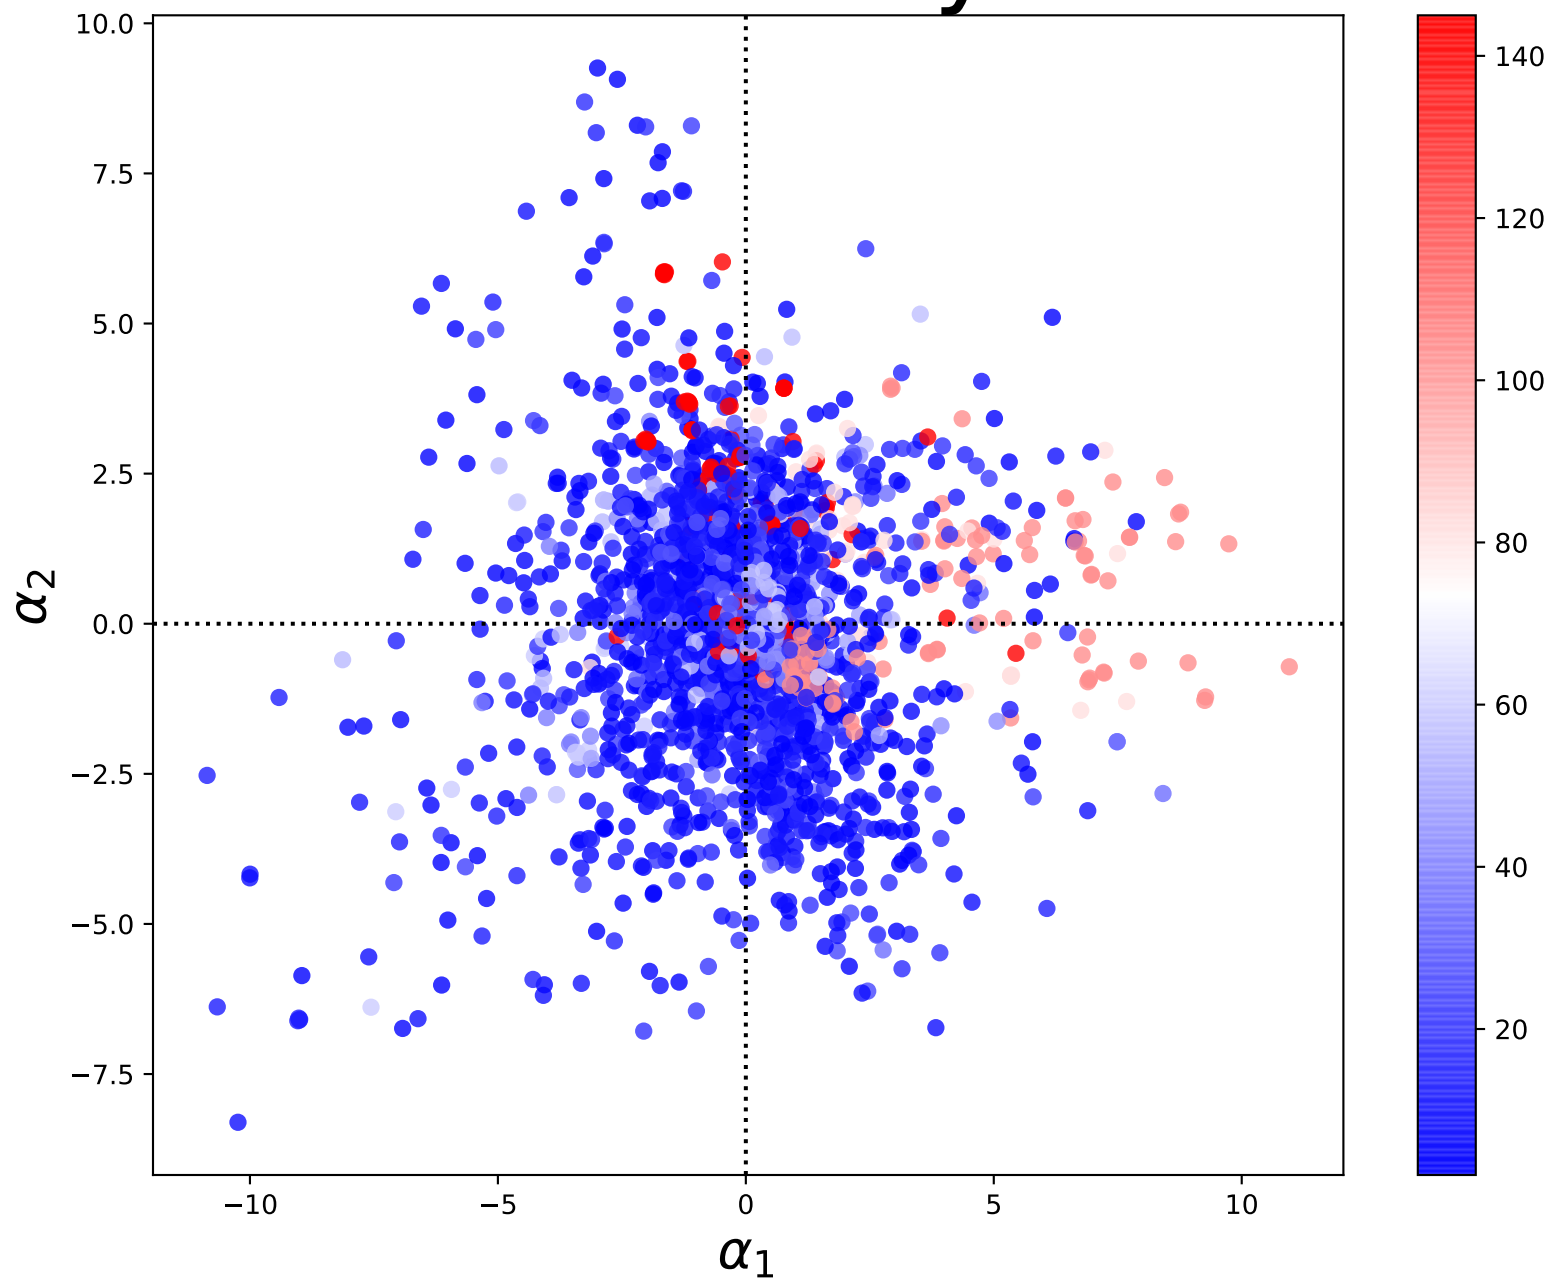

Supplement: OptionalSupplementaryData [file wf_aniso_retroelectra_1.pdf › plots/appendix_plots/wf_aniso_retroelectra_1.pdf]

# ELECTRA Layer 10

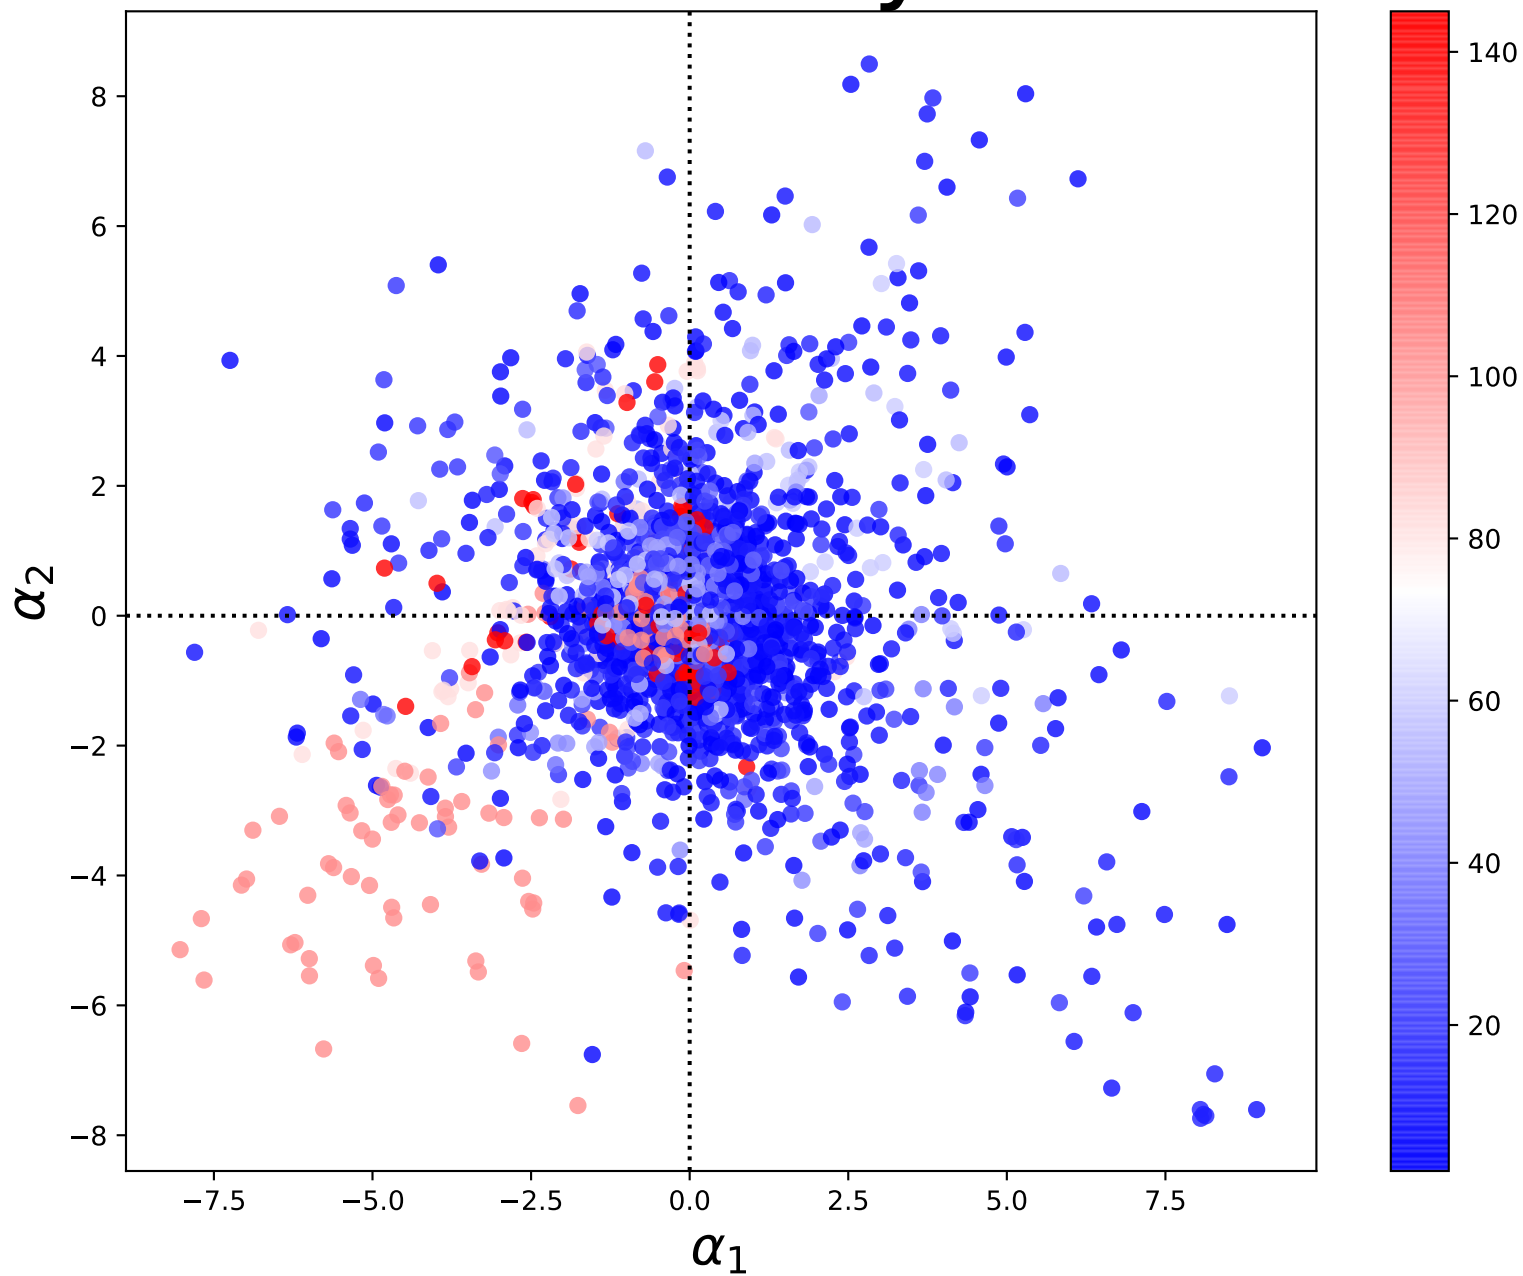

Supplement: OptionalSupplementaryData [file wf_aniso_retroelectra_10.pdf › plots/appendix_plots/wf_aniso_retroelectra_10.pdf]

# ELECTRA Layer 11

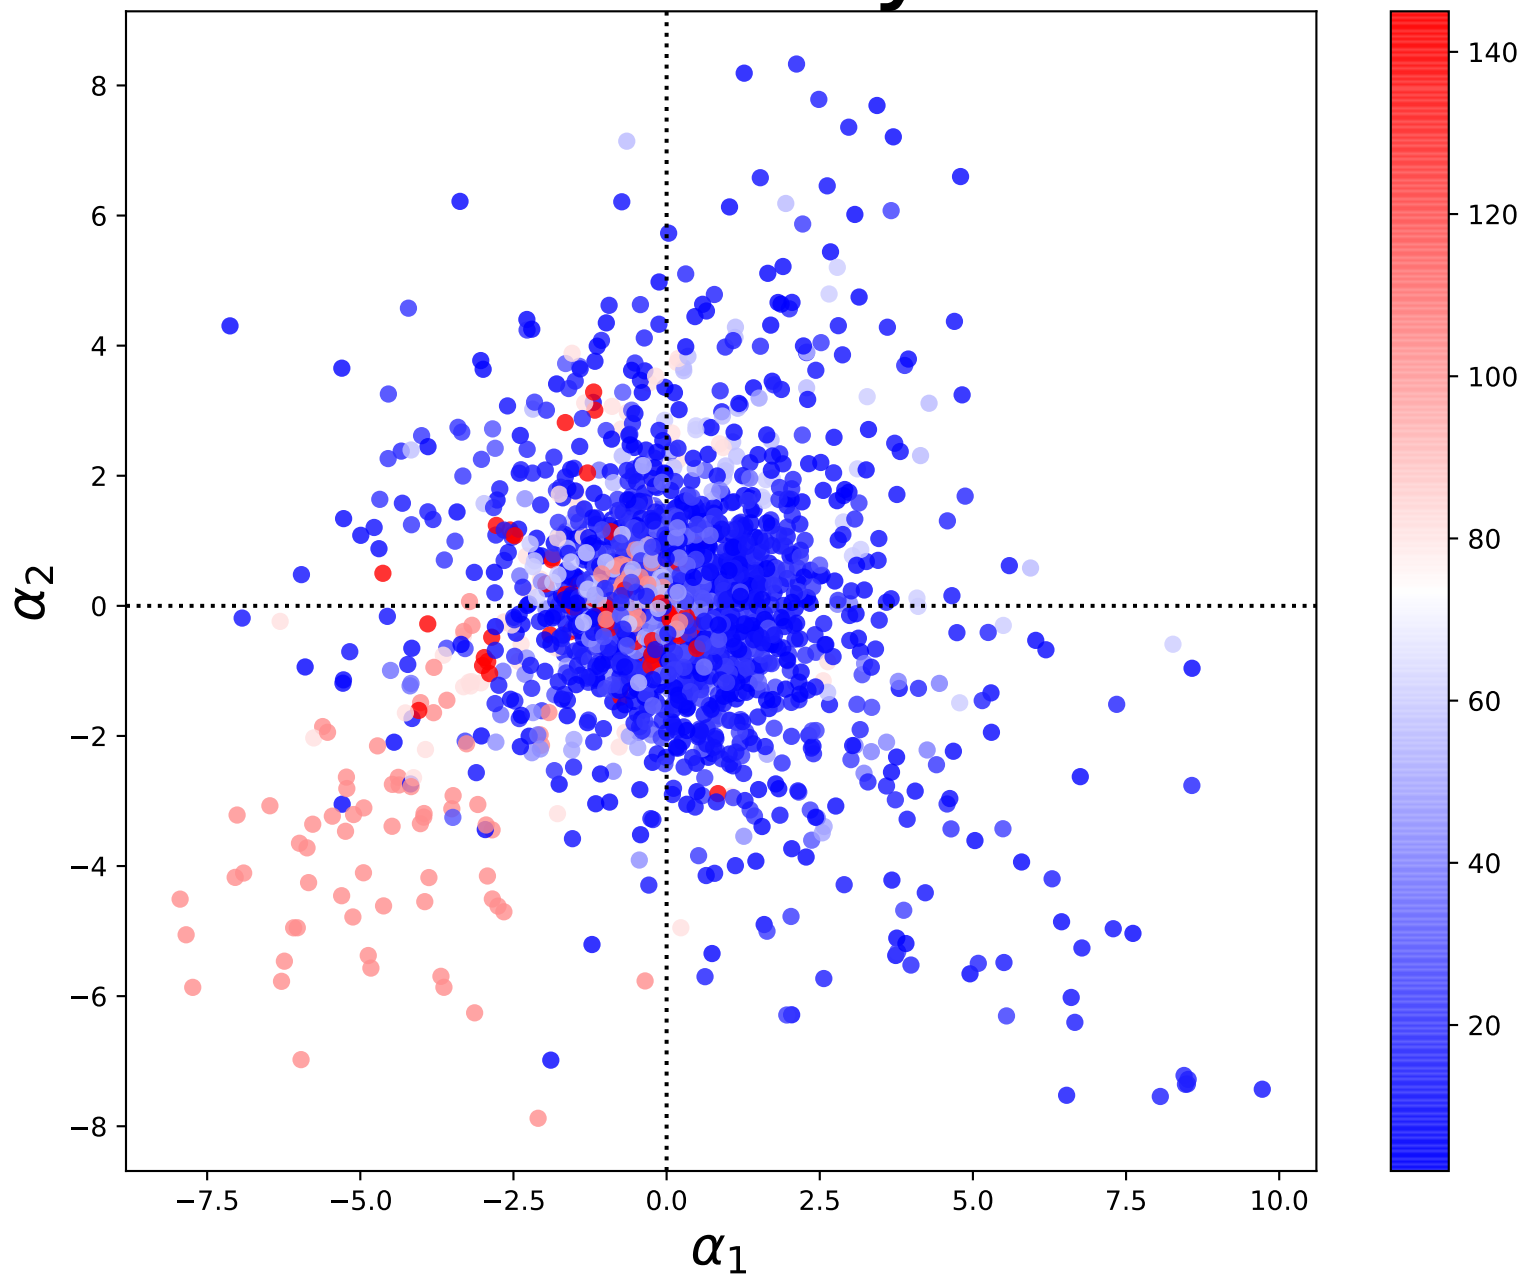

Supplement: OptionalSupplementaryData [file wf_aniso_retroelectra_11.pdf › plots/appendix_plots/wf_aniso_retroelectra_11.pdf]

# ELECTRA Layer 12

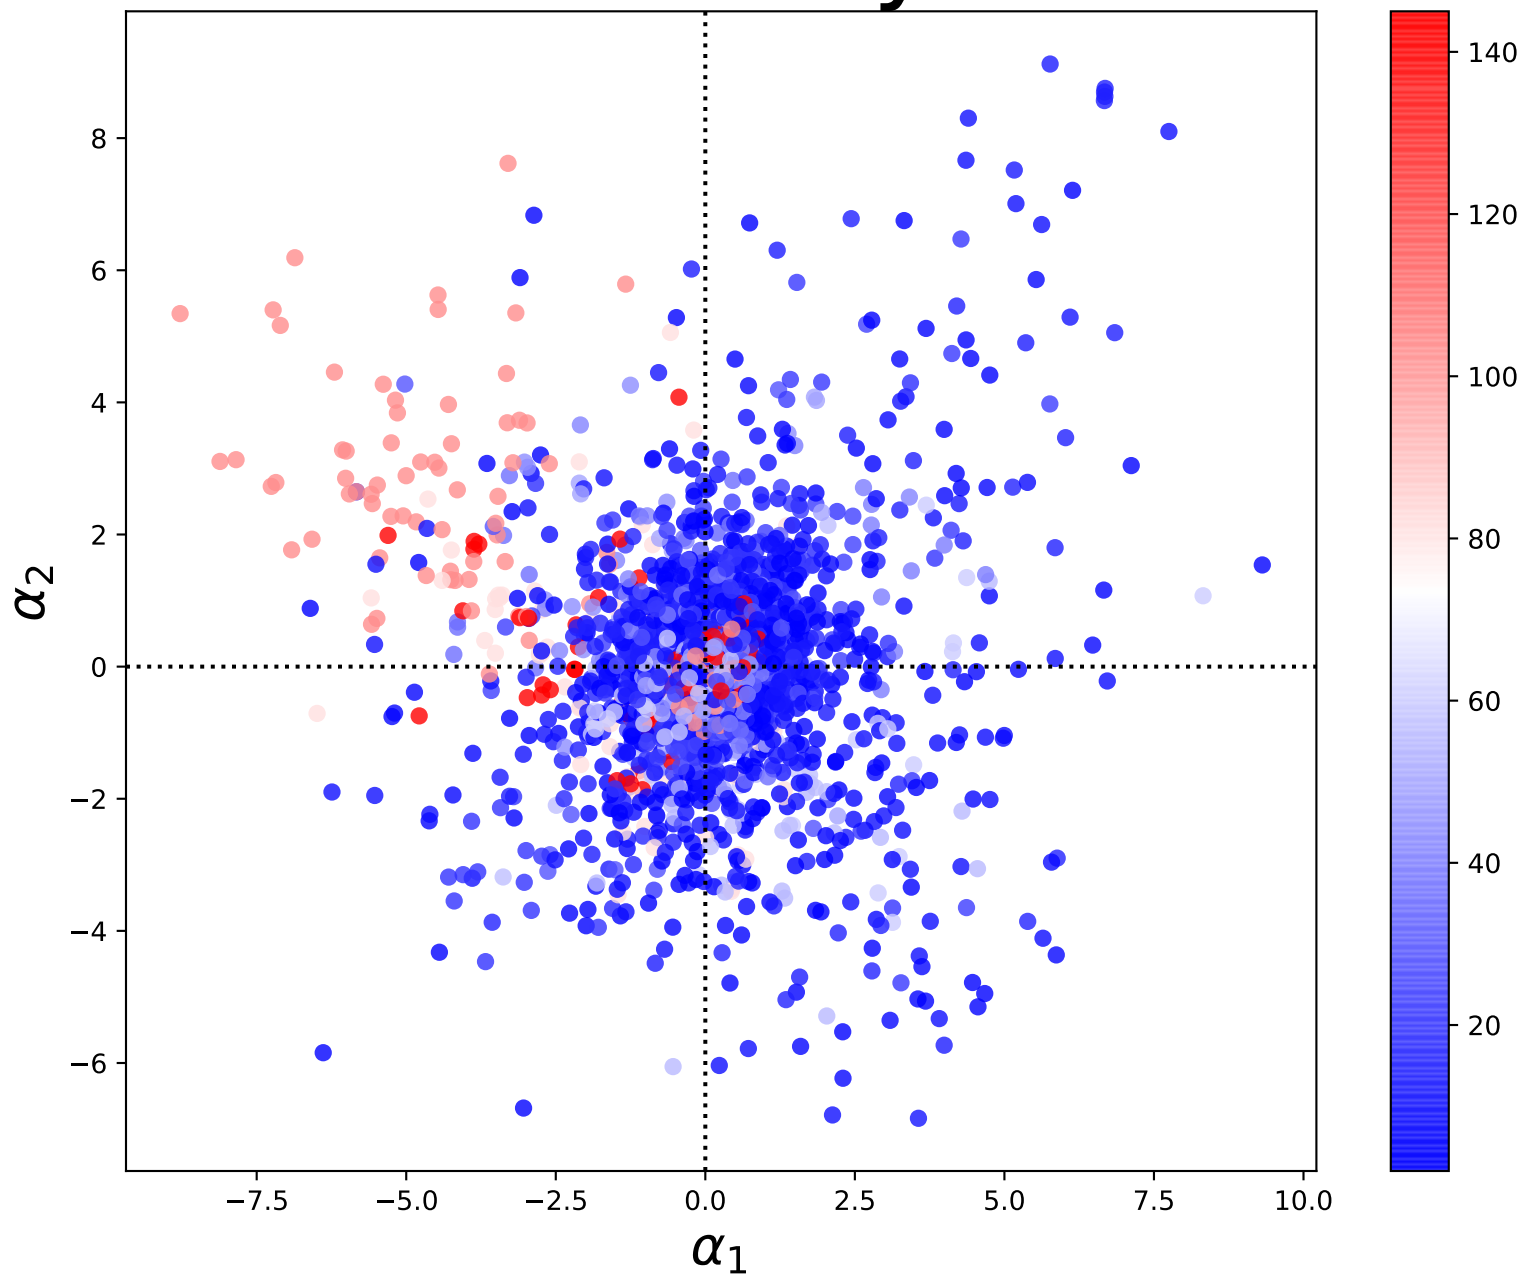

Supplement: OptionalSupplementaryData [file wf_aniso_retroelectra_12.pdf › plots/appendix_plots/wf_aniso_retroelectra_12.pdf]

# ELECTRA Layer 2

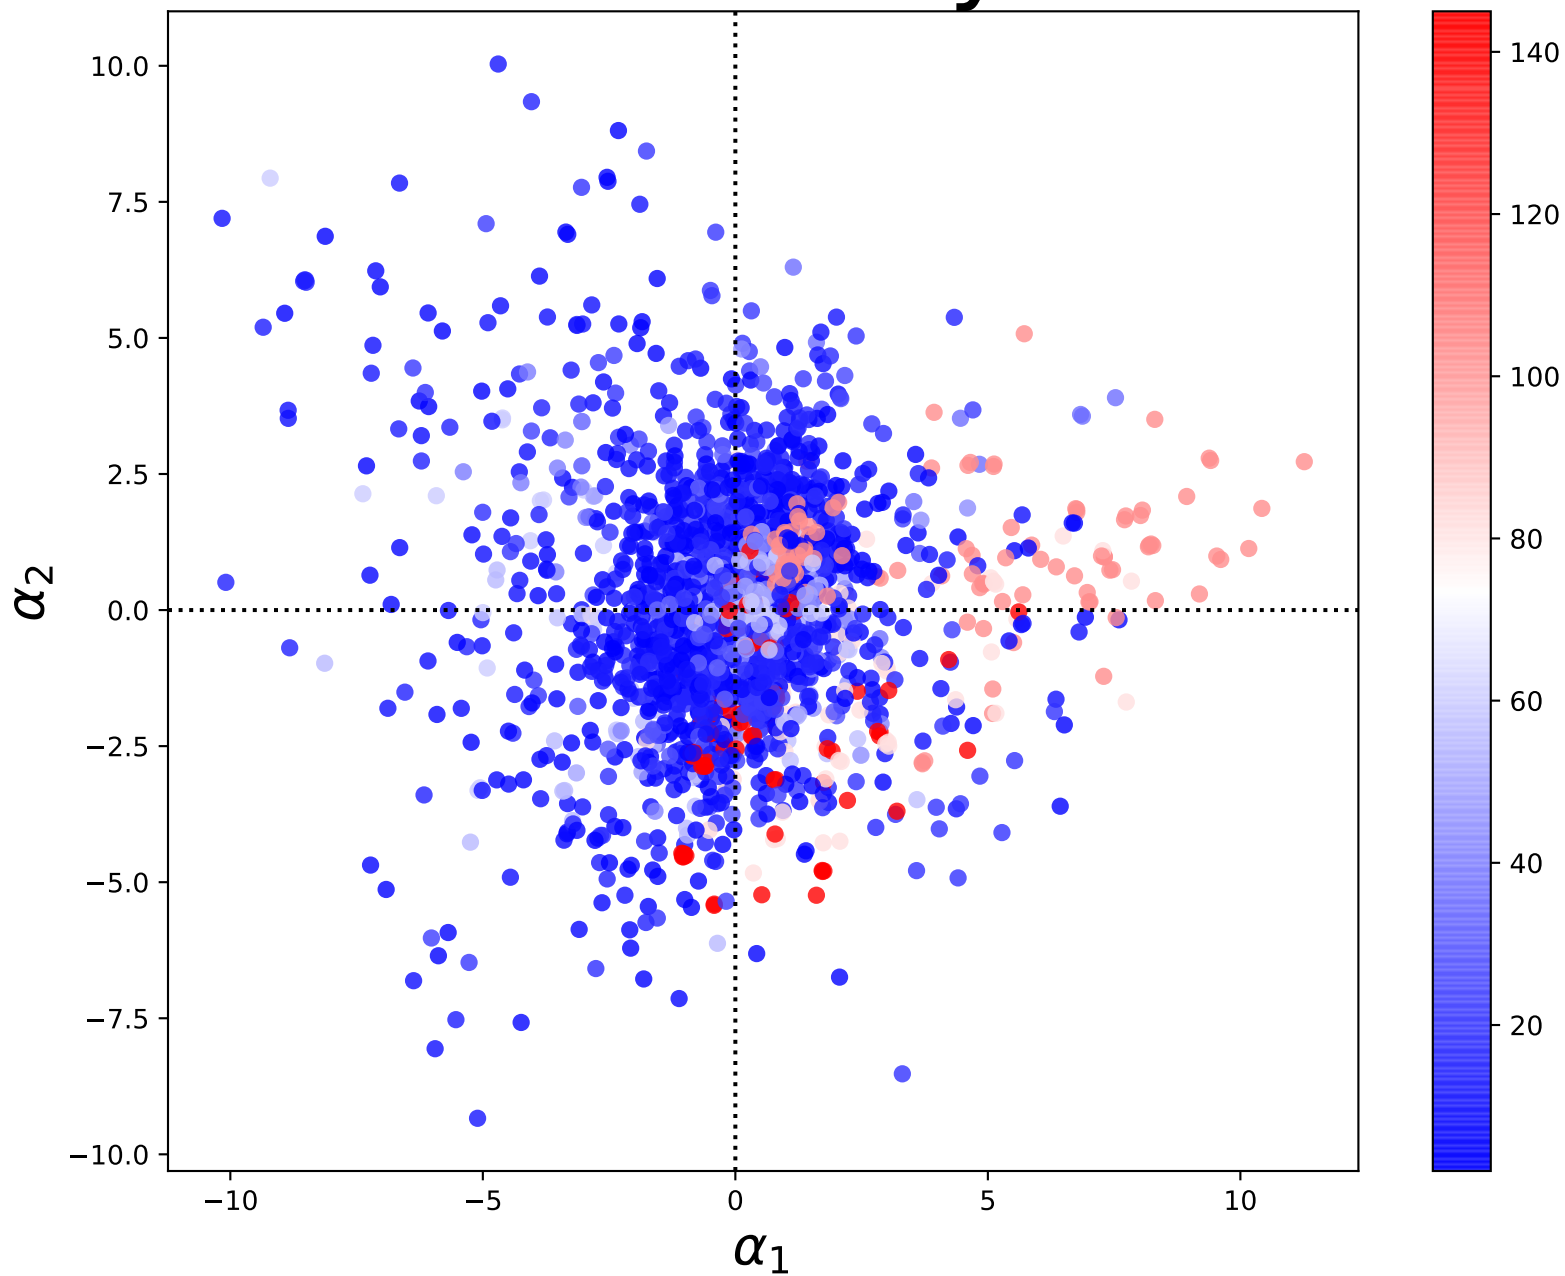

Supplement: OptionalSupplementaryData [file wf_aniso_retroelectra_2.pdf › plots/appendix_plots/wf_aniso_retroelectra_2.pdf]

# ELECTRA Layer 3

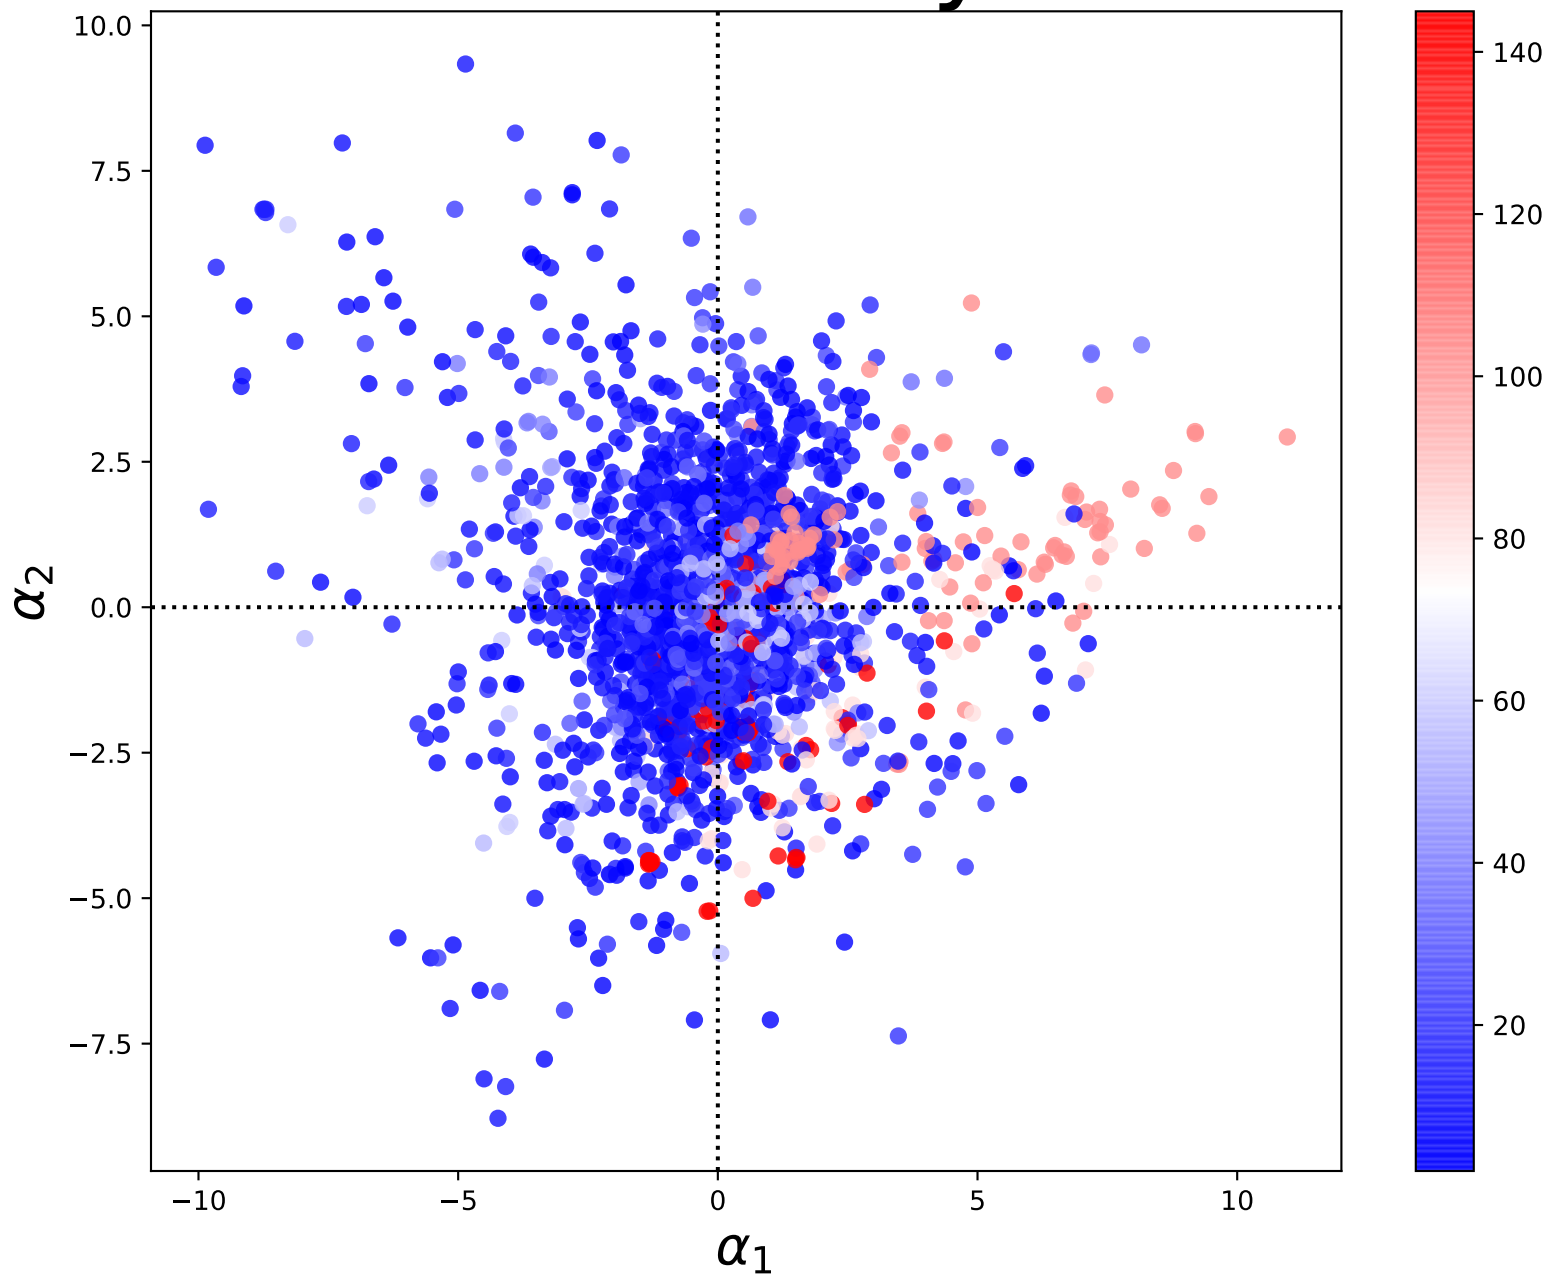

Supplement: OptionalSupplementaryData [file wf_aniso_retroelectra_3.pdf › plots/appendix_plots/wf_aniso_retroelectra_3.pdf]

# ELECTRA Layer 4

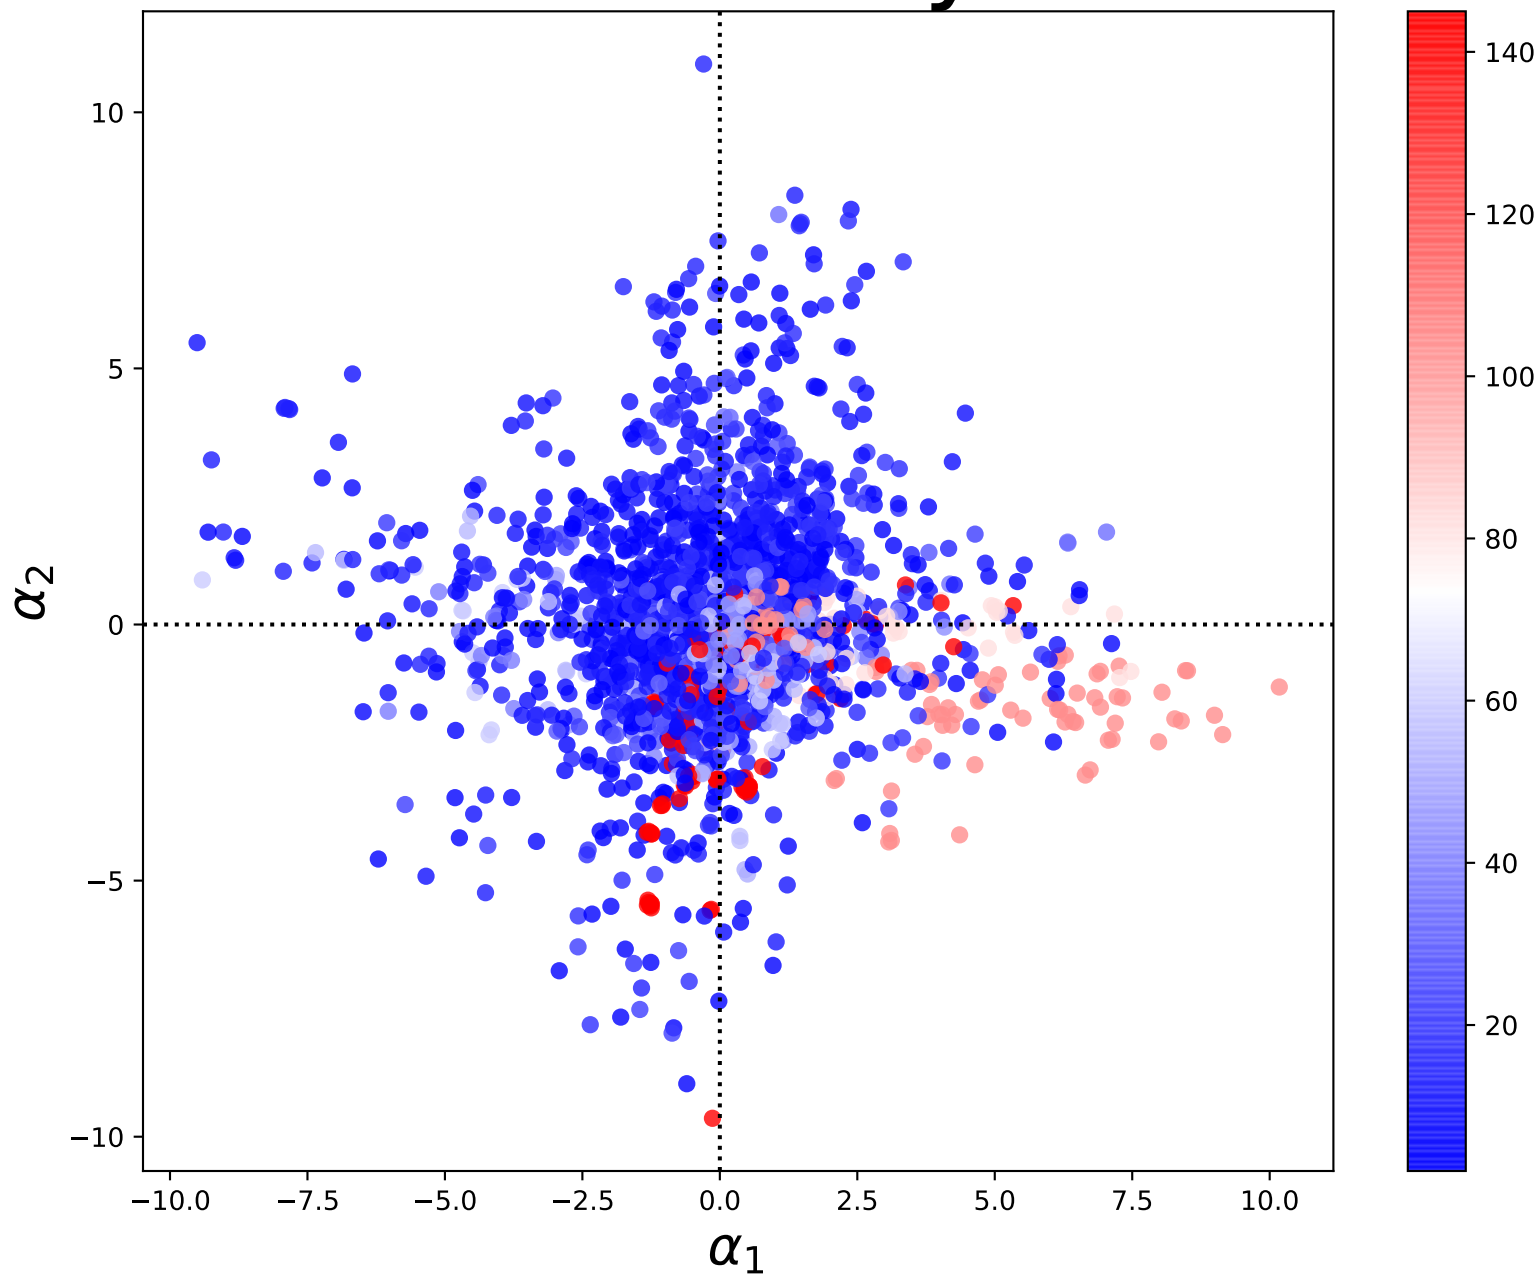

Supplement: OptionalSupplementaryData [file wf_aniso_retroelectra_4.pdf › plots/appendix_plots/wf_aniso_retroelectra_4.pdf]

# ELECTRA Layer 5

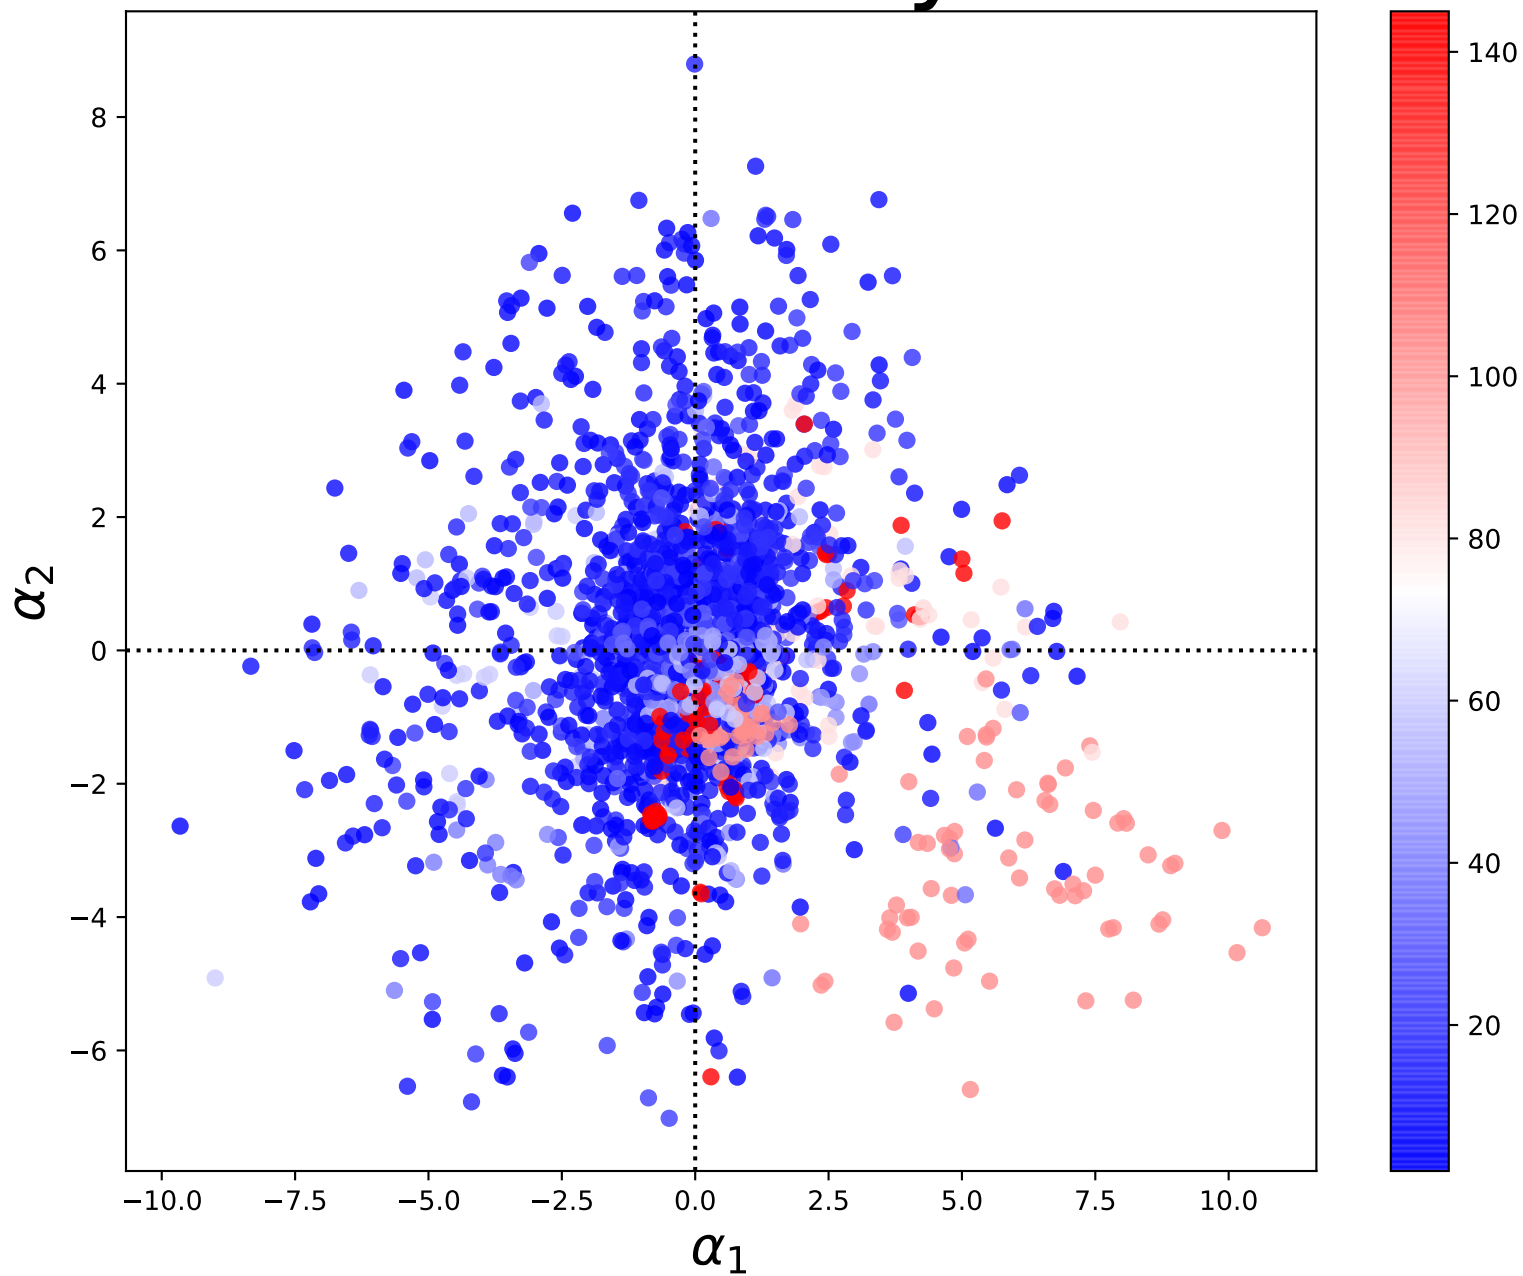

Supplement: OptionalSupplementaryData [file wf_aniso_retroelectra_5.pdf › plots/appendix_plots/wf_aniso_retroelectra_5.pdf]

# ELECTRA Layer 6

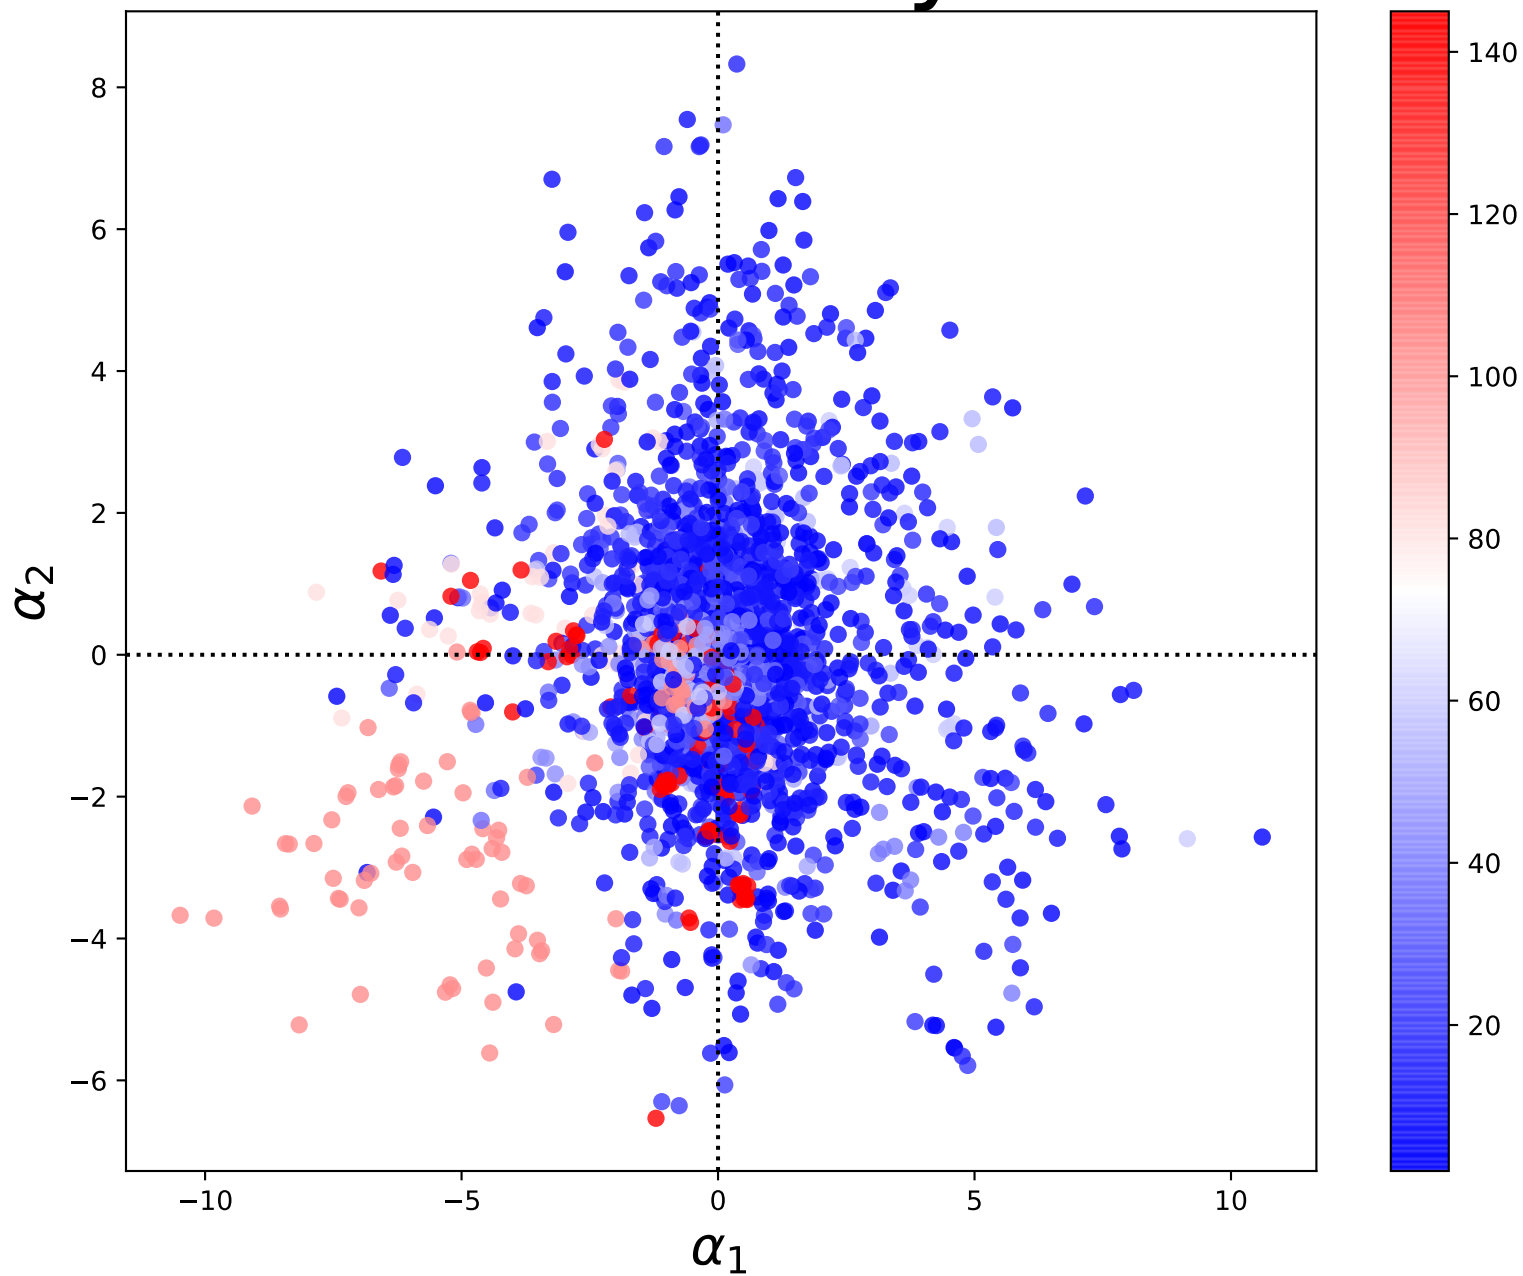

Supplement: OptionalSupplementaryData [file wf_aniso_retroelectra_6.pdf › plots/appendix_plots/wf_aniso_retroelectra_6.pdf]

# ELECTRA Layer 7

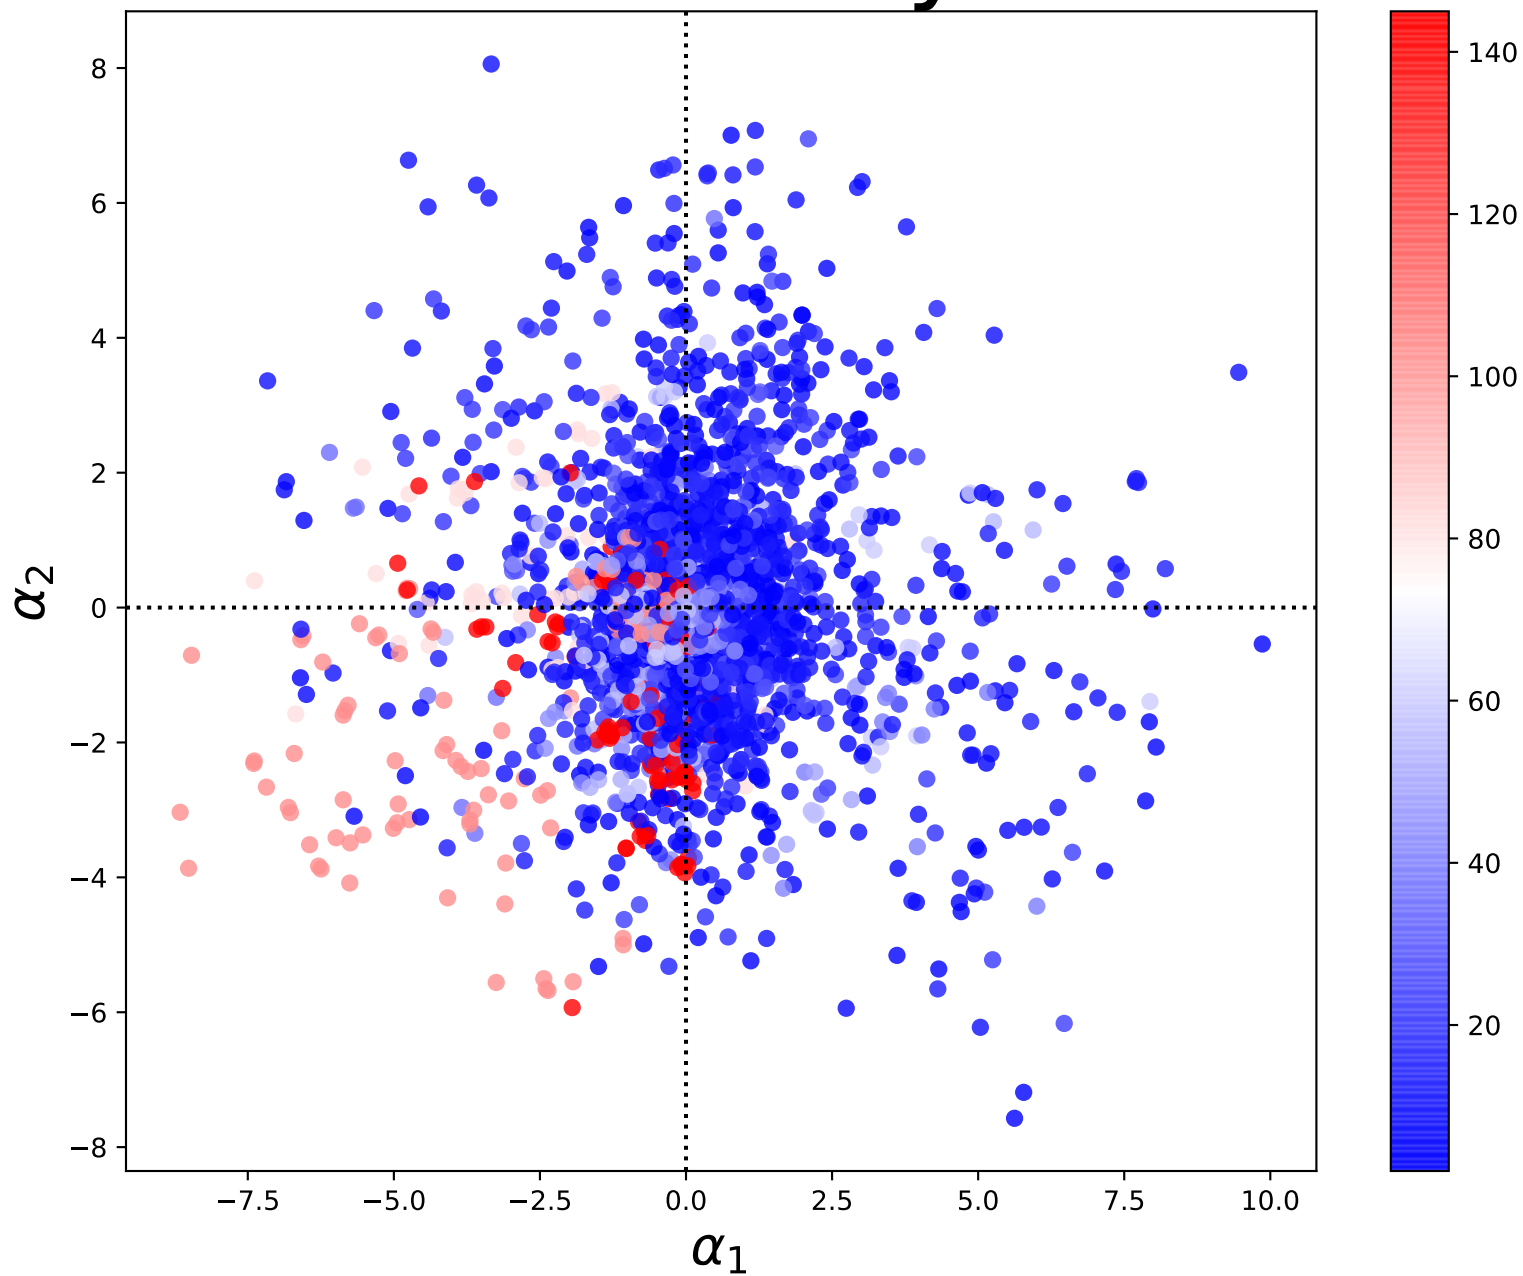

Supplement: OptionalSupplementaryData [file wf_aniso_retroelectra_7.pdf › plots/appendix_plots/wf_aniso_retroelectra_7.pdf]

# ELECTRA Layer 8

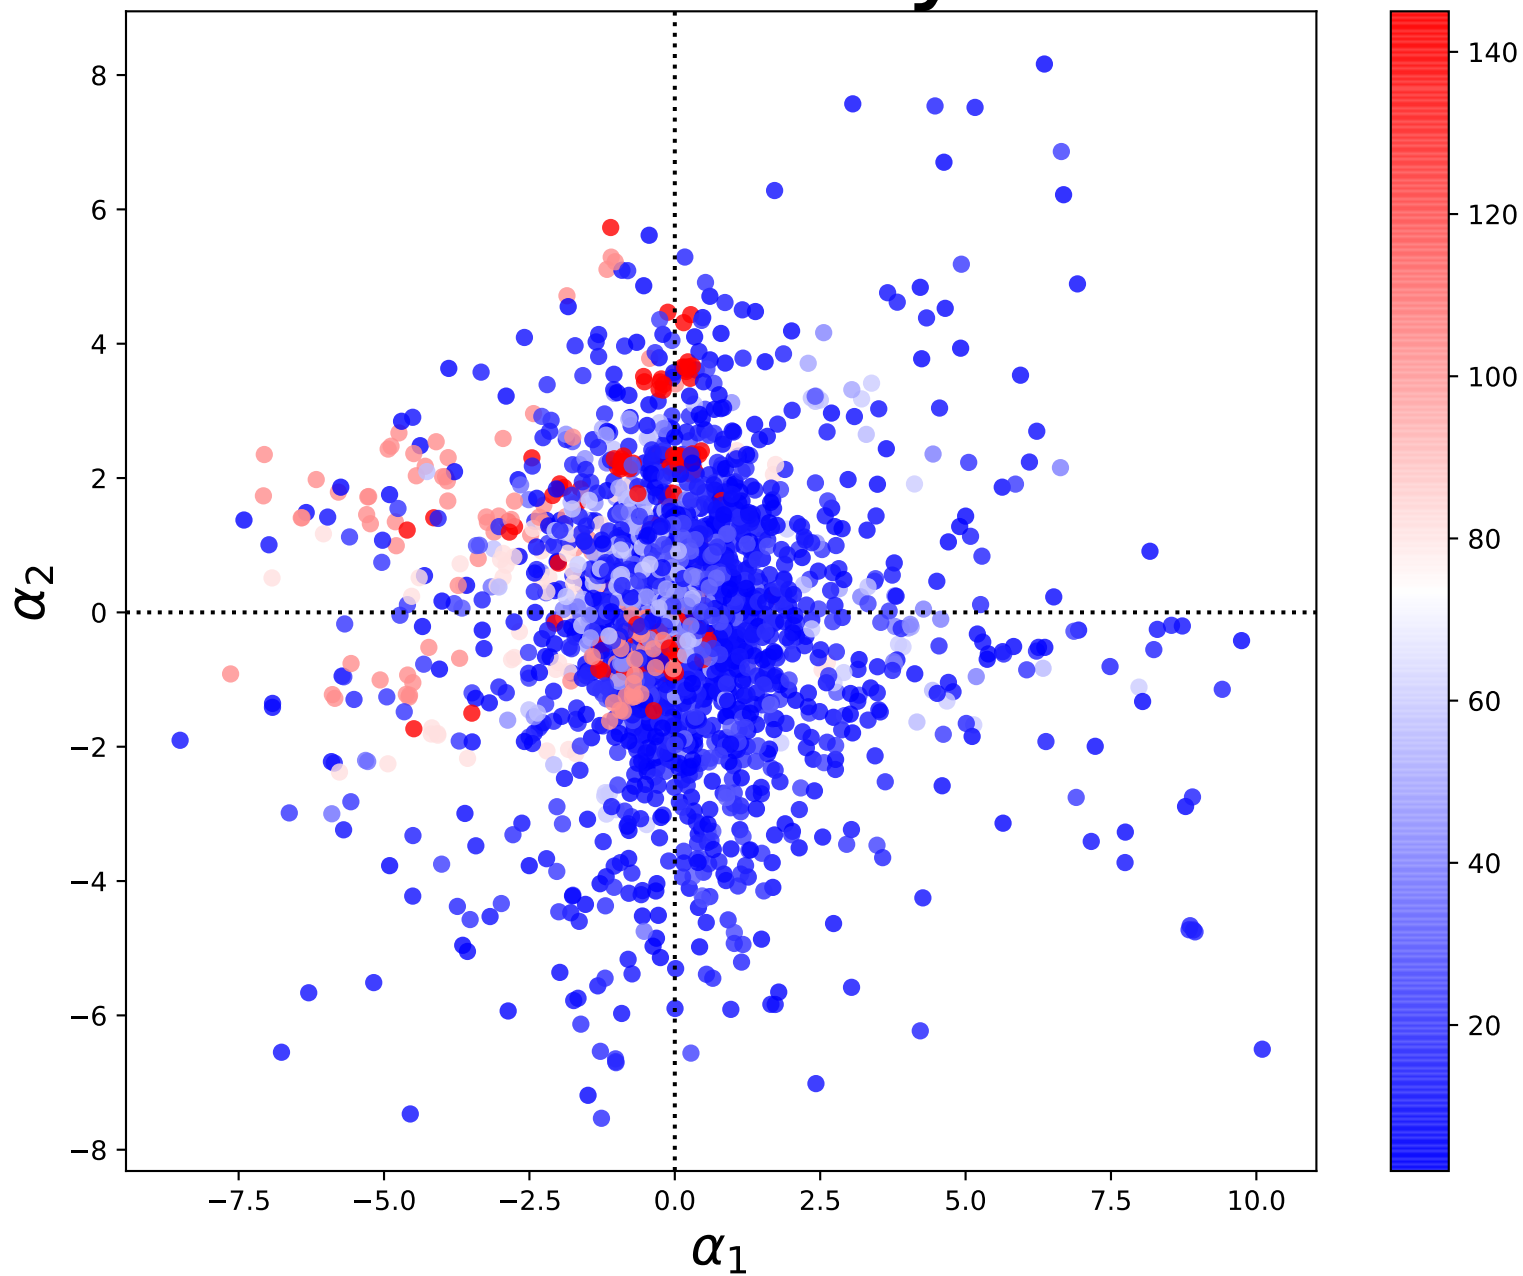

Supplement: OptionalSupplementaryData [file wf_aniso_retroelectra_8.pdf › plots/appendix_plots/wf_aniso_retroelectra_8.pdf]

# ELECTRA Layer 9

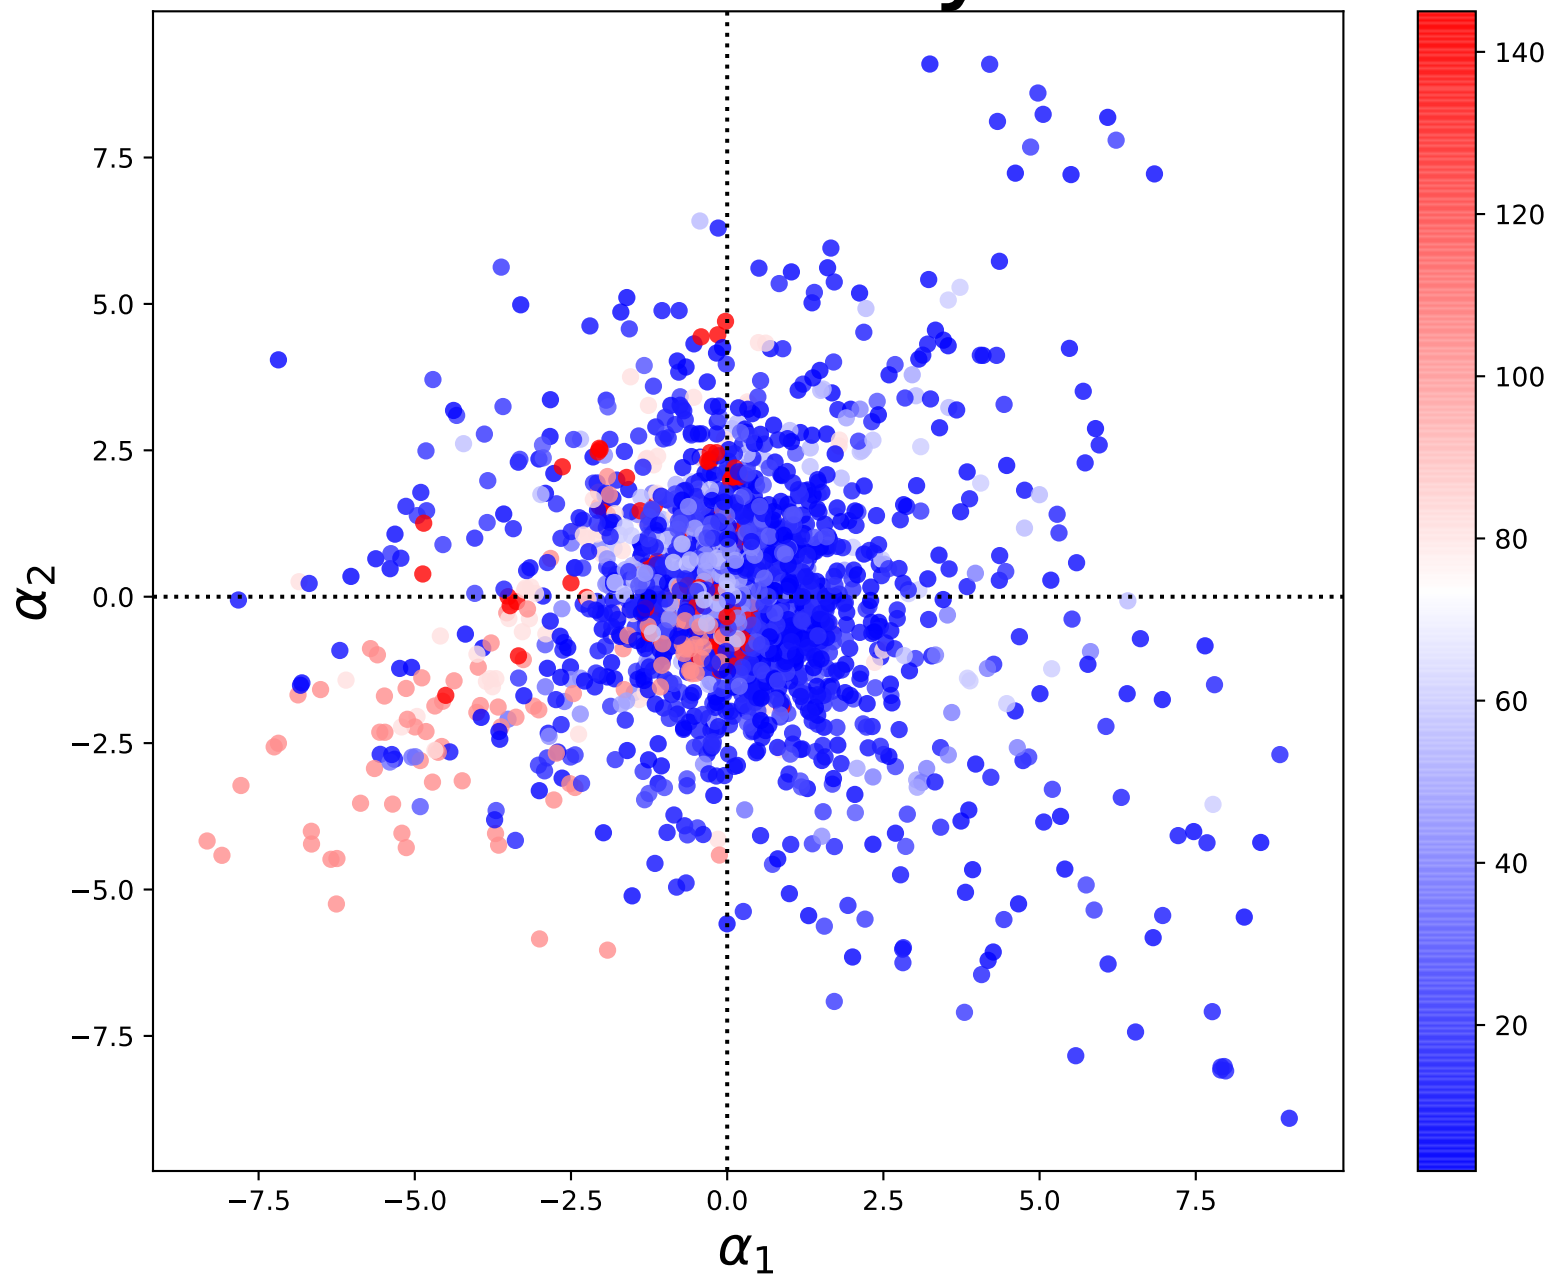

Supplement: OptionalSupplementaryData [file wf_aniso_retroelectra_9.pdf › plots/appendix_plots/wf_aniso_retroelectra_9.pdf]

# GPT2 Layer 0

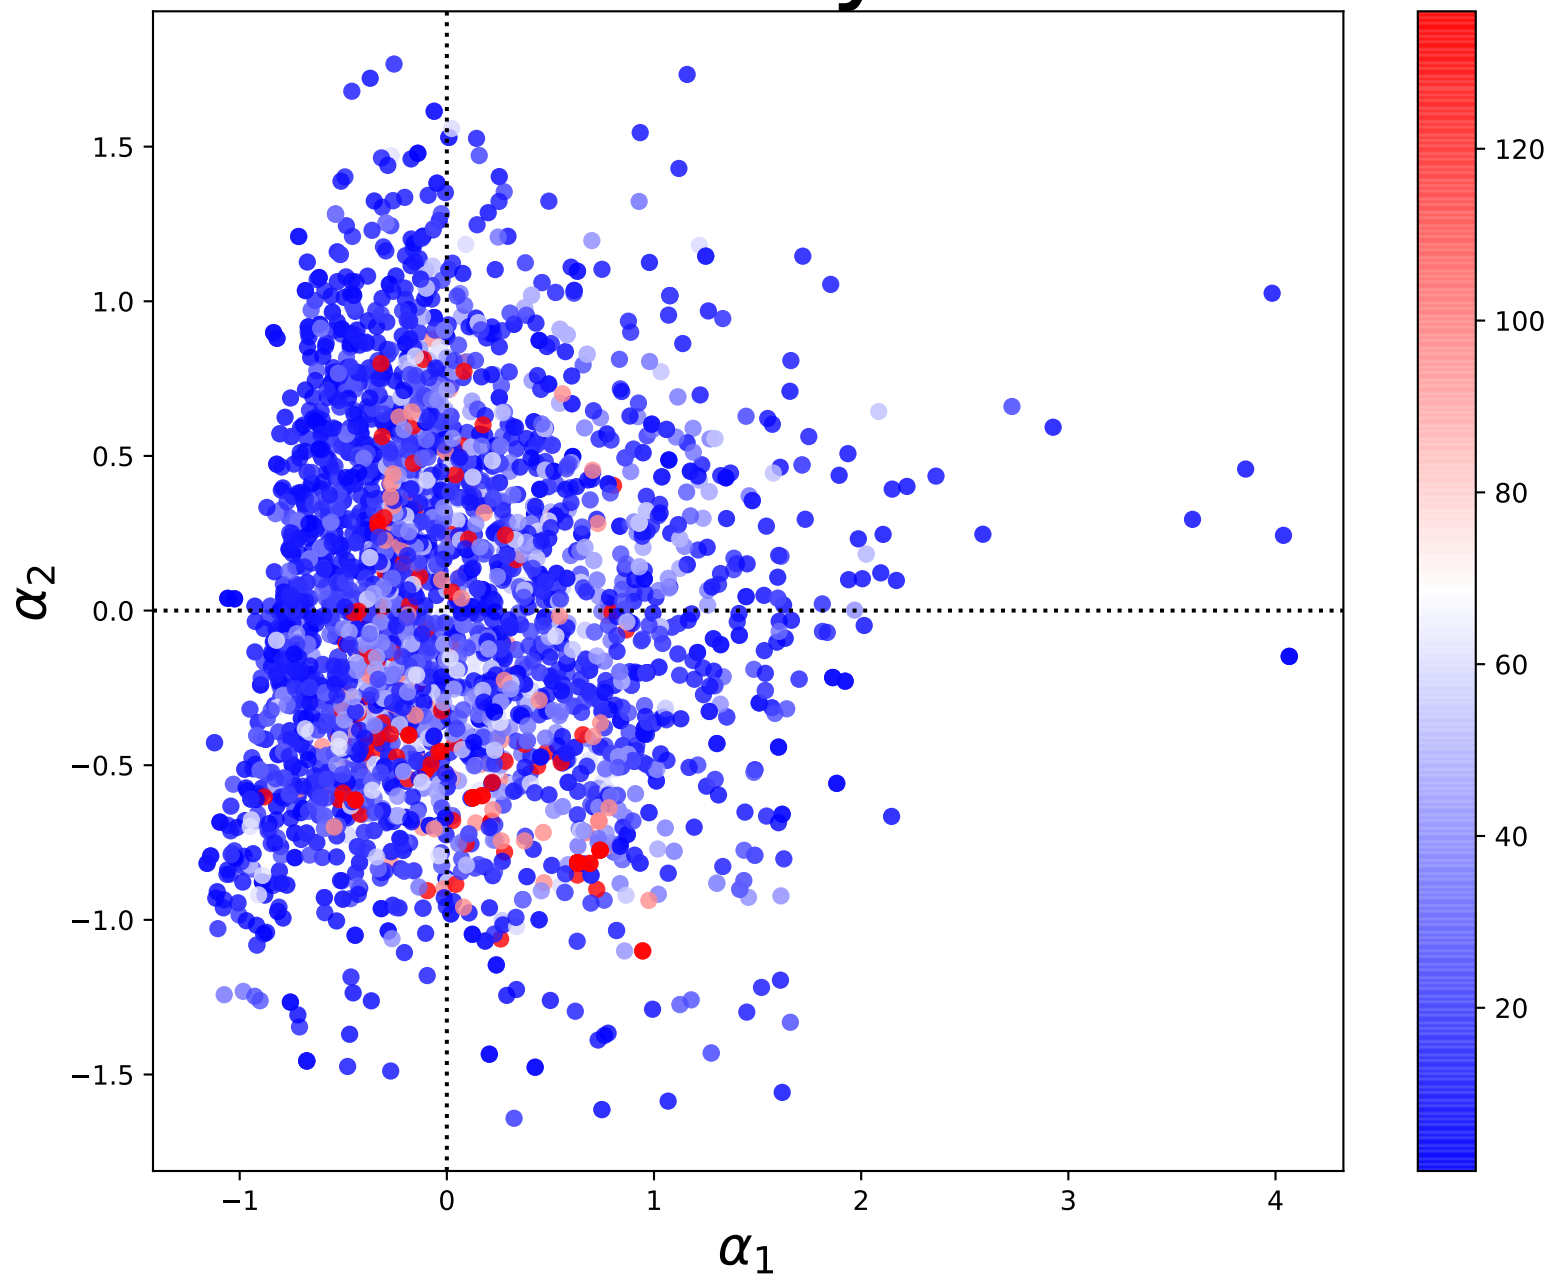

Supplement: OptionalSupplementaryData [file wf_aniso_retrogpt2_0.pdf › plots/appendix_plots/wf_aniso_retrogpt2_0.pdf]

# GPT2 Layer 1

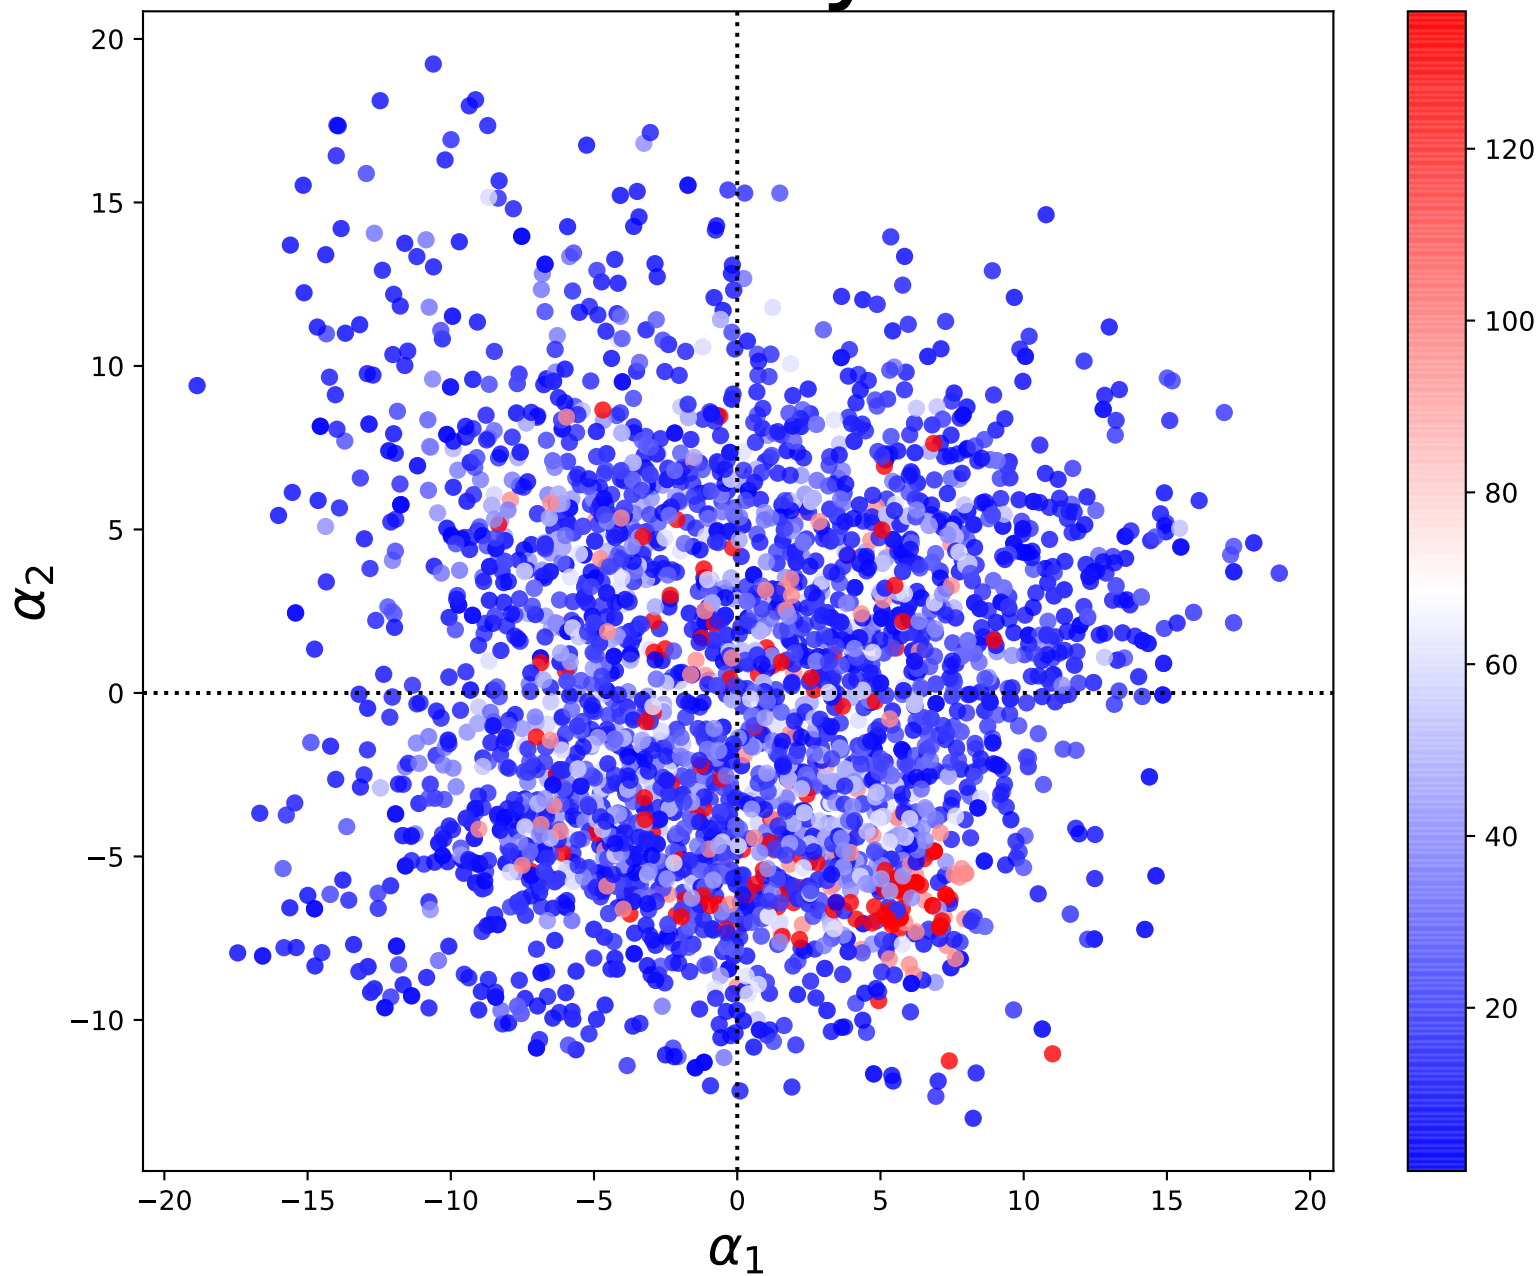

Supplement: OptionalSupplementaryData [file wf_aniso_retrogpt2_1.pdf › plots/appendix_plots/wf_aniso_retrogpt2_1.pdf]

# GPT2 Layer 10

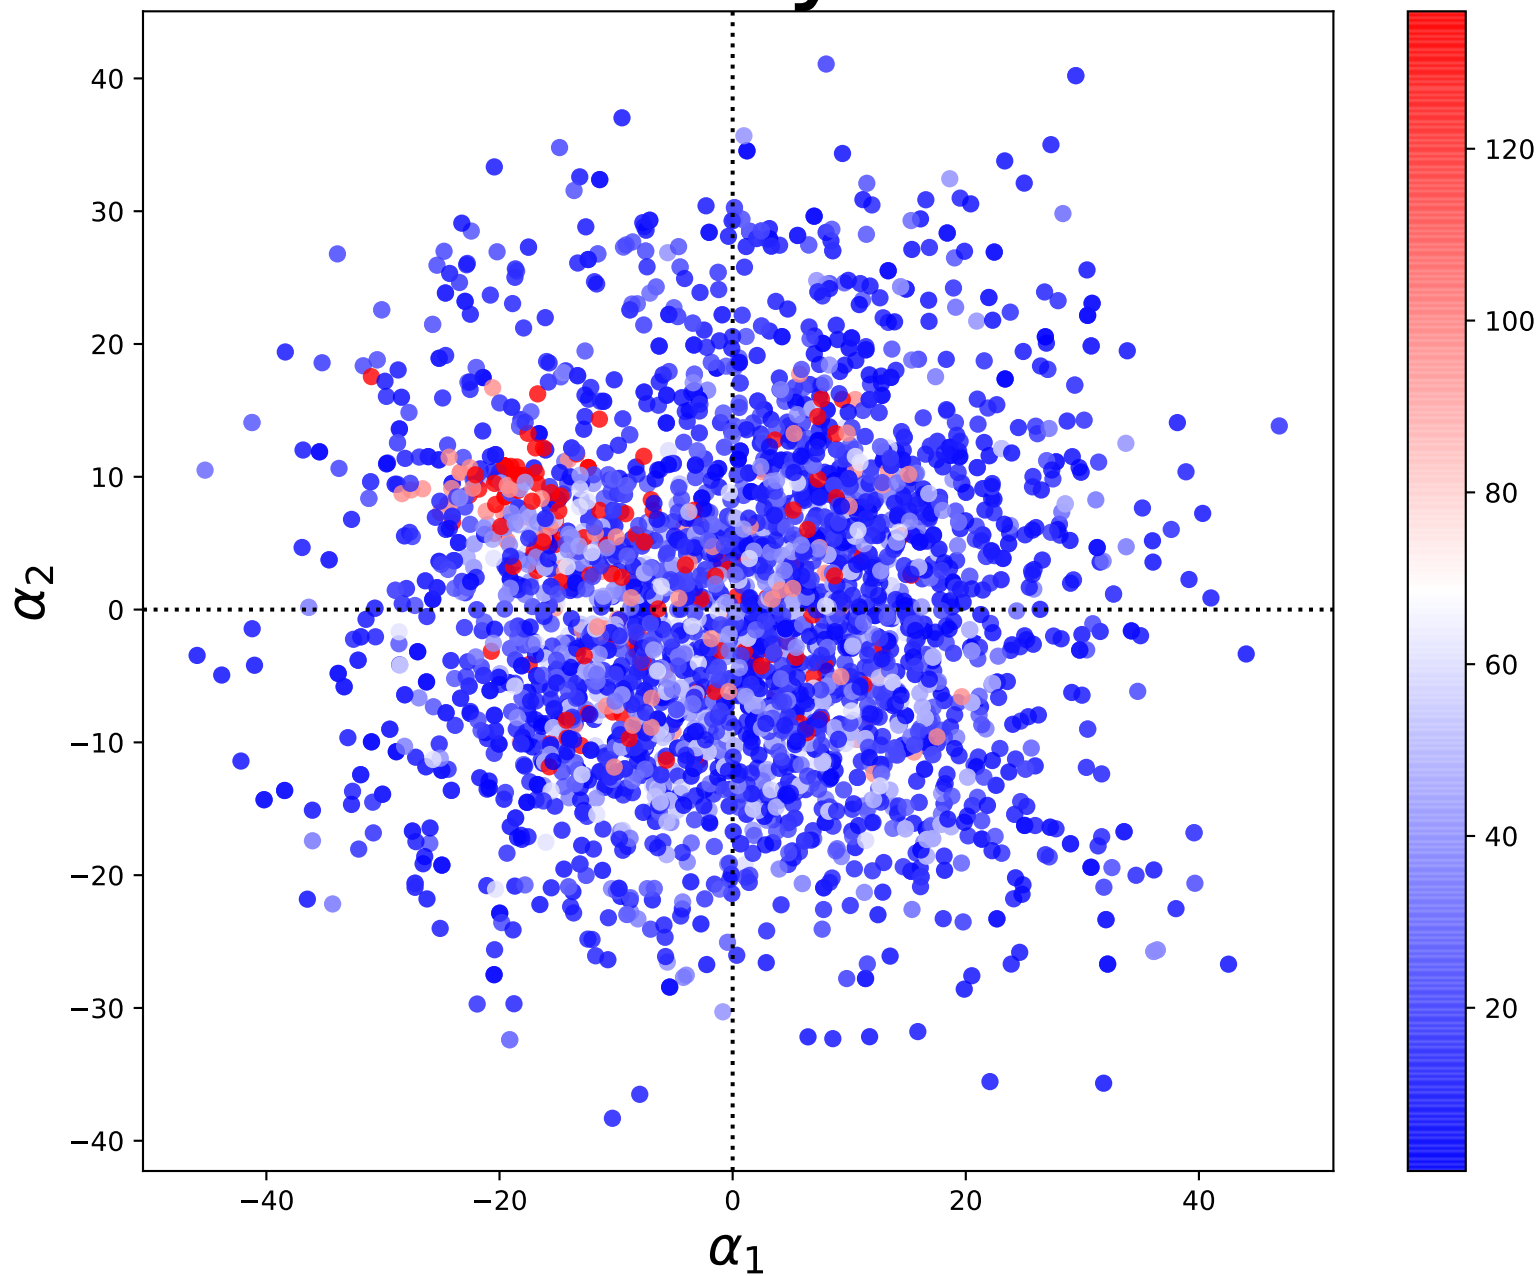

Supplement: OptionalSupplementaryData [file wf_aniso_retrogpt2_10.pdf › plots/appendix_plots/wf_aniso_retrogpt2_10.pdf]

# GPT2 Layer 11

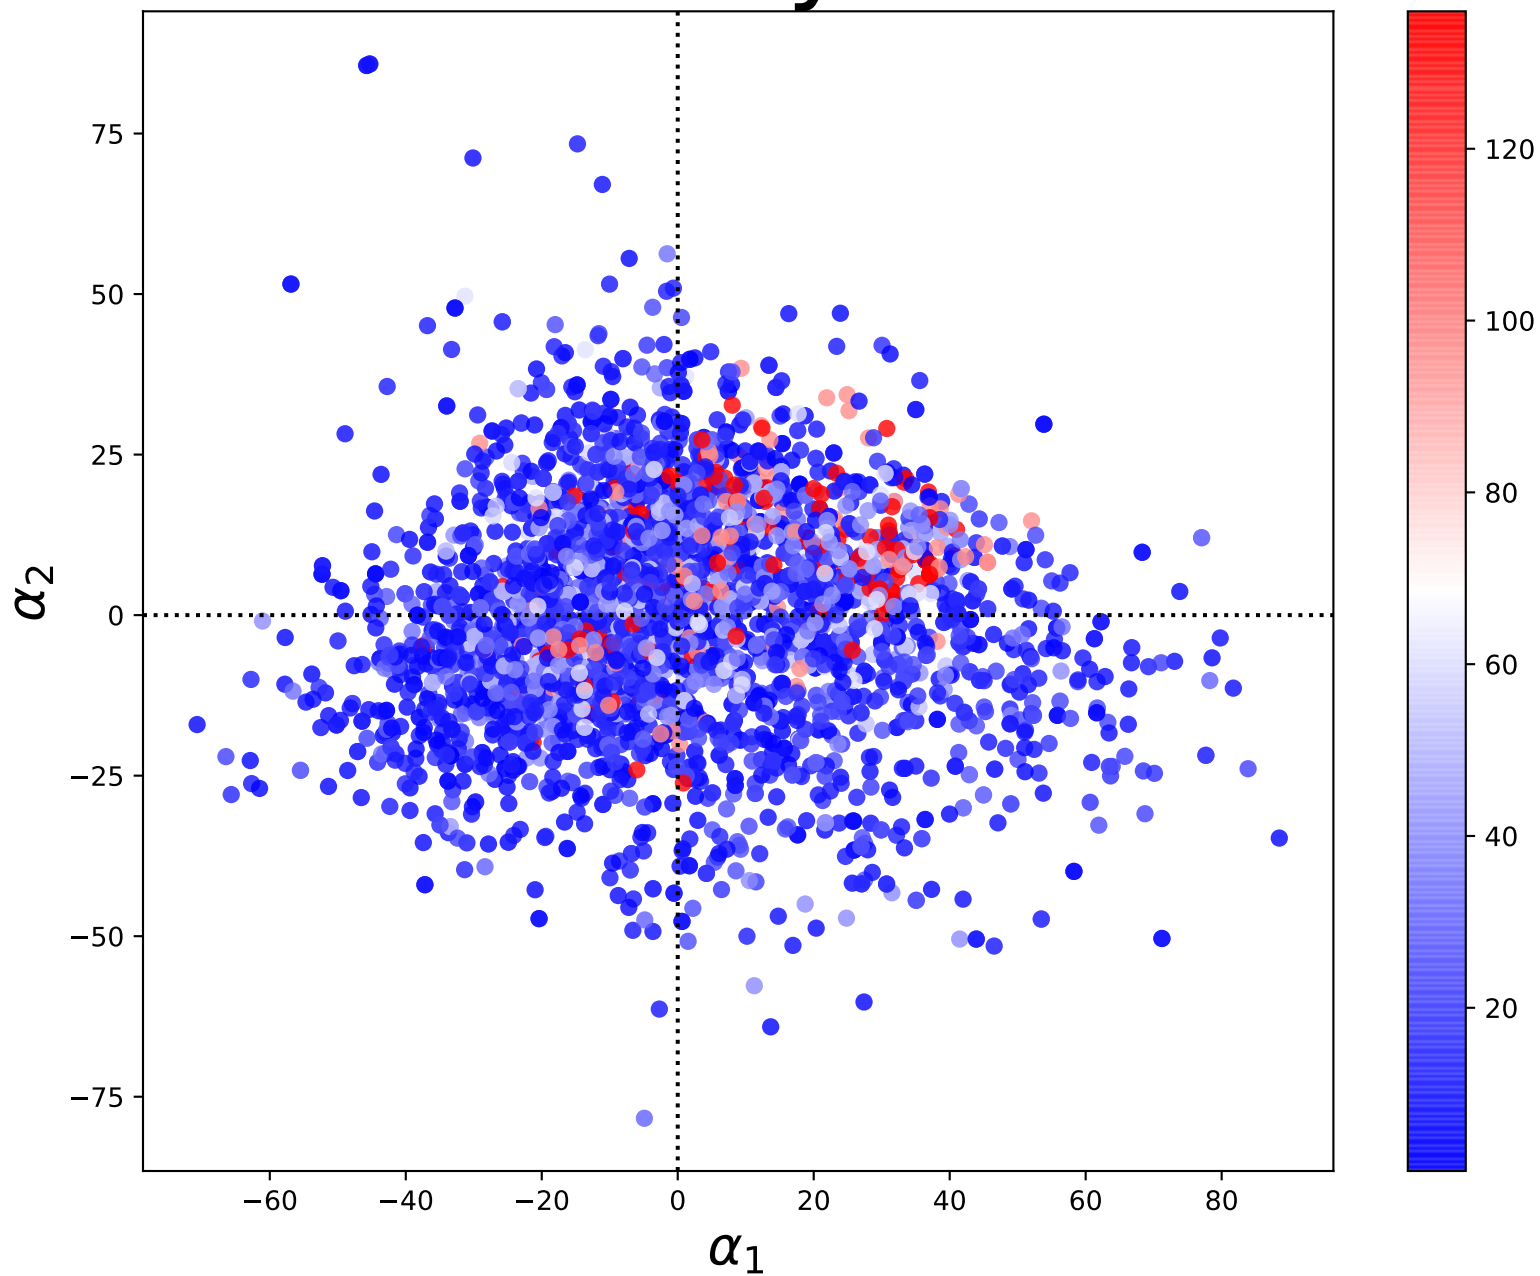

Supplement: OptionalSupplementaryData [file wf_aniso_retrogpt2_11.pdf › plots/appendix_plots/wf_aniso_retrogpt2_11.pdf]

# GPT2 Layer 12

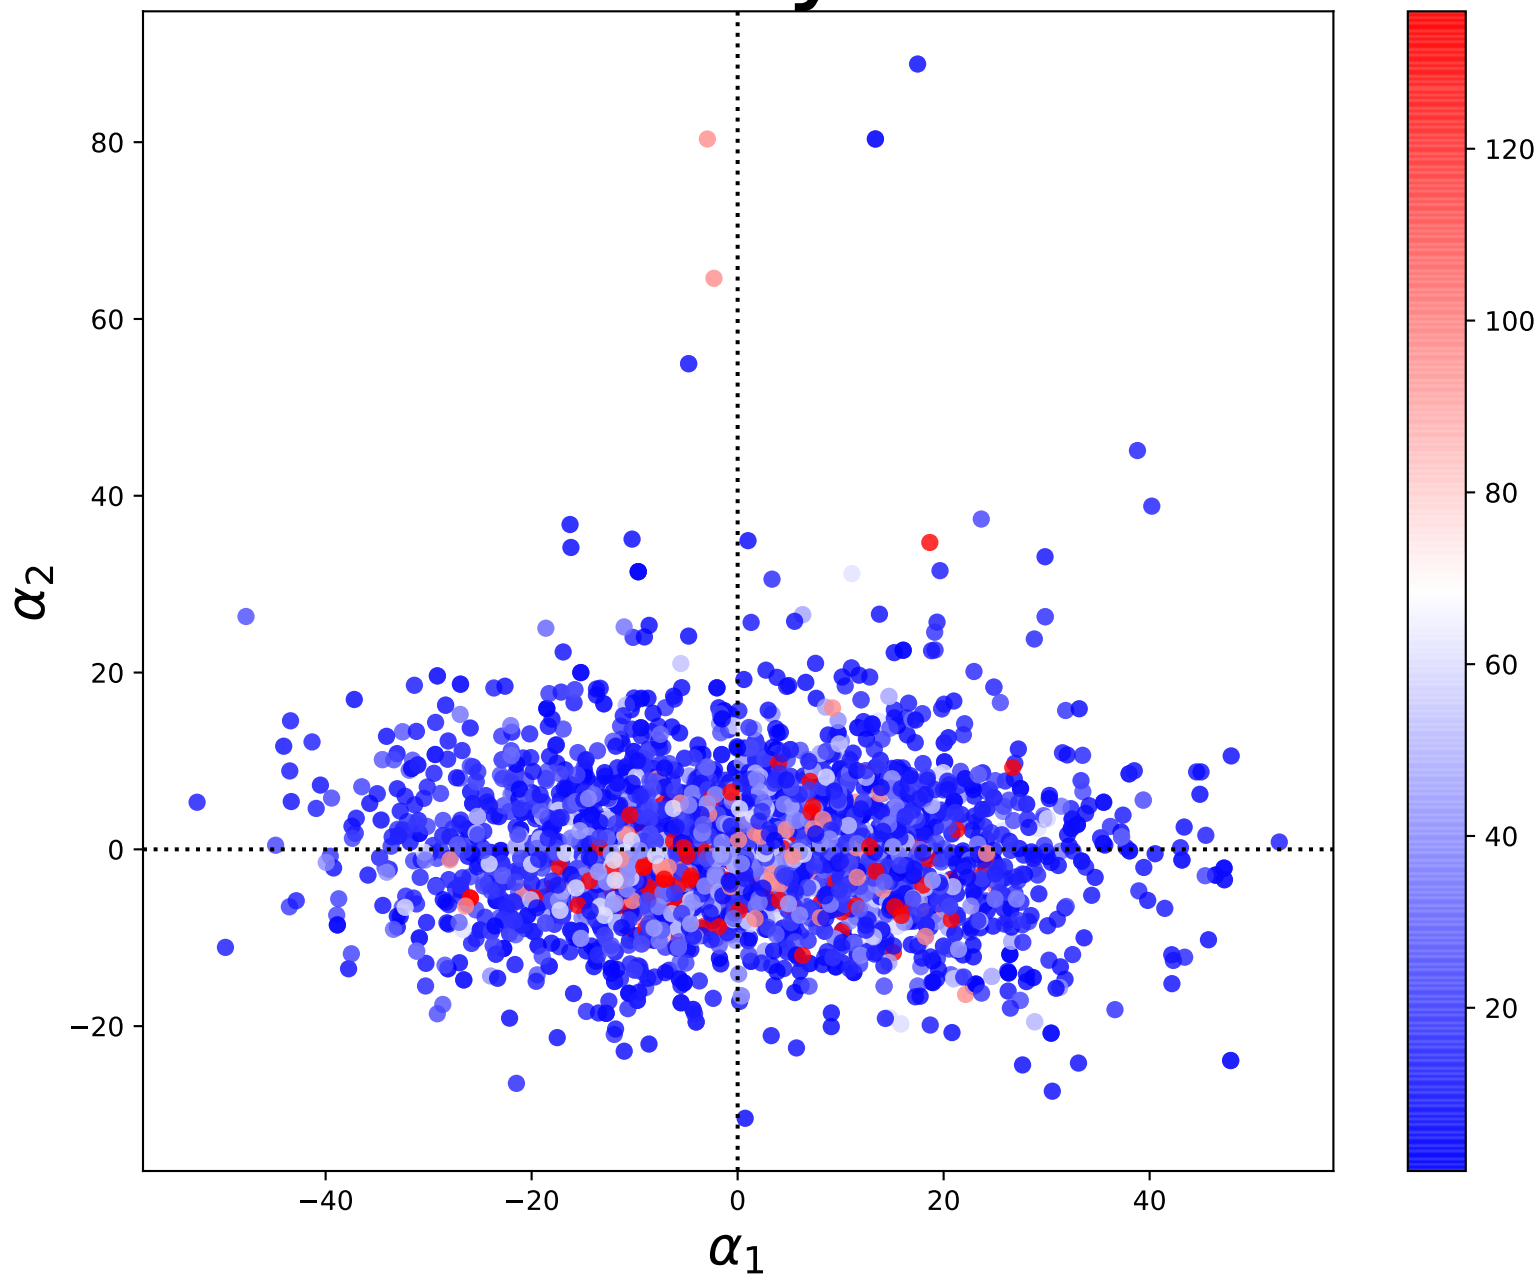

Supplement: OptionalSupplementaryData [file wf_aniso_retrogpt2_12.pdf › plots/appendix_plots/wf_aniso_retrogpt2_12.pdf]

# GPT2 Layer 2

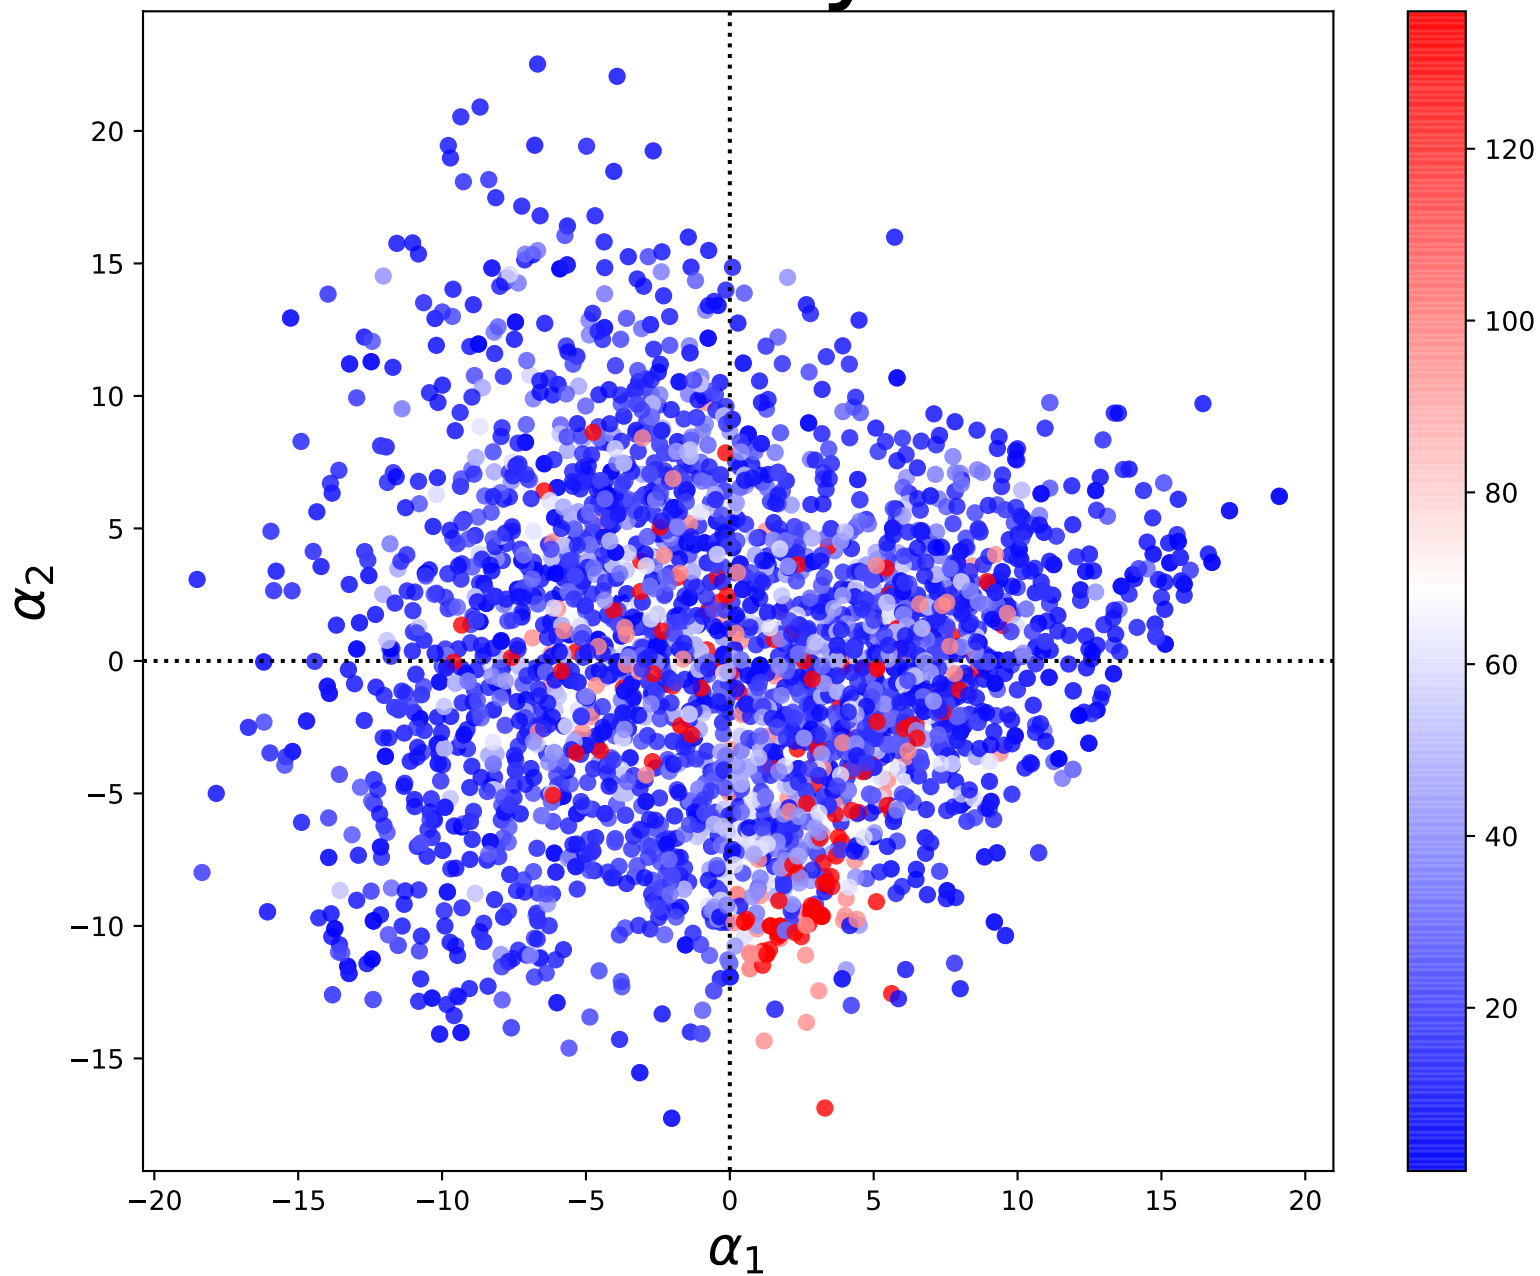

Supplement: OptionalSupplementaryData [file wf_aniso_retrogpt2_2.pdf › plots/appendix_plots/wf_aniso_retrogpt2_2.pdf]

# GPT2 Layer 3

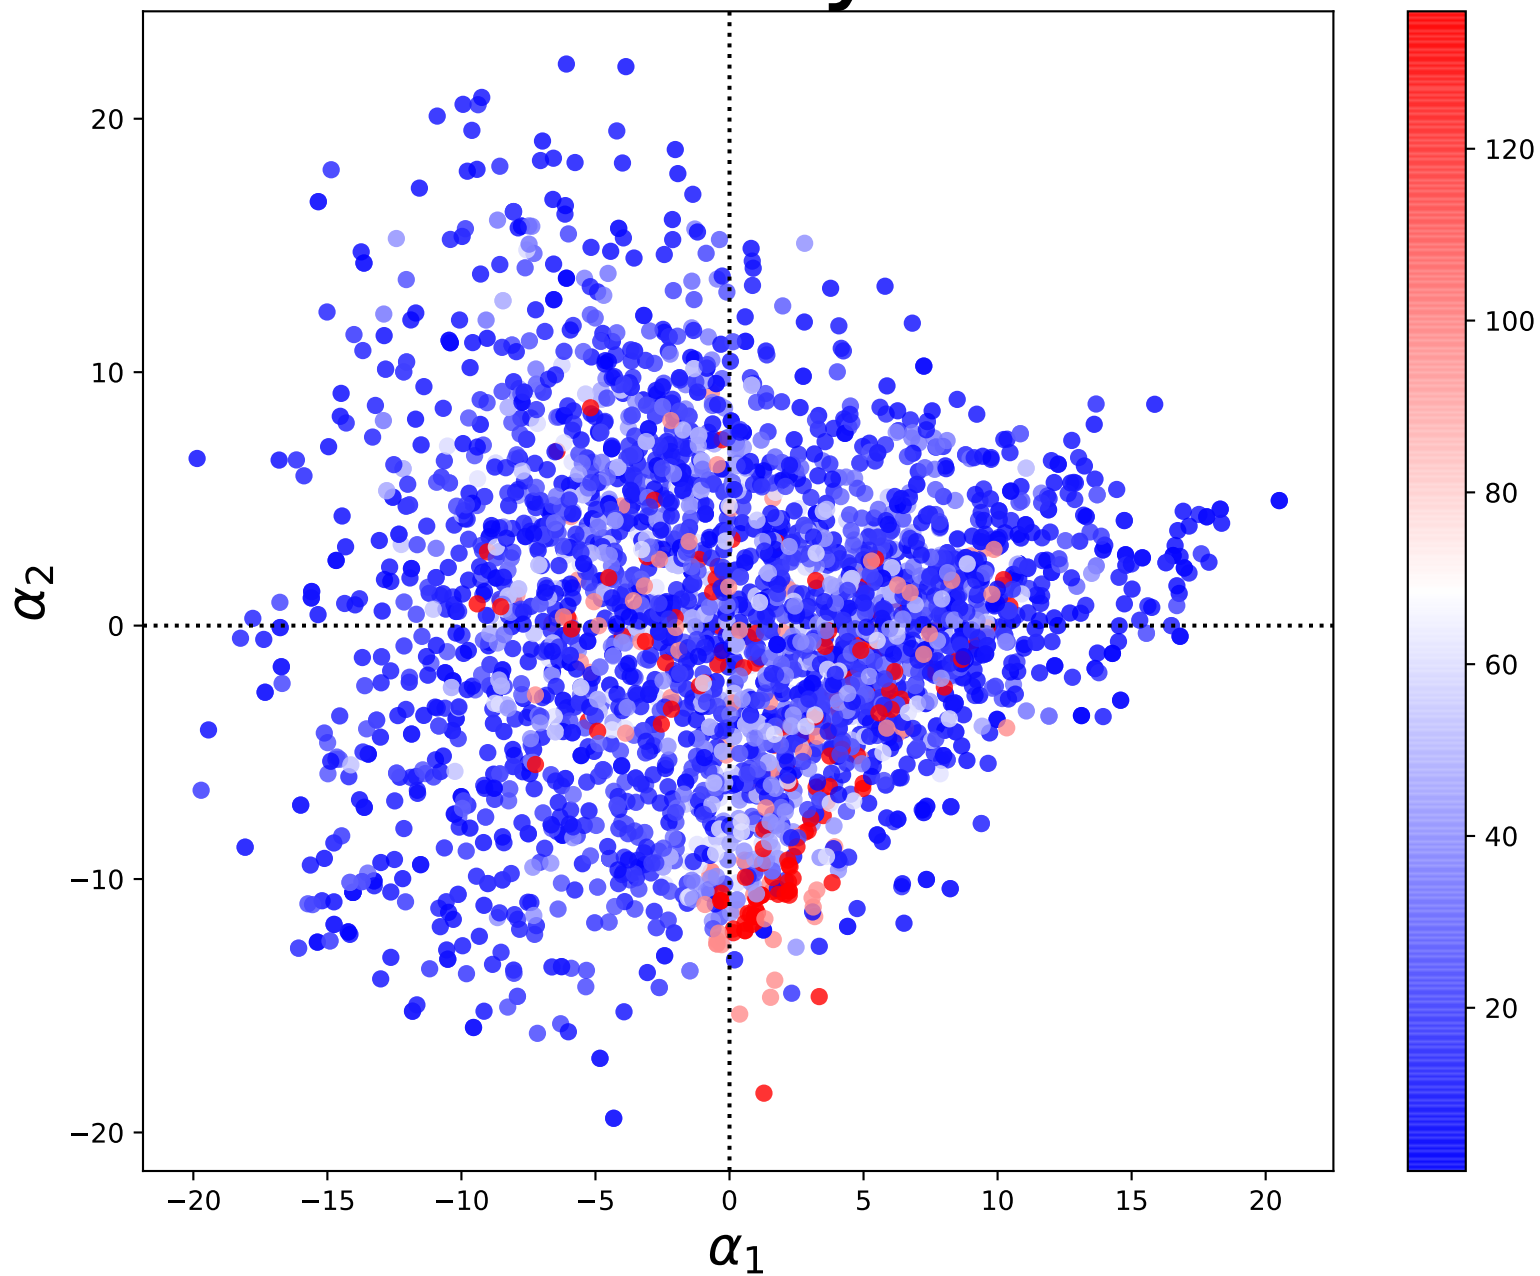

Supplement: OptionalSupplementaryData [file wf_aniso_retrogpt2_3.pdf › plots/appendix_plots/wf_aniso_retrogpt2_3.pdf]

# GPT2 Layer 4

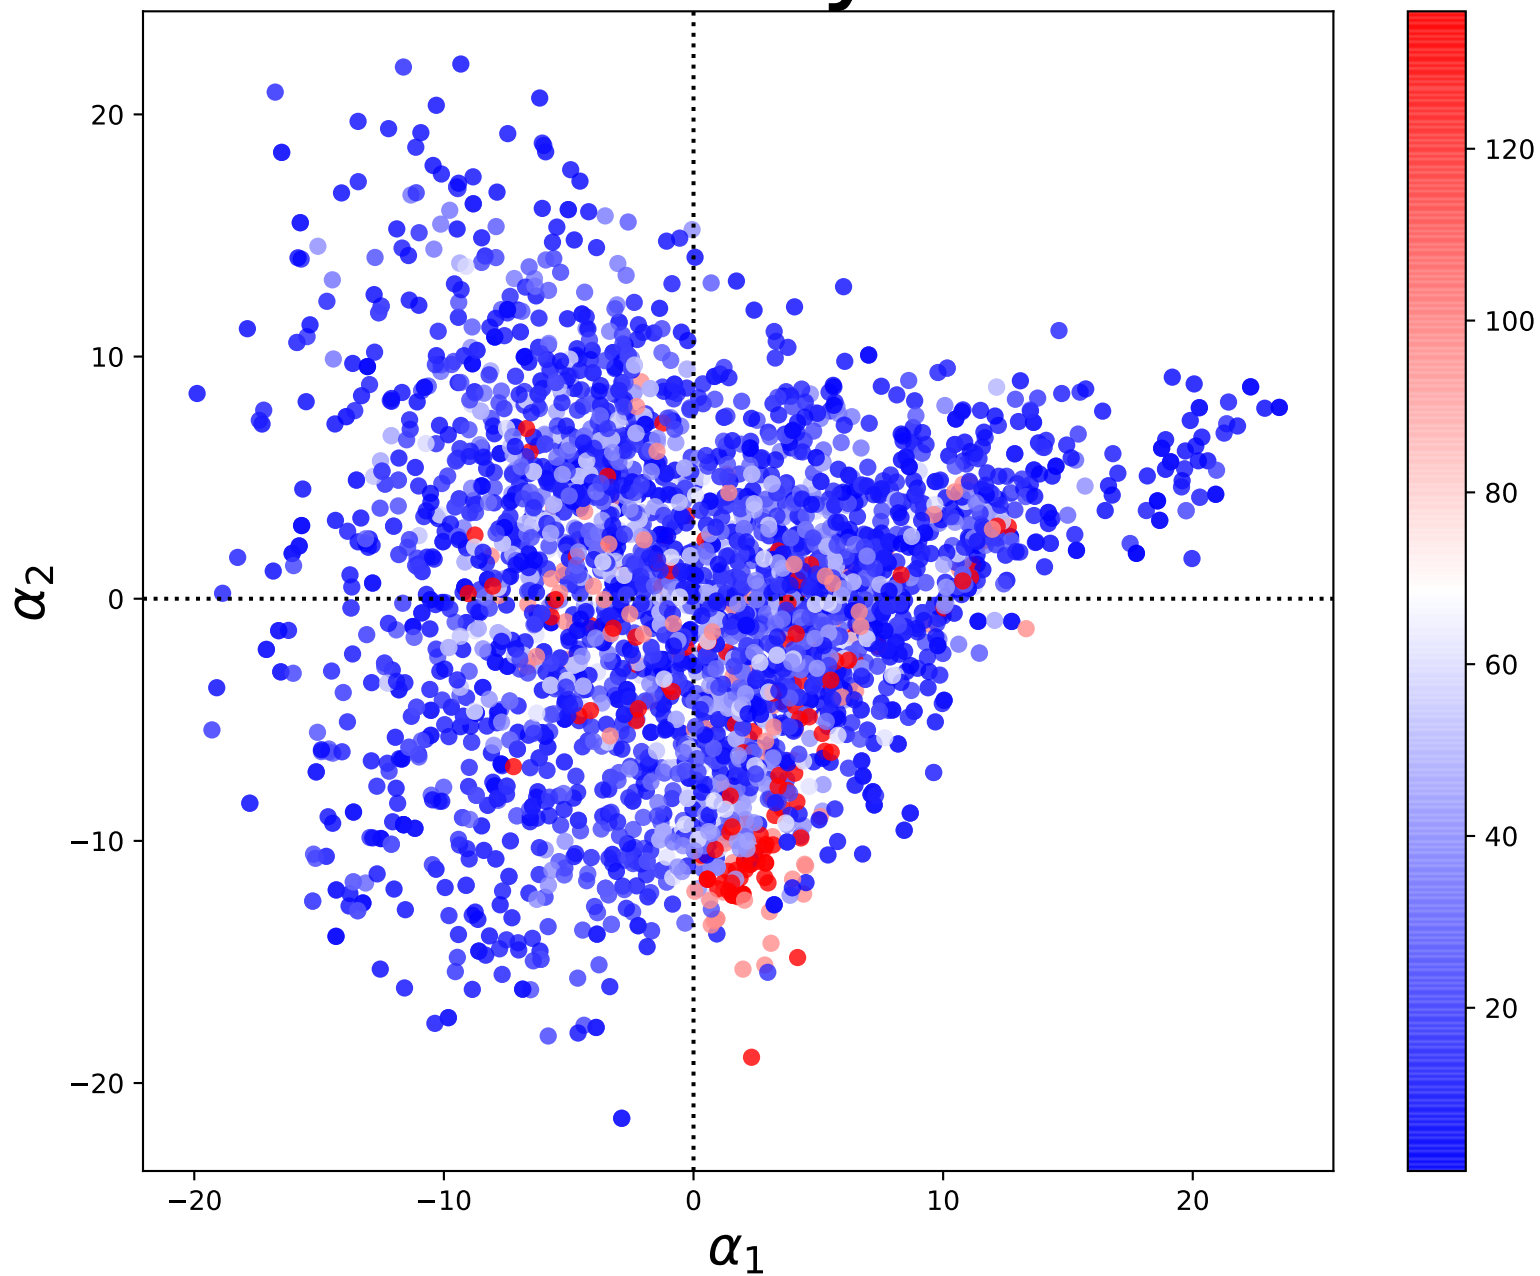

Supplement: OptionalSupplementaryData [file wf_aniso_retrogpt2_4.pdf › plots/appendix_plots/wf_aniso_retrogpt2_4.pdf]

# GPT2 Layer 5

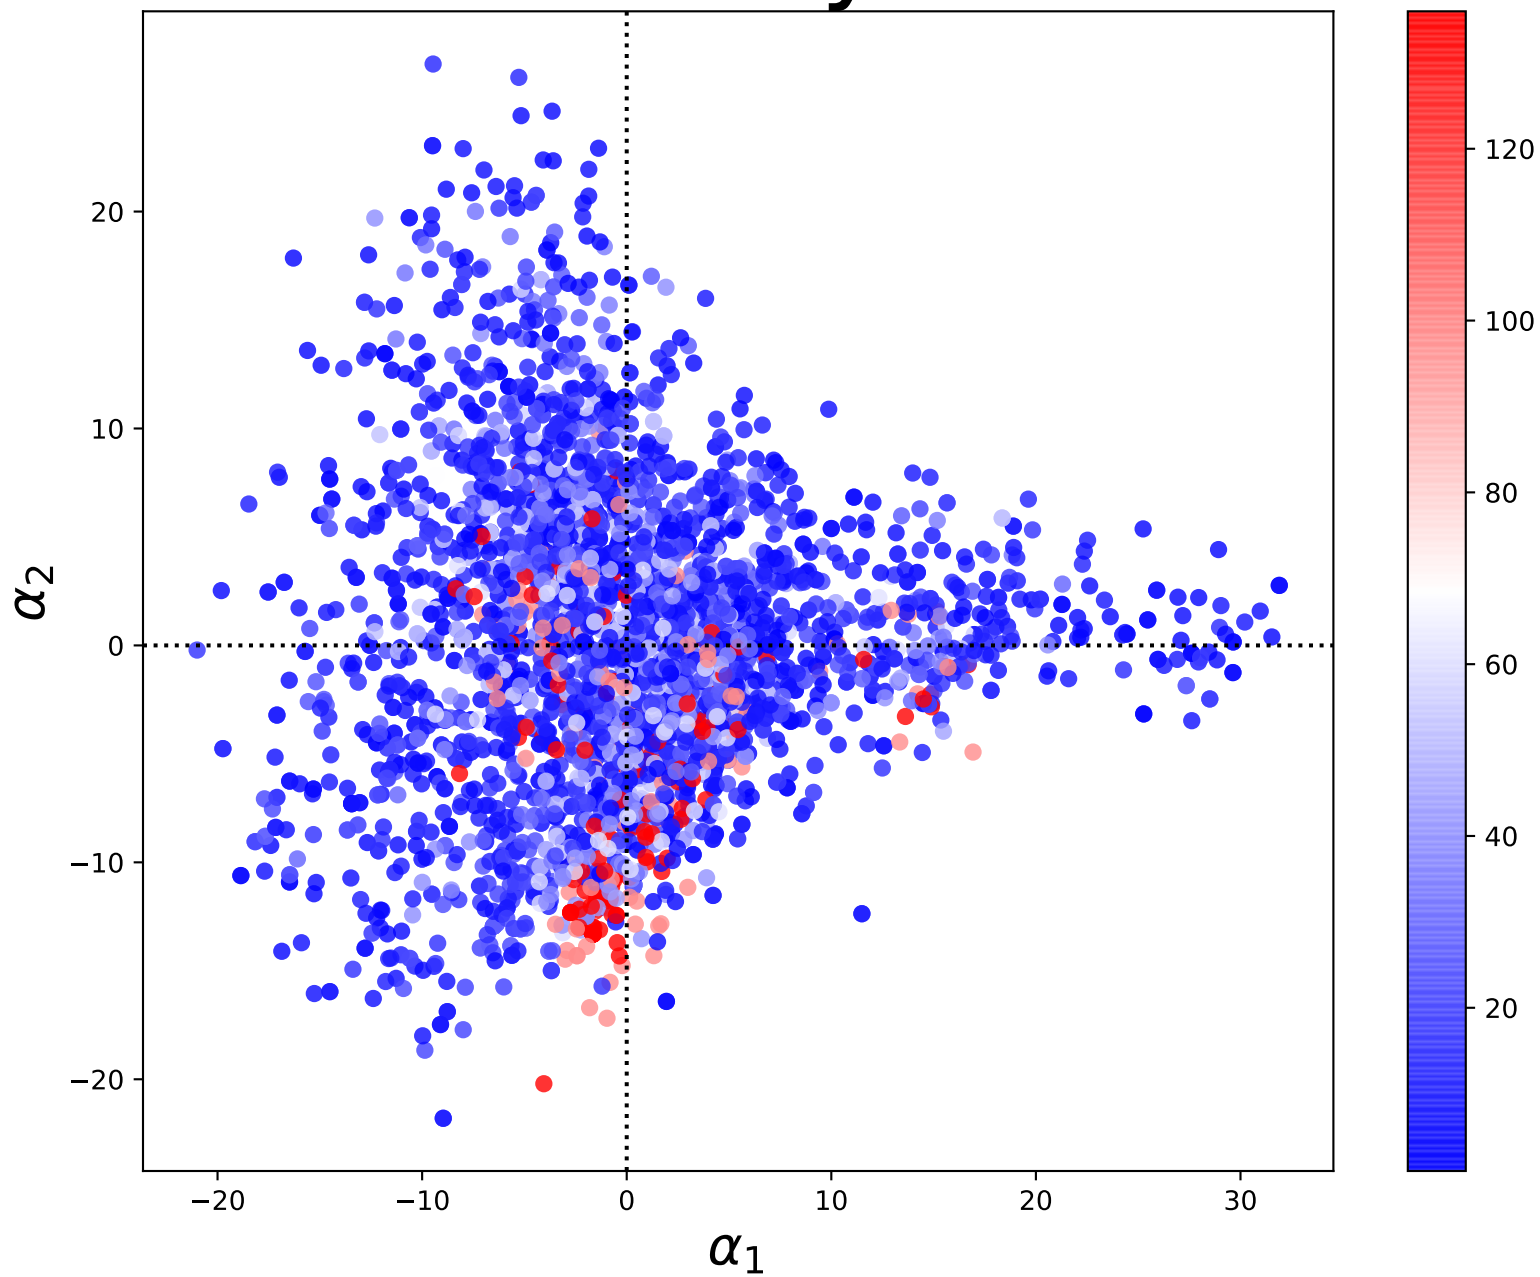

Supplement: OptionalSupplementaryData [file wf_aniso_retrogpt2_5.pdf › plots/appendix_plots/wf_aniso_retrogpt2_5.pdf]

# GPT2 Layer 6

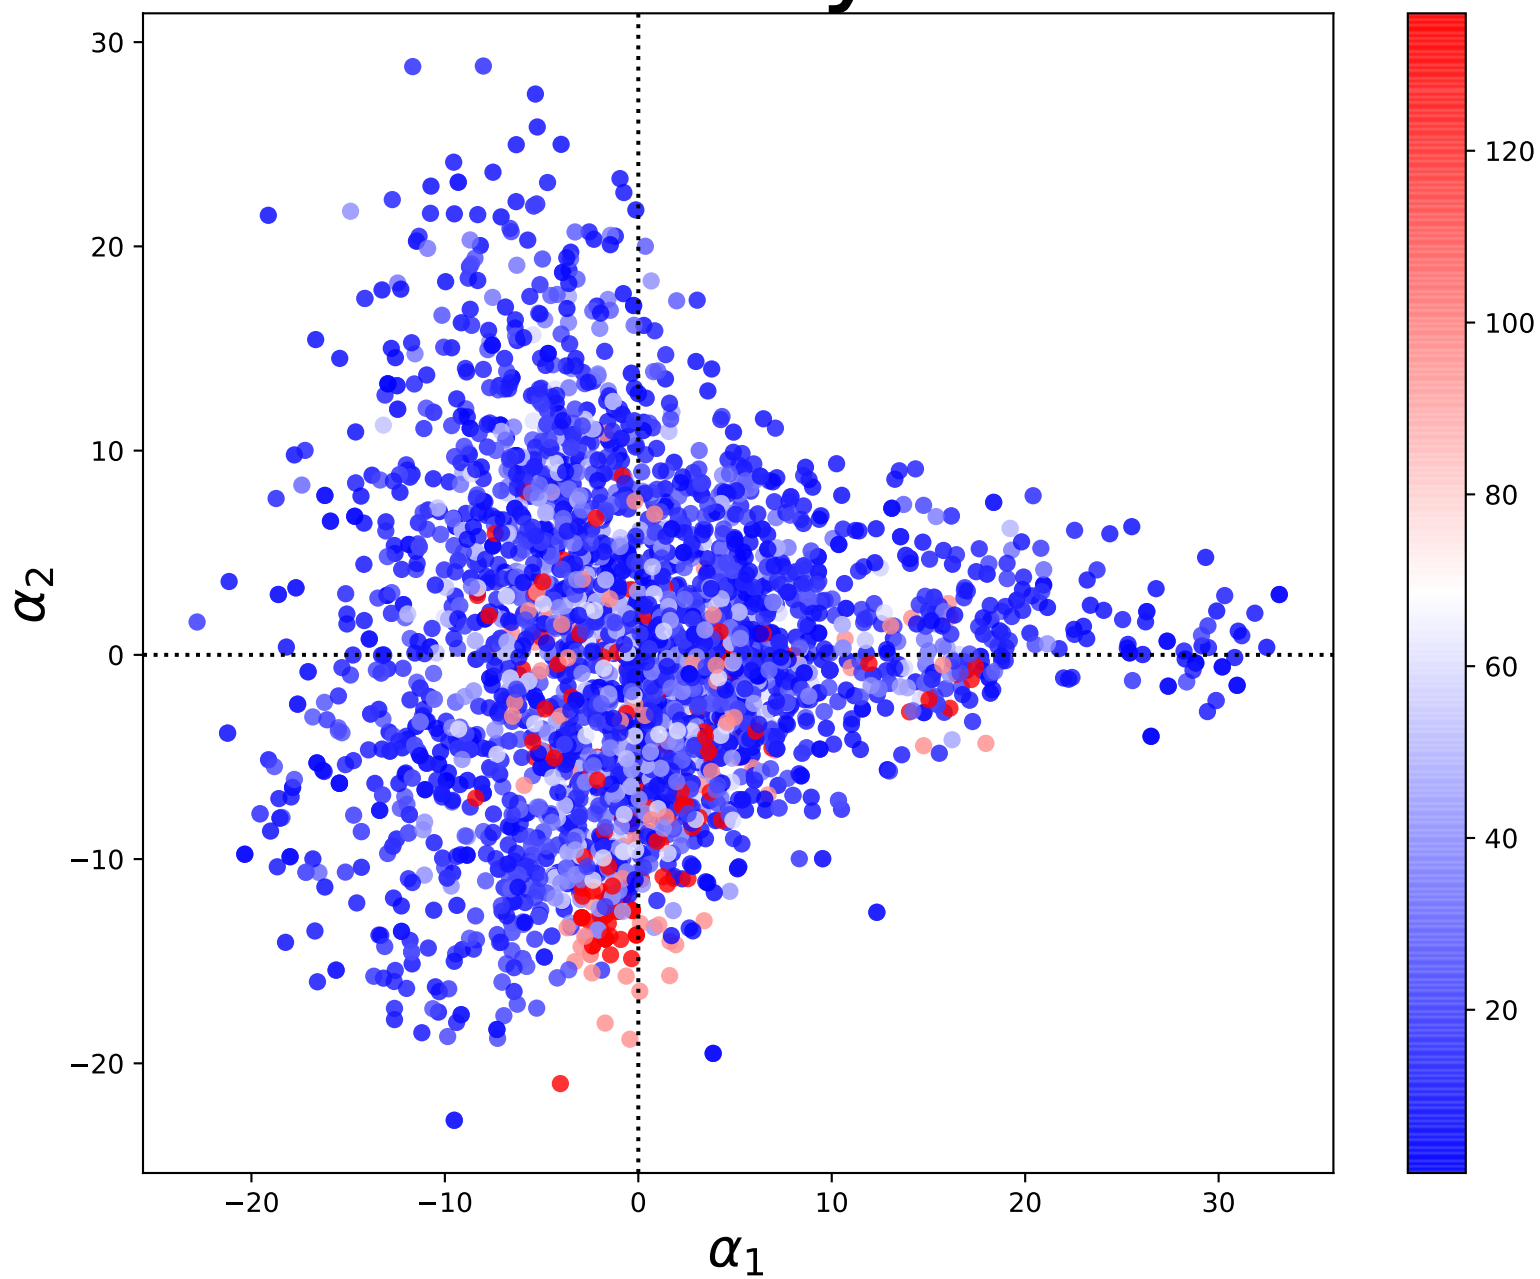

Supplement: OptionalSupplementaryData [file wf_aniso_retrogpt2_6.pdf › plots/appendix_plots/wf_aniso_retrogpt2_6.pdf]

# GPT2 Layer 7

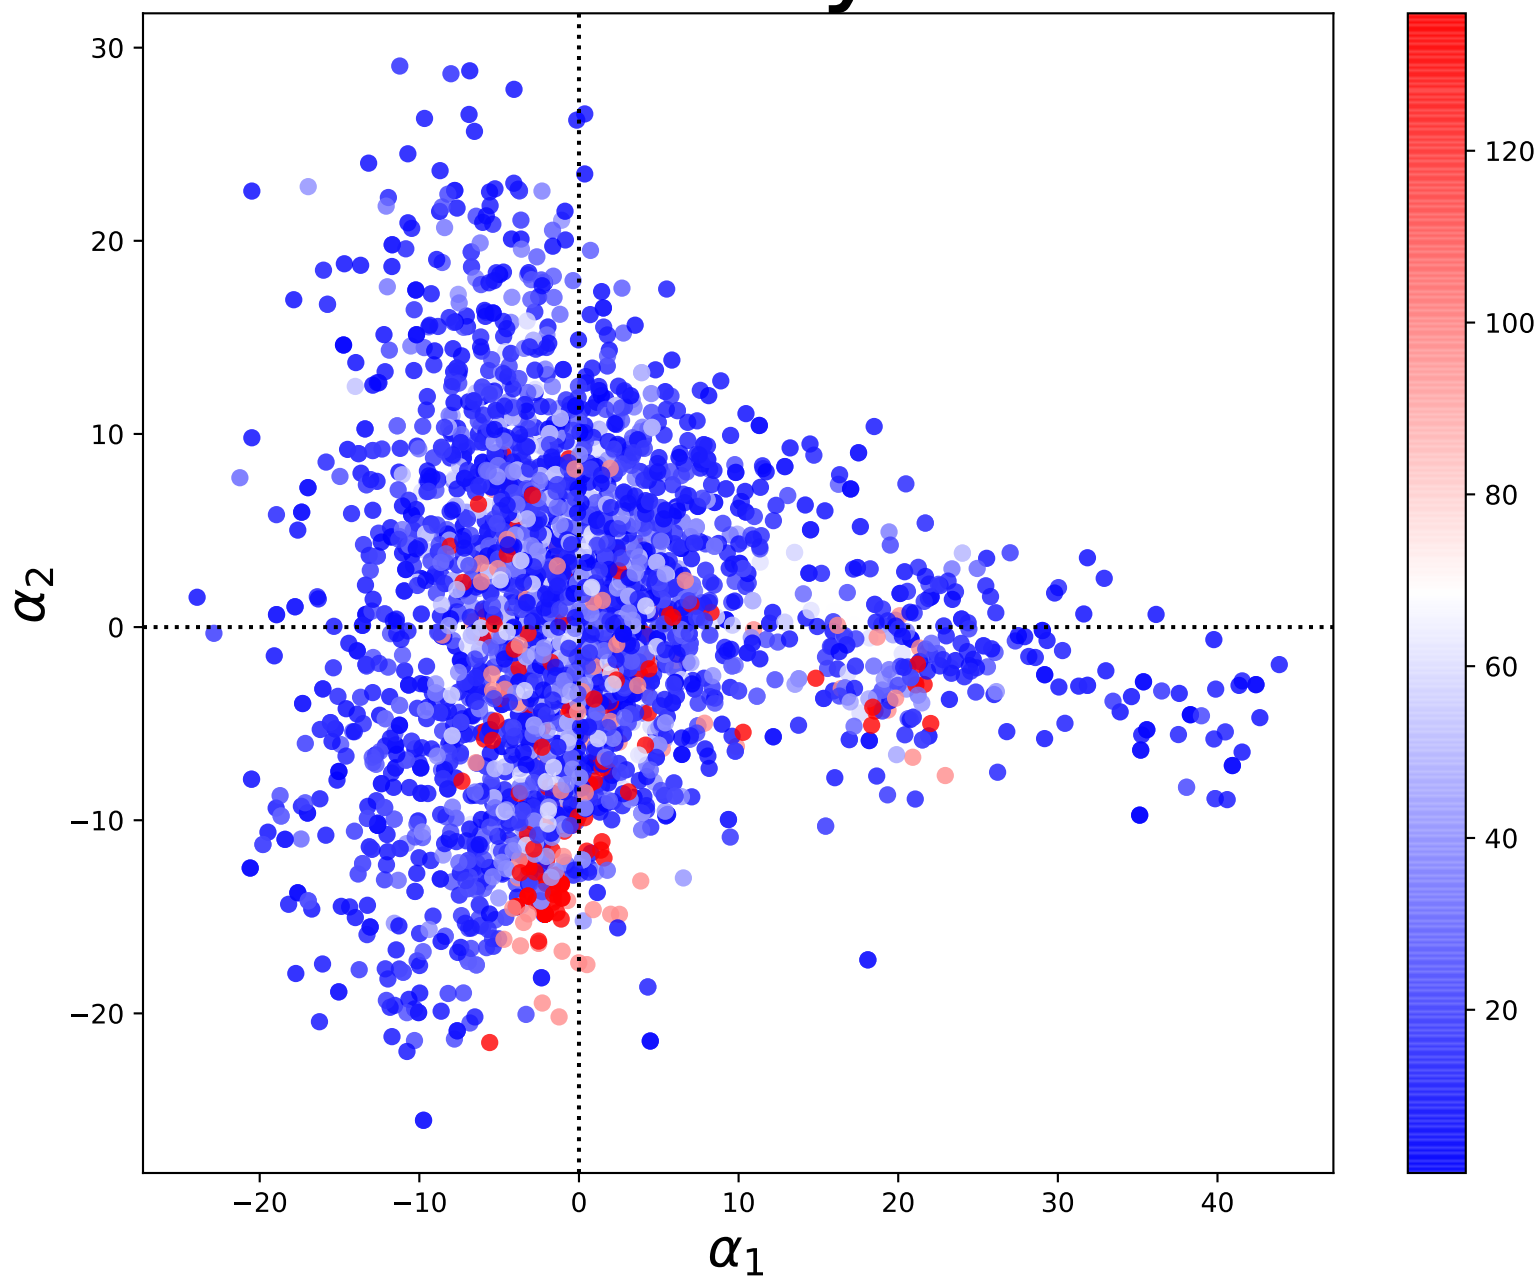

Supplement: OptionalSupplementaryData [file wf_aniso_retrogpt2_7.pdf › plots/appendix_plots/wf_aniso_retrogpt2_7.pdf]

# GPT2 Layer 8

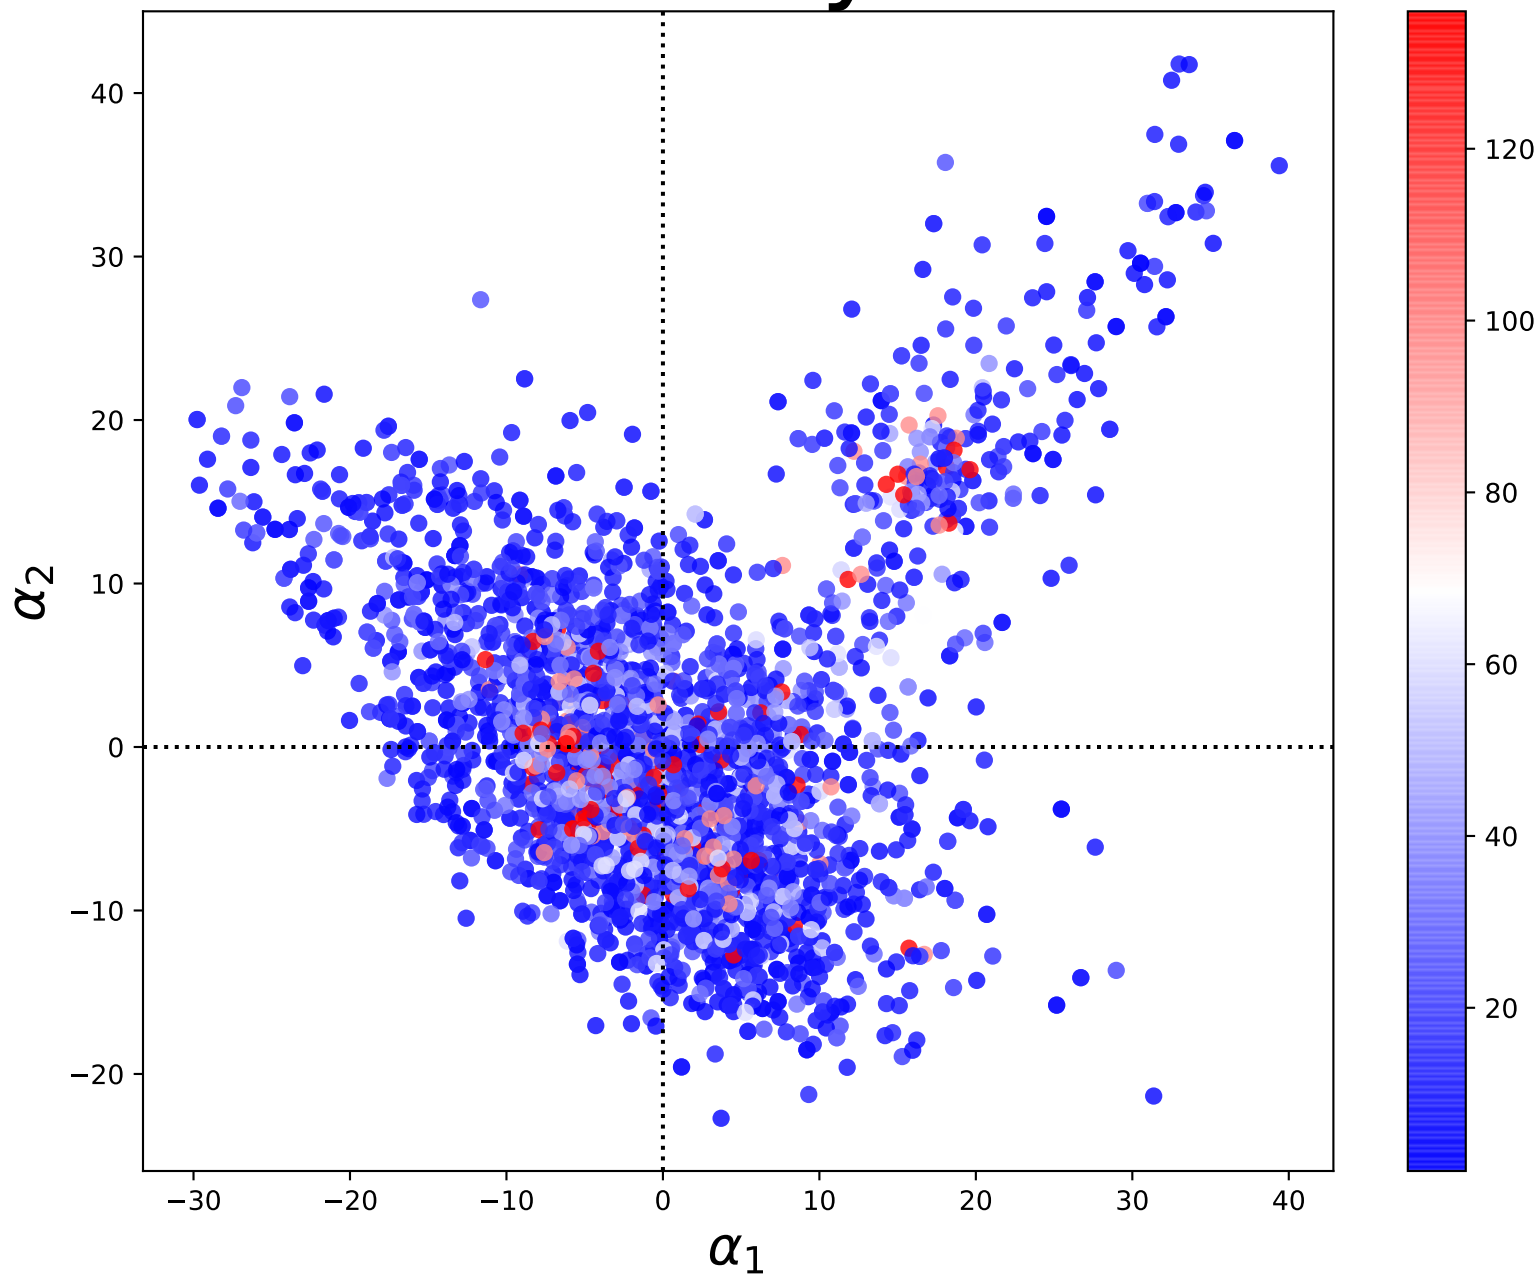

Supplement: OptionalSupplementaryData [file wf_aniso_retrogpt2_8.pdf › plots/appendix_plots/wf_aniso_retrogpt2_8.pdf]

# GPT2 Layer 9

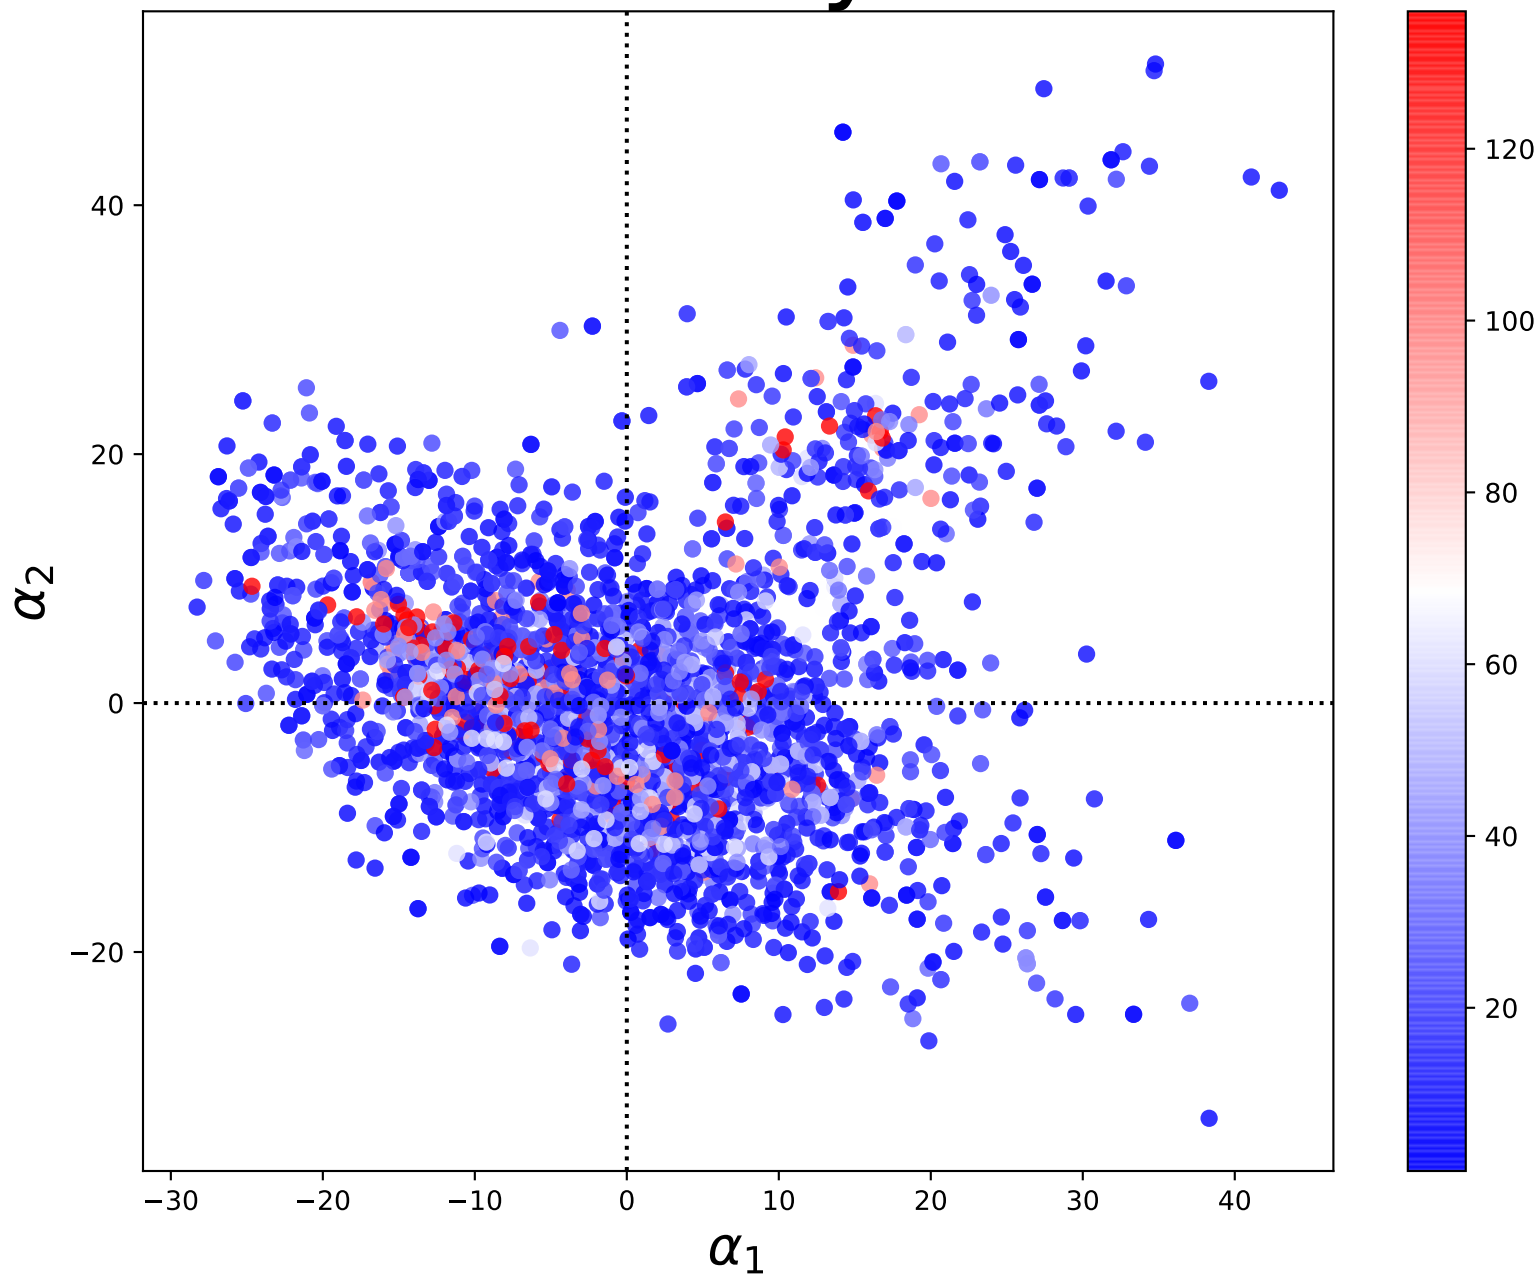

Supplement: OptionalSupplementaryData [file wf_aniso_retrogpt2_9.pdf › plots/appendix_plots/wf_aniso_retrogpt2_9.pdf]

# XLNet Layer 0

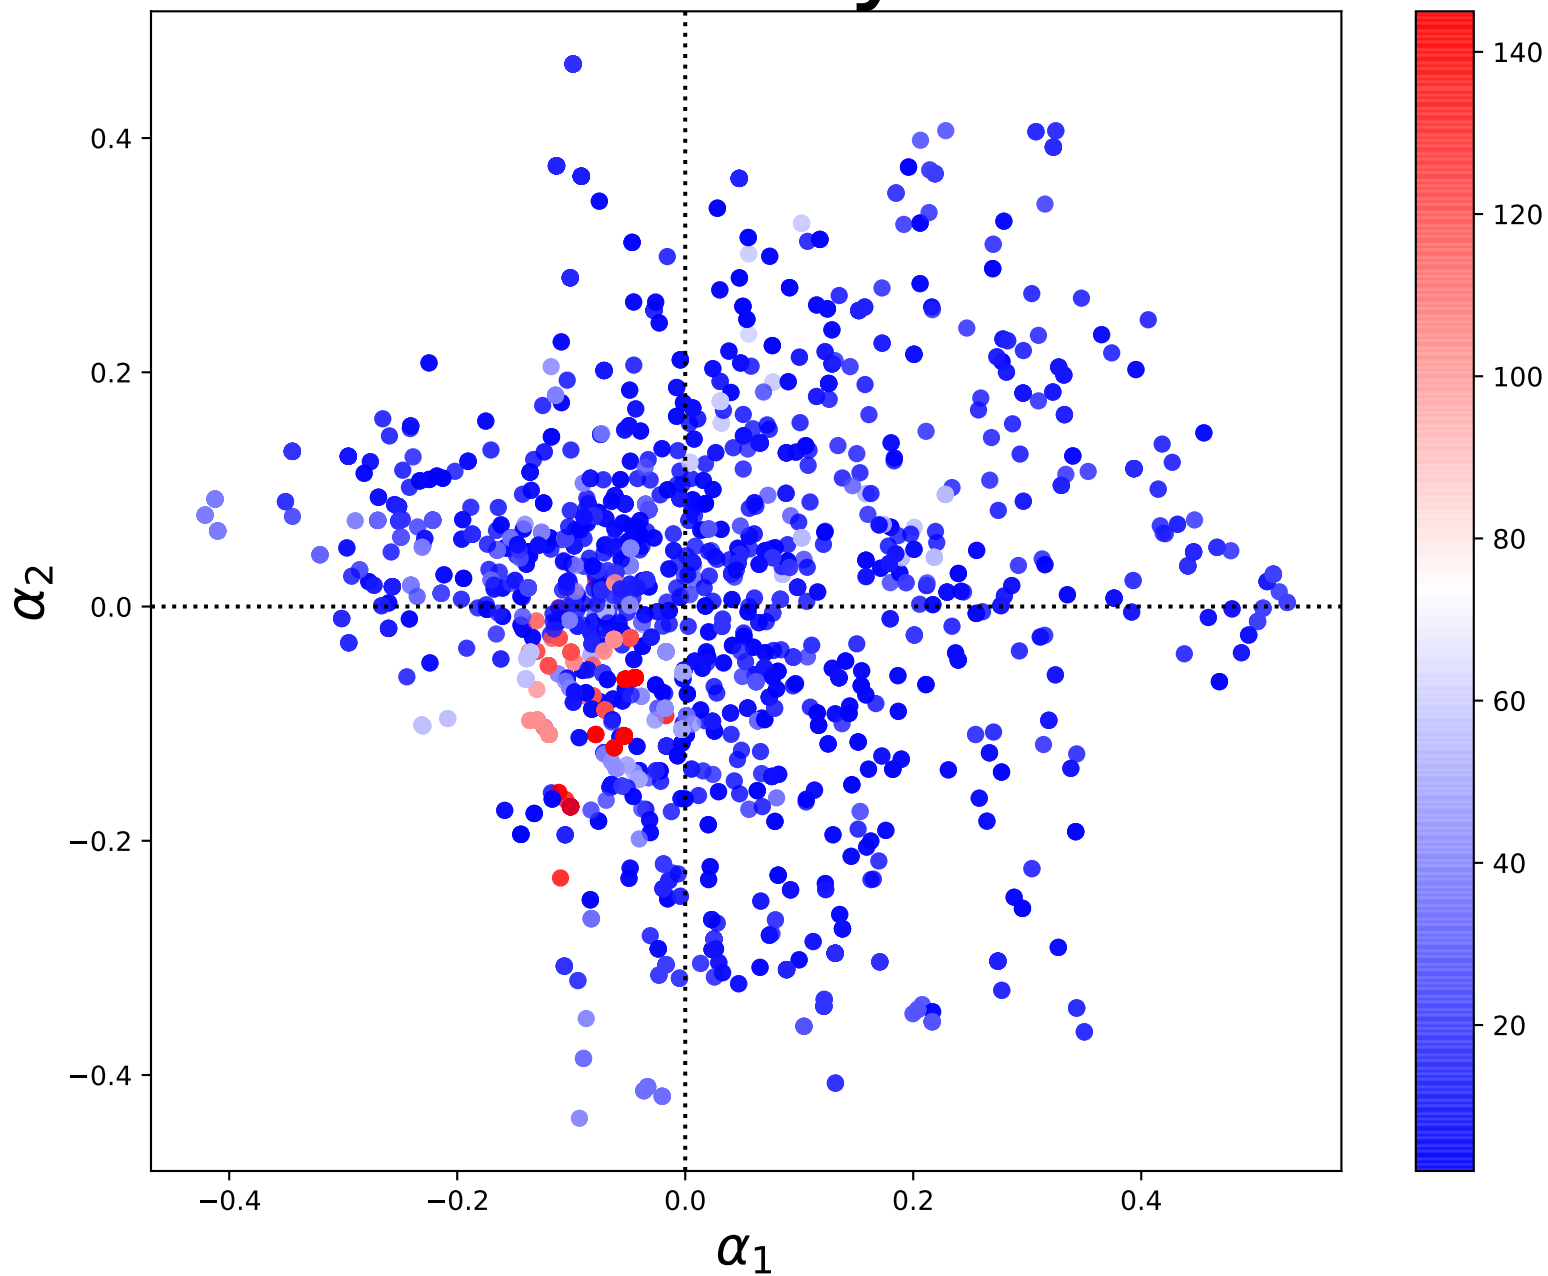

Supplement: OptionalSupplementaryData [file wf_aniso_retroxlnet_0.pdf › plots/appendix_plots/wf_aniso_retroxlnet_0.pdf]

# XLNet Layer 1

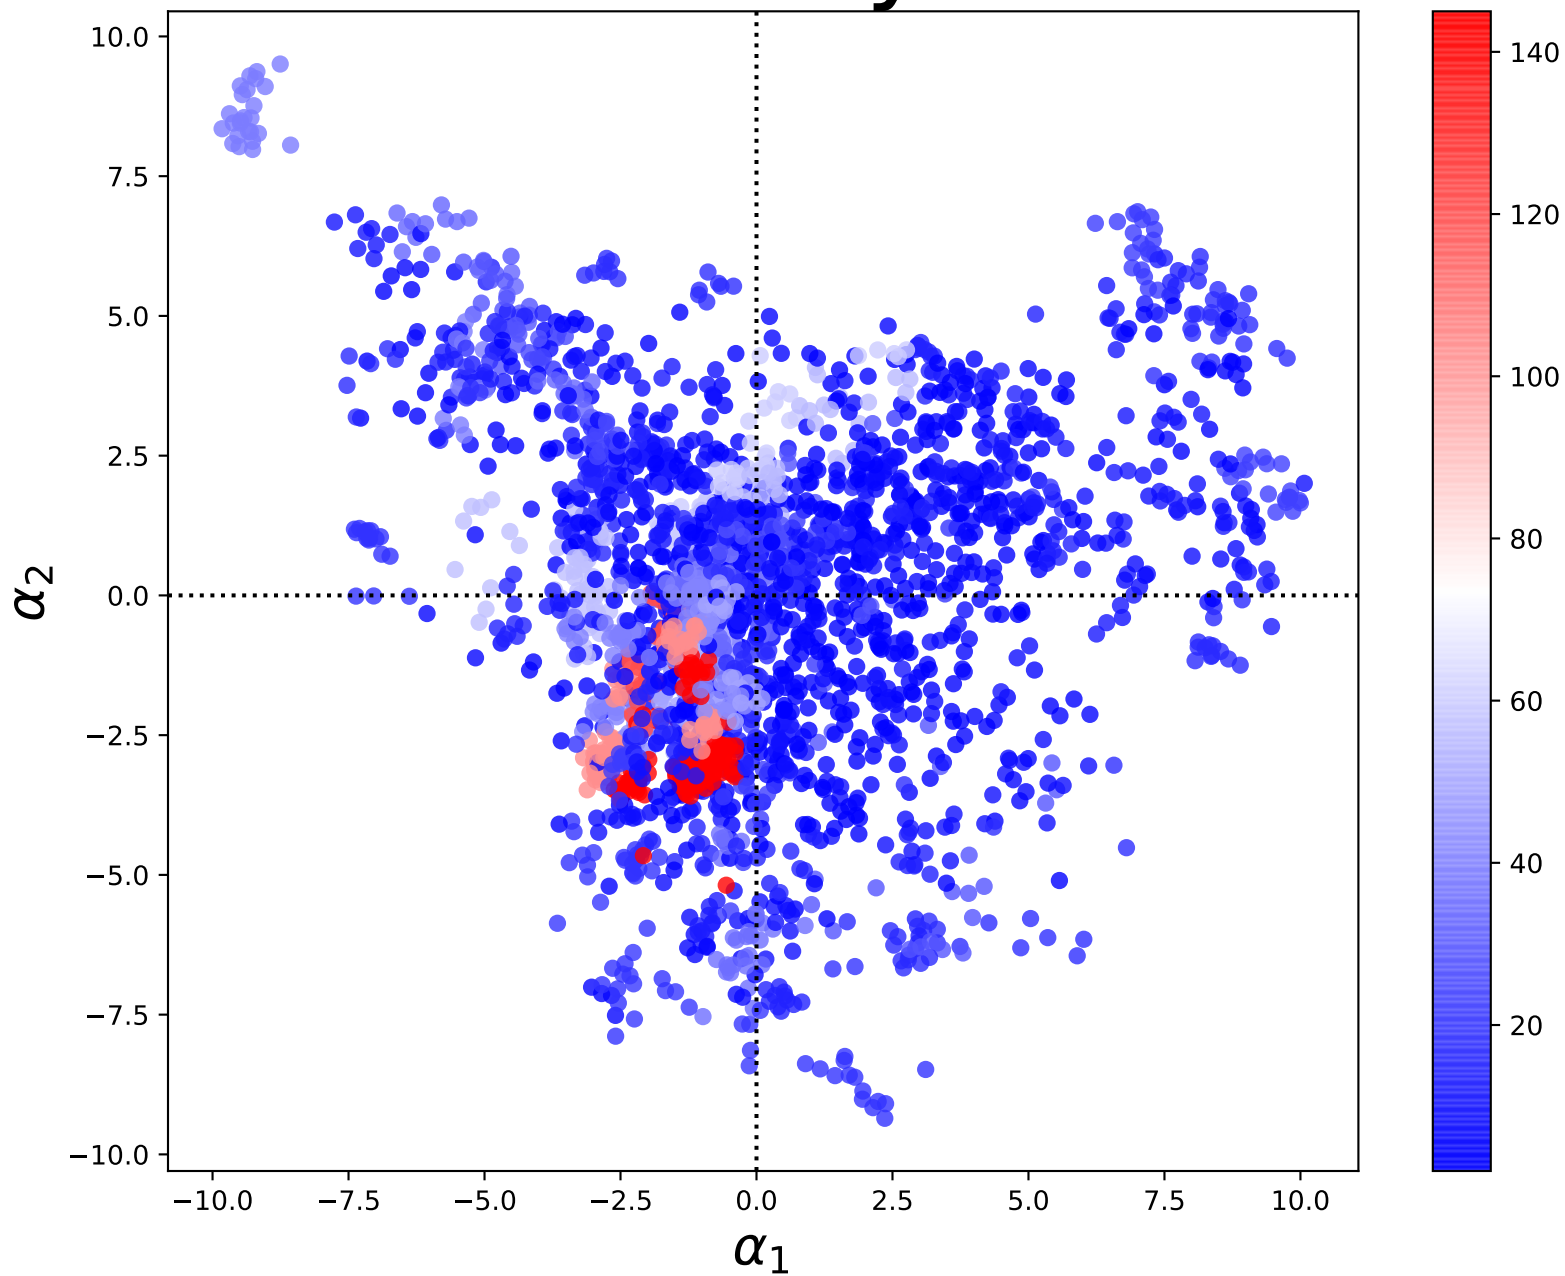

Supplement: OptionalSupplementaryData [file wf_aniso_retroxlnet_1.pdf › plots/appendix_plots/wf_aniso_retroxlnet_1.pdf]

# XLNet Layer 10

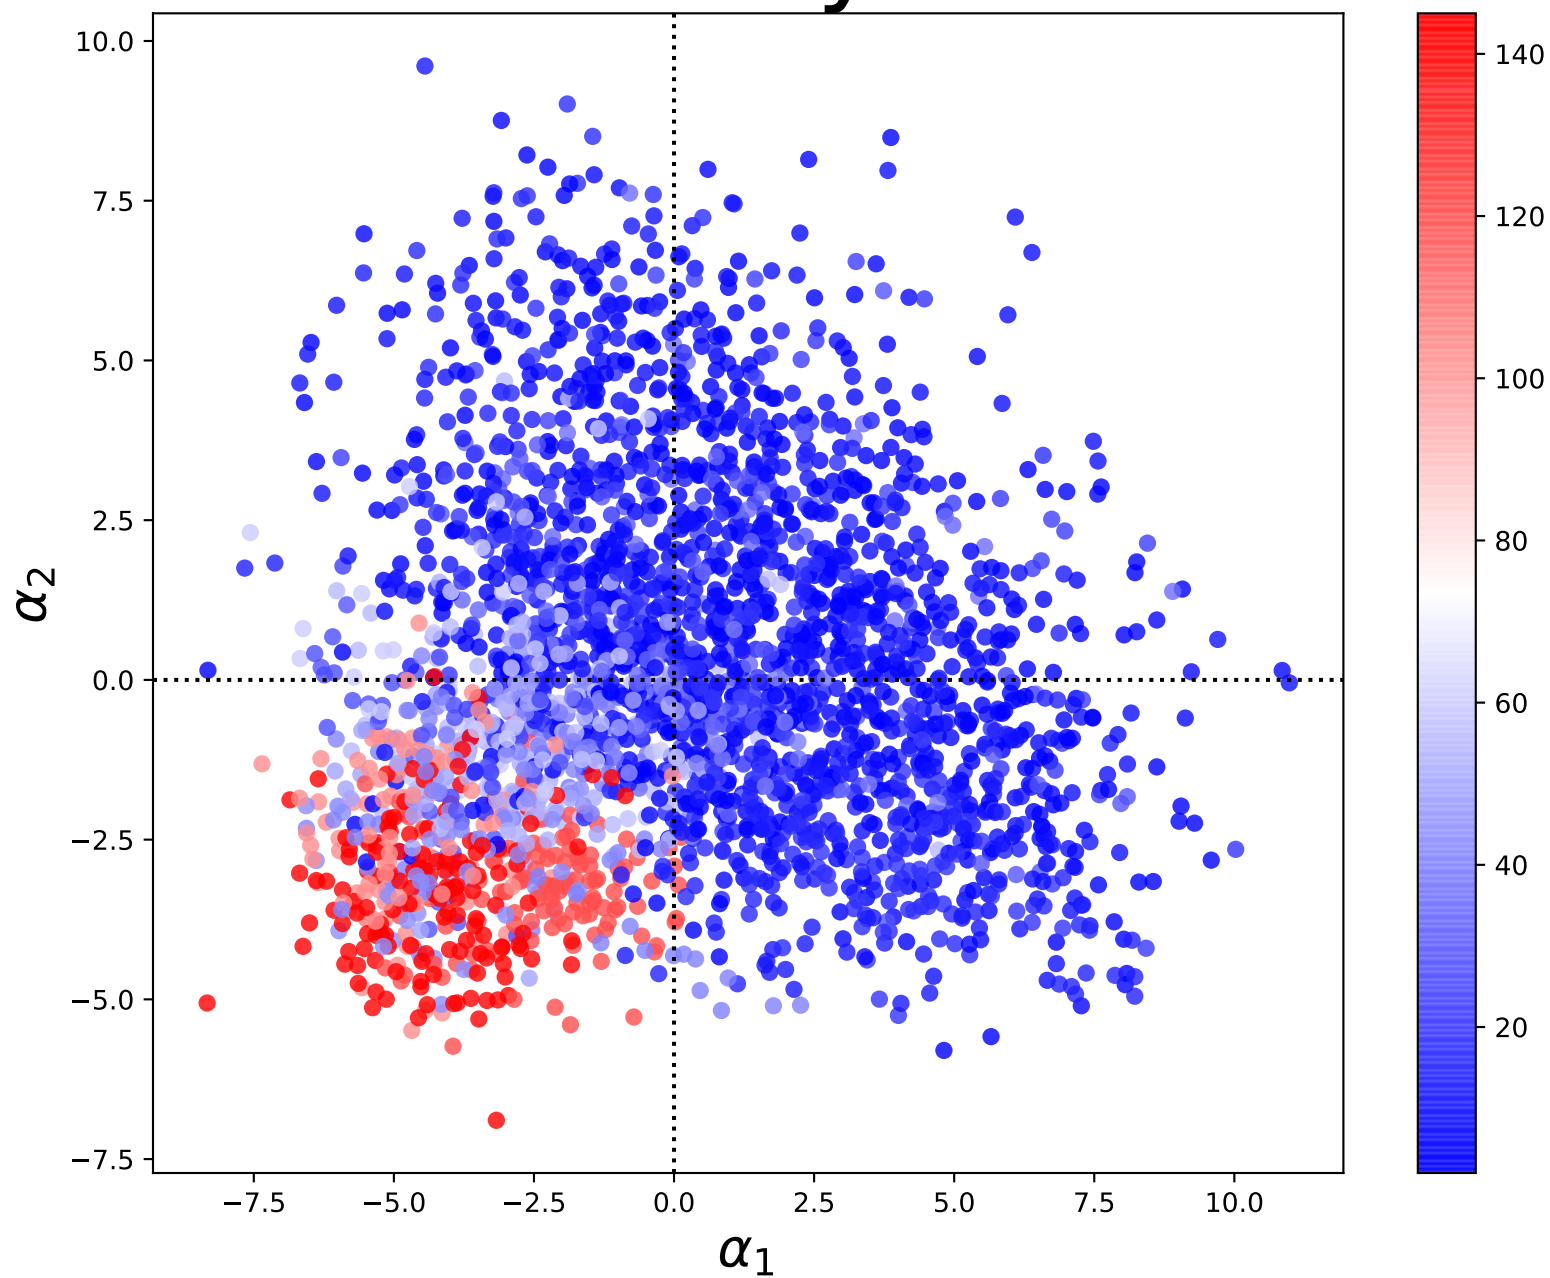

Supplement: OptionalSupplementaryData [file wf_aniso_retroxlnet_10.pdf › plots/appendix_plots/wf_aniso_retroxlnet_10.pdf]

# XLNet Layer 11

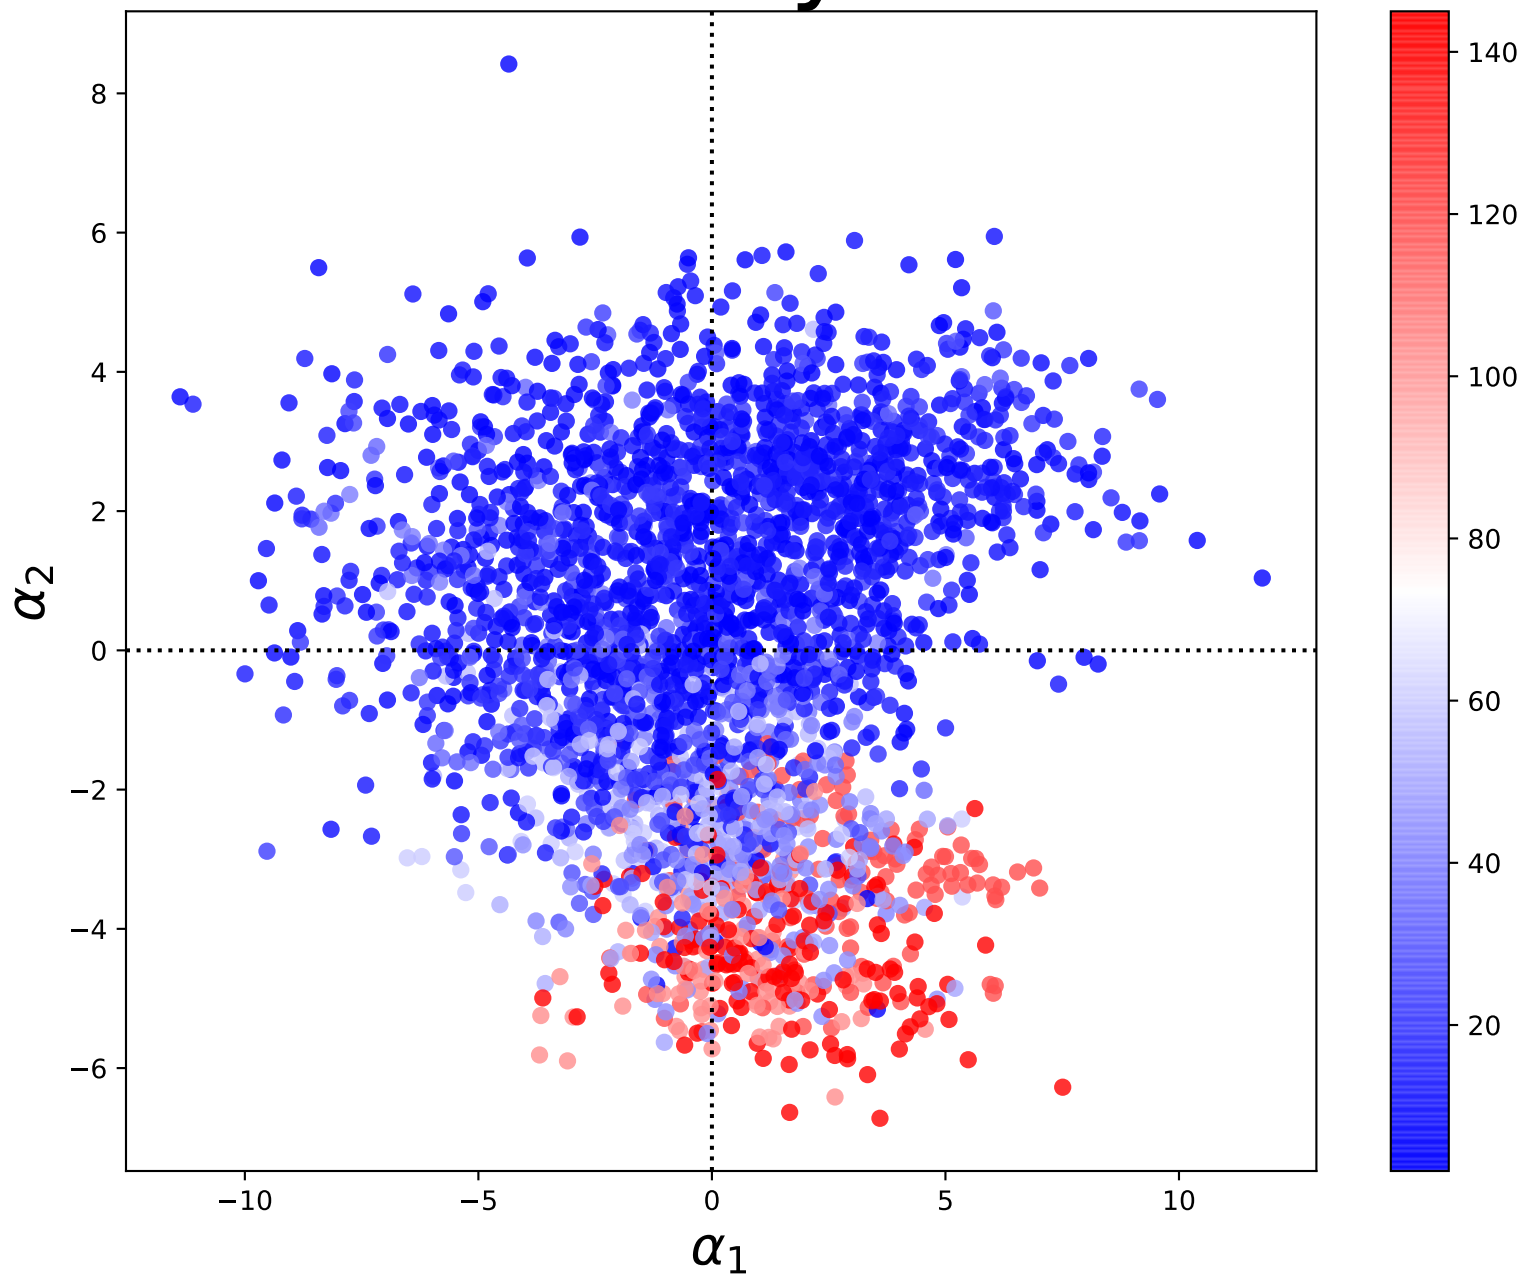

Supplement: OptionalSupplementaryData [file wf_aniso_retroxlnet_11.pdf › plots/appendix_plots/wf_aniso_retroxlnet_11.pdf]

# XLNet Layer 12

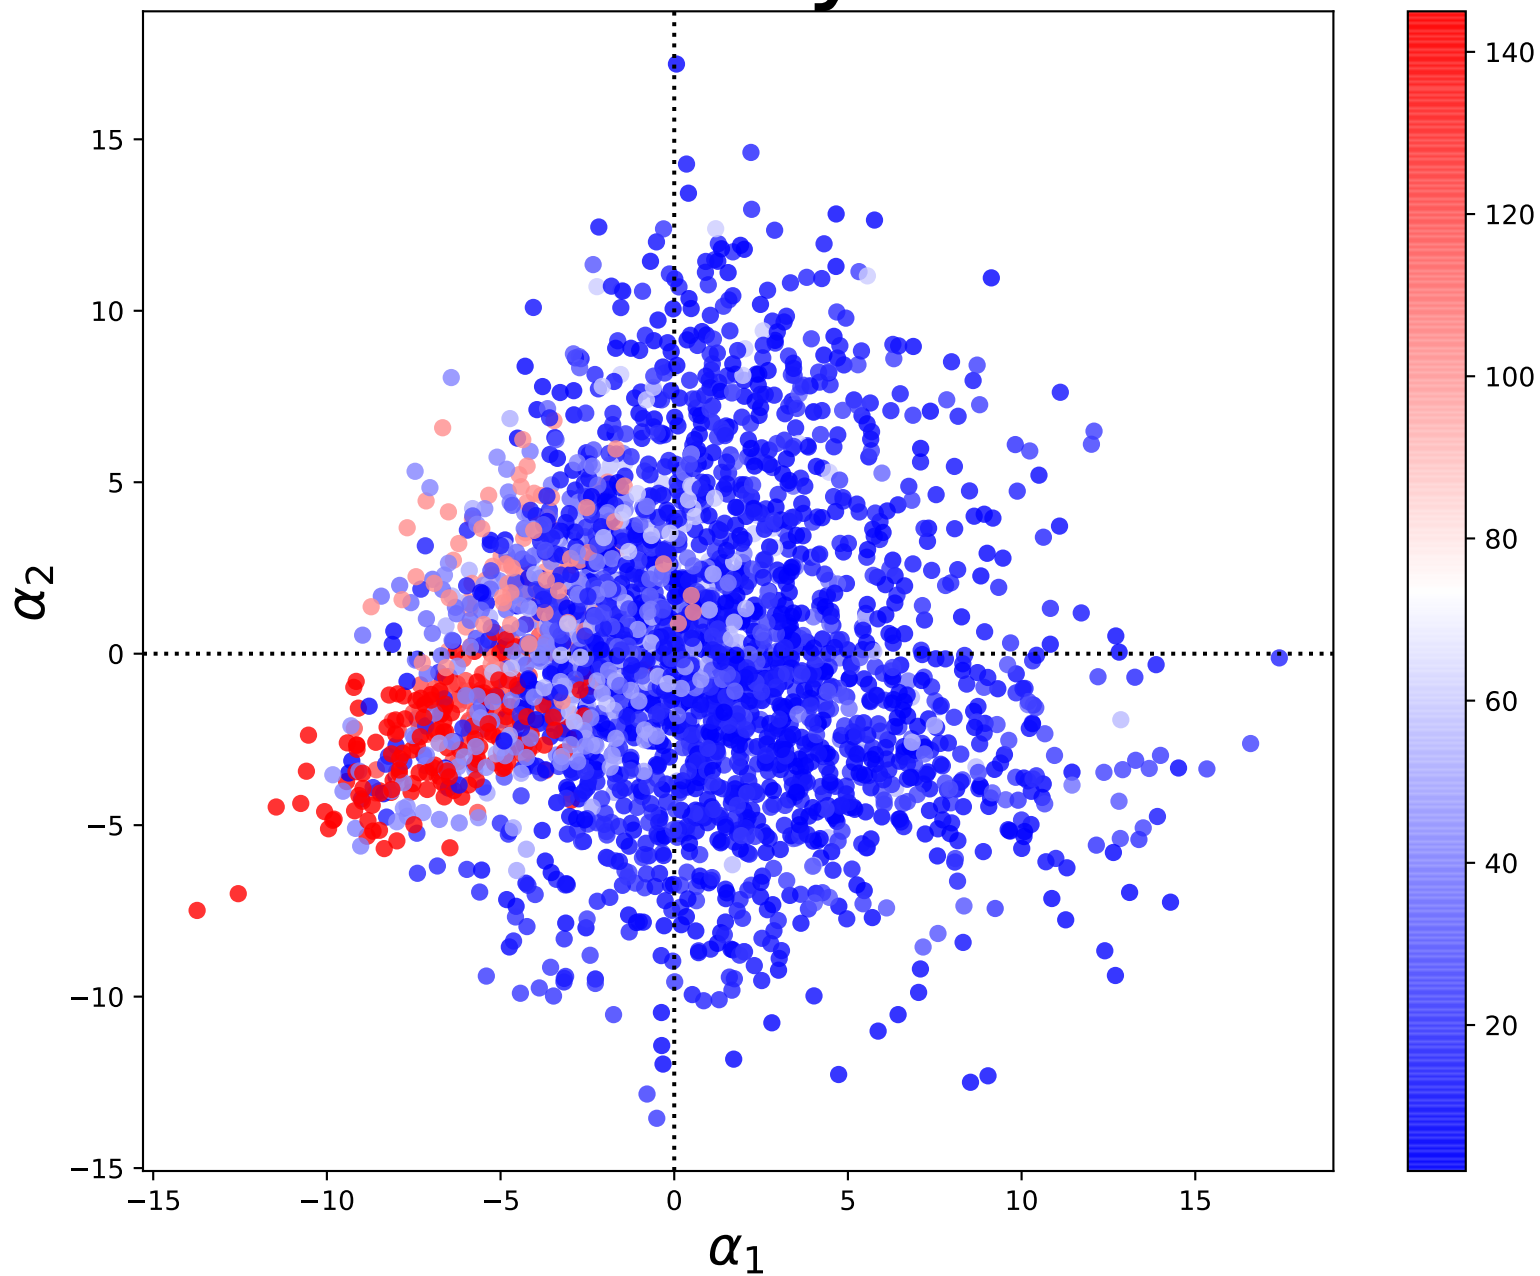

Supplement: OptionalSupplementaryData [file wf_aniso_retroxlnet_12.pdf › plots/appendix_plots/wf_aniso_retroxlnet_12.pdf]

# XLNet Layer 2

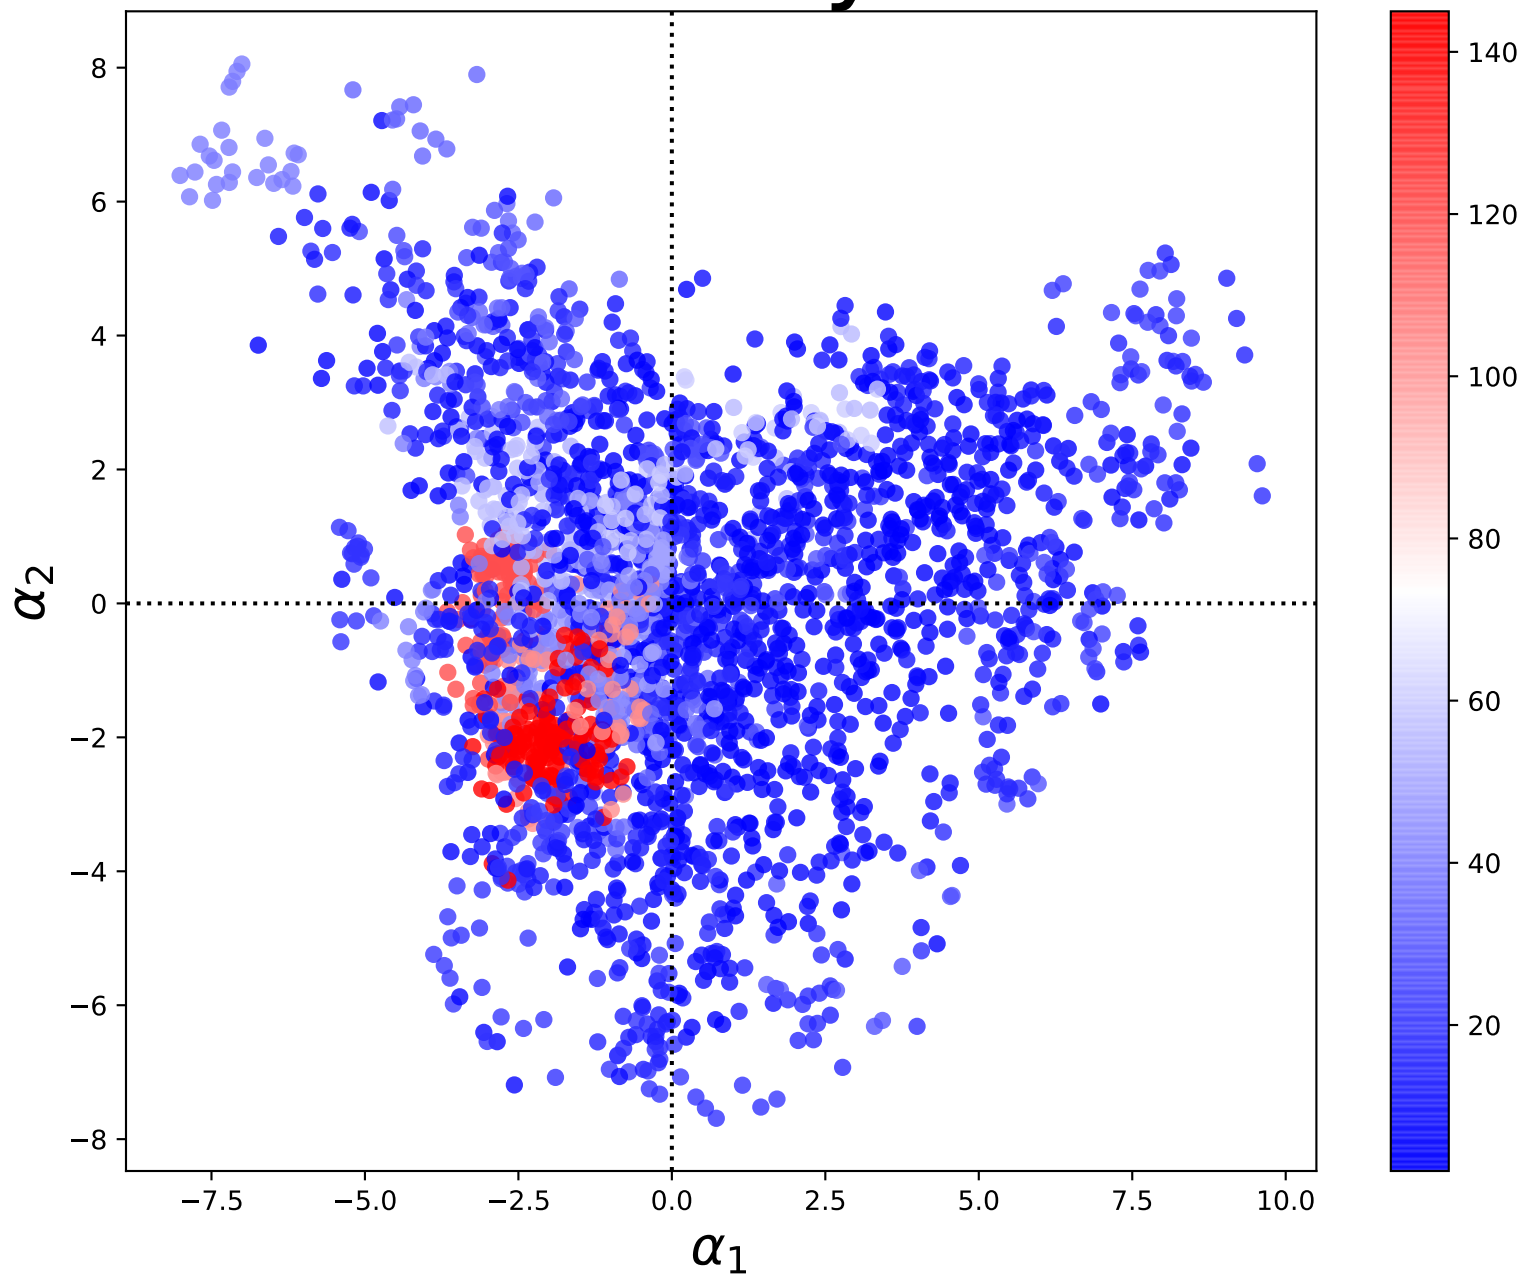

Supplement: OptionalSupplementaryData [file wf_aniso_retroxlnet_2.pdf › plots/appendix_plots/wf_aniso_retroxlnet_2.pdf]

# XLNet Layer 3

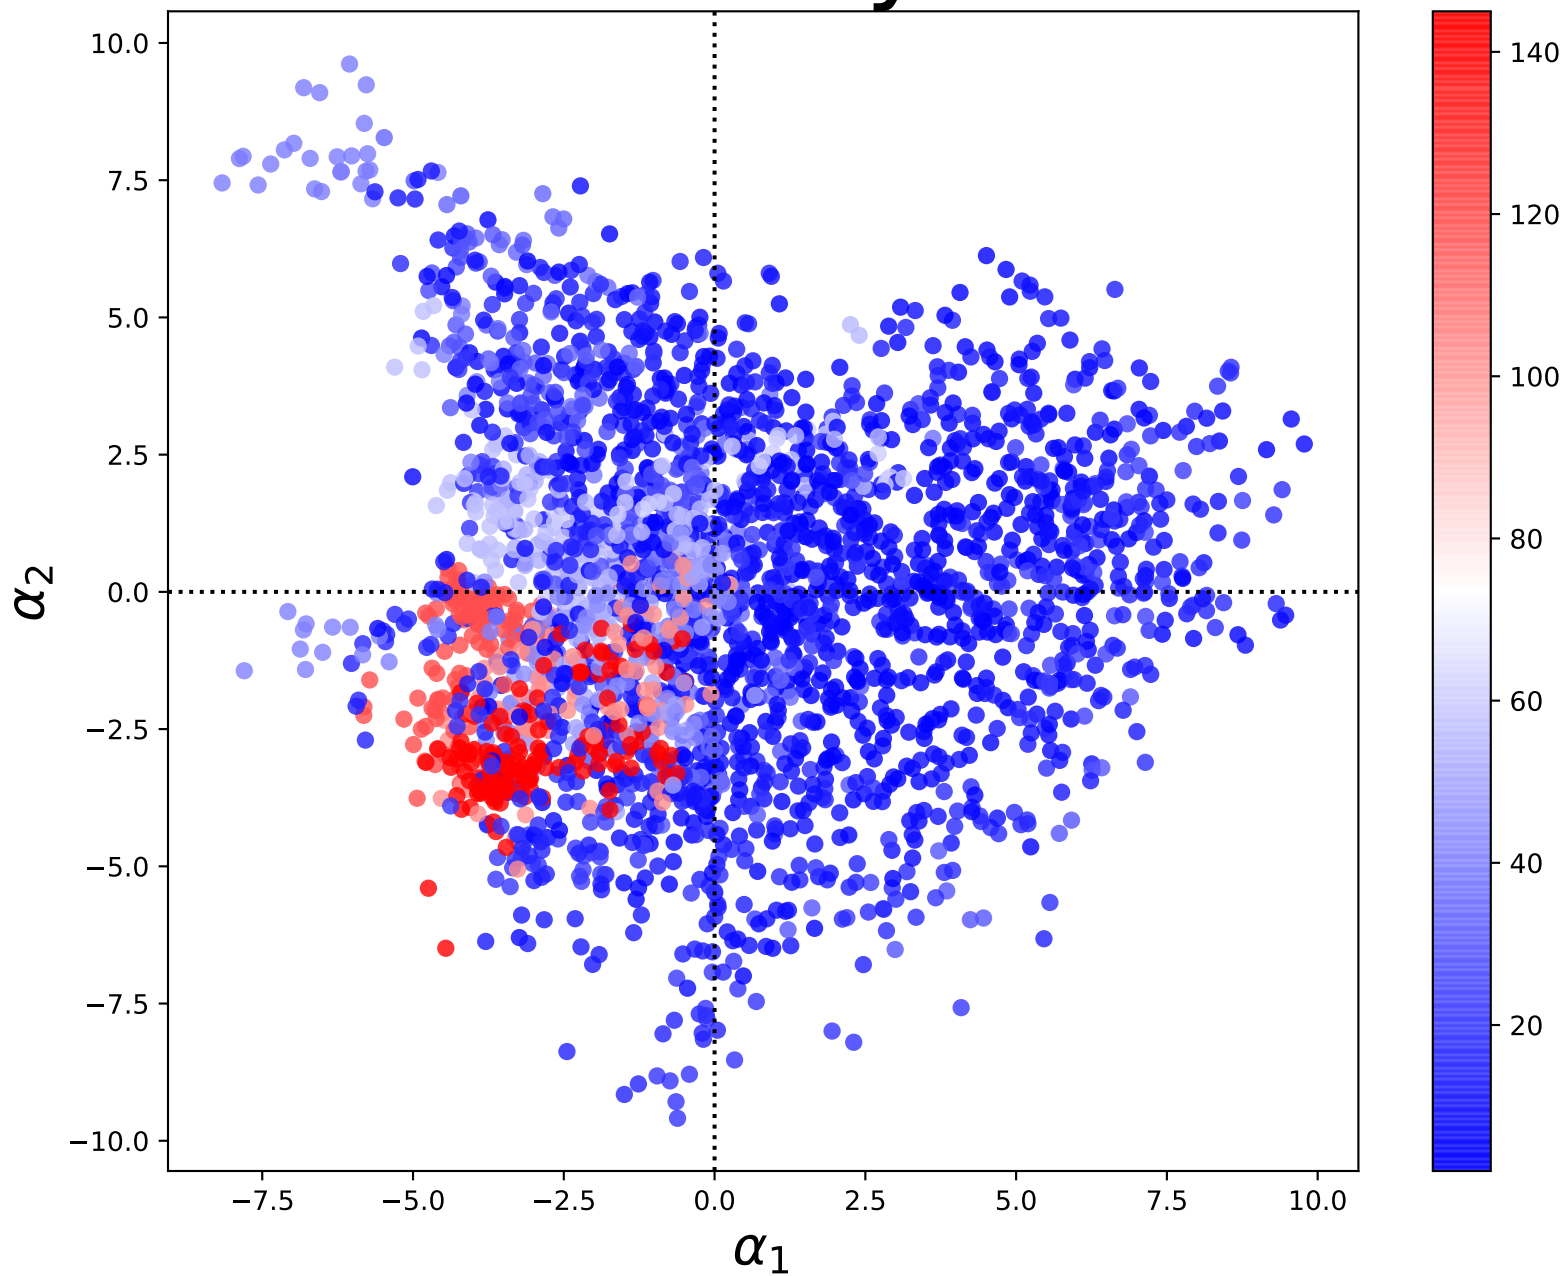

Supplement: OptionalSupplementaryData [file wf_aniso_retroxlnet_3.pdf › plots/appendix_plots/wf_aniso_retroxlnet_3.pdf]

# XLNet Layer 4

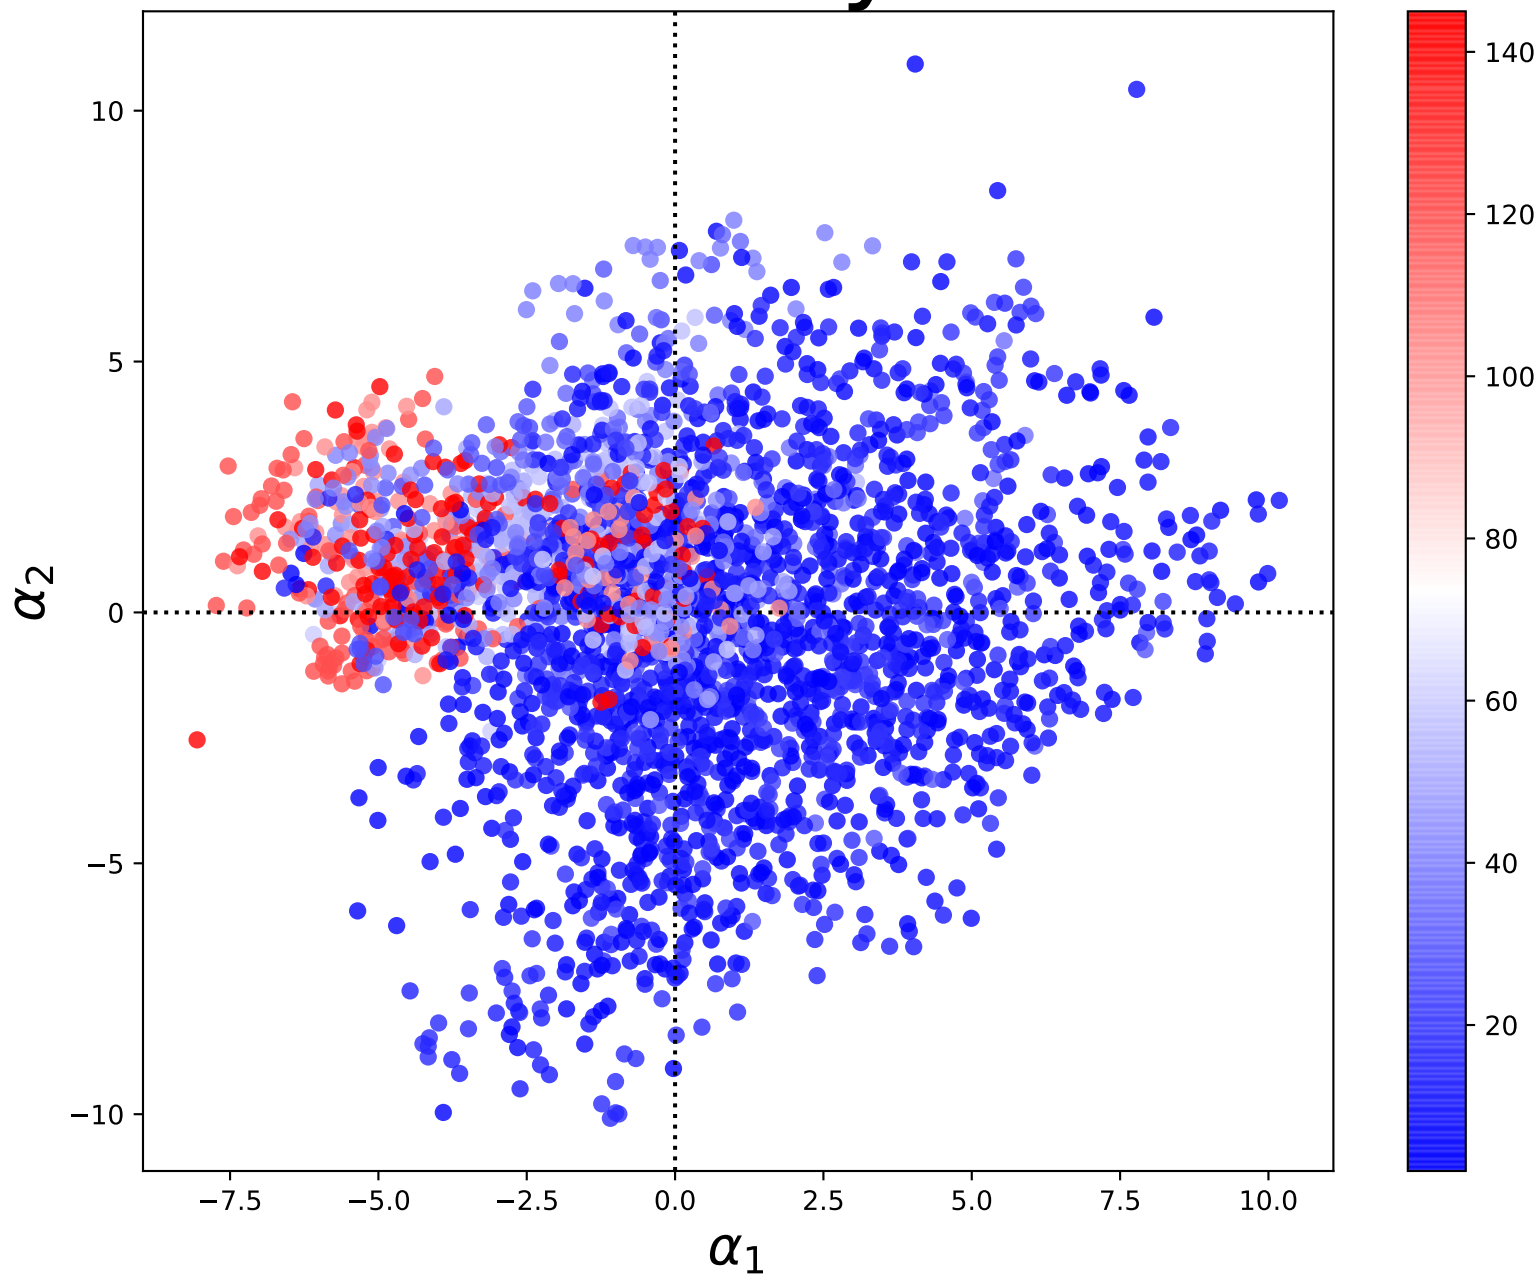

Supplement: OptionalSupplementaryData [file wf_aniso_retroxlnet_4.pdf › plots/appendix_plots/wf_aniso_retroxlnet_4.pdf]

# XLNet Layer 5

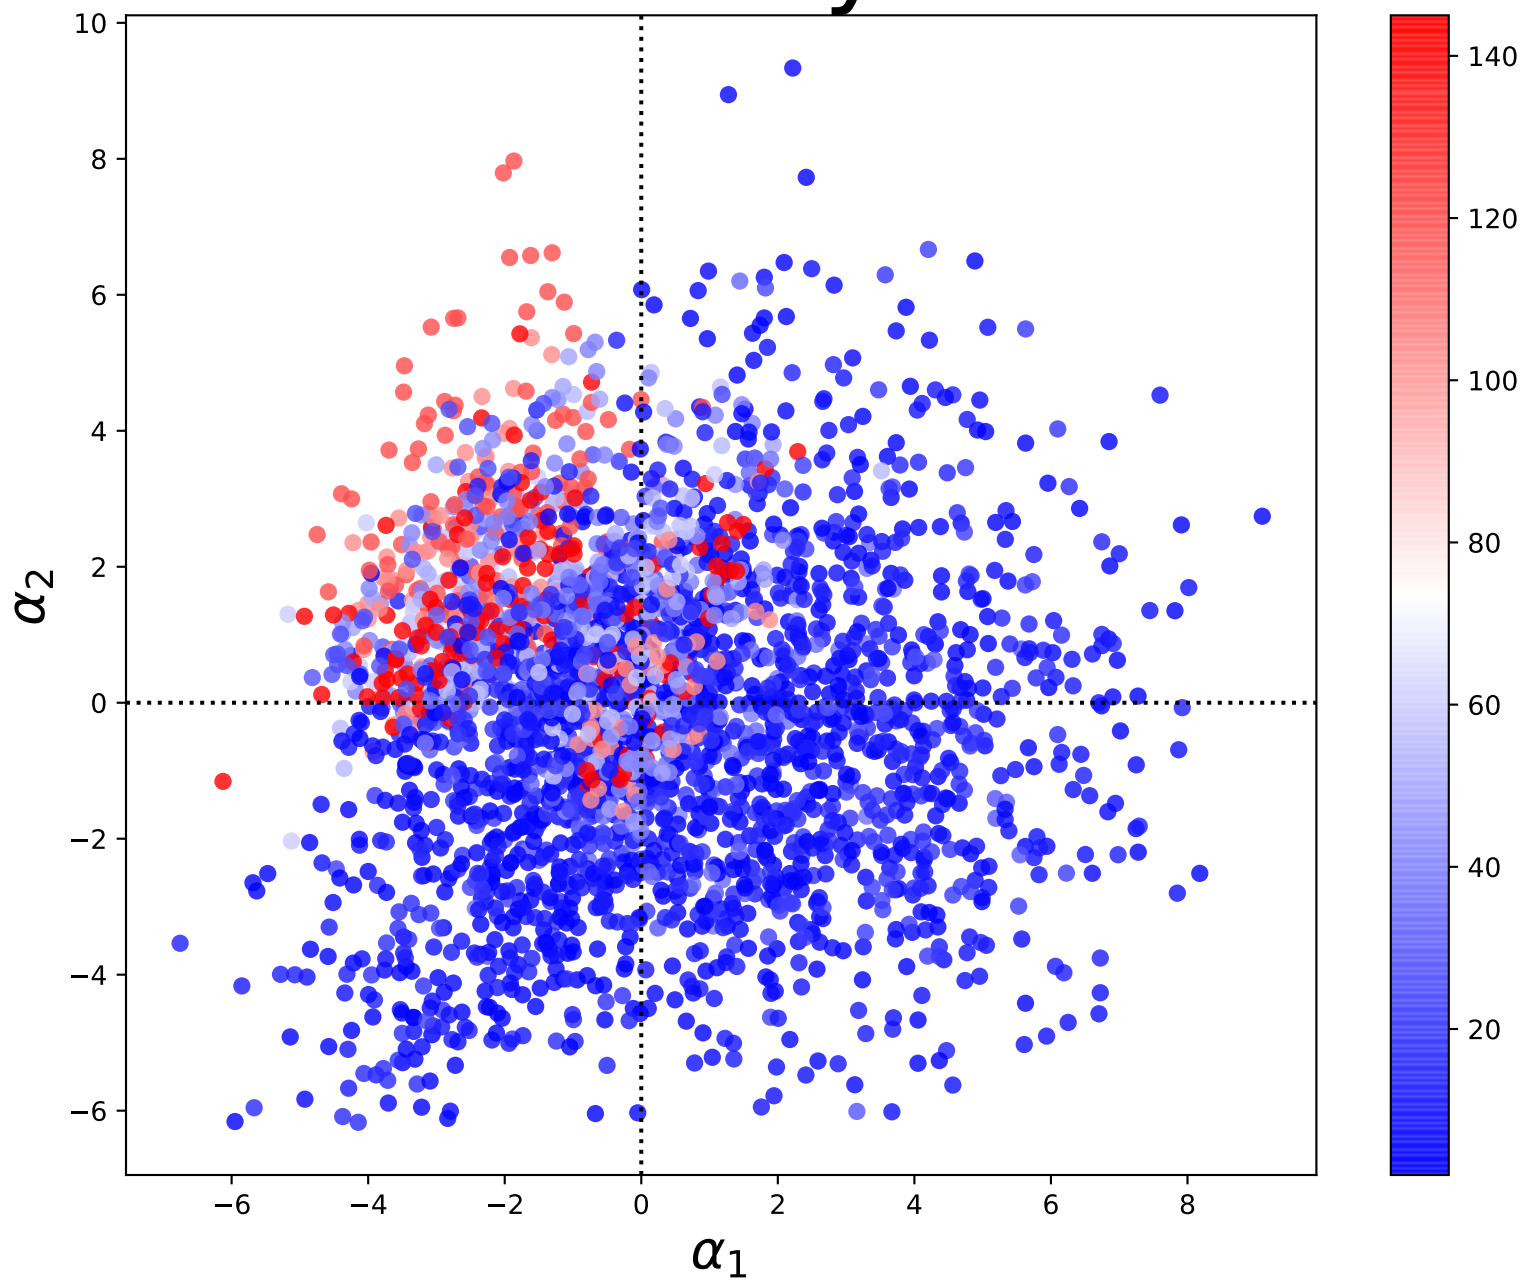

Supplement: OptionalSupplementaryData [file wf_aniso_retroxlnet_5.pdf › plots/appendix_plots/wf_aniso_retroxlnet_5.pdf]

# XLNet Layer 6

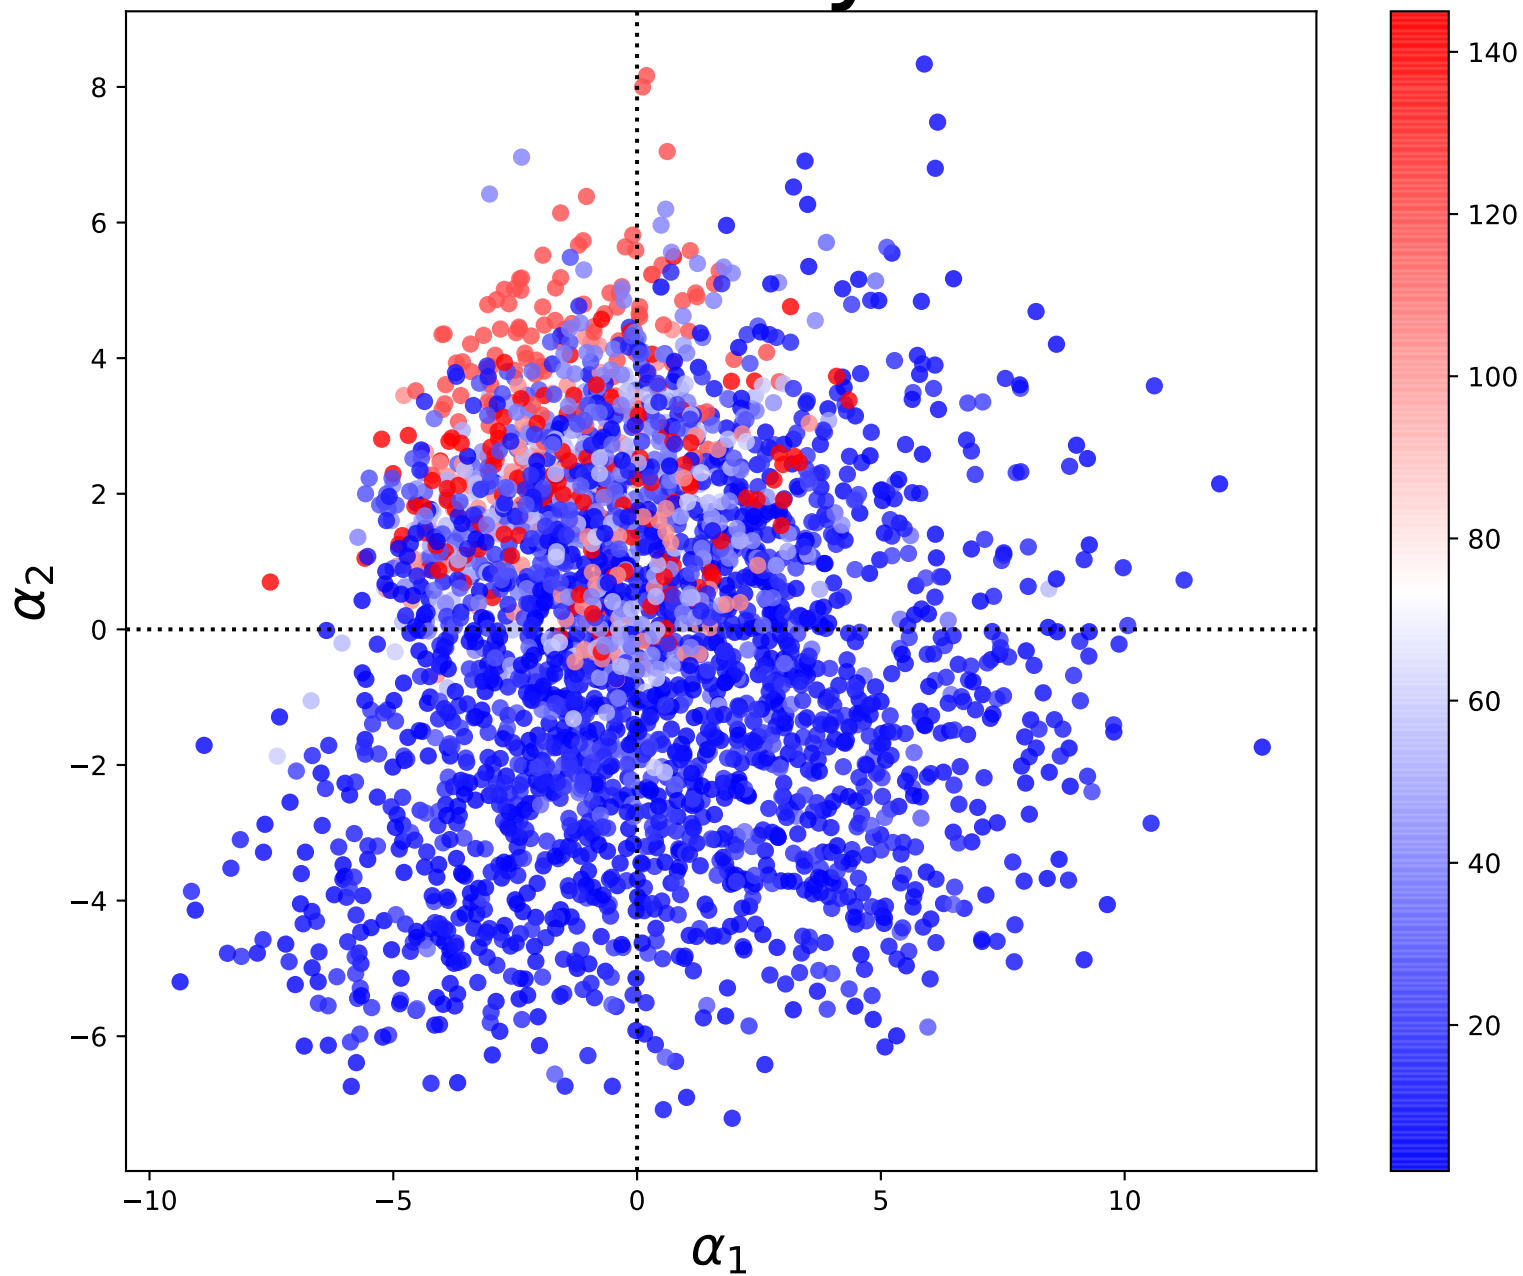

Supplement: OptionalSupplementaryData [file wf_aniso_retroxlnet_6.pdf › plots/appendix_plots/wf_aniso_retroxlnet_6.pdf]

# XLNet Layer 7

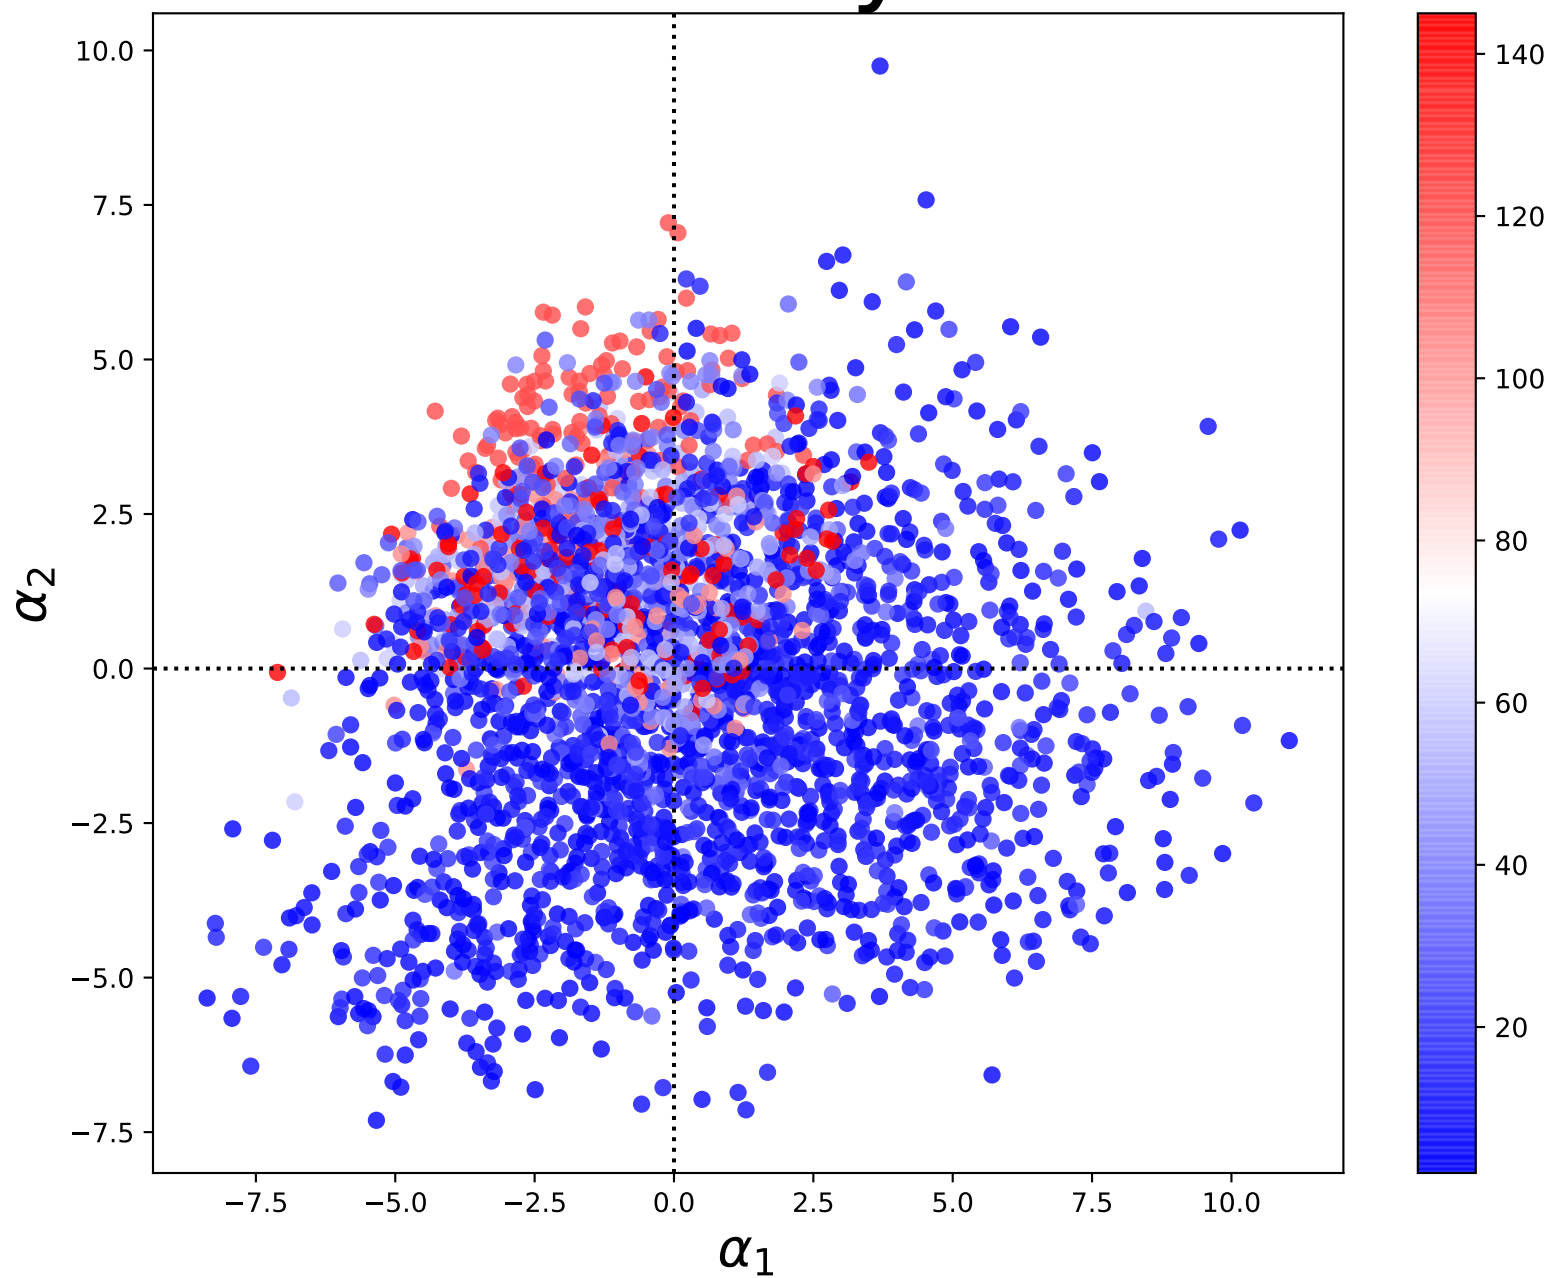

Supplement: OptionalSupplementaryData [file wf_aniso_retroxlnet_7.pdf › plots/appendix_plots/wf_aniso_retroxlnet_7.pdf]

# XLNet Layer 8

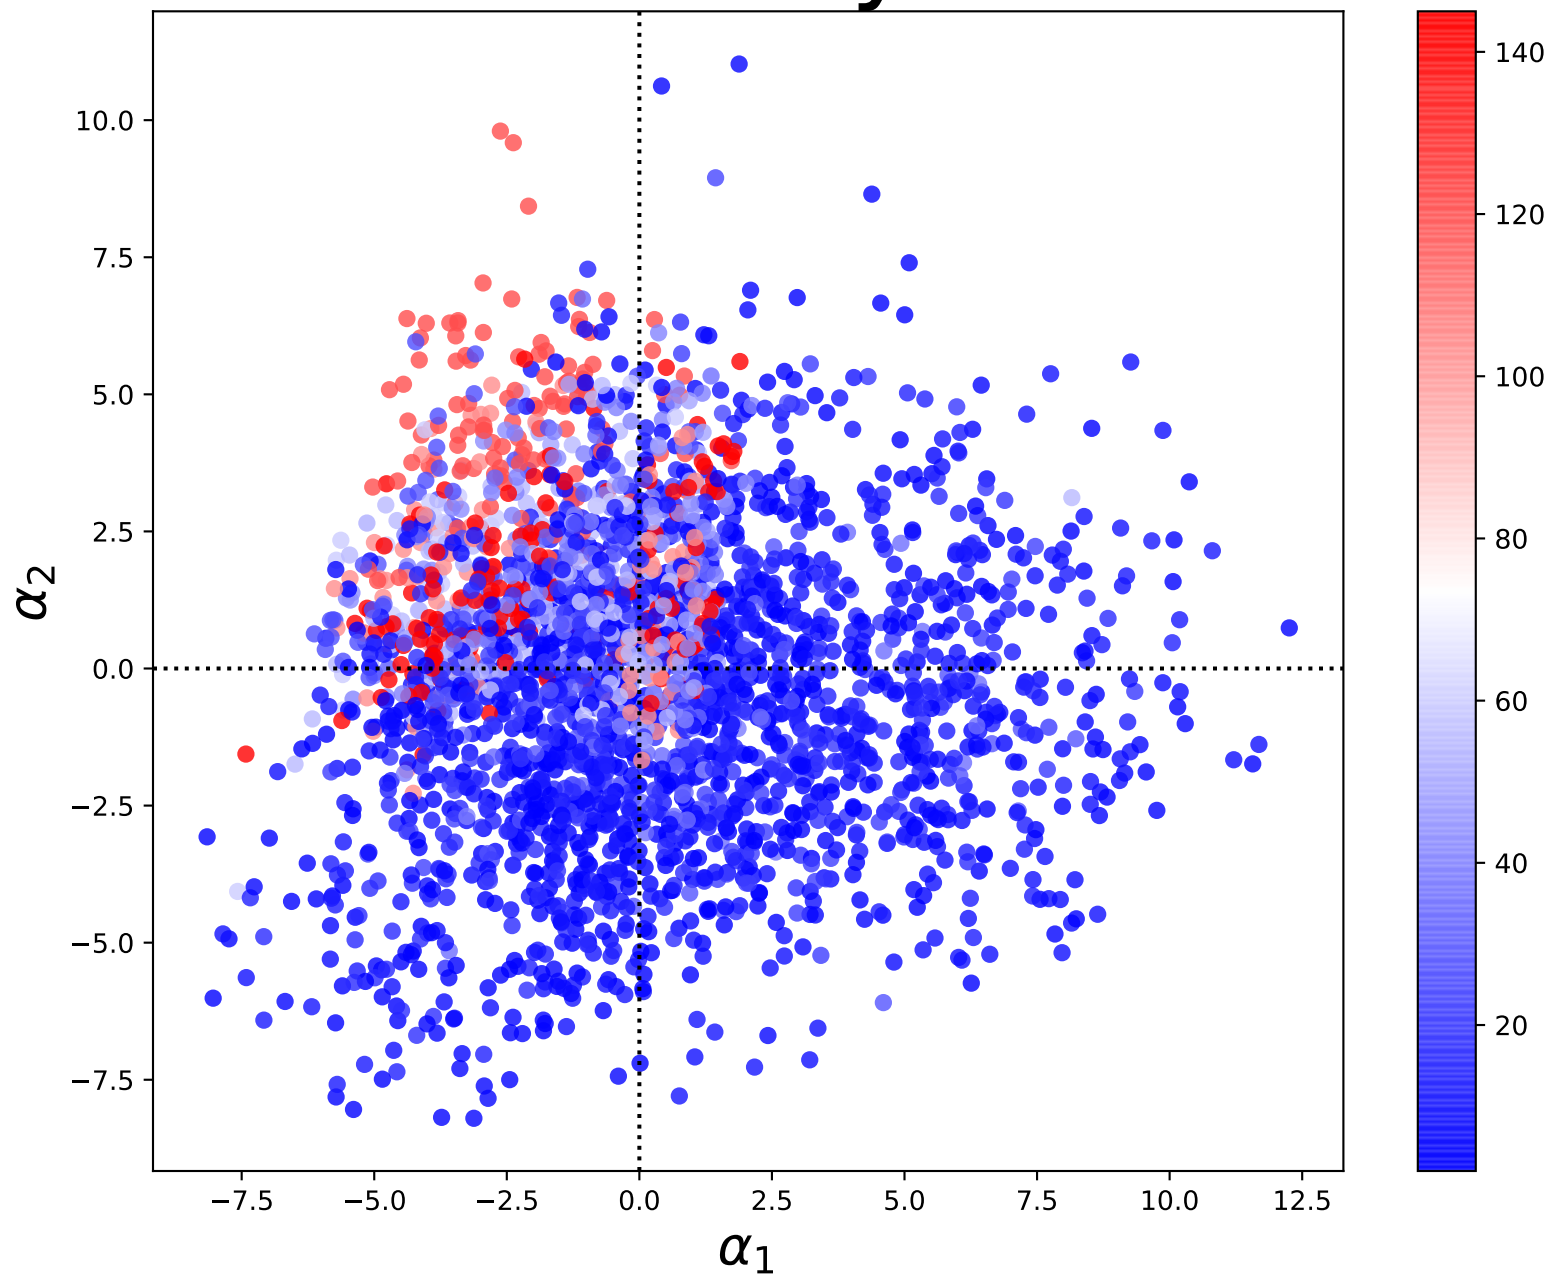

Supplement: OptionalSupplementaryData [file wf_aniso_retroxlnet_8.pdf › plots/appendix_plots/wf_aniso_retroxlnet_8.pdf]

# XLNet Layer 9

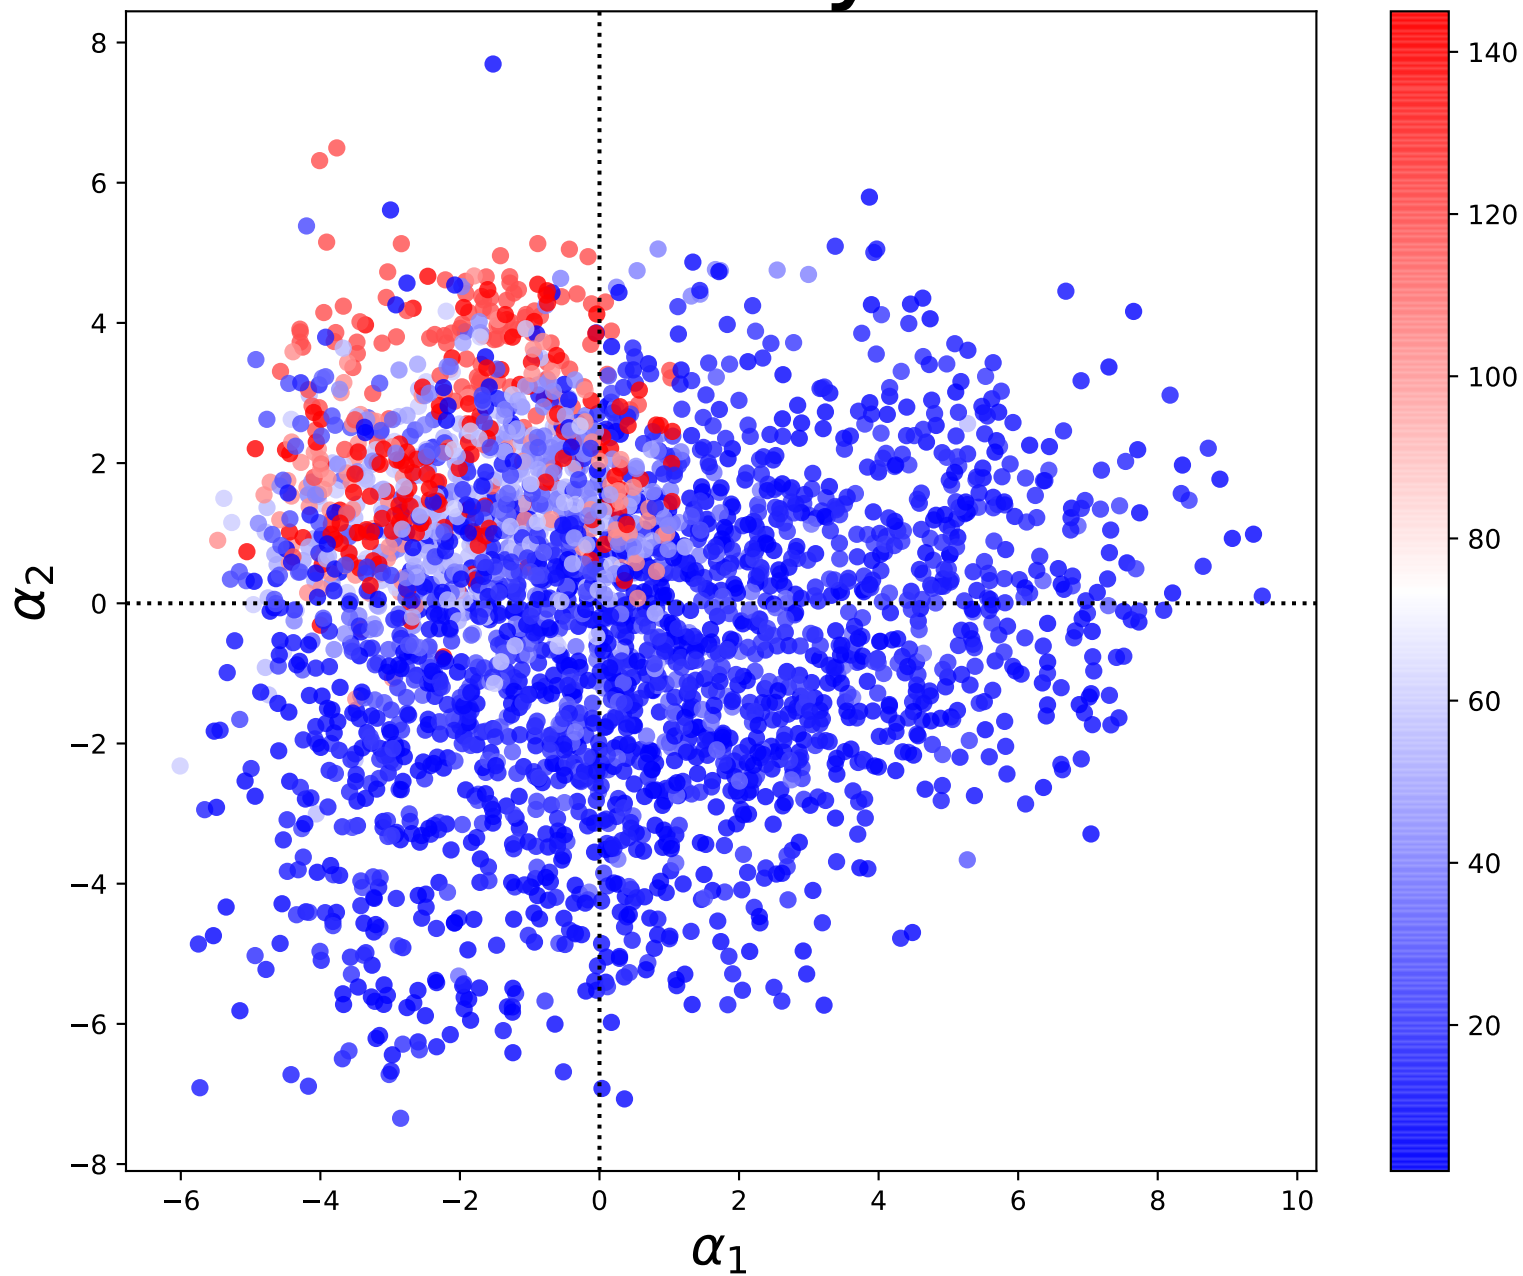

Supplement: OptionalSupplementaryData [file wf_aniso_retroxlnet_9.pdf › plots/appendix_plots/wf_aniso_retroxlnet_9.pdf]

# XLNet Layer 0

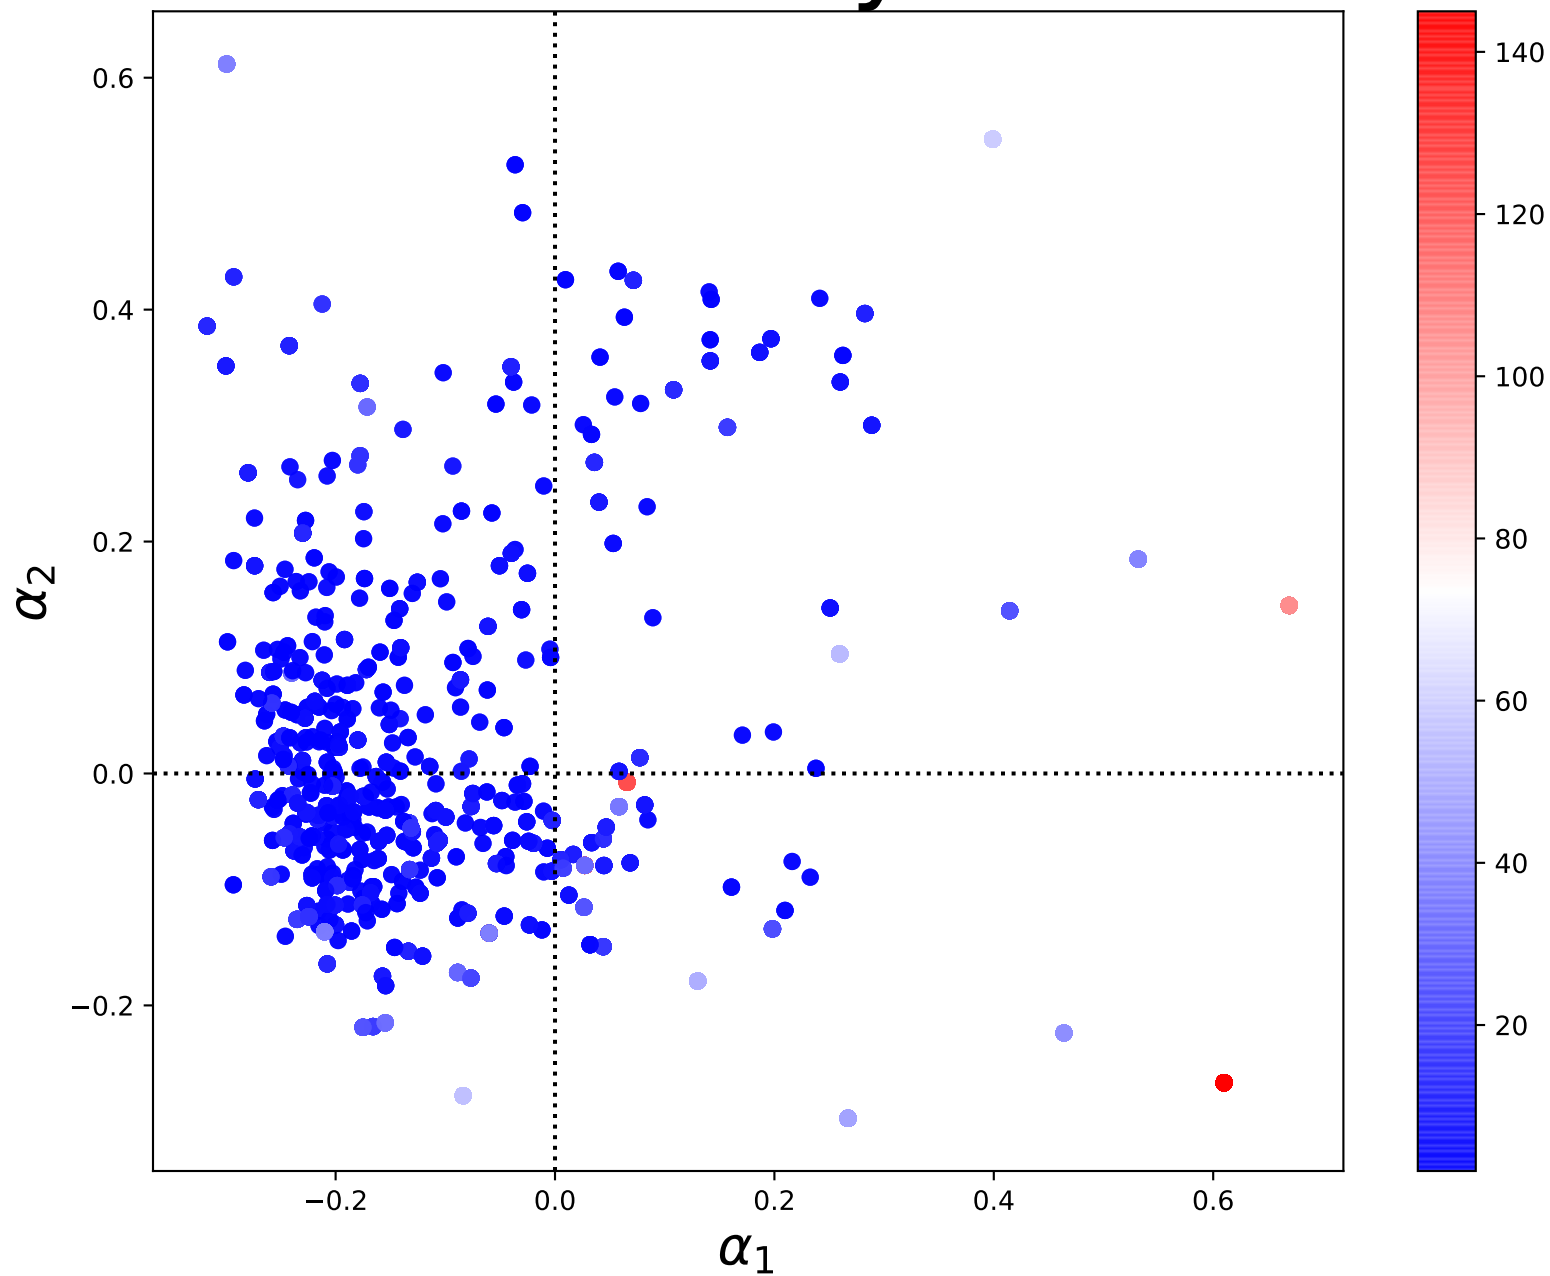

Supplement: OptionalSupplementaryData [file wf_aniso_xlnet_0.pdf › plots/appendix_plots/wf_aniso_xlnet_0.pdf]

# XLNet Layer 1

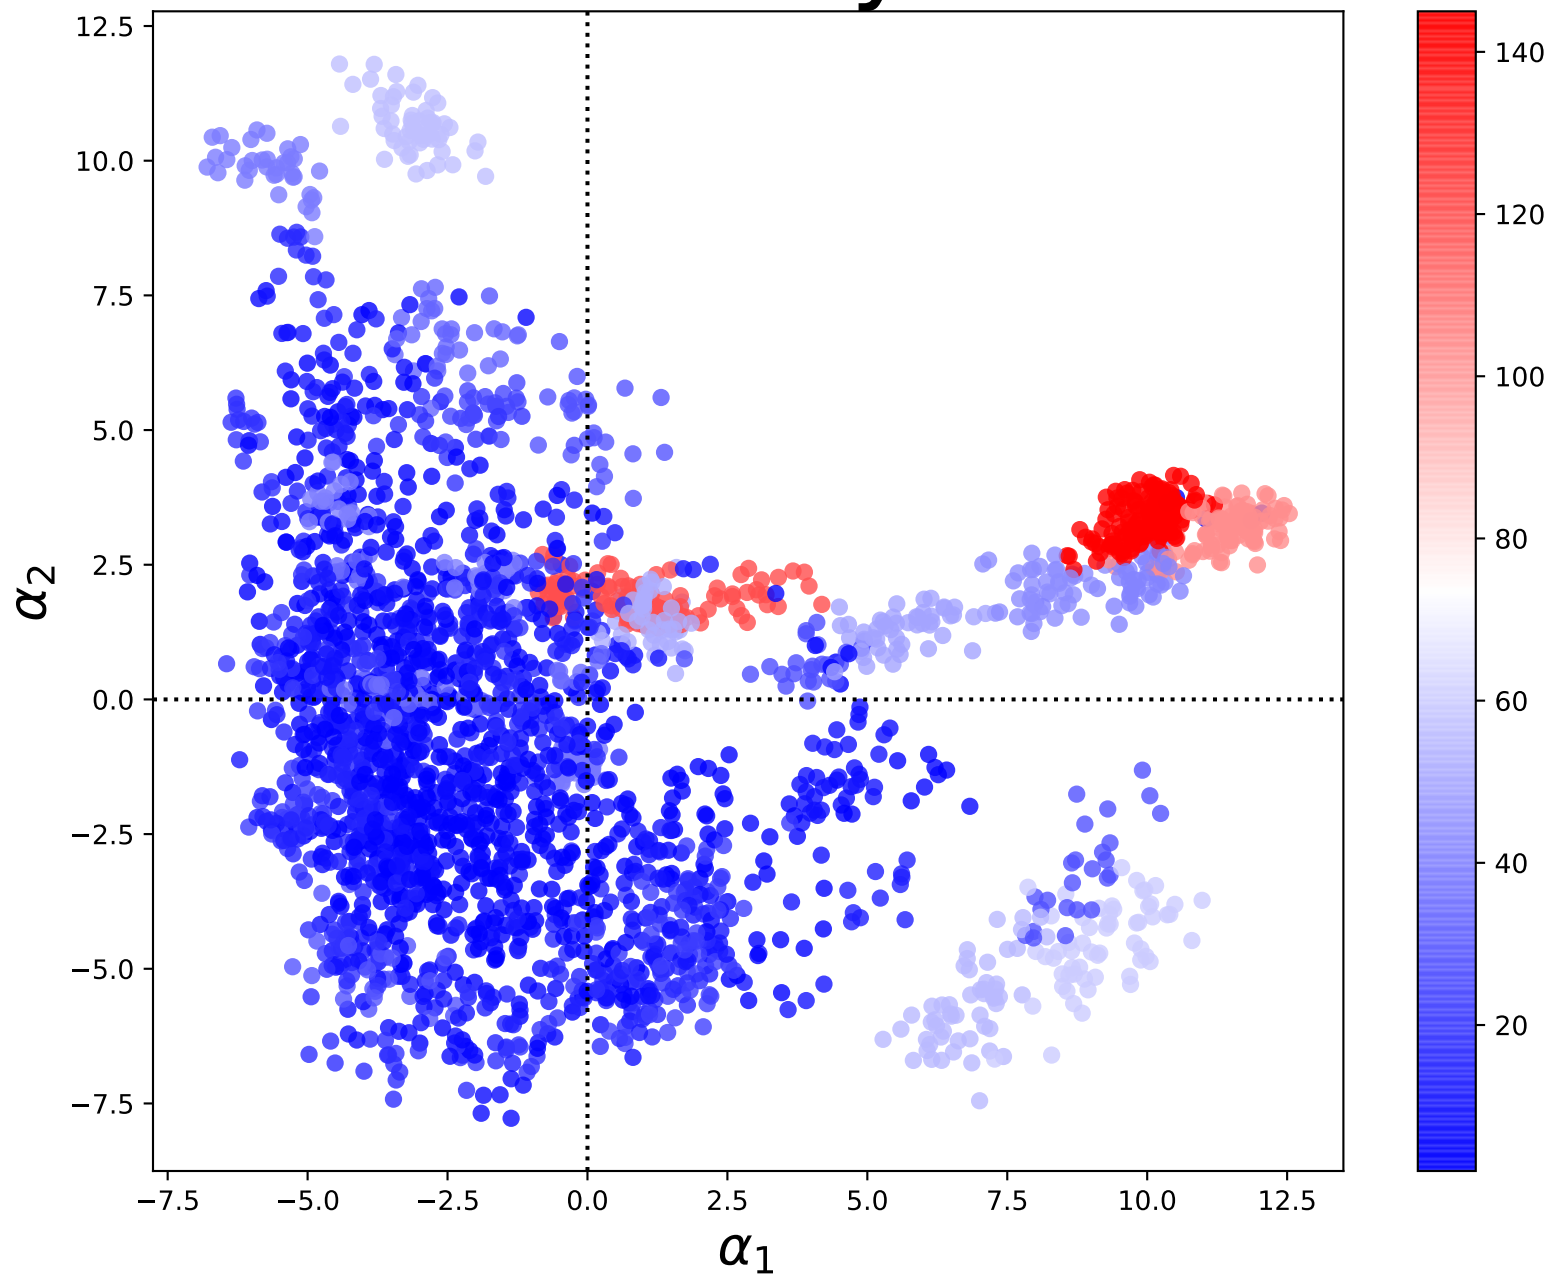

Supplement: OptionalSupplementaryData [file wf_aniso_xlnet_1.pdf › plots/appendix_plots/wf_aniso_xlnet_1.pdf]

# XLNet Layer 10

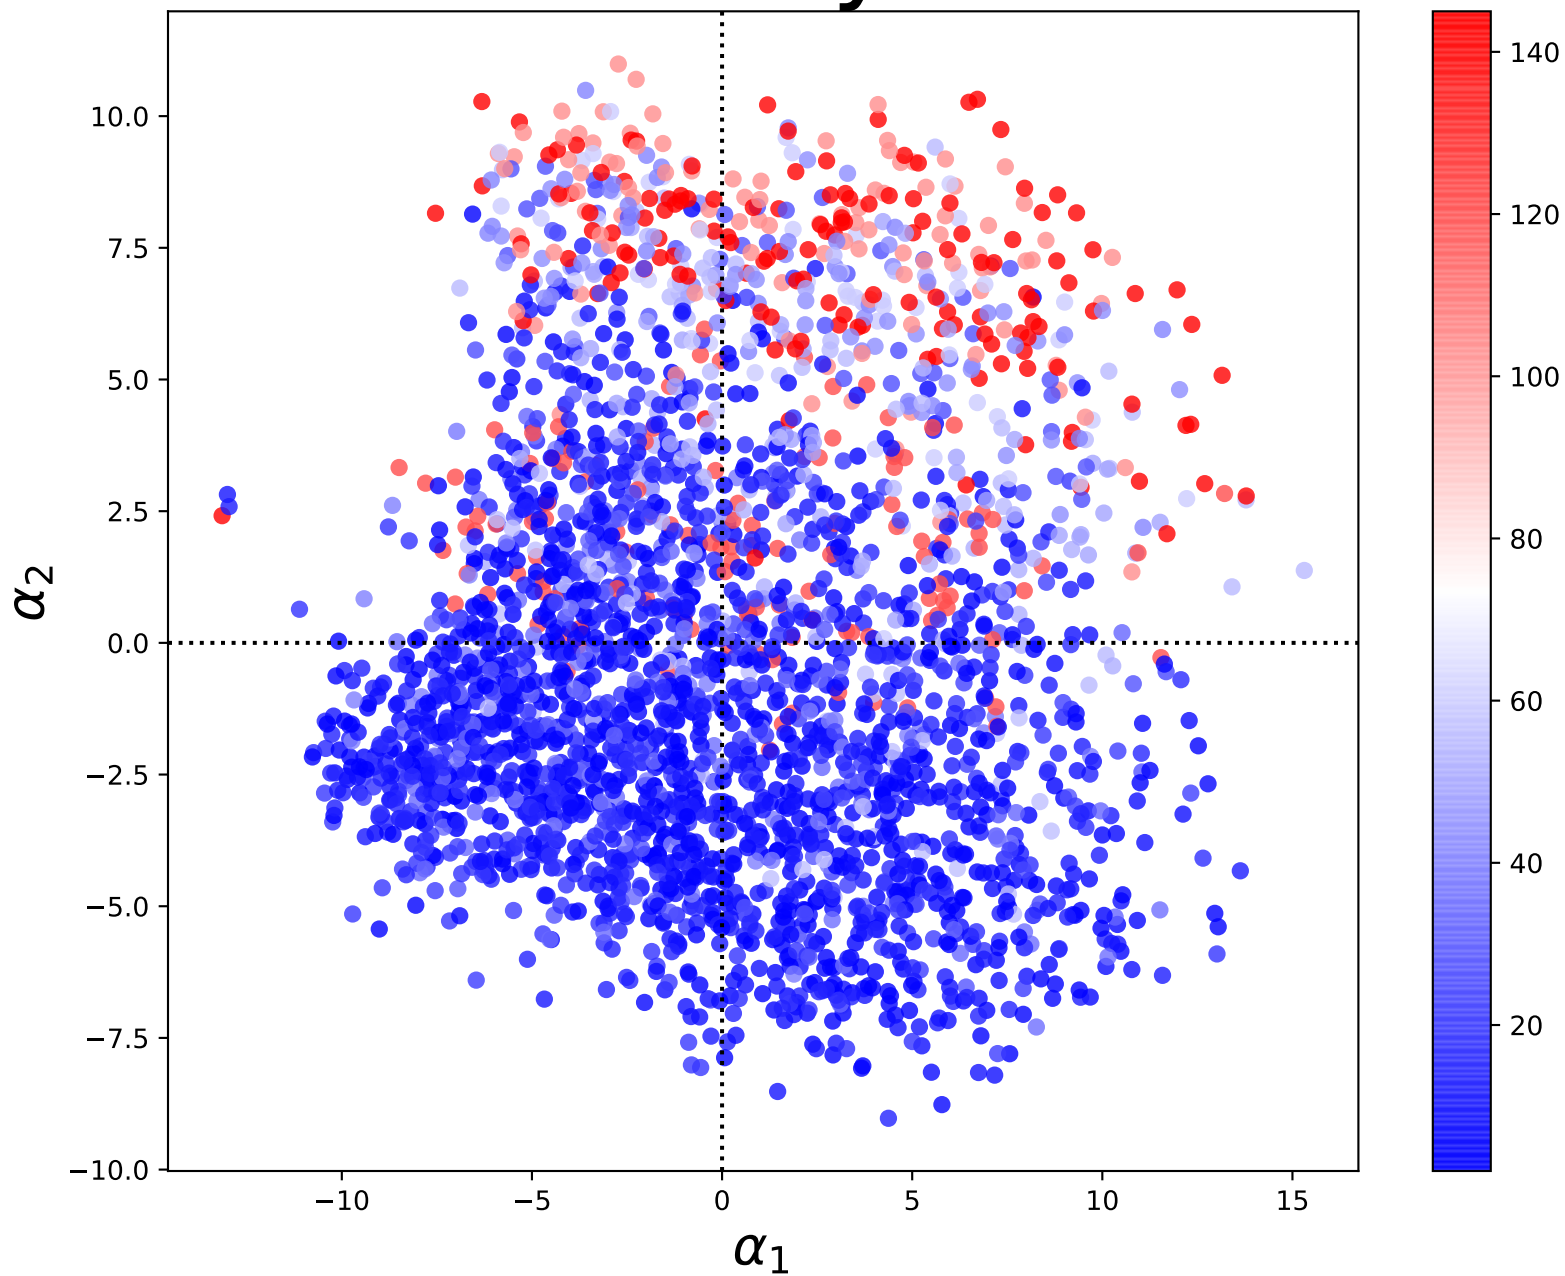

Supplement: OptionalSupplementaryData [file wf_aniso_xlnet_10.pdf › plots/appendix_plots/wf_aniso_xlnet_10.pdf]

# XLNet Layer 11

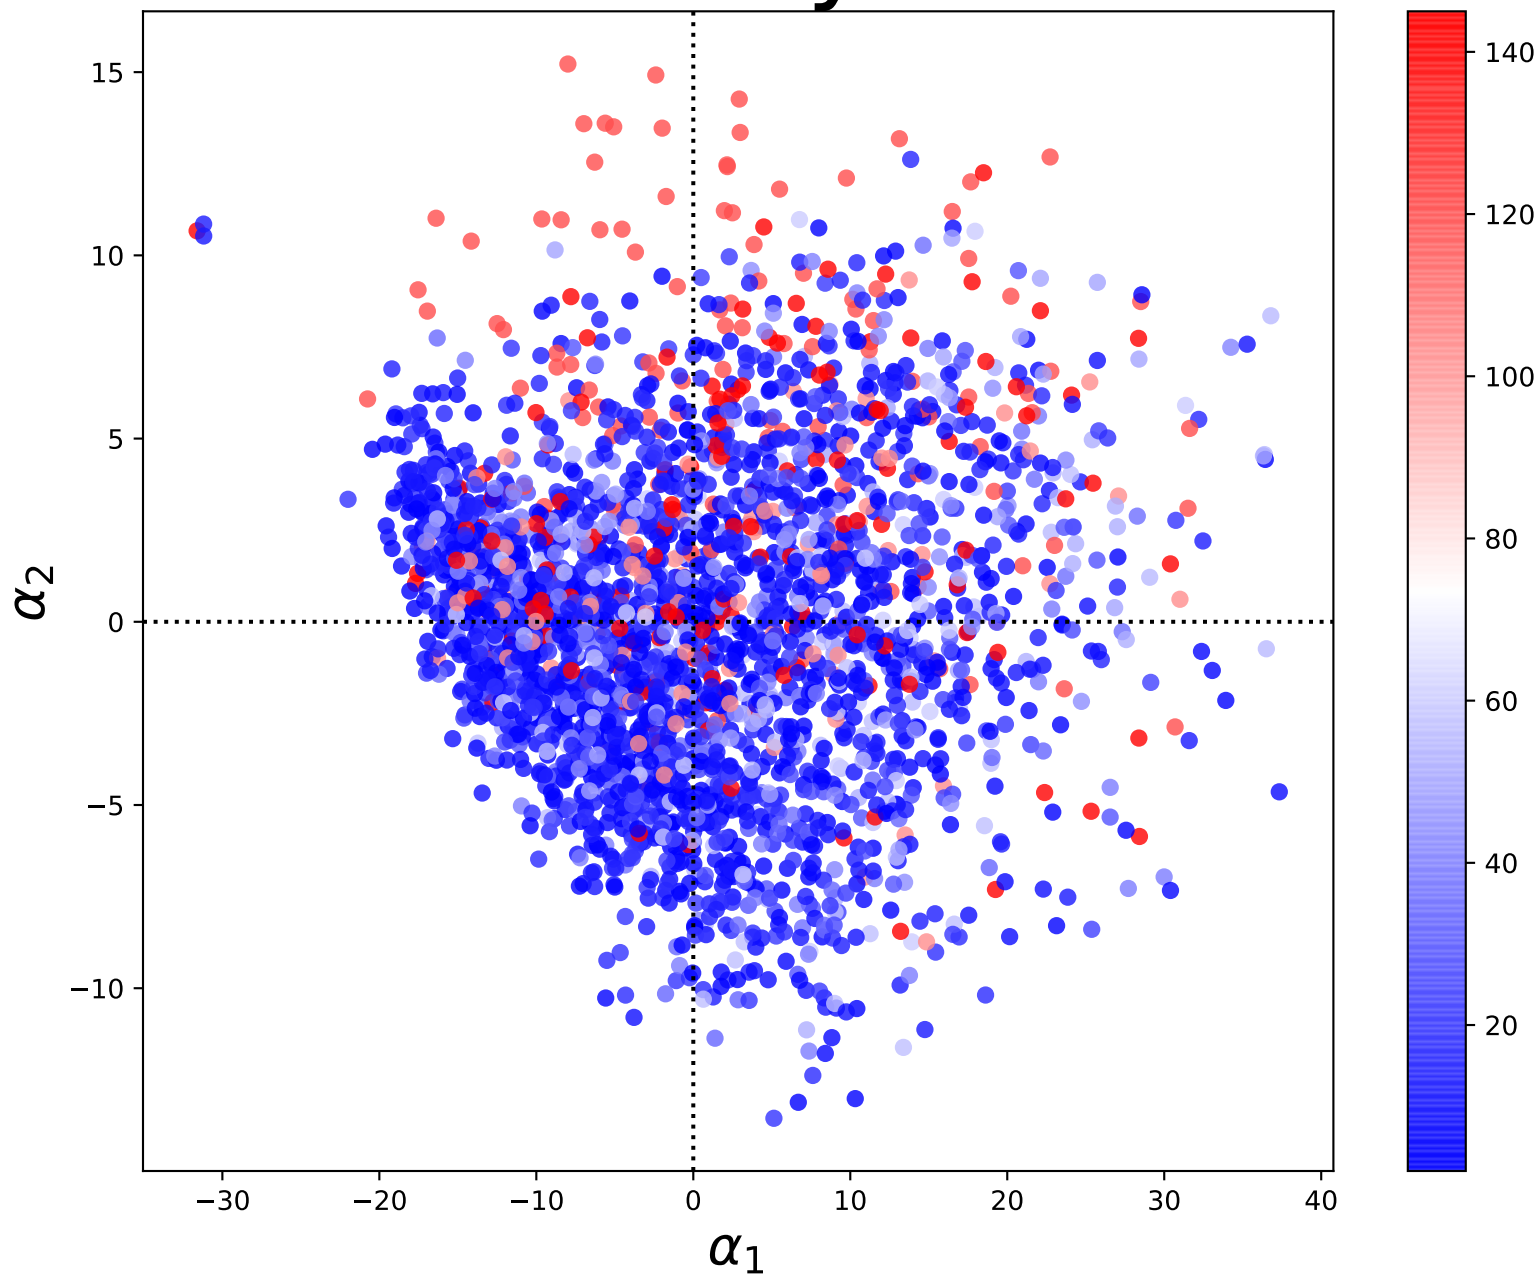

Supplement: OptionalSupplementaryData [file wf_aniso_xlnet_11.pdf › plots/appendix_plots/wf_aniso_xlnet_11.pdf]

# XLNet Layer 12

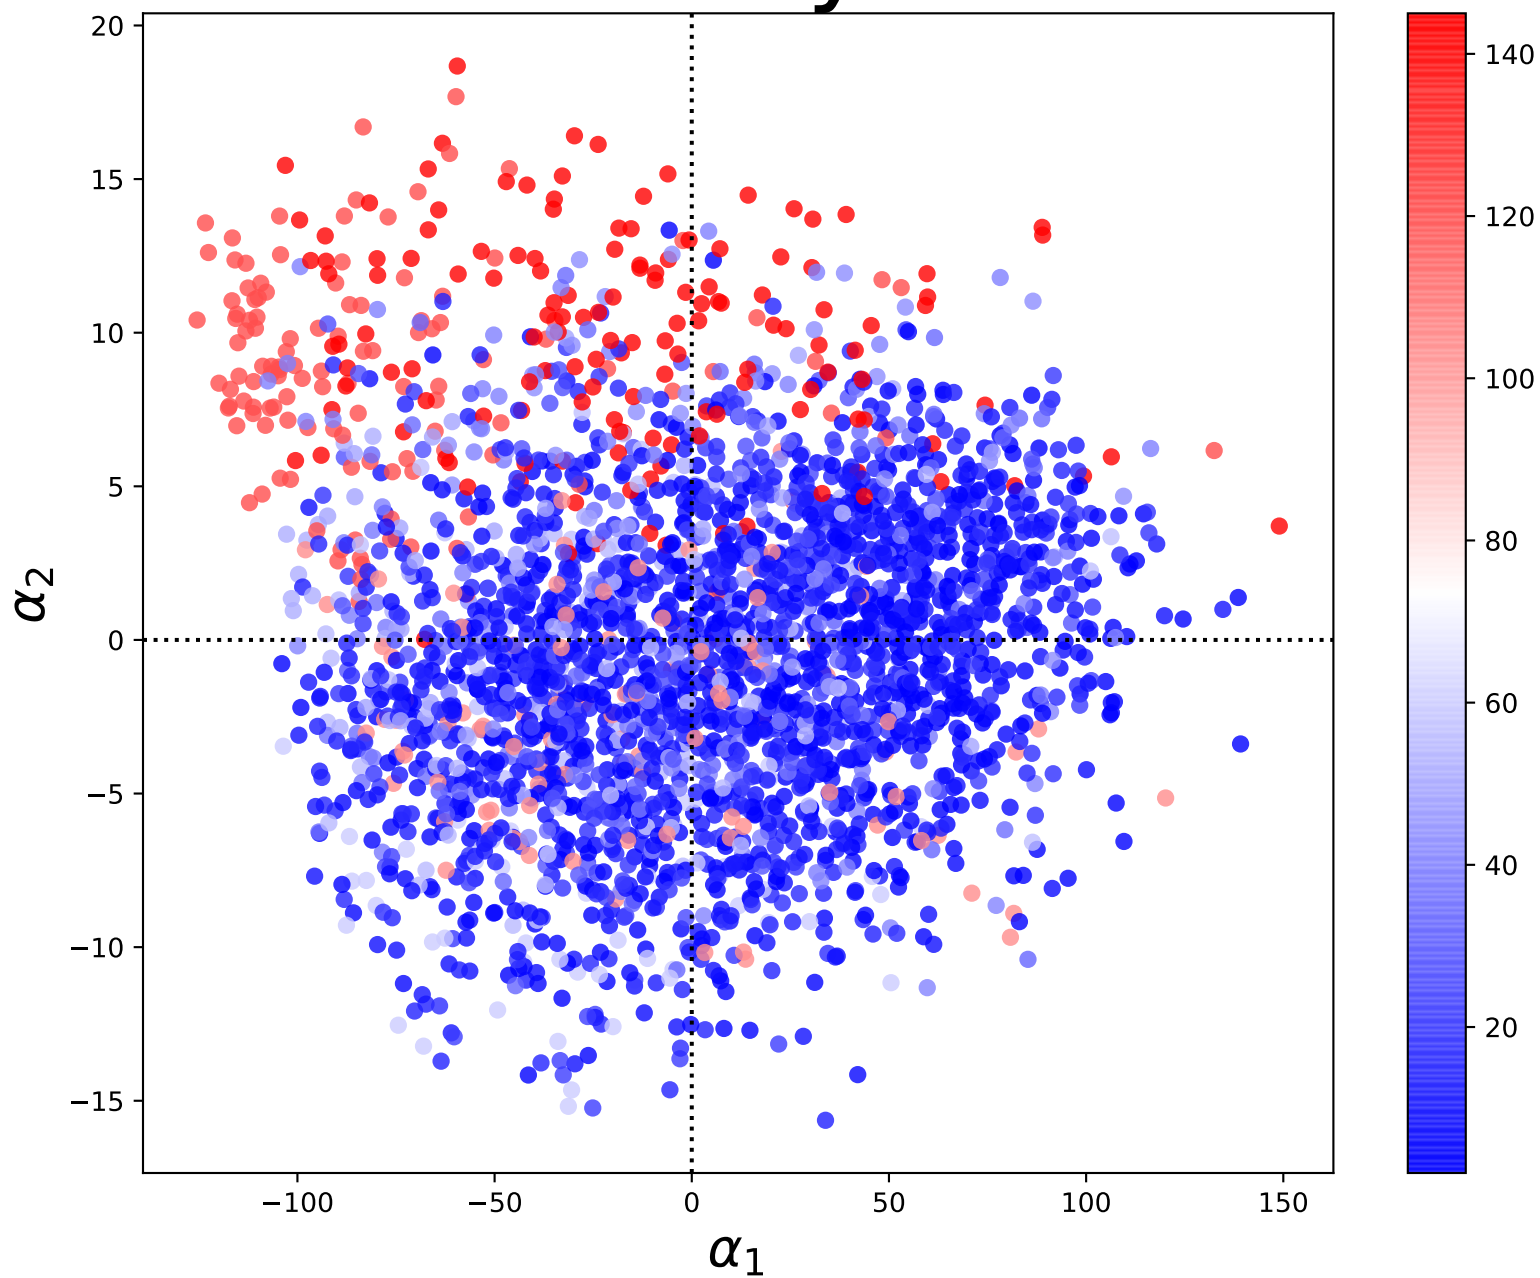

Supplement: OptionalSupplementaryData [file wf_aniso_xlnet_12.pdf › plots/appendix_plots/wf_aniso_xlnet_12.pdf]
