# Supplementary material (part 2 of 2)
Source: ML conference proceedings conference paper supplement (https://aclanthology.org/2021.deelio-1.9)

# XLNet Layer 2

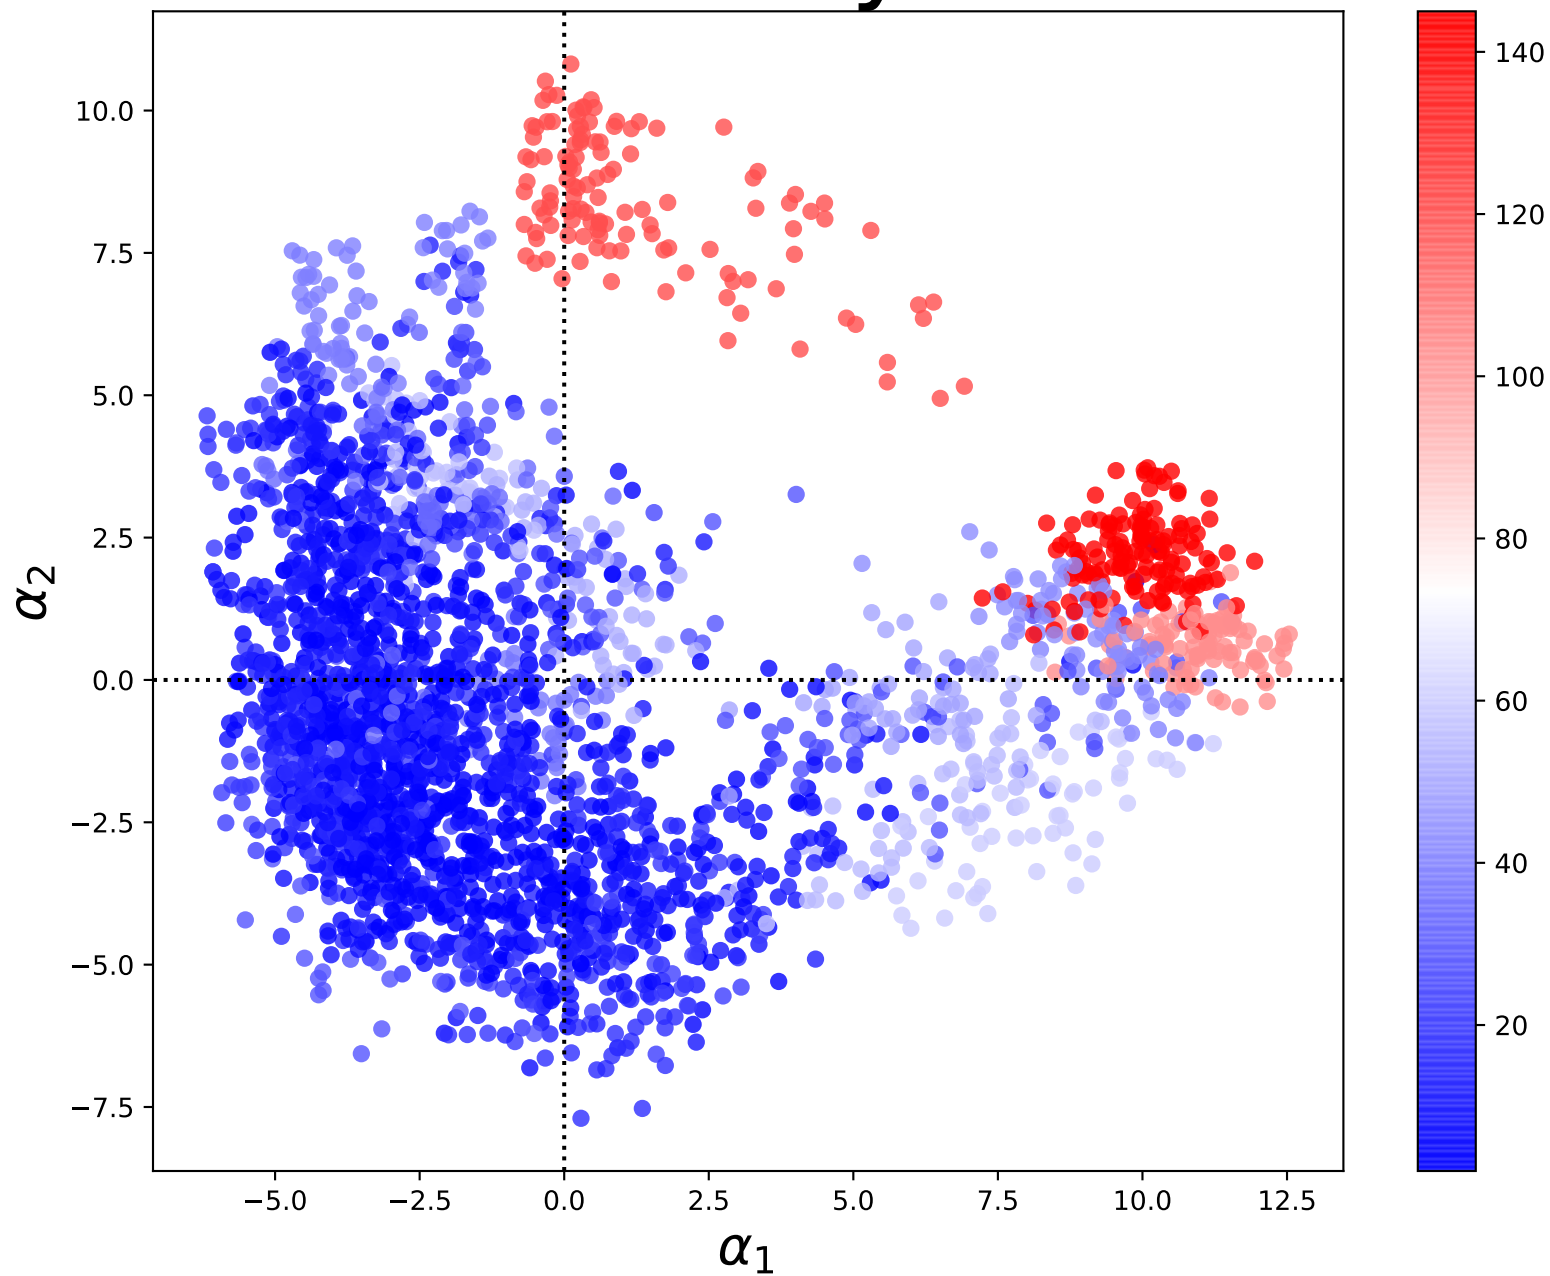

Supplement: OptionalSupplementaryData [file wf_aniso_xlnet_2.pdf › plots/appendix_plots/wf_aniso_xlnet_2.pdf]

# XLNet Layer 3

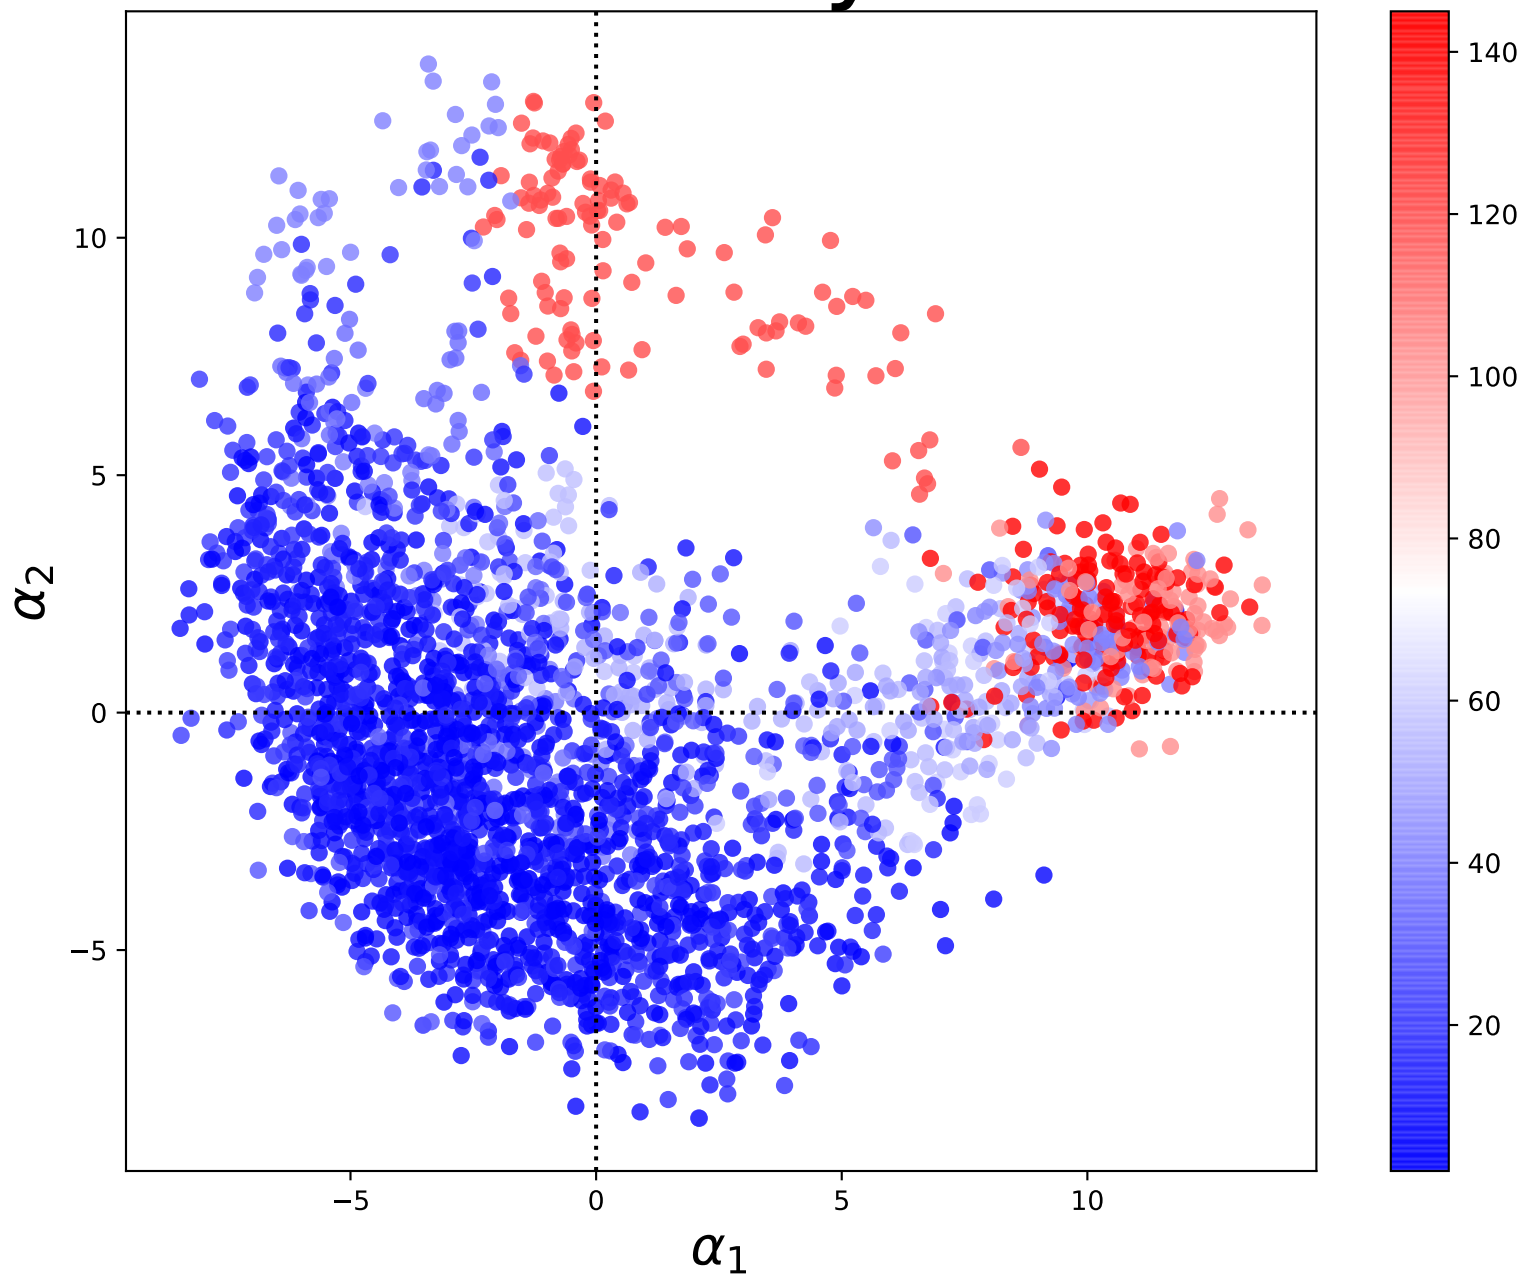

Supplement: OptionalSupplementaryData [file wf_aniso_xlnet_3.pdf › plots/appendix_plots/wf_aniso_xlnet_3.pdf]

# XLNet Layer 4

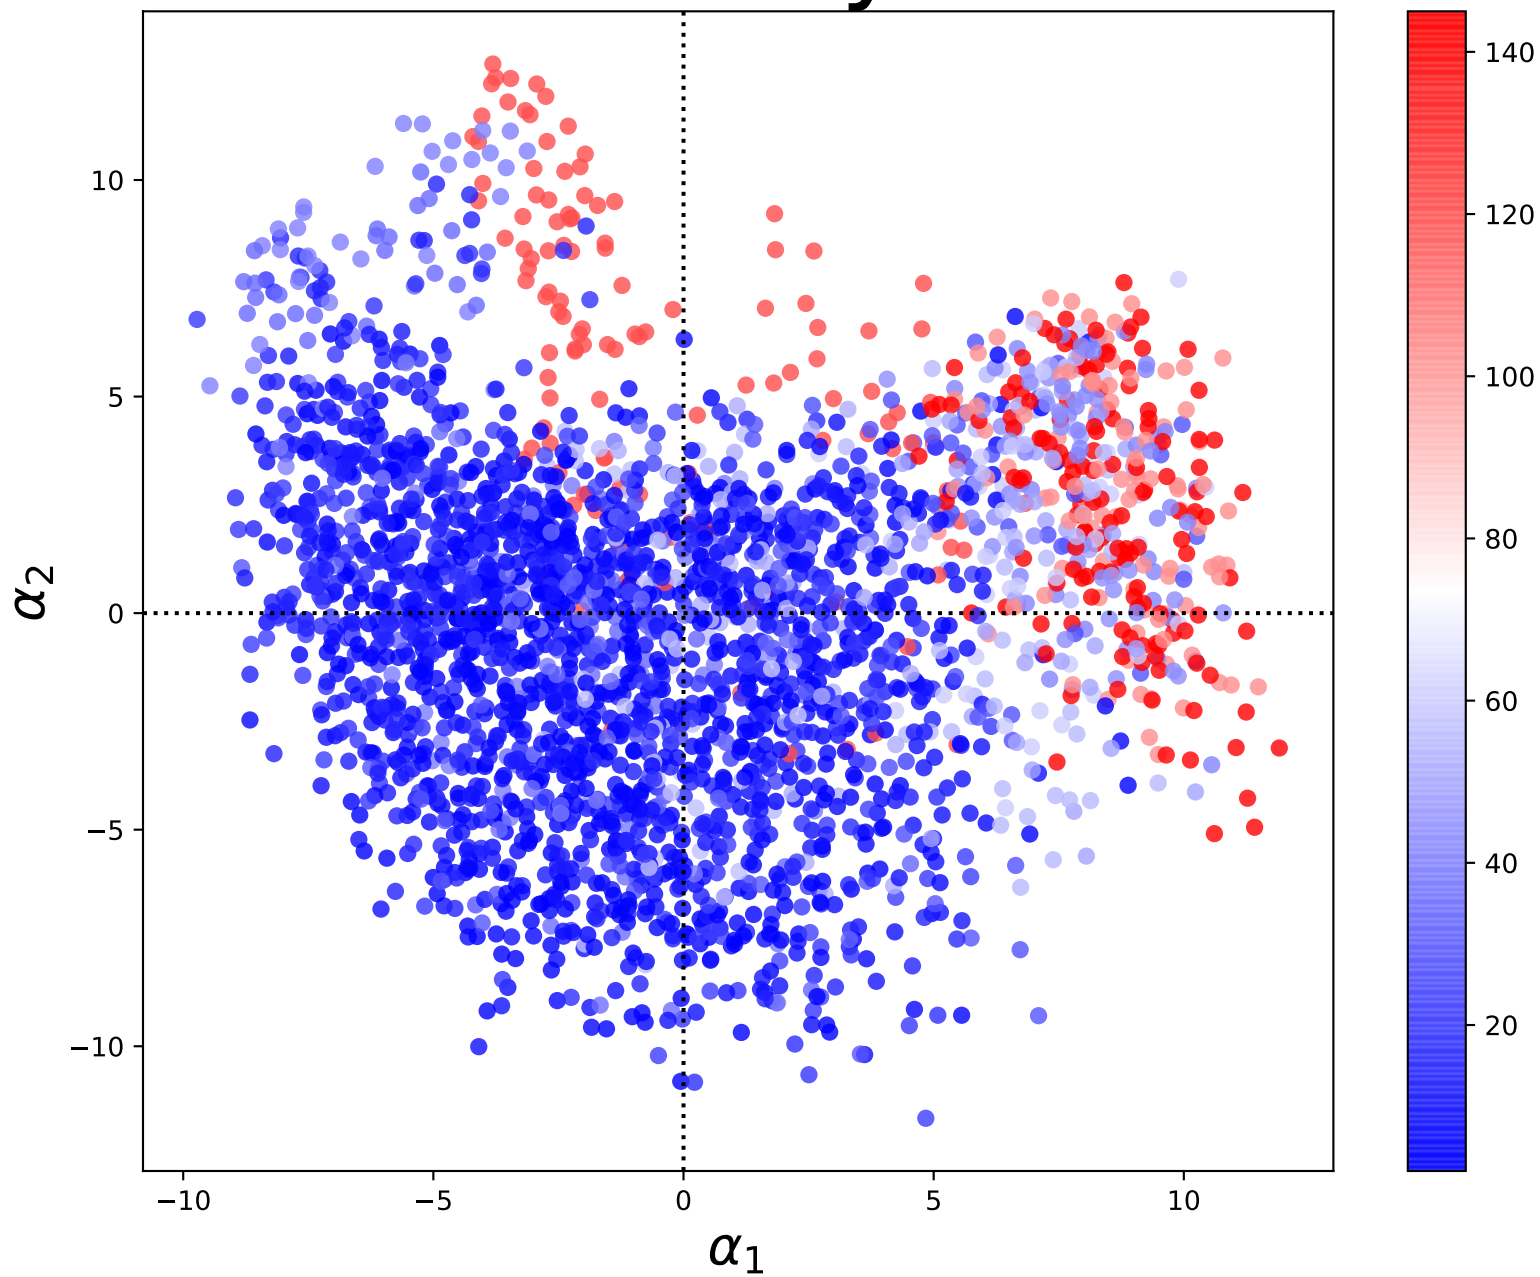

Supplement: OptionalSupplementaryData [file wf_aniso_xlnet_4.pdf › plots/appendix_plots/wf_aniso_xlnet_4.pdf]

# XLNet Layer 5

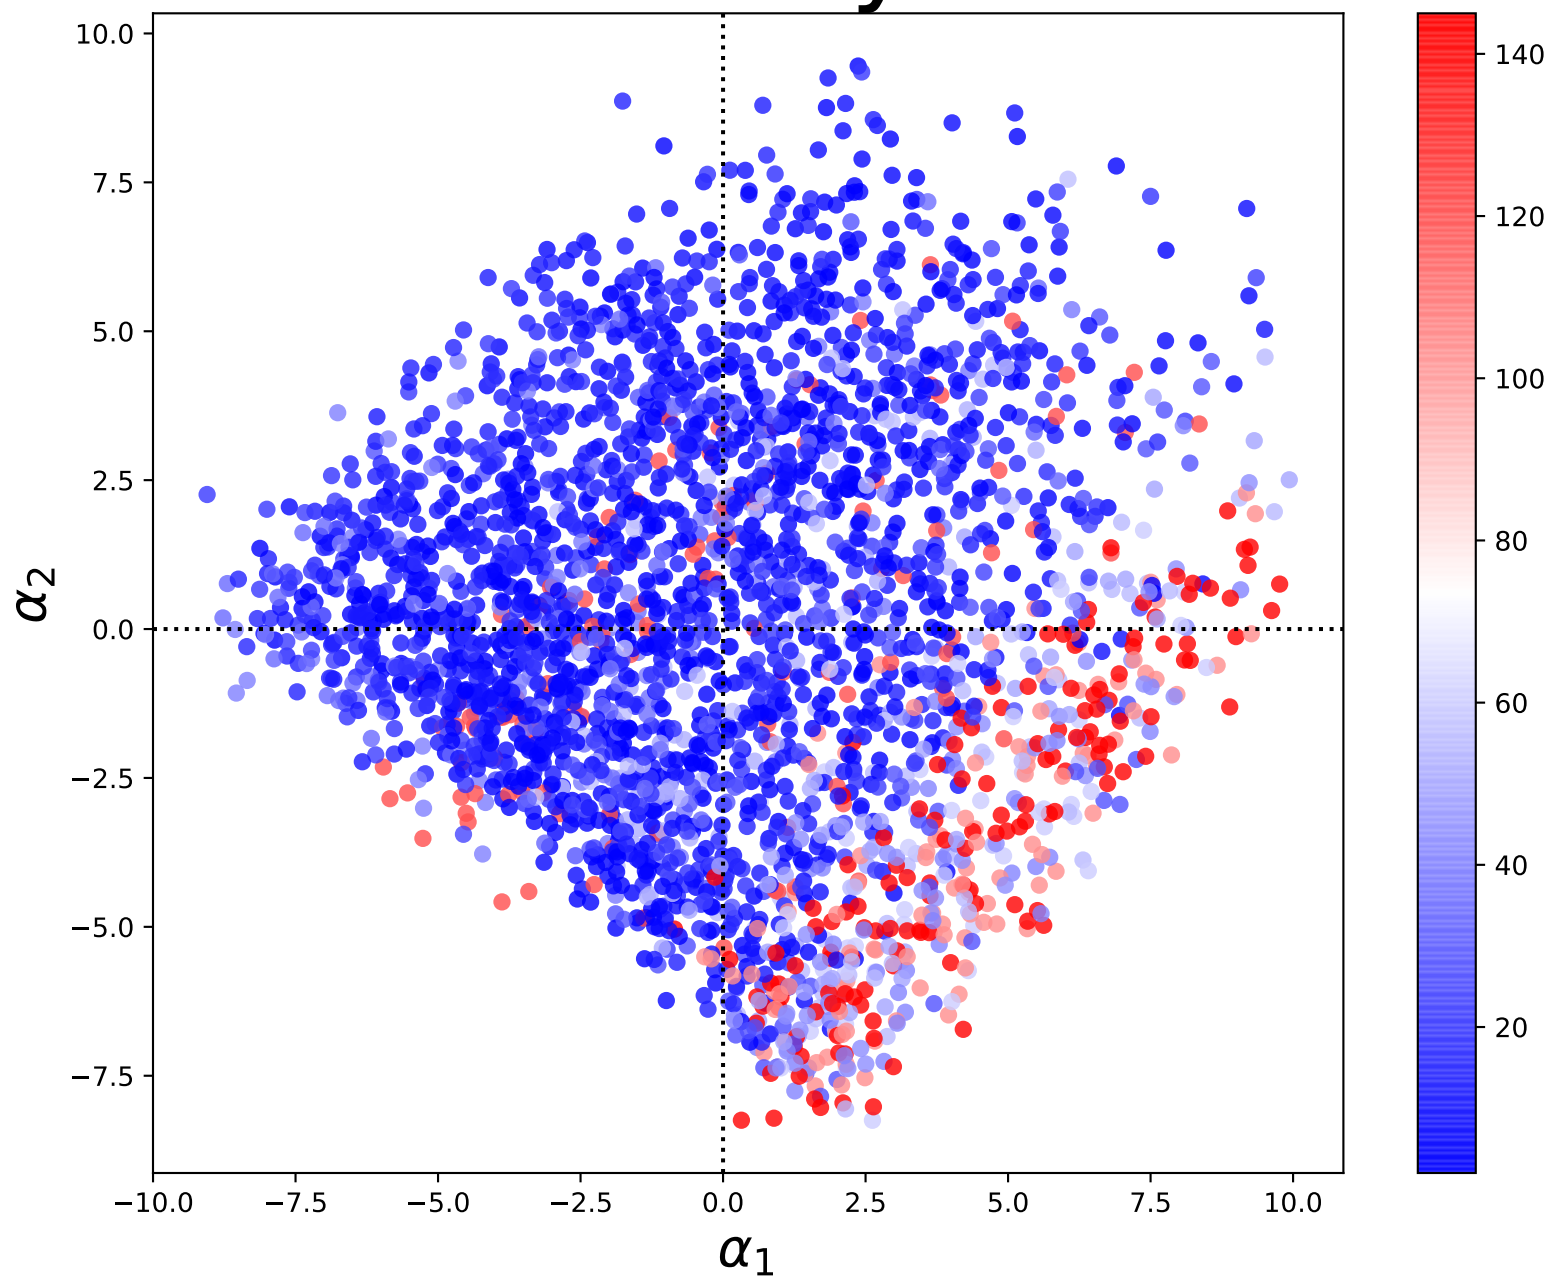

Supplement: OptionalSupplementaryData [file wf_aniso_xlnet_5.pdf › plots/appendix_plots/wf_aniso_xlnet_5.pdf]

# XLNet Layer 6

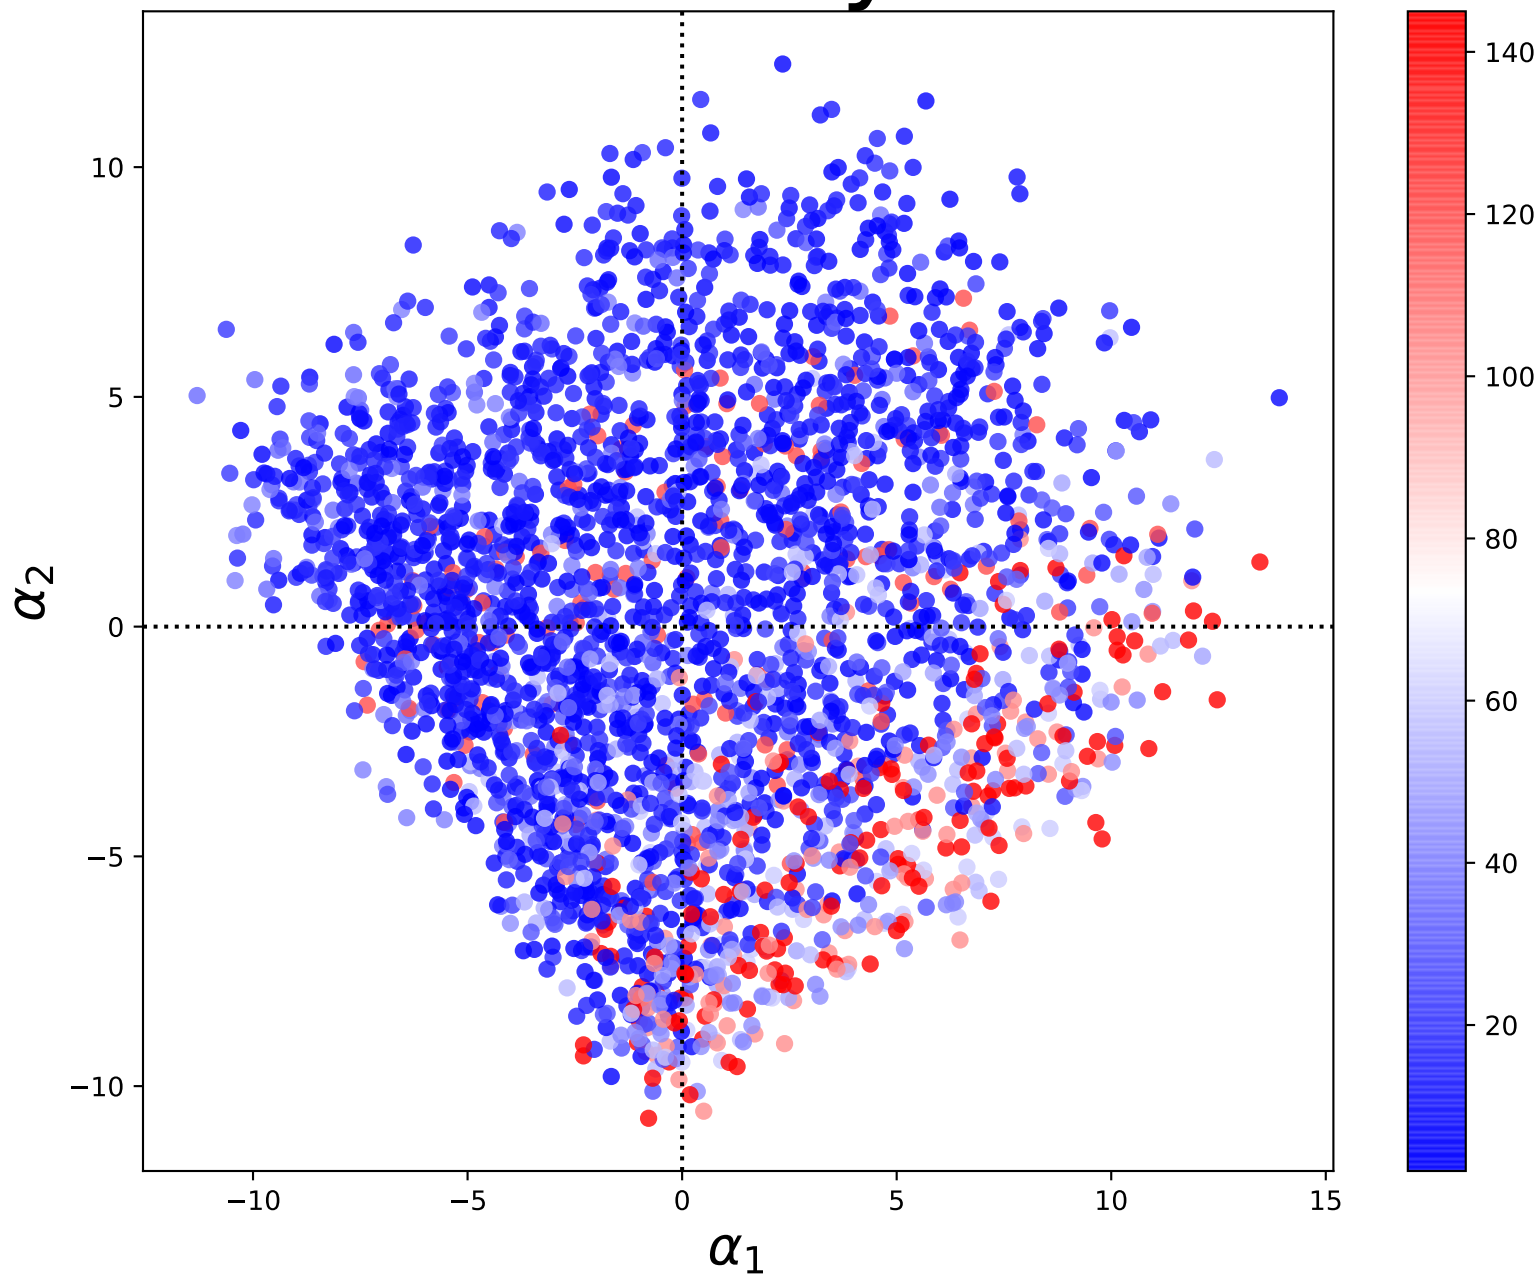

Supplement: OptionalSupplementaryData [file wf_aniso_xlnet_6.pdf › plots/appendix_plots/wf_aniso_xlnet_6.pdf]

# XLNet Layer 7

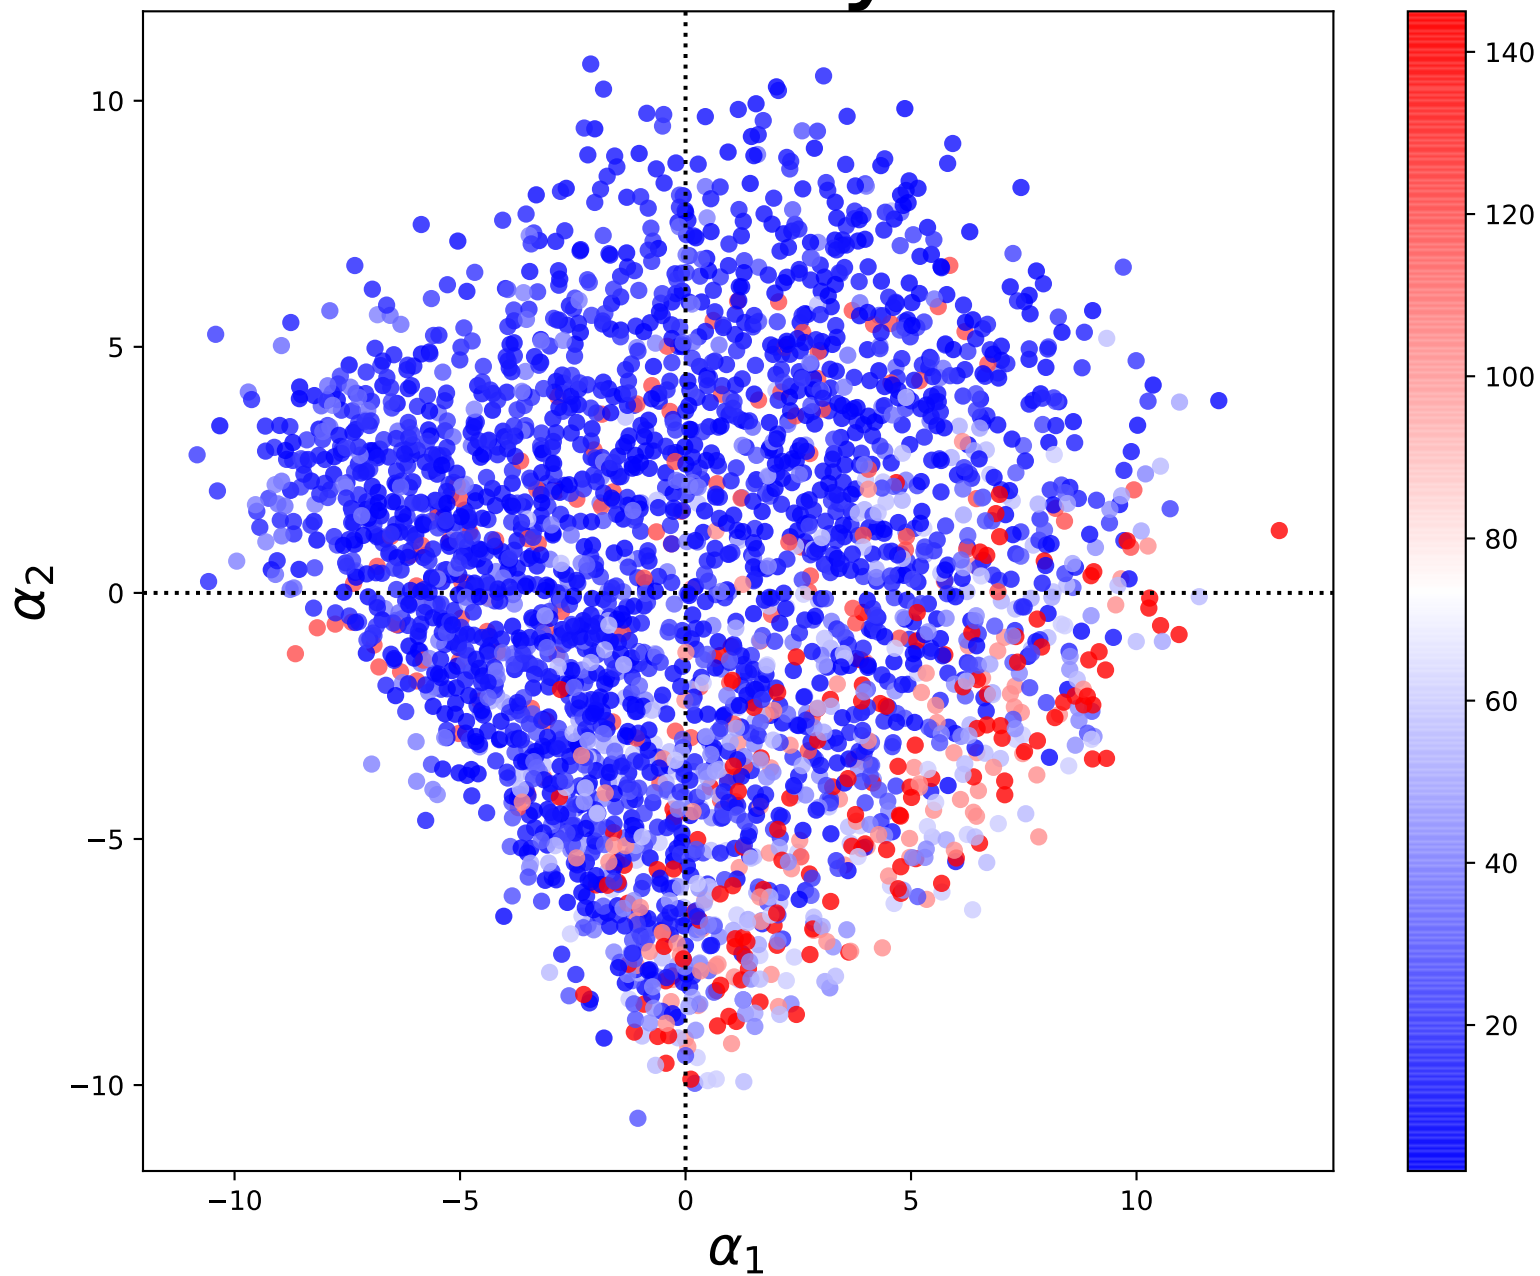

Supplement: OptionalSupplementaryData [file wf_aniso_xlnet_7.pdf › plots/appendix_plots/wf_aniso_xlnet_7.pdf]

# XLNet Layer 8

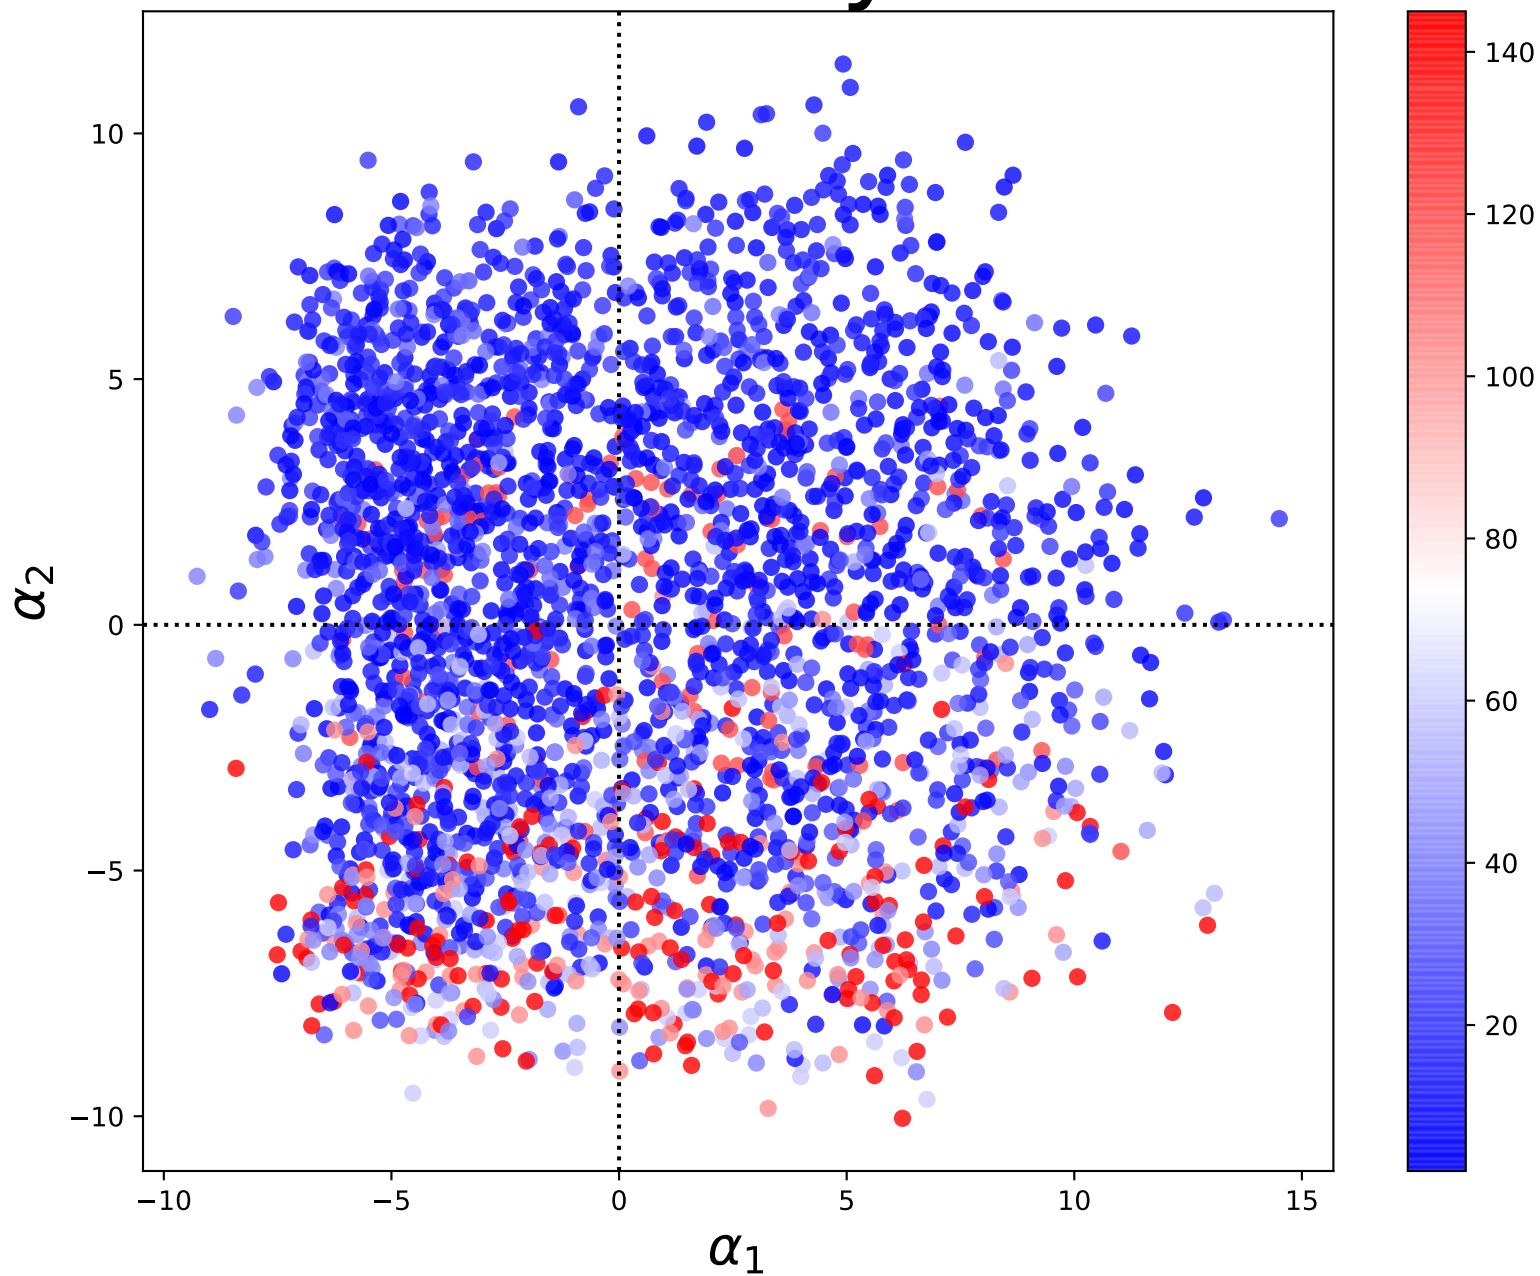

Supplement: OptionalSupplementaryData [file wf_aniso_xlnet_8.pdf › plots/appendix_plots/wf_aniso_xlnet_8.pdf]

# XLNet Layer 9

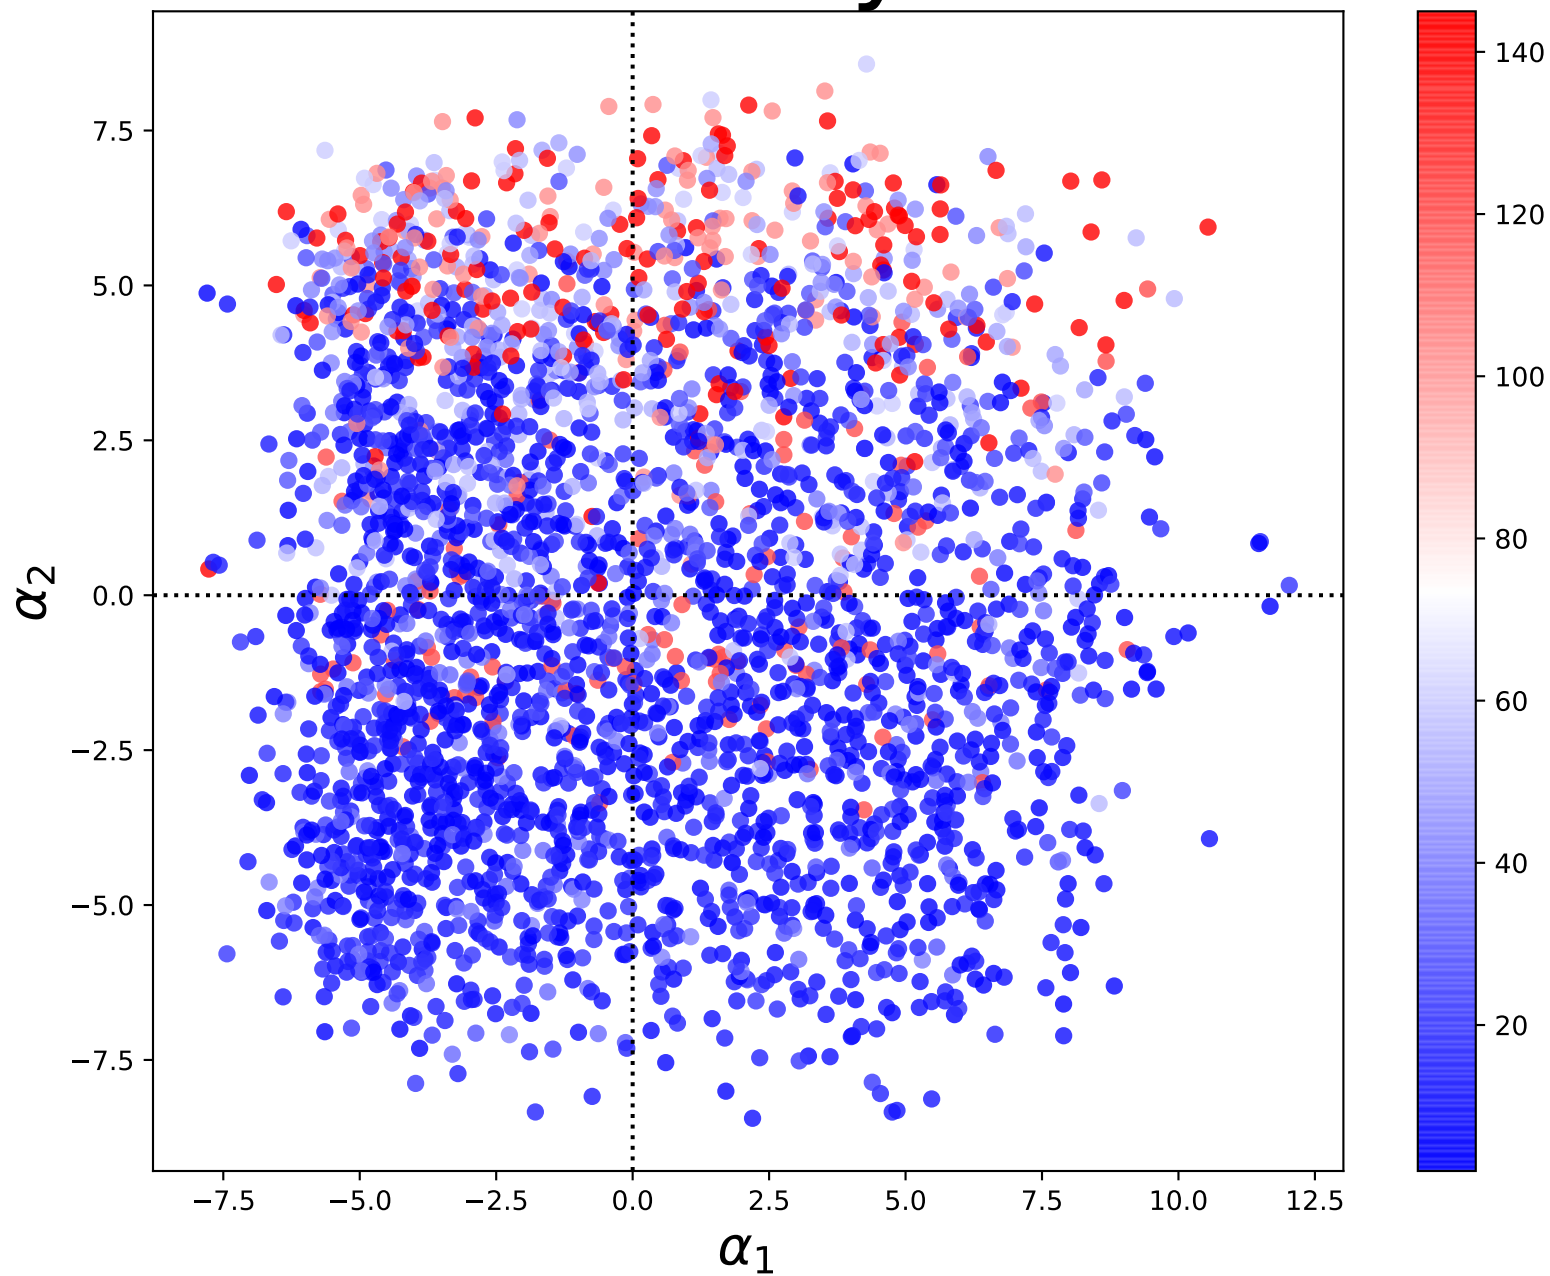

Supplement: OptionalSupplementaryData [file wf_aniso_xlnet_9.pdf › plots/appendix_plots/wf_aniso_xlnet_9.pdf]

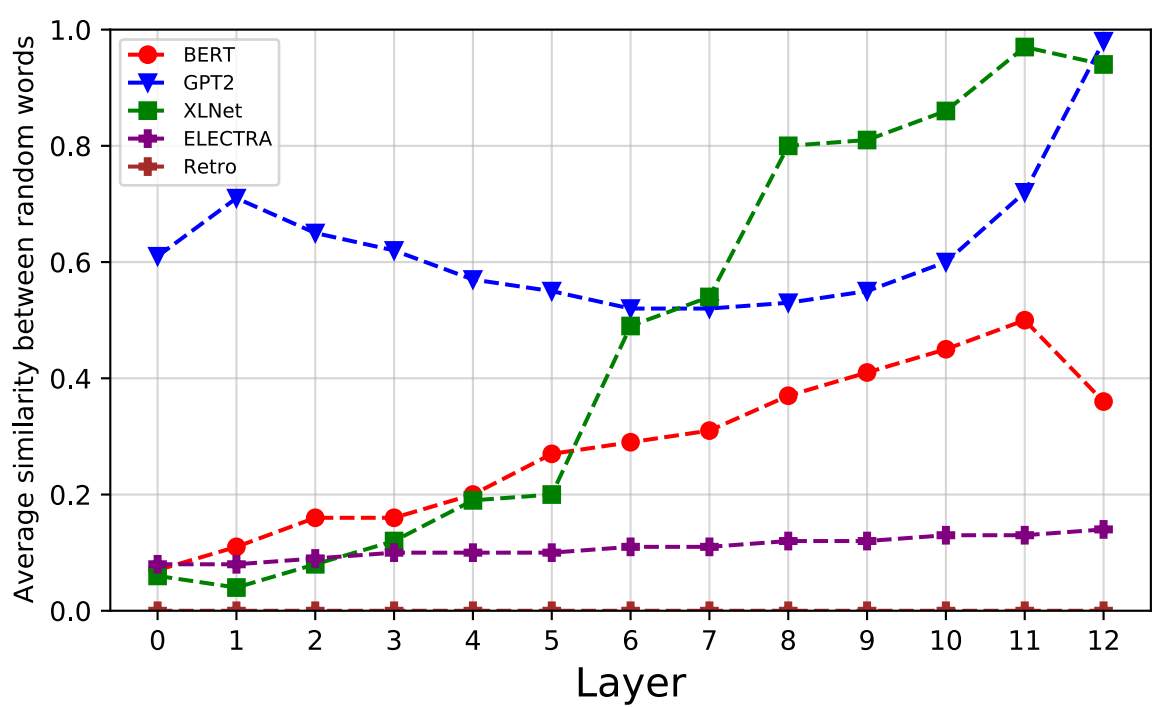

Supplement: OptionalSupplementaryData [file avg_sim_rect_1000.pdf › plots/avg_sim_rect_1000.pdf]

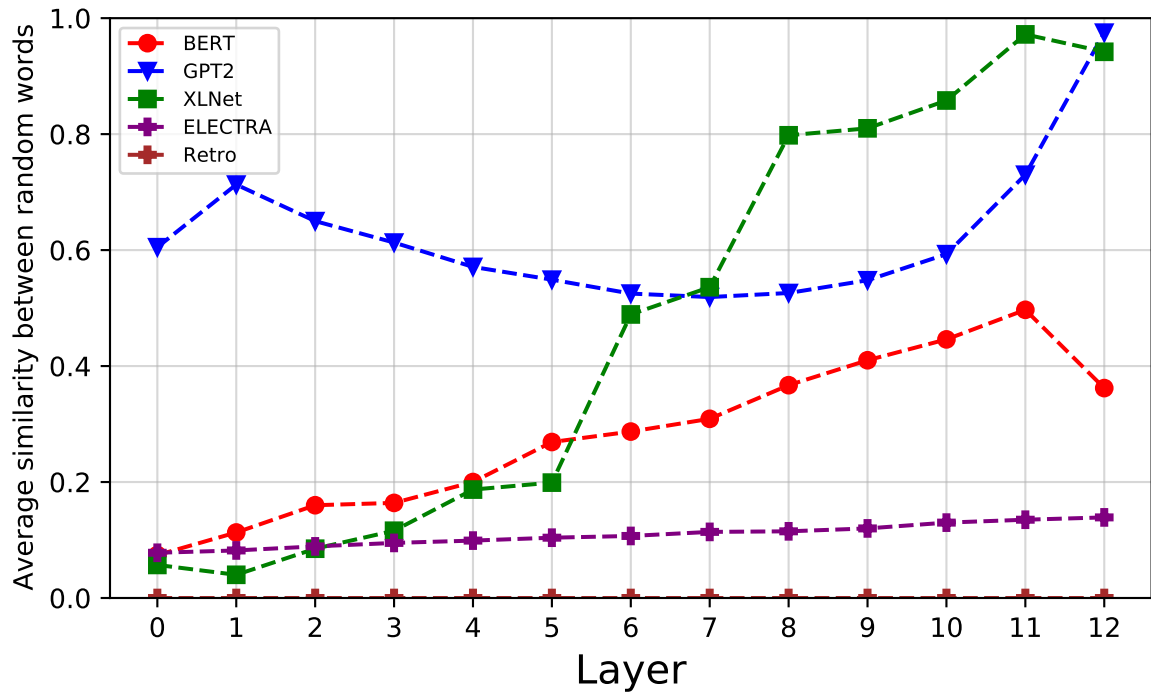

Supplement: OptionalSupplementaryData [file avg_sim_rect_all.pdf › plots/avg_sim_rect_all.pdf]

# BERT (Layer 11)

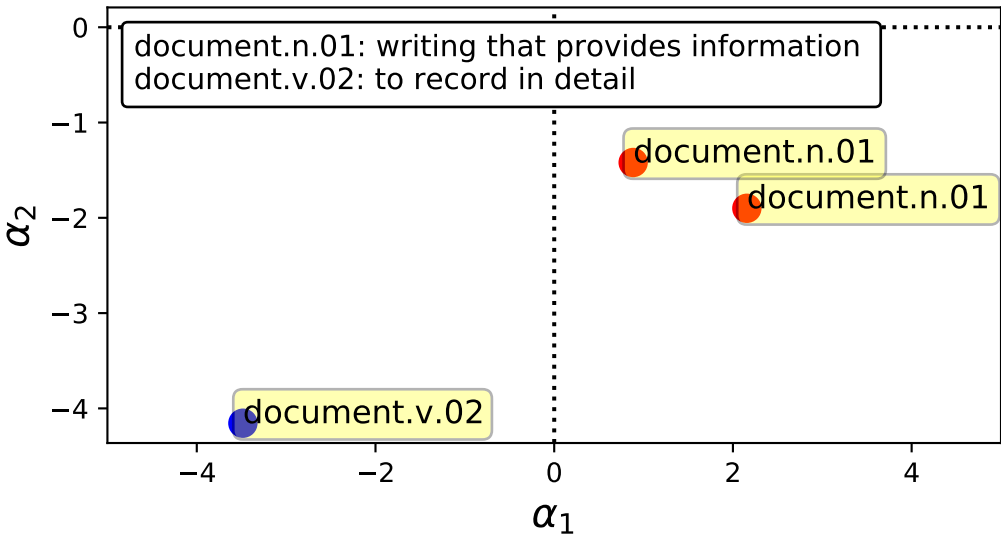

Supplement: OptionalSupplementaryData [file original_example.pdf › plots/original_example.pdf]

# BERT (Layer 11)

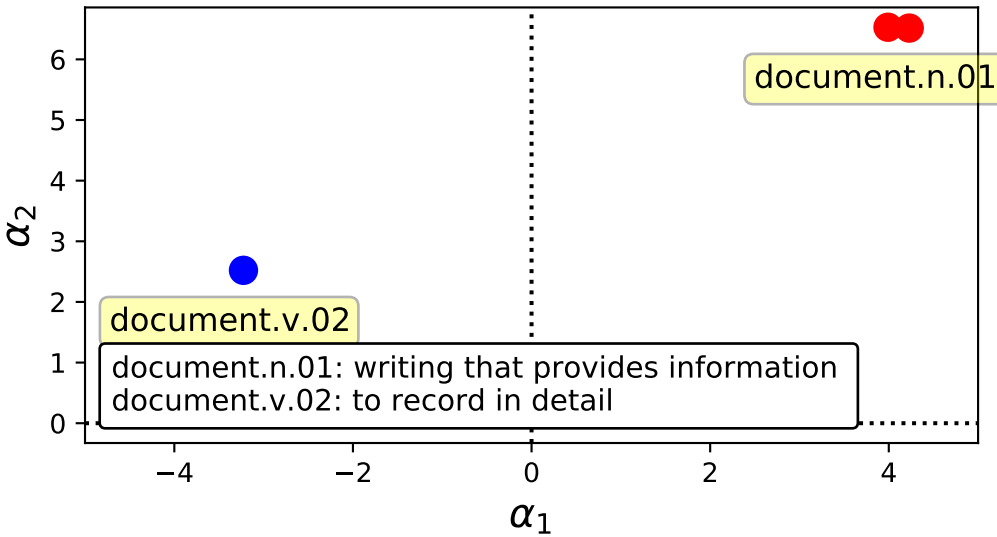

Supplement: OptionalSupplementaryData [file retrofitted_example.pdf › plots/retrofitted_example.pdf]
